# Supplementary material for: The H2Bub1-deposition complex is required for human and mouse cardiogenesis
Source: PubMed Central journal article supplement (PMC10730087; doi:10.1242/dev.201899), 2023-12-01
Supplement: develop-150-201899-s1.pdf [file develop-150-201899-s1.pdf]

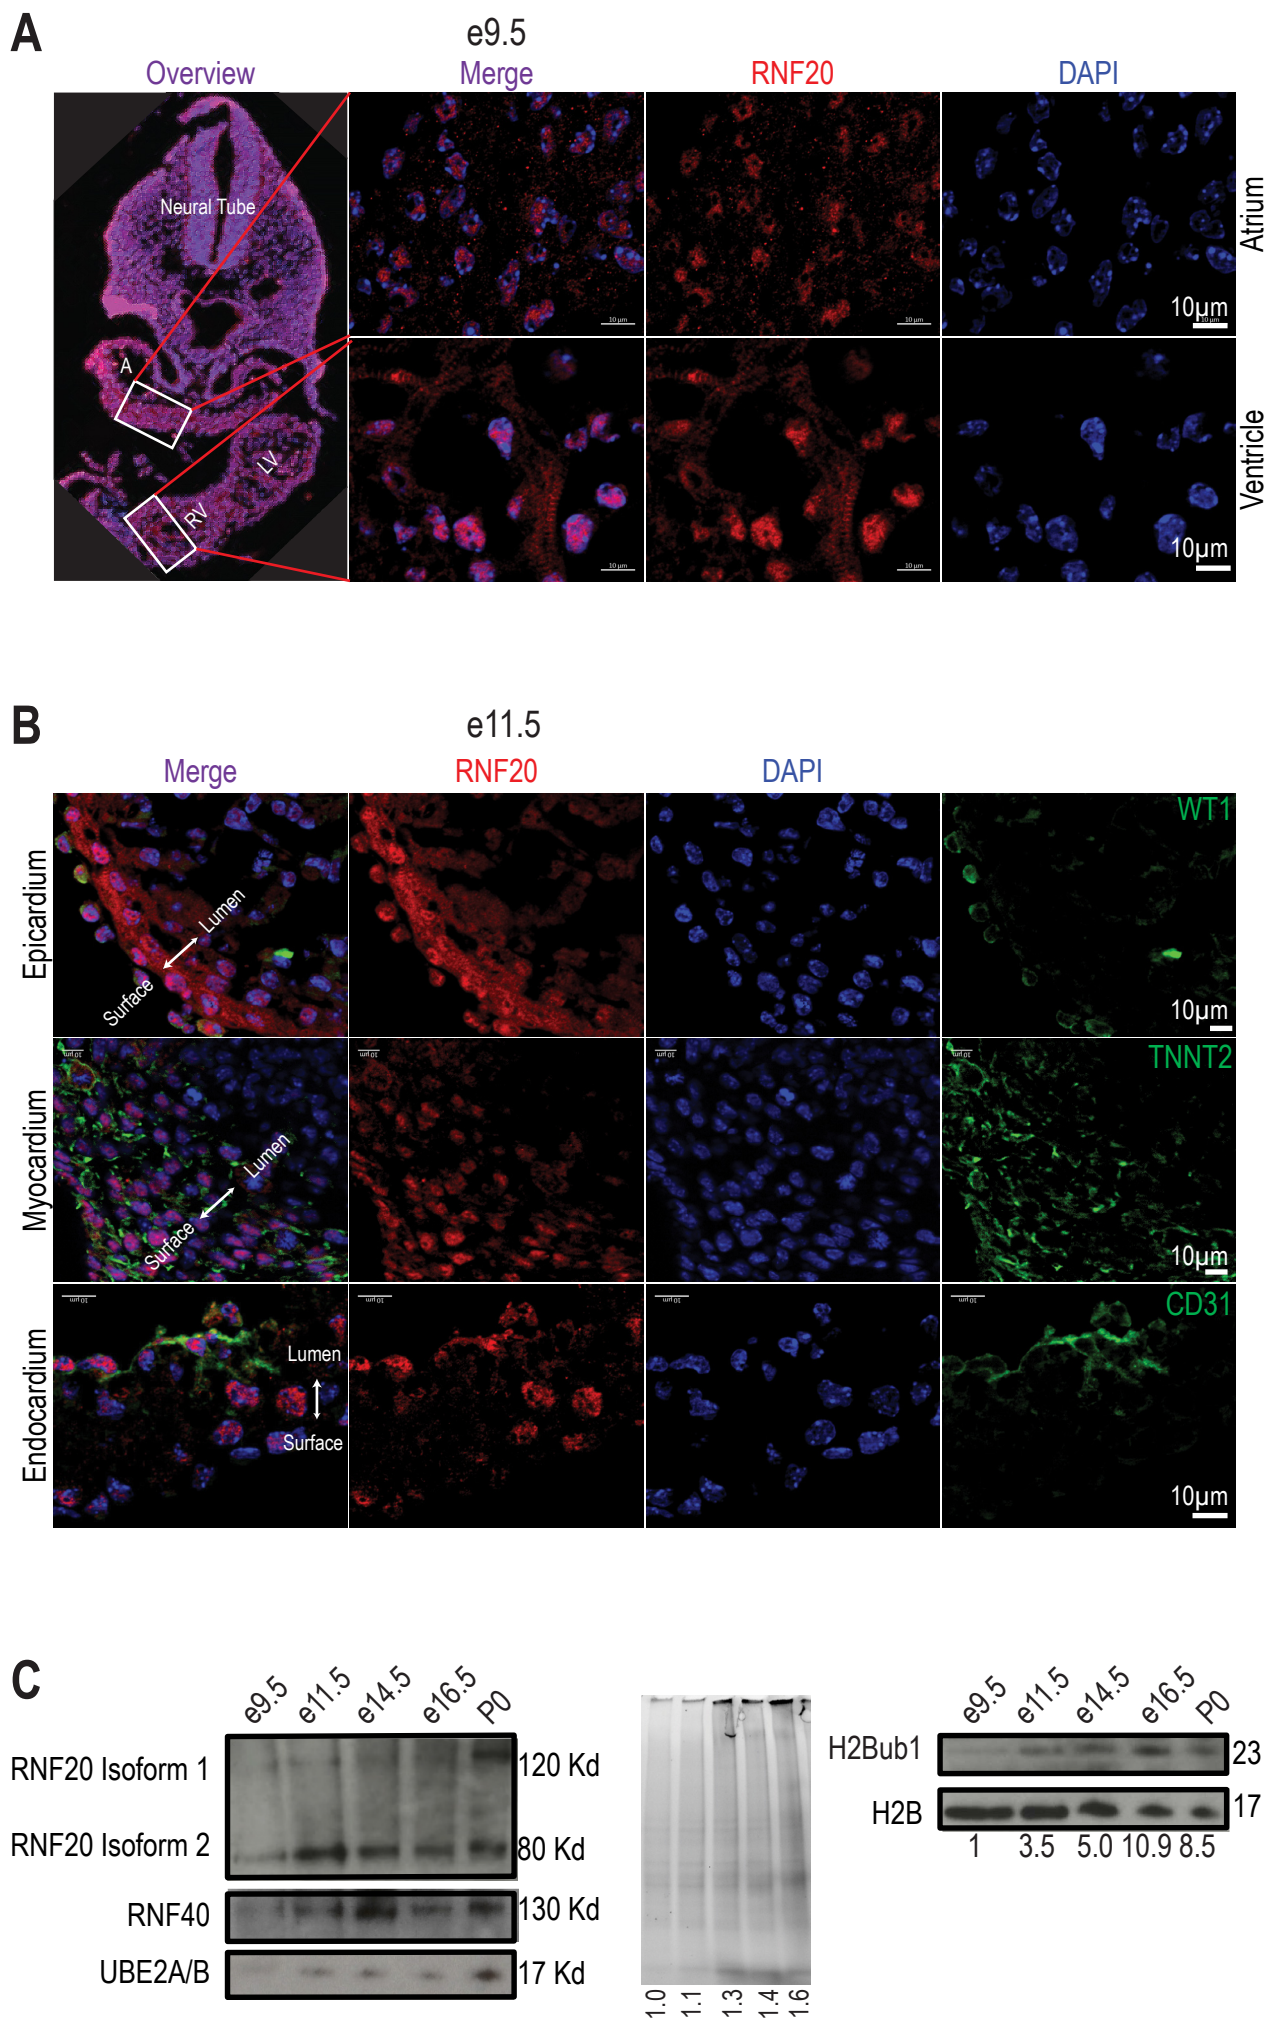

**Fig. S1. RNF20 is dynamically expressed during mouse heart development.** (A) Immunofluorescent staining for RNF20 in different sections (atrium and ventricle) of the e9.5 wild-type mouse heart. A – atrium, LV – left ventricle, RV – right ventricle. (B) Immunofluorescent staining for RNF20 and cell type markers (Epicardium, WT1; Myocardium, TNNT2; Endocardium, CD31) in e11.5 wild-type mouse hearts. (C) Western blot for H2Bub1-deposition complex components (RNF20, RNF40, and UBE2B) and H2Bub1 in wild-type mouse hearts (e9.5, e11.5, e14.5, e16.5, and P0). The loading control for the complex components is total protein (shown next to the western blots with relative intensities given underneath) and for H2Bub1 is H2B.

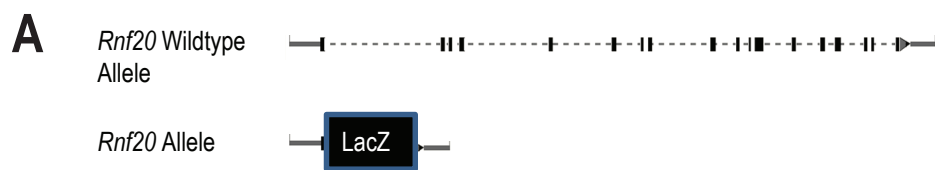

**B**

| <i>Rnf20</i> <sup>+/-</sup> |                  |
|-----------------------------|------------------|
| P0                          |                  |
| +/+                         | 33.1% (346/1045) |
| +/-                         | 66.9% (699/1045) |
| -/-                         | 0% (0/1045)      |

**Fig. S2. Phenotype of *Rnf20*<sup>-/-</sup> mutants.** (A) Diagram illustrating the *Rnf20* deletion (KOMP2). This mouse replaces the coding region of *Rnf20* with LACZ. (B) Percent of each genotype of P0 mice born from the cross of two *Rnf20*<sup>+/-</sup> mice.

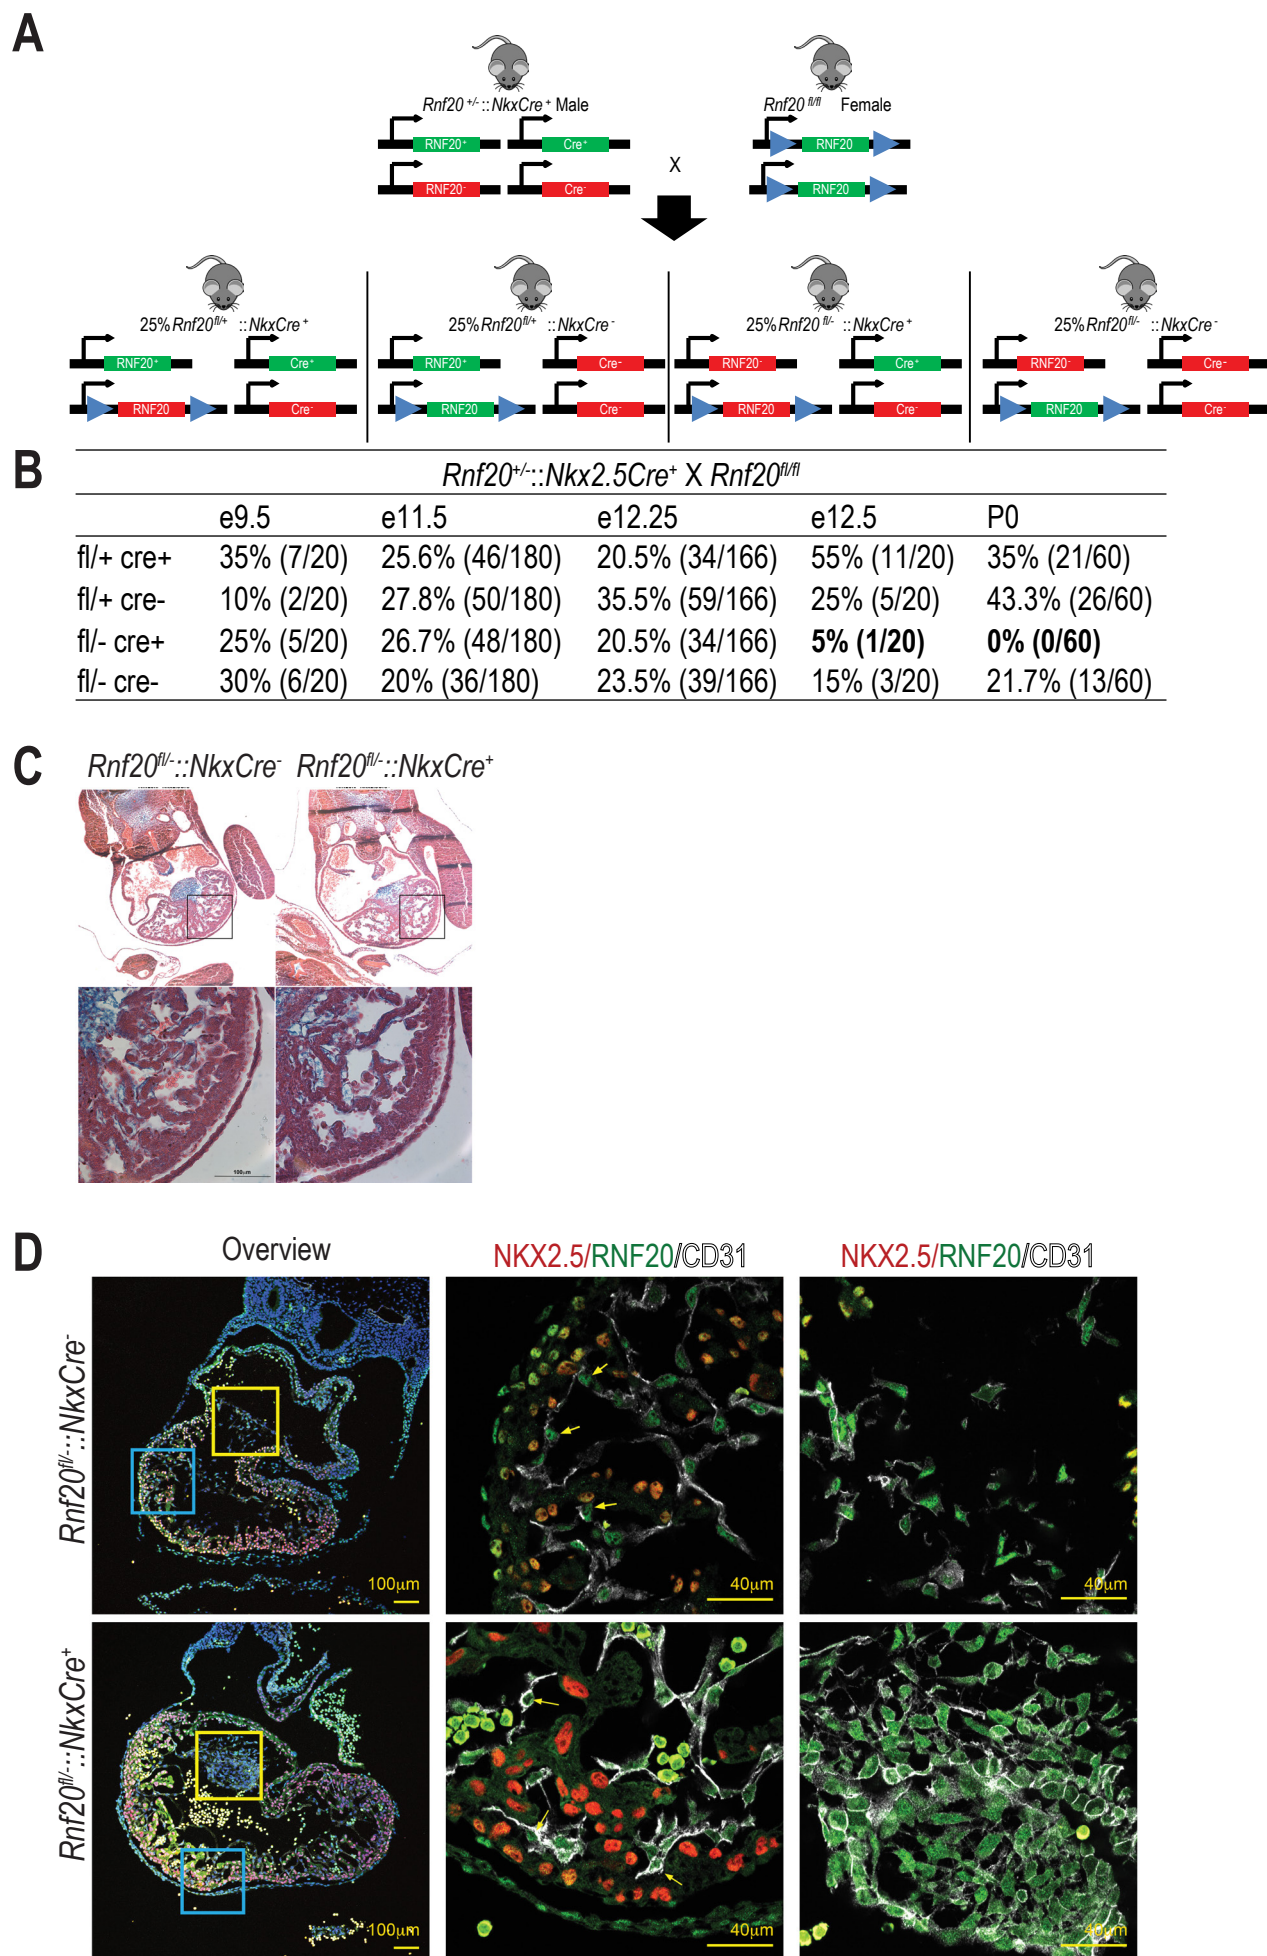

**Fig. S3. Breeding strategy and phenotype of *Rnf20* conditional mutants**

(*Nkx2.5Cre*). (A) Diagram illustrating the mouse breeding scheme for the conditional knockout mice. (B) Percent of each genotype of e9.5, e11.5, e12.25, e12.5, and P0 from the cross of *Rnf20<sup>fl/fl</sup>* and *Rnf20<sup>+/+</sup>::Nkx2.5Cre<sup>+</sup>*. (C) Example hematoxylin and eosin stained e11.5 wild-type (*Rnf20<sup>fl/fl</sup>::Nkx2.5Cre<sup>-</sup>*) and mutant (*Rnf20<sup>fl/-</sup>::Nkx2.5Cre<sup>+</sup>*). Lower panels are higher magnification views of the ventricles. (D) Immunofluorescent staining for NKX2.5 (red), RNF20 (green), and CD31-endocardium (white) in e10.5 wild-type (*Rnf20<sup>fl/fl</sup>::Nkx2.5Cre<sup>-</sup>*) and mutant (*Rnf20<sup>fl/-</sup>::Nkx2.5Cre<sup>+</sup>*) mouse hearts. Corrected Total Cell Fluorescence (CTCF) for RNF20 in the compact myocardium is given.



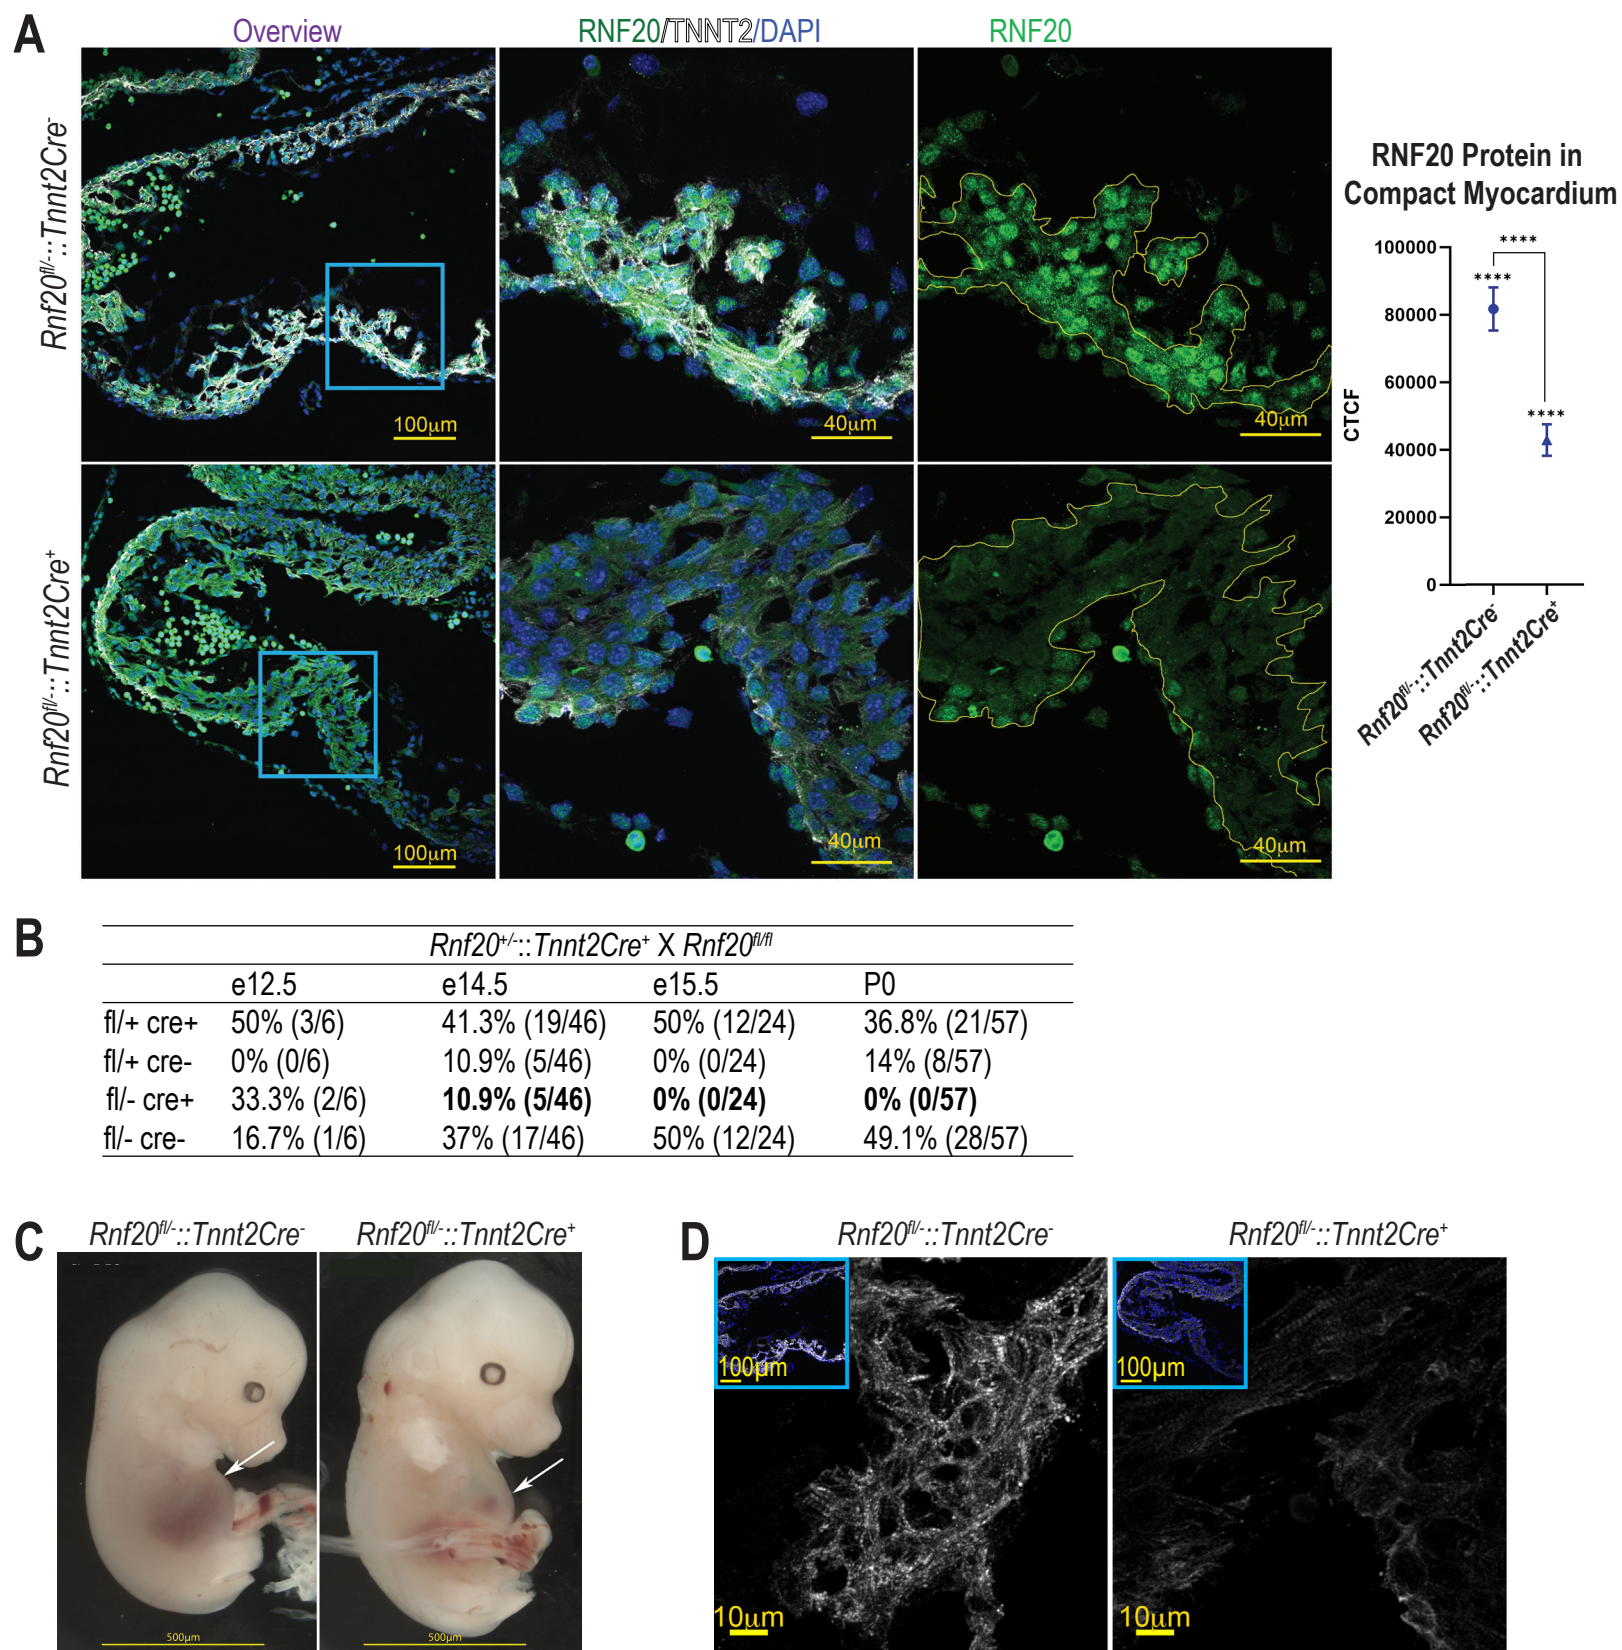

**Fig. S4. Phenotype of *Rnf20* conditional mutants (*Tnnt2Cre*).** (A) Immunofluorescent staining for TNNT2 (white) and RNF20 (green) in e10.5 wild-type (*Rnf20<sup>fl/+</sup>::Tnnt2Cre<sup>+</sup>*) and mutant (*Rnf20<sup>fl/-</sup>::Tnnt2Cre<sup>+</sup>*) mouse hearts. A – atria, LV – left ventricle, RV – right ventricle. Corrected Total Cell Fluorescence (CTCF) for RNF20 in the compact myocardium is given. (B) Percent of each genotype of e12.5, e14.5, e15.5, and P0 from the cross of *Rnf20<sup>fl/fl</sup>* and *Rnf20<sup>fl/+</sup>::Tnnt2Cre<sup>+</sup>*. (C) Pictures of e14.5 wild-type (*Rnf20<sup>fl/+</sup>::Tnnt2Cre<sup>+</sup>*) and mutant (*Rnf20<sup>fl/-</sup>::Tnnt2Cre<sup>+</sup>*) mouse embryos. (D) Immunofluorescent staining for TNNT2-myocardium (white) in e10.5 wild-type (*Rnf20<sup>fl/-</sup>::Tnnt2Cre<sup>-</sup>*) and mutant (*Rnf20<sup>fl/-</sup>::Tnnt2Cre<sup>+</sup>*) mouse hearts. The same embryos are depicted in Figures S4a and S4d.



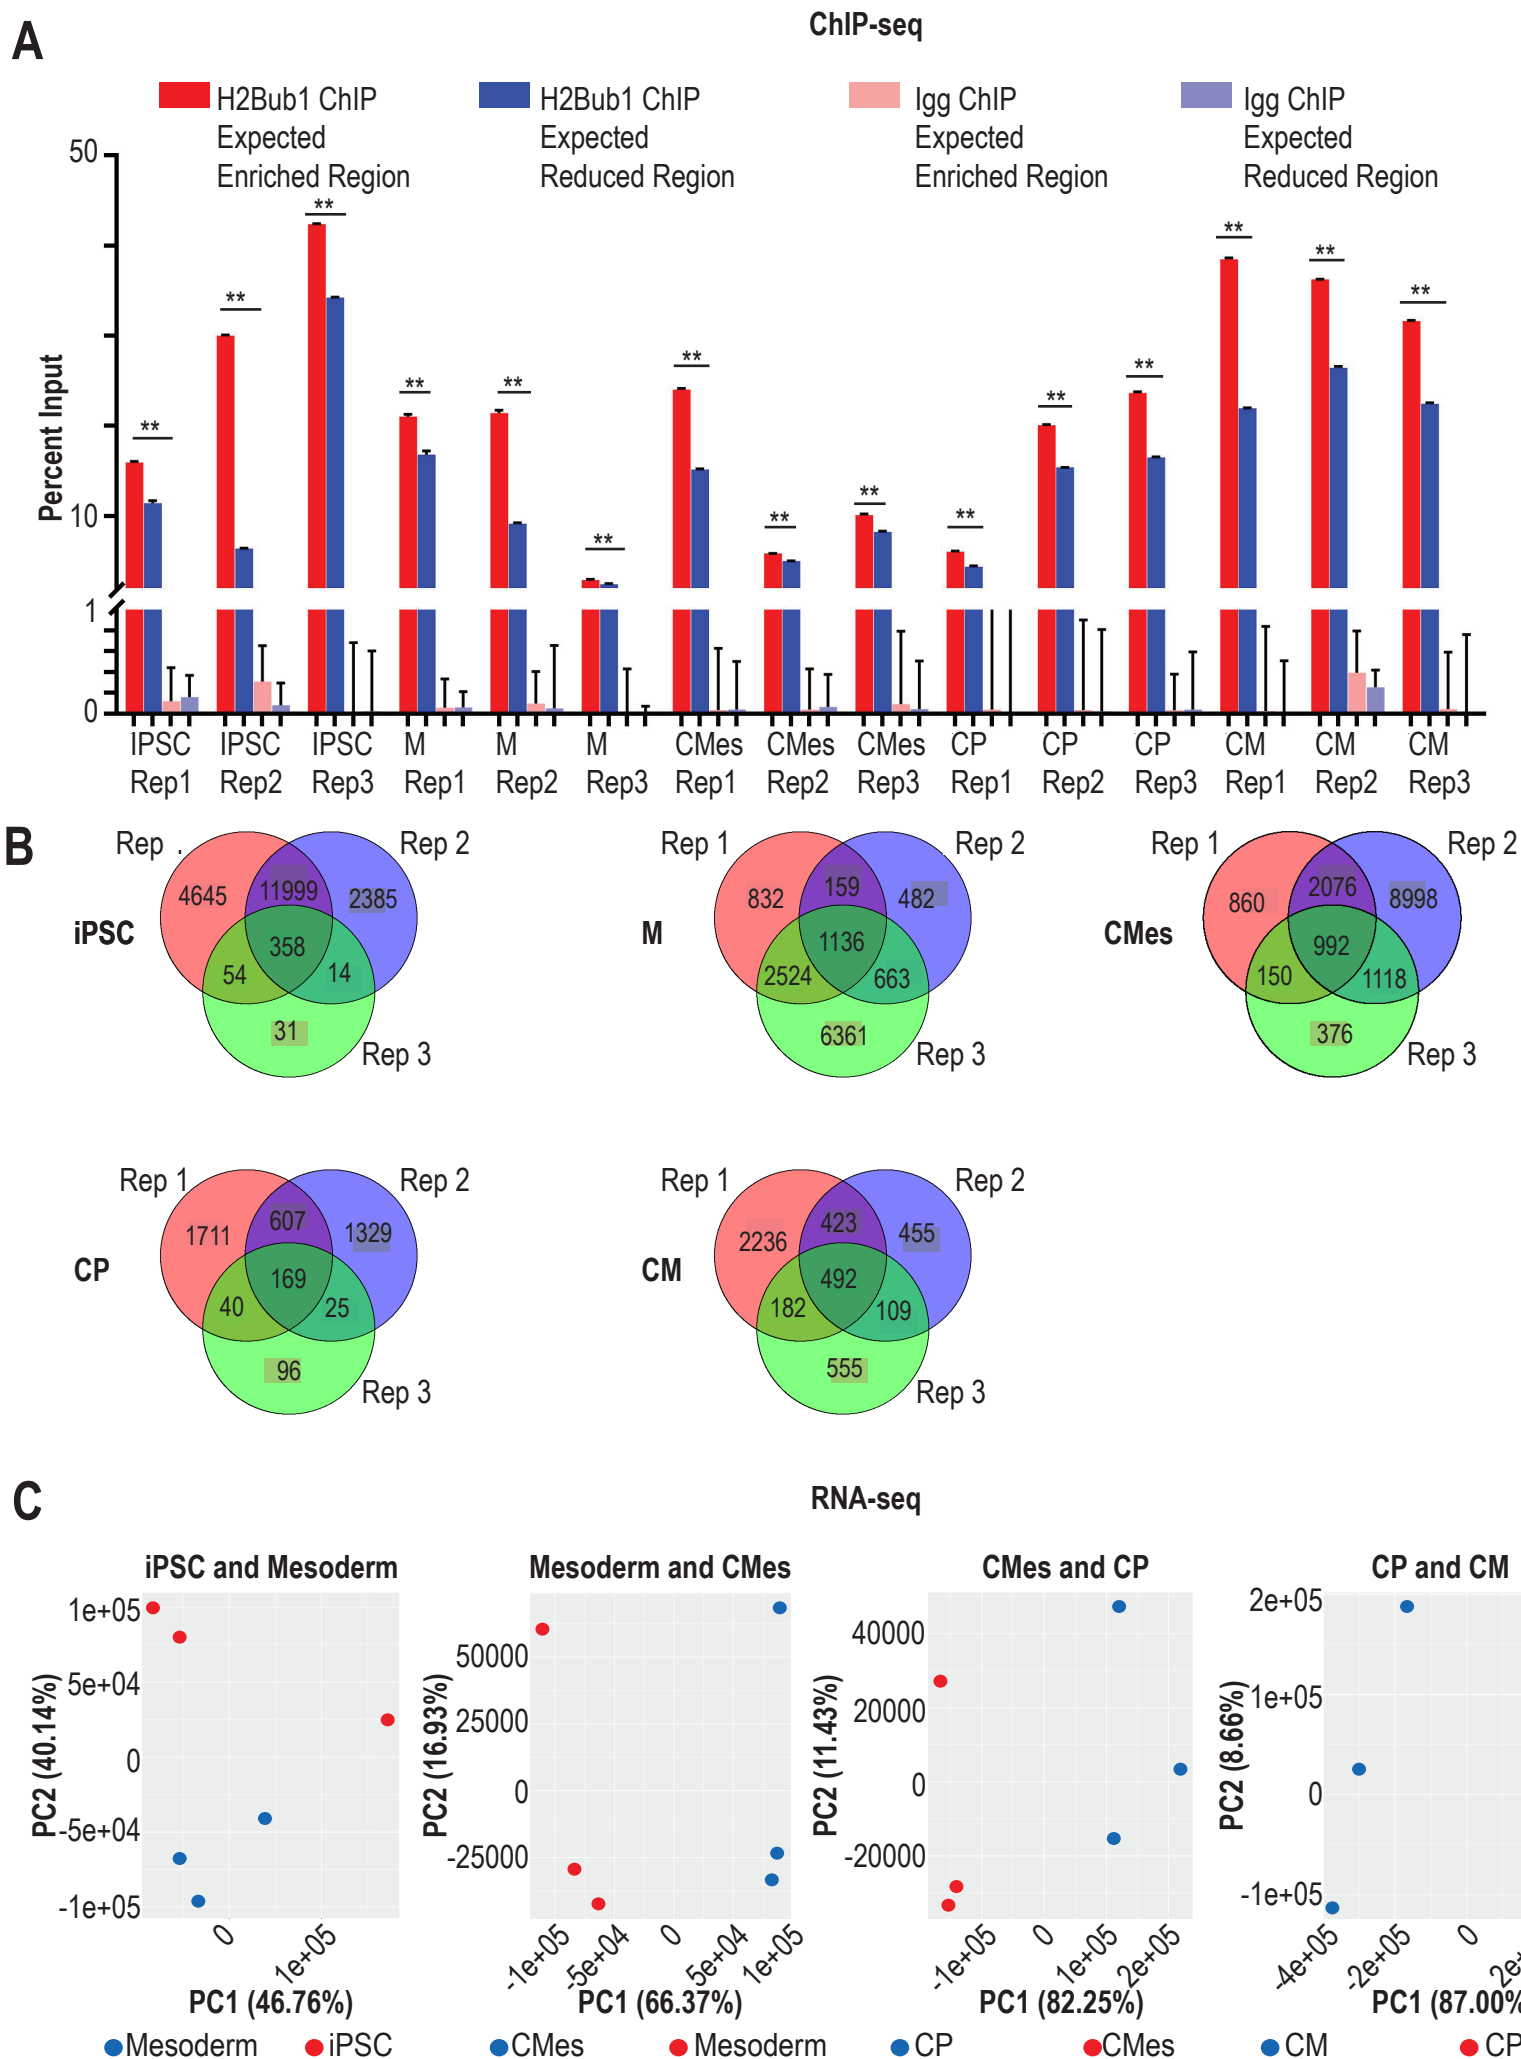

**Fig. S5. WT ChIP-seq and RNA-seq Quality Control.** (A) Percent input for a region that is known to be enriched in H2Bub1 (GAPDH promoter) and in a region that is known to be reduced in H2Bub1 (GAPDH gene body) for all of the H2Bub1 and Igg ChIP experiments. Data are shown as mean  $\pm$  SD (n = 3). Dark red represents H2Bub1 ChIP in the expected enriched region (GAPDH promoter), dark blue represents H2Bub1 ChIP in the expected reduced region (GAPDH gene), light red represents Igg ChIP in the expected enriched region (GAPDH promoter), and light blue represents Igg ChIP in the expected reduced region (GAPDH gene). Unpaired 1-tailed t-test, \*\* P < 0.01. (B) Common and unique genes with peak calls across the three replicates (Replicate 1 is in red, replicate 2 is in purple, and replicate 3 is in green) in five stages of CM differentiation (iPSC, mesoderm (M), cardiac mesoderm (CMes), cardiac progenitor (CP), and cardiomyocyte (CM)). (C) PCA plots of RNA-seq experiments of CM differentiation comparing all neighboring stages (iPSC (red) v mesoderm (M) (blue), M (red) v CMes (blue), CMes (red) v CP (blue), and CP (red) v CM (blue)) for three replicates of each stage.



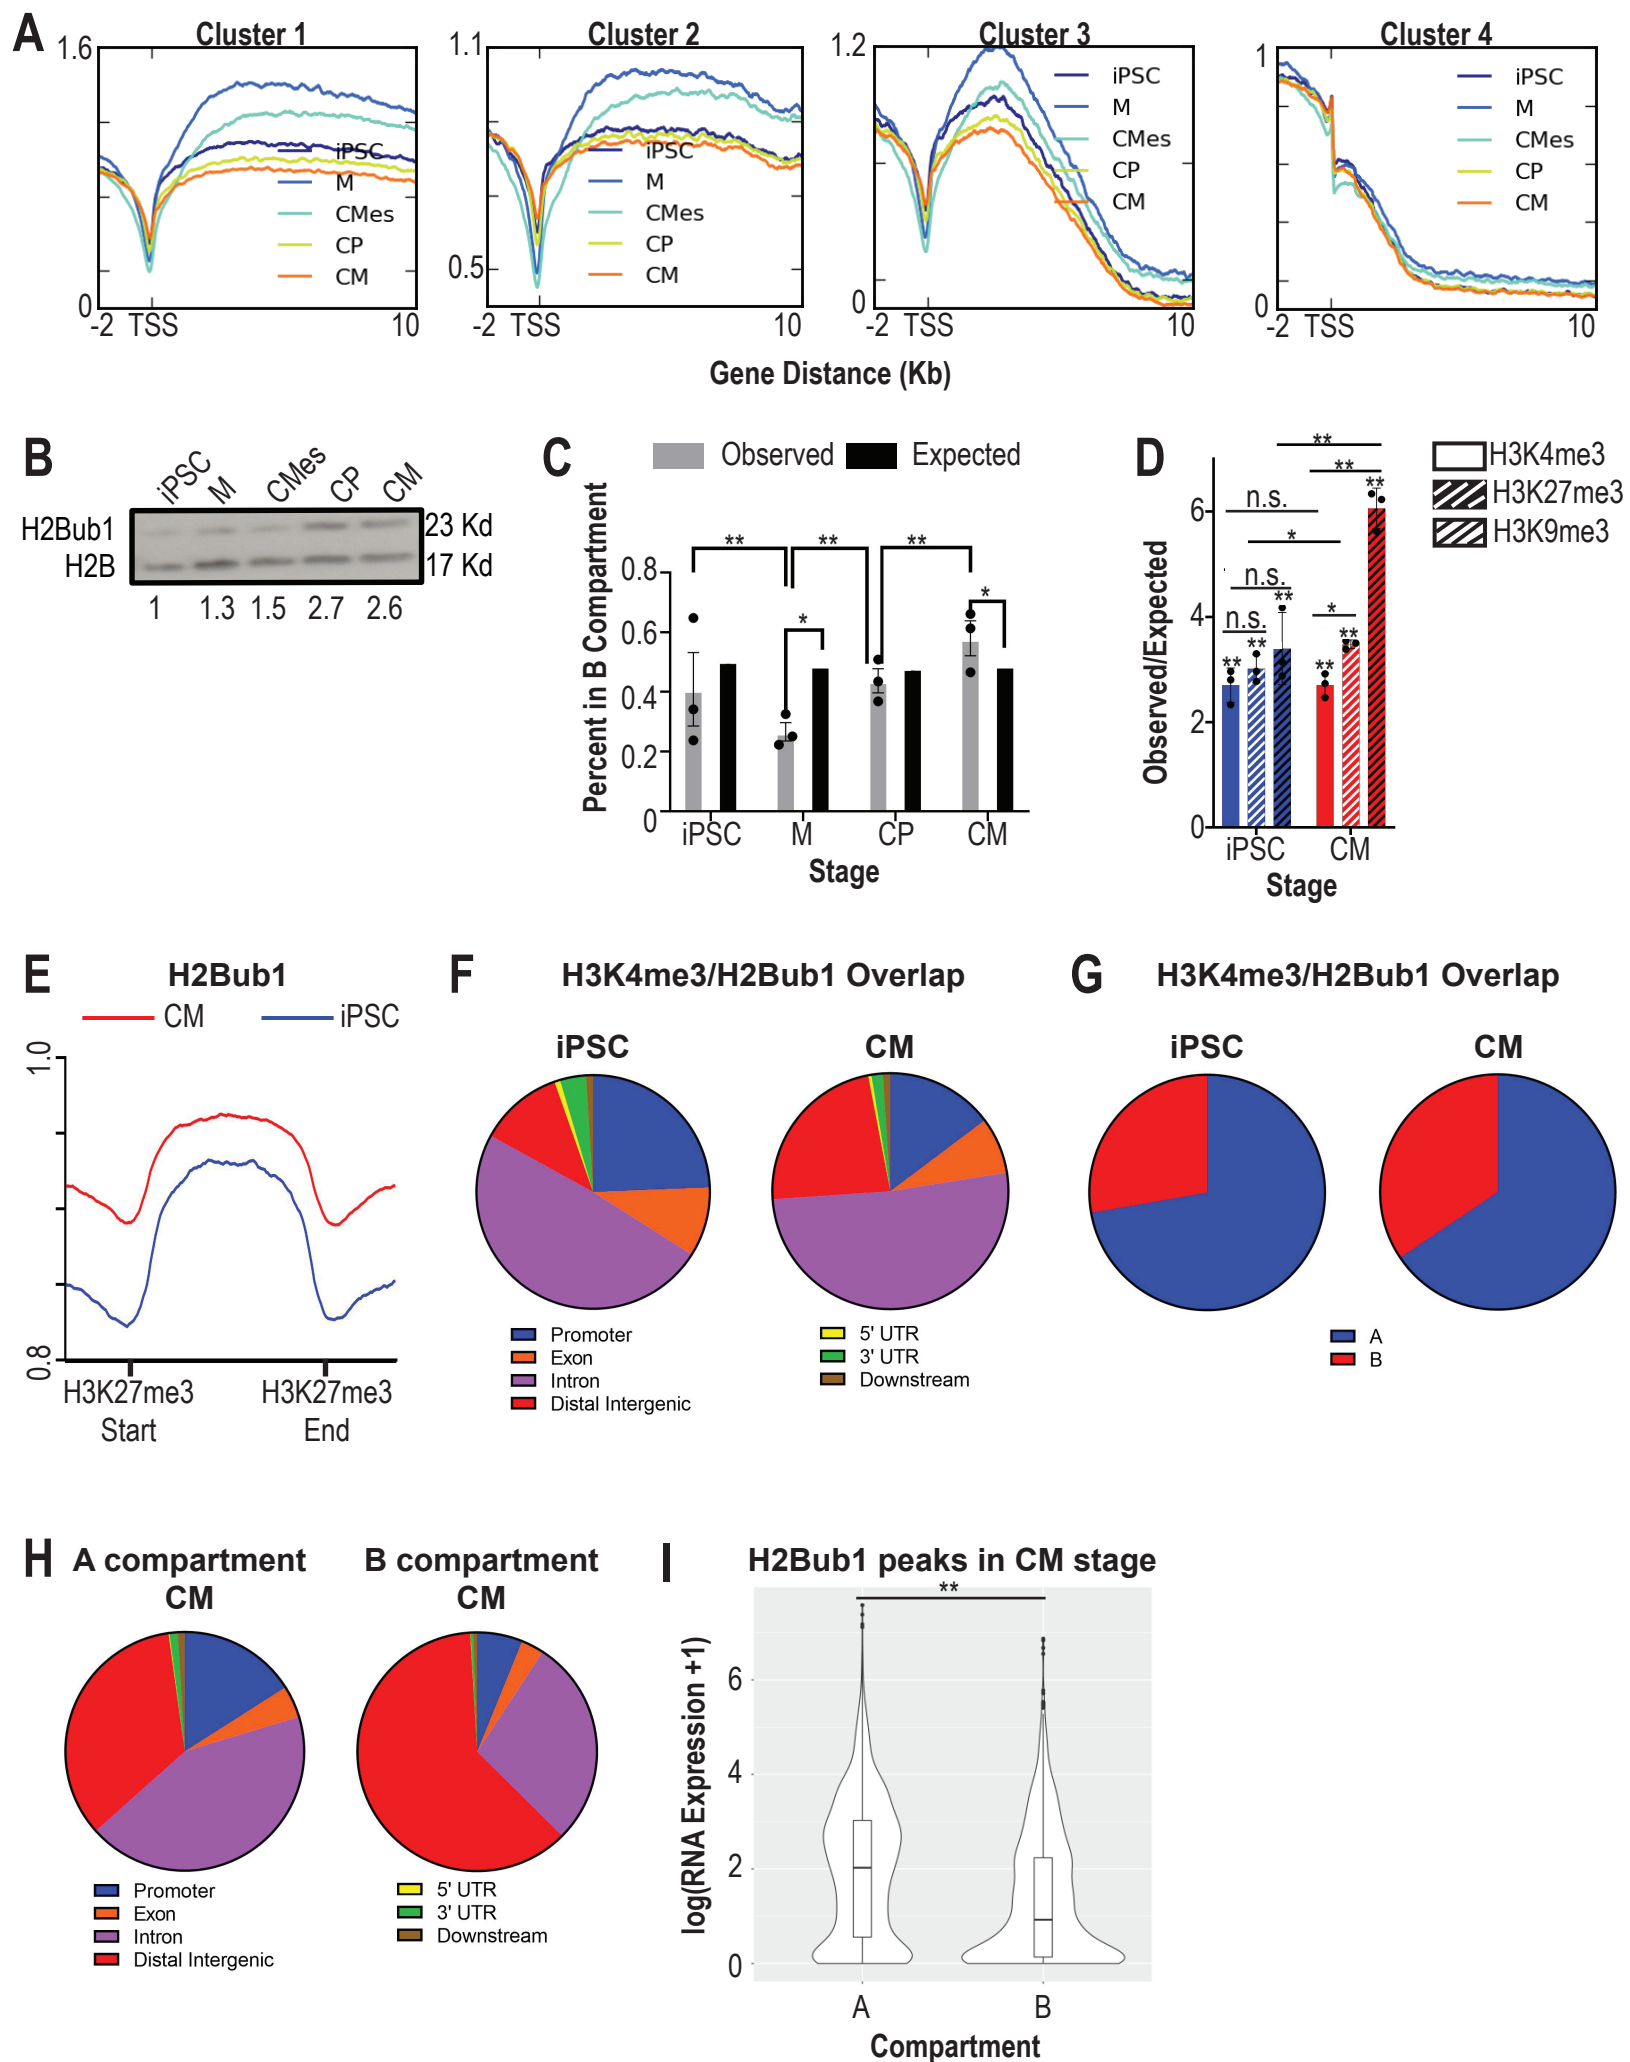

**Fig. S6. H2Bub1 is located in the heterochromatic regions.** (A) Graphs of the four clusters identified in Figure 3A across five stages of CM differentiation (iPSC, Mesoderm (M), Cardiac Mesoderm (CMes), Cardiac Progenitor (CP), and Cardiomyocyte (CM)). Cluster 1 indicates high H2Bub1 levels, cluster 2 indicates low H2Bub1 levels, cluster 3 indicates moderate H2Bub1 levels, and cluster 4 indicates no H2Bub1. (B) Western blot for H2Bub1 in five stages of CM differentiation (iPSC, M, CMes, CP, and CM). The loading control for H2Bub1 is H2B. Numbers indicate average quantification (imageJ) of H2Bub1 normalized to H2B over two replicates. (C) Percent of H2Bub1 peaks overlapping with the B compartment in each stage of CM differentiation (iPSC, M, CP, and CM) comparing observed (gray) and expected (black) values. Data are shown as mean  $\pm$  SEM (n = 3). P-values comparing observed and expected values were manually calculated by comparing the actual values to the expected values, \* p < 0.05, \*\* P < 0.01 (see Materials and Methods). P-values comparing observed values between stages were calculated by computing a z score, \* p < 0.05, \*\* P < 0.01. (D) Percent of H2Bub1 peaks on the same gene as an activating chromatin mark (H3K4me3 shown in solid bars) and two repressive chromatin marks (H3K27me3 shown in bars with white dashes and H3K9me3 with black dashes) in iPSCs and CMs. Data are the ratio of observed to expected values. Data are shown as mean  $\pm$  SEM (n = 3). P-values comparing observed values to expected values were calculated by Chi Square tests and adjusted for multiple comparisons, \* p < 0.05, \*\* P < 0.01. P-values comparing observed values between stages were calculated using an unpaired 2-tailed, heteroscedastic t-test, \* p < 0.05, \*\* P < 0.01, N.S. is non-significant. (E) H2Bub1 occupancy over H3K27me3 peaks in iPSCs (blue) and CMs (red). (F-G) Peak annotations (F) and Compartment information (G) for the H2Bub1 peaks on the same gene as H3K4me3. (H) Peak annotations for H2Bub1 peaks in the A compartment and in the B compartment. (I) Expression levels (from RNA-seq) for genes with H2Bub1 peaks in the A compartment and in the B compartment. 2-tailed, Mann-Whitney test, \*\* p < 0.01.



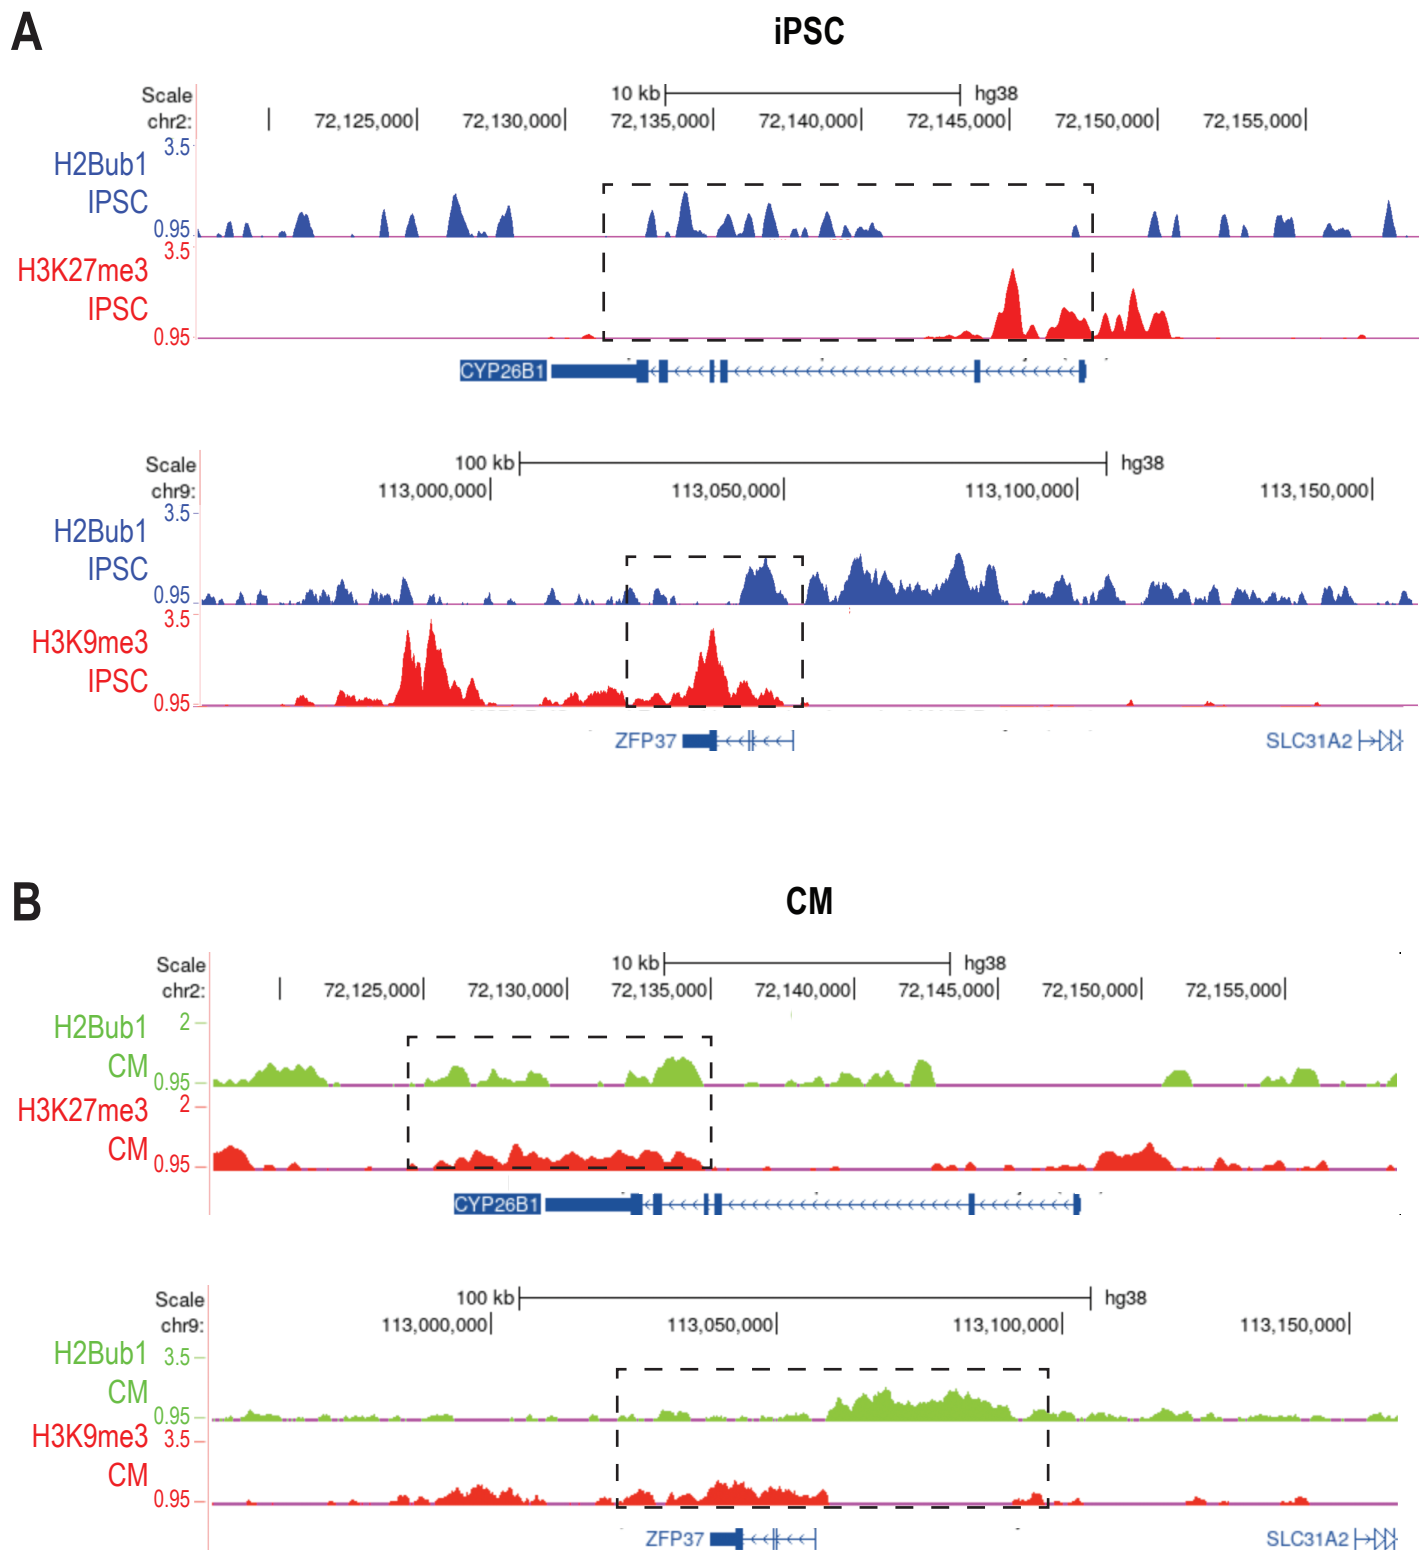

**Fig. S7. Example genes illustration H2Bub1 overlap with repressive chromatin marks.** Example H2Bub1 occupancy (iPSCs in blue in (A) and CMs in green in (B)), depicted using fold enrichment against random distribution, on the same gene as previously published H3K27me3 peaks (red) and previously published H3K9me3 peaks (red). Gene structure is indicated below the gene. The boxes highlight one gene that contains both H2Bub1 and H3K27me3 peaks and one gene that contains both H2Bub1 and H3K9me3 peaks.

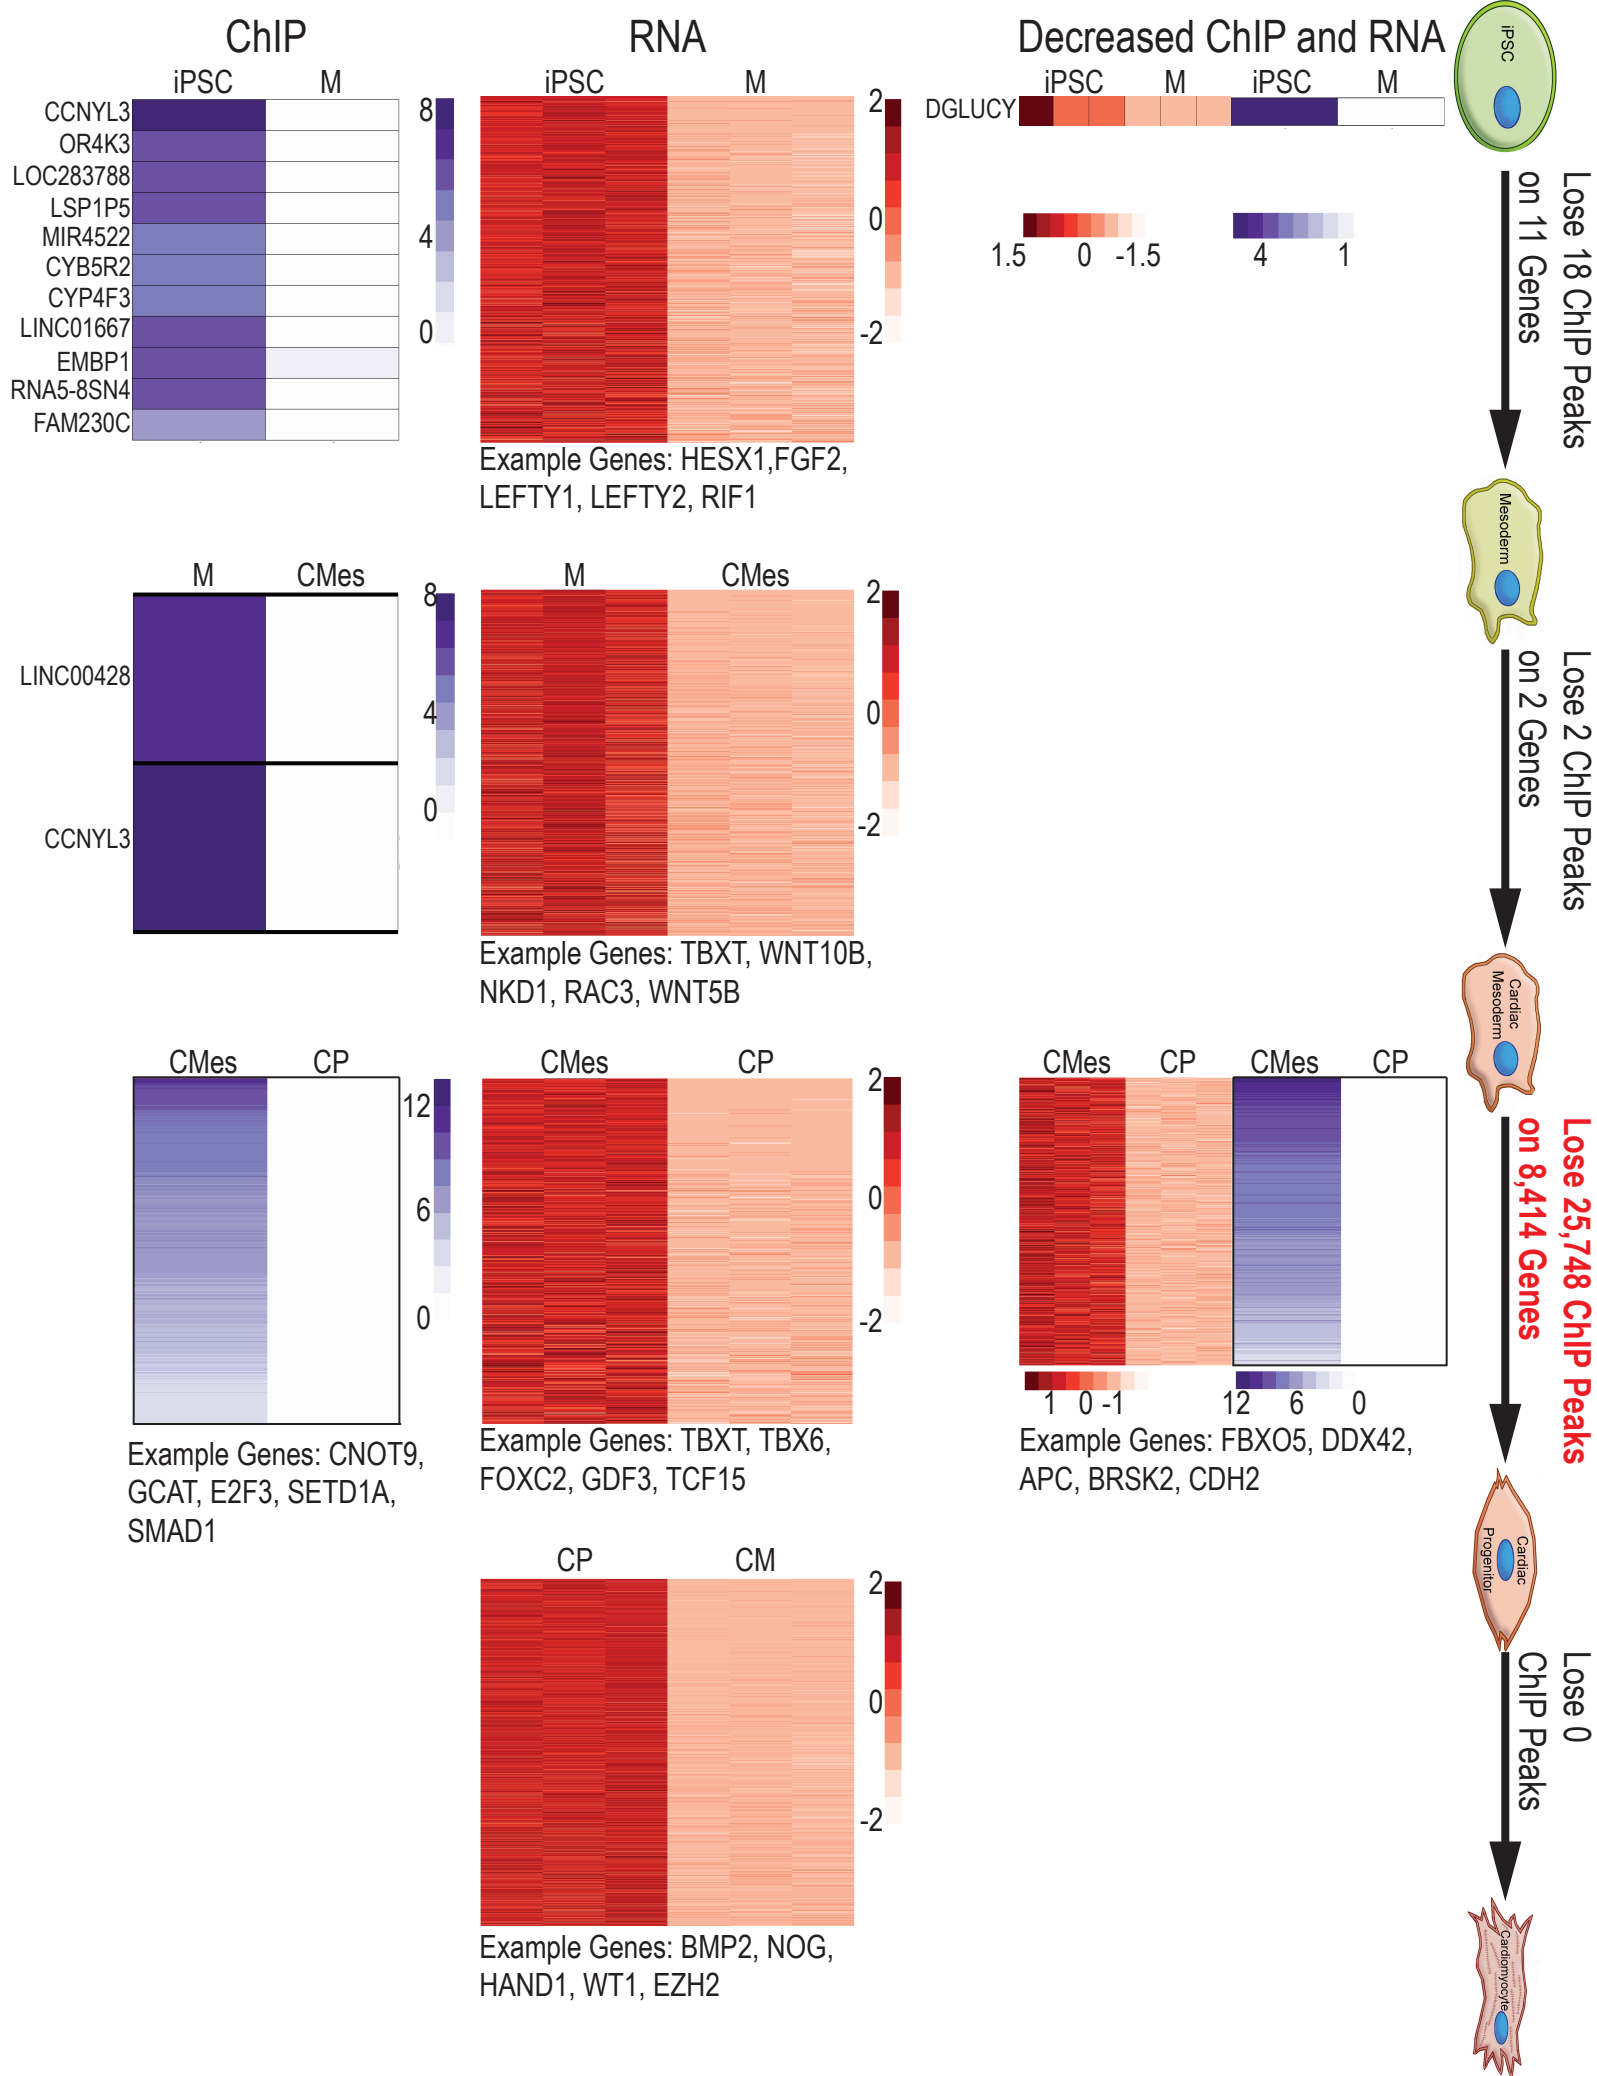



**Fig. S8. Genes with decreased H2Bub1 and RNA expression throughout cardiomyocyte differentiation.**

Heatmaps depicting the genes containing regions with decreased H2Bub1 occupancy, genes with decreased gene expression, and genes that have both decreased H2Bub1 occupancy and decreased gene expression when comparing iPSC and mesoderm (M), M and cardiac mesoderm (CMes), CMes and cardiac progenitor (CP), and CP and cardiomyocytes (CM). If there are less than 25 genes in a category, they are all listed. If there are more than 25 genes in a category, example genes are given below each heatmap. See supplemental data 1 and 2 for the complete list. The lost ChIP peaks were determined by a differential binding analysis for H2Bub1-ChIP-seq. There are 860 genes downregulated in M, 1364 genes downregulated in CMes, 1446 genes downregulated in CP, and 3141 genes downregulated in CM.

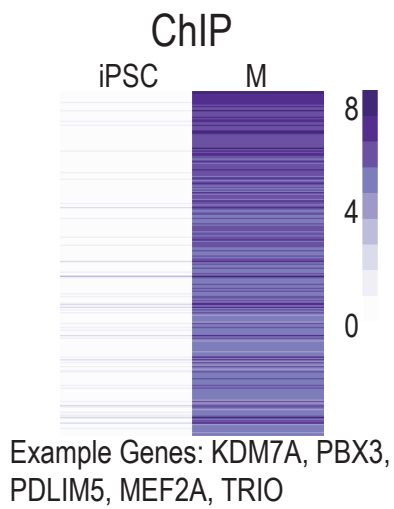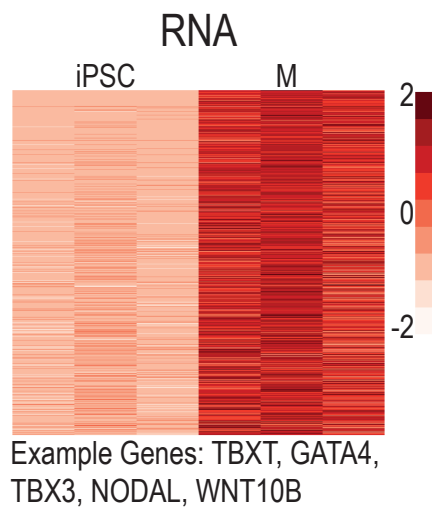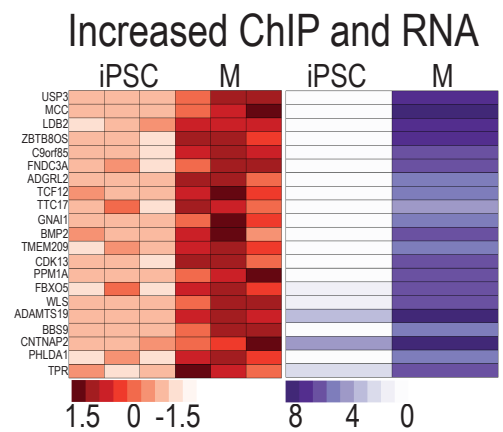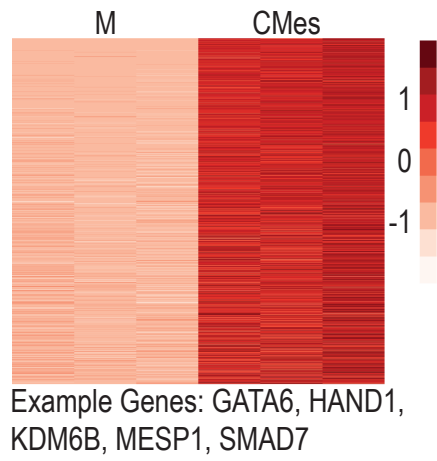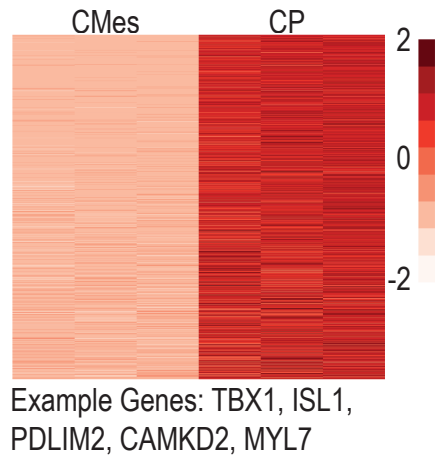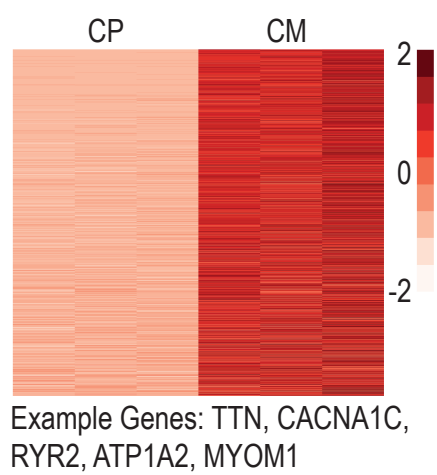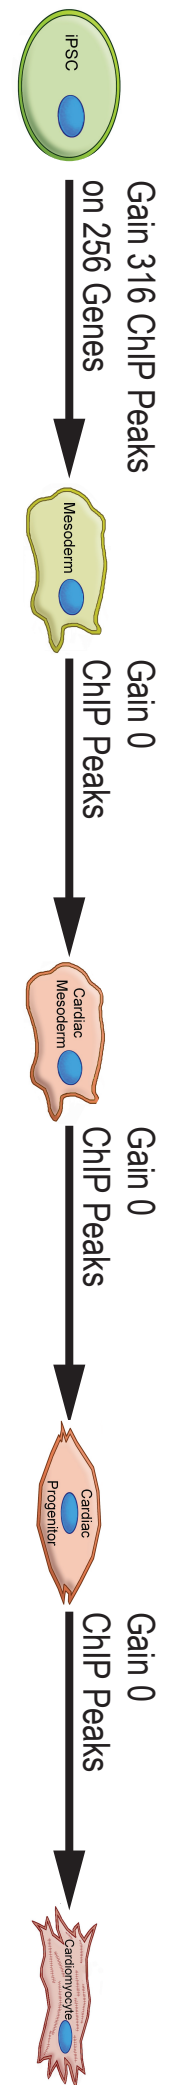



**Fig. S9. Genes with increased H2Bub1 and RNA expression throughout cardiomyocyte differentiation.**

Heatmaps depicting the genes containing regions with increased H2Bub1 occupancy, genes with increased gene expression, and genes that have both increased H2Bub1 occupancy and increased gene expression when comparing iPSC and mesoderm (M), M and cardiac mesoderm (CMes), CMes and cardiac progenitor (CP), and CP and cardiomyocytes (CM). If there are less than 25 genes in a category, they are all listed. If there are more than 25 genes in a category, example genes are given below each heatmap. See supplemental data 1 and 2 for the complete list. The gained ChIP peaks were determined by a differential binding analysis for H2Bub1-ChIP-seq. There are 648 genes upregulated in M, 1844 genes upregulated in CMes, 1704 genes upregulated in CP, and 3490 genes upregulated in CM.

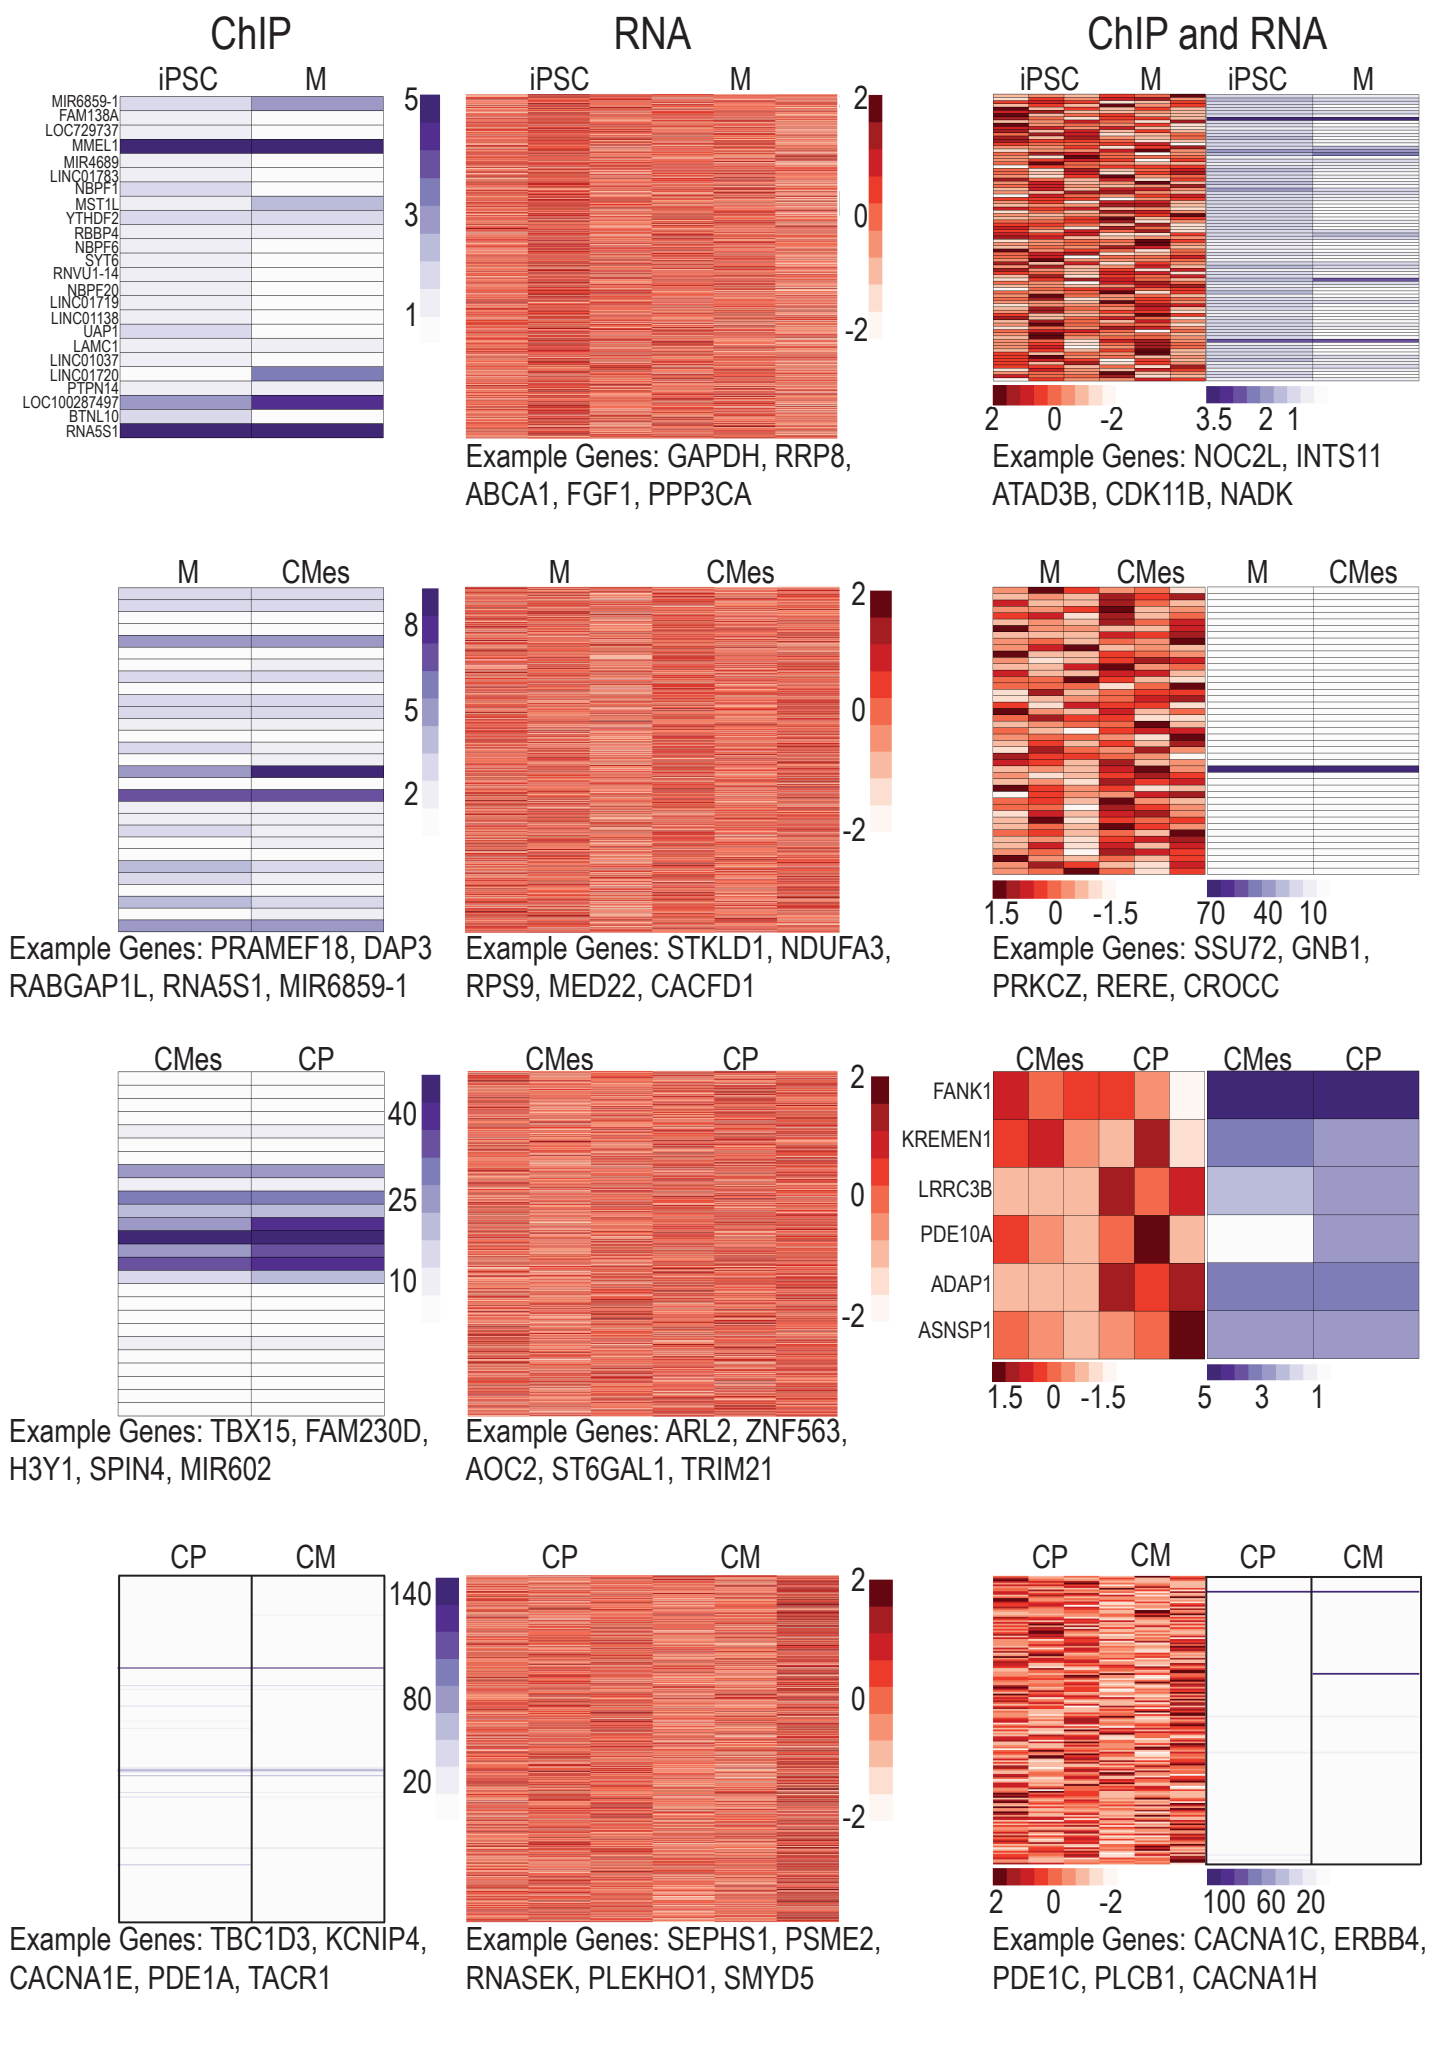

**Fig. S10. Genes with constant H2Bub1 and RNA expression throughout cardiomyocyte differentiation.**

Heatmaps depicting the genes containing regions with constant H2Bub1 occupancy, genes with constant gene expression, and genes that have both constant H2Bub1 occupancy and constant gene expression when comparing iPSC and mesoderm (M), M and cardiac mesoderm (CMes), CMes and cardiac progenitor (CP), and CP and cardiomyocytes (CM). If there are less than 25 genes in a category, they are all listed. If there are more than 25 genes in a category, example genes are given below each heatmap. See supplemental data 1 and 2 for the complete list. The constant CHIP peaks were determined by a differential binding analysis for H2Bub1-ChIP-seq.



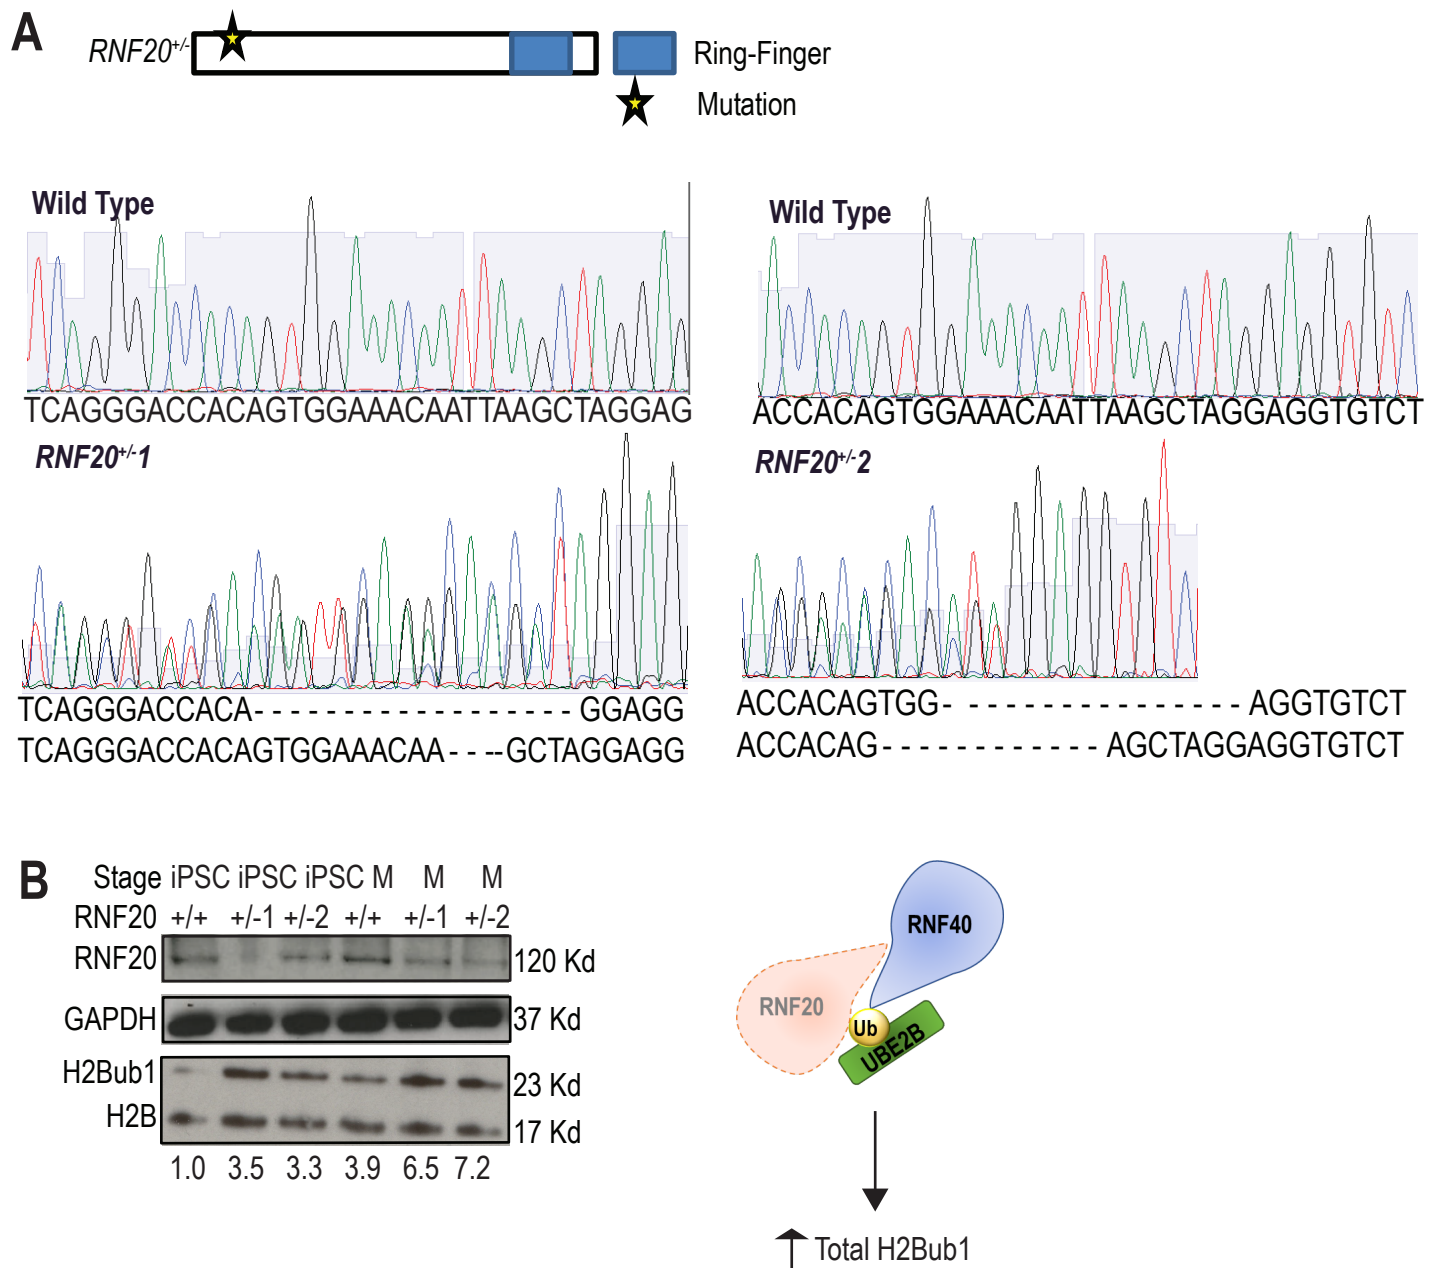

**Fig. S11. Characteristics of the *RNF20*<sup>+/-</sup> mutants.** (A) Diagram of the *RNF20* protein with its domains (Ring-Finger domain is shown in blue) and where the created *RNF20* mutations are located (with a star). Lower four panels are sequencing traces of the wild-type and two independent *RNF20*<sup>+/-</sup> iPSC lines demonstrating CRISPR-generated mutations. (B) Western blot for *RNF20* and H2Bub1 in two stages of CM differentiation (iPSC and Mesoderm (M)). The loading control for *RNF20* is GAPDH and for H2Bub1 is H2B. Numbers indicate average quantification (imageJ) of H2Bub1 normalized to H2B over three replicates. Next to the western blot is a H2Bub1-deposition complex schematic illustrating the *RNF20*<sup>+/-</sup> iPSC mutant, which leads to increased total H2Bub1 levels.

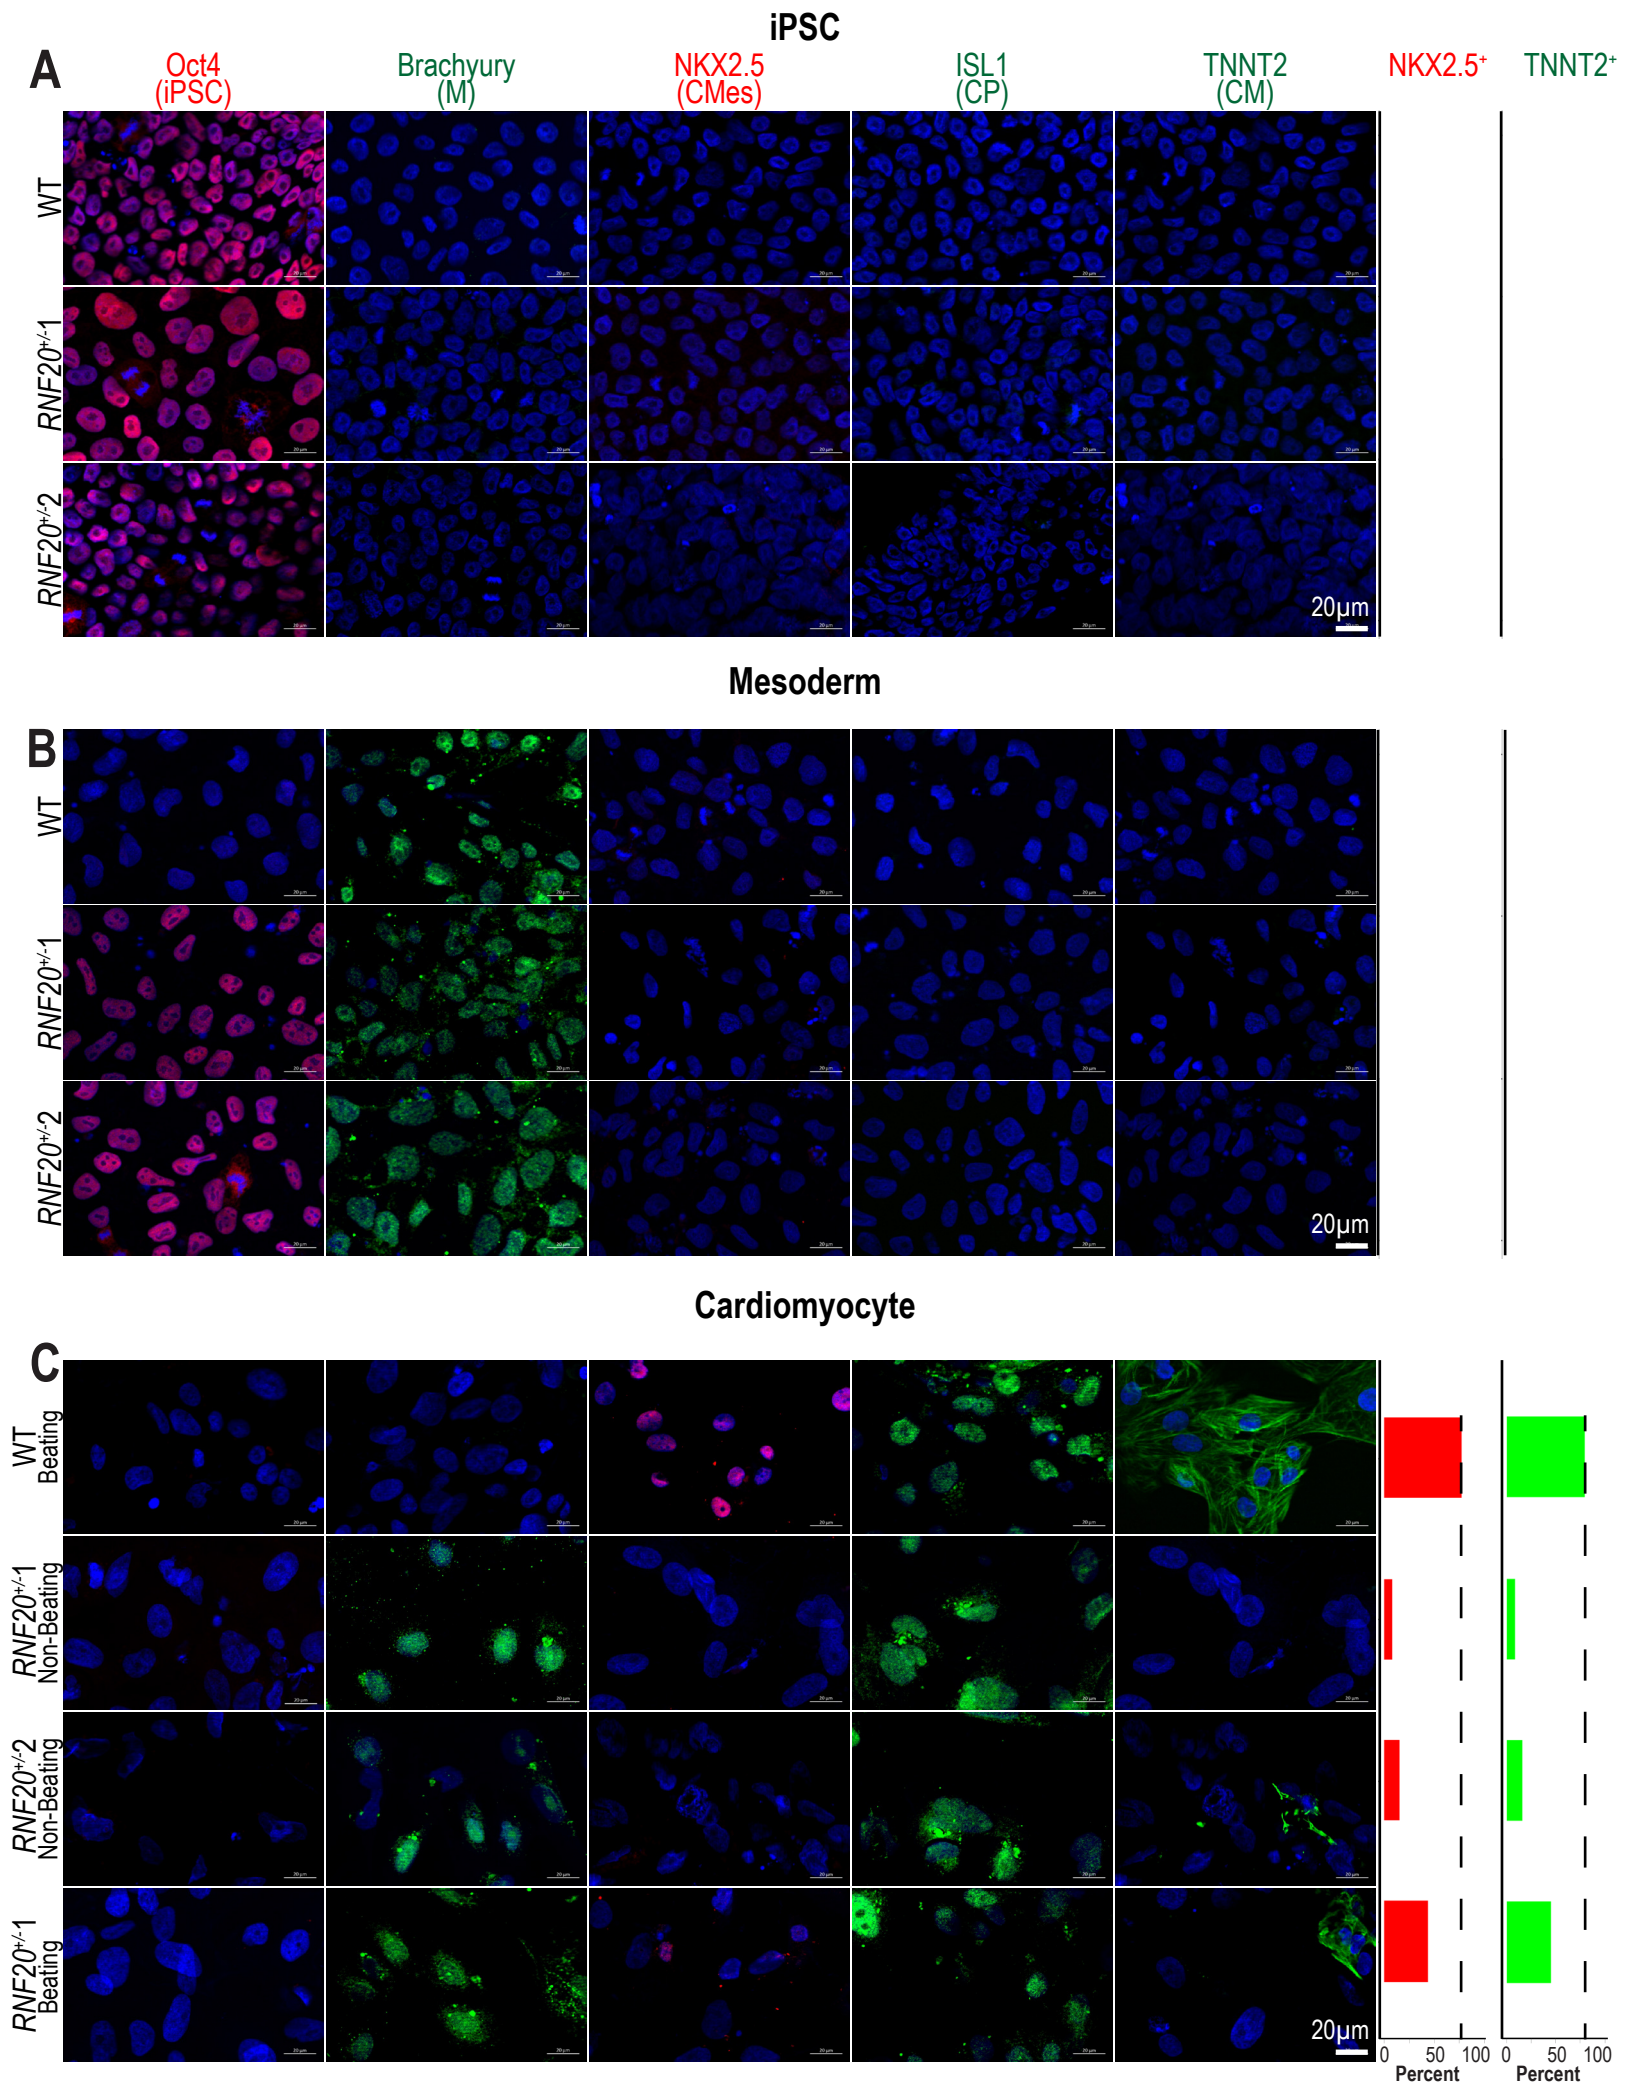

**Fig. S12. Differentiation trajectory for *RN20*<sup>+/-</sup> mutants.** Immunofluorescence staining for marker genes for each of five stages in CM differentiation (iPSC: OCT4 (red), mesoderm (M): Brachyury (green), cardiac mesoderm (CMes): NKX2.5 (red), cardiac progenitor (CP): ISL1 (green), and cardiomyocyte (CM): TNNT2 (green)) in the wild-type and both *RN20*<sup>+/-</sup> mutants at the iPSC stage (A), M stage (B) and CM stage (C). Since this immunofluorescence staining was done simultaneously with the immunofluorescence staining in Figure S14, the WT control images are reused in the figures. NKX2.5 and TNNT2 were assayed as a double labelling experiment. Since *RN20*<sup>+/-1</sup> forms beating CMs some of the time, staining was done for beating and non-beating samples at the CM stage. Quantification of the percent of cells that are NKX2.5<sup>+</sup> and TNNT2<sup>+</sup> are displayed next to the images (WT n = 232, *RNF20*<sup>+/-1</sup> Non-beating n = 227, *RNF20*<sup>+/-2</sup> Non-beating n = 212, *RNF20*<sup>+/-1</sup> Beating n = 225).

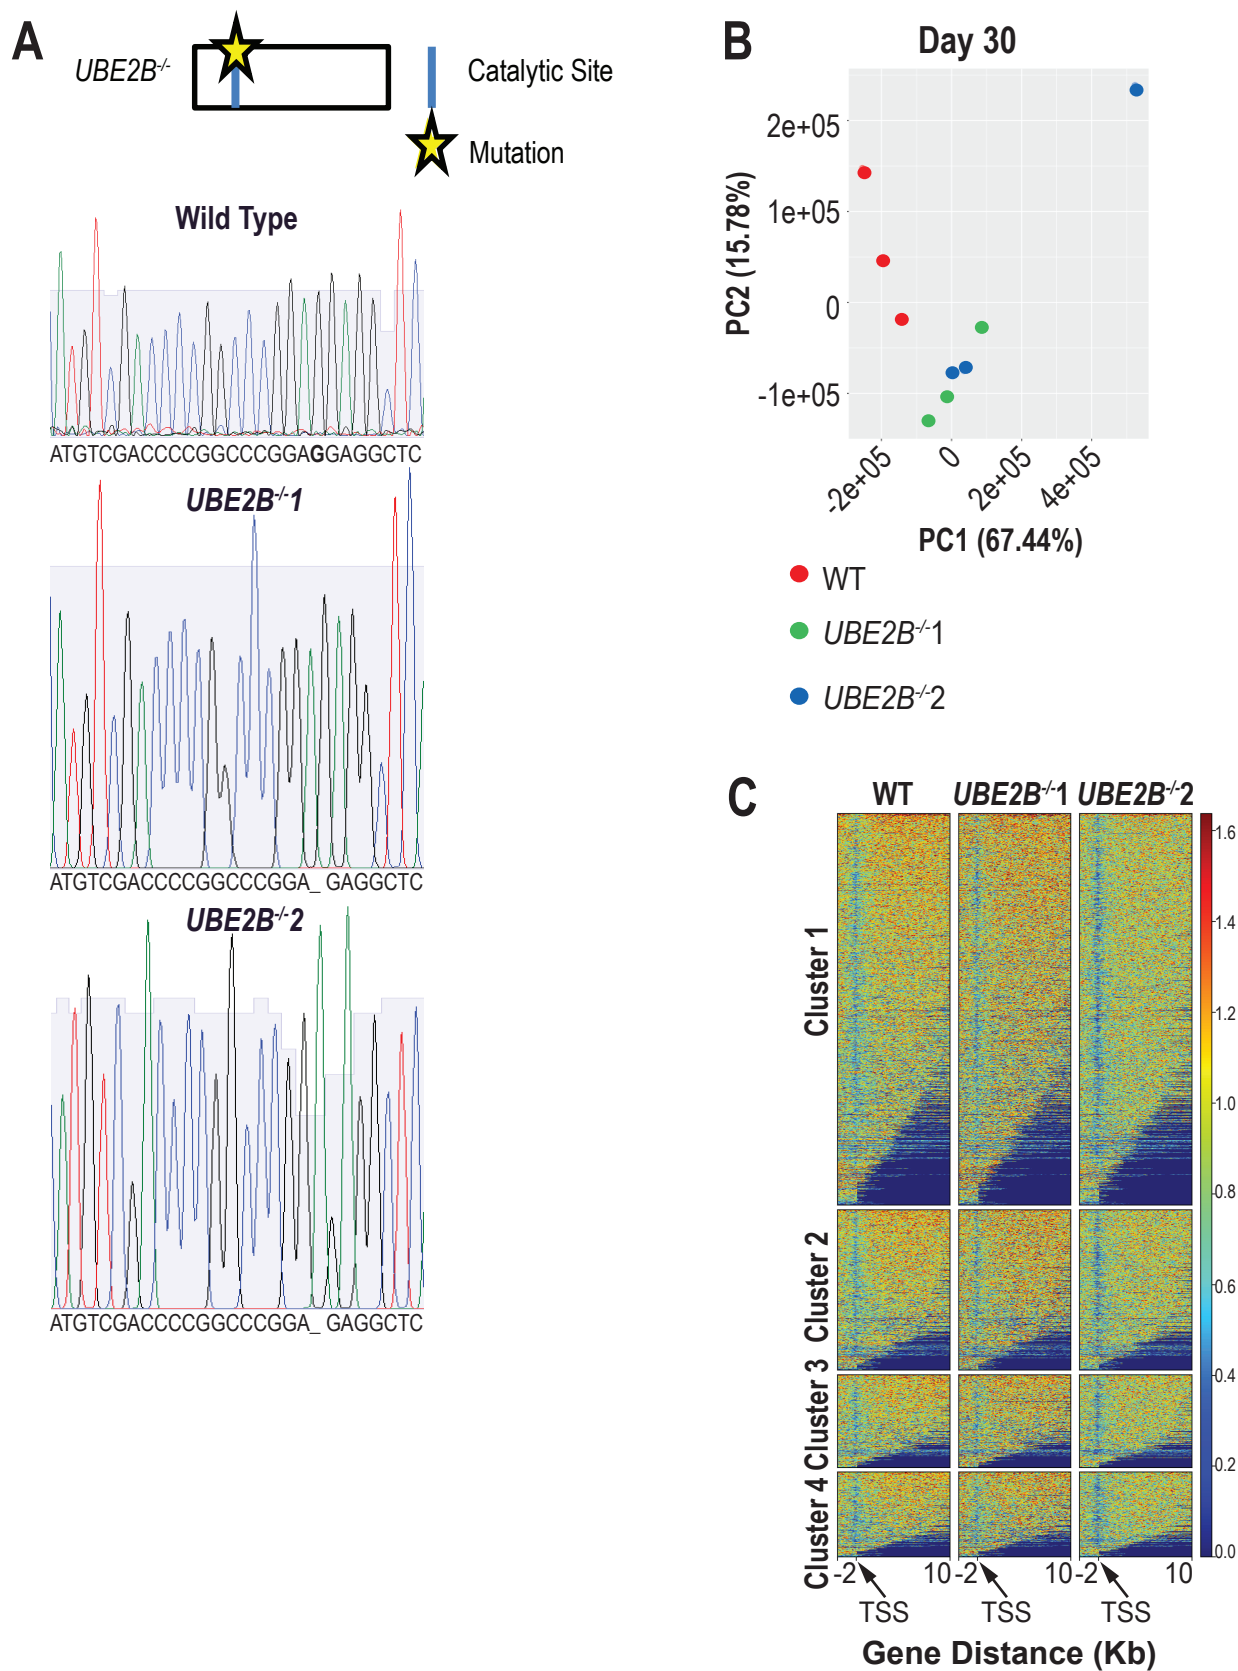

**Fig. S13. Characteristics of the *UBE2B*<sup>-/-</sup> mutant.** (A) Diagram of the *UBE2B* protein with its catalytic site, shown in blue, and where the created *UBE2B* mutations are located (with a star). Lower three panels are sequencing traces of the wild-type and two independent *UBE2B*<sup>-/-</sup> iPSC lines demonstrating CRISPR-generated mutations. (B) PCA plots of RNA-seq experiments comparing wild-type (red) and both *UBE2B*<sup>-/-</sup> mutants (green and blue) at the cardiomyocyte stage (n = 3). (C) H2Bub1 surrounding the transcriptional start site (TSS) (-2 Kb, +10 Kb) in the wild-type and *UBE2B*<sup>-/-</sup> mutants at the cardiomyocyte stage. Genes are grouped by H2Bub1 levels into four clusters. The average profile, depicted using fold enrichment against random distribution values, across this region for each cluster in each stage is shown as a heatmap. This represents the average of three replicates.



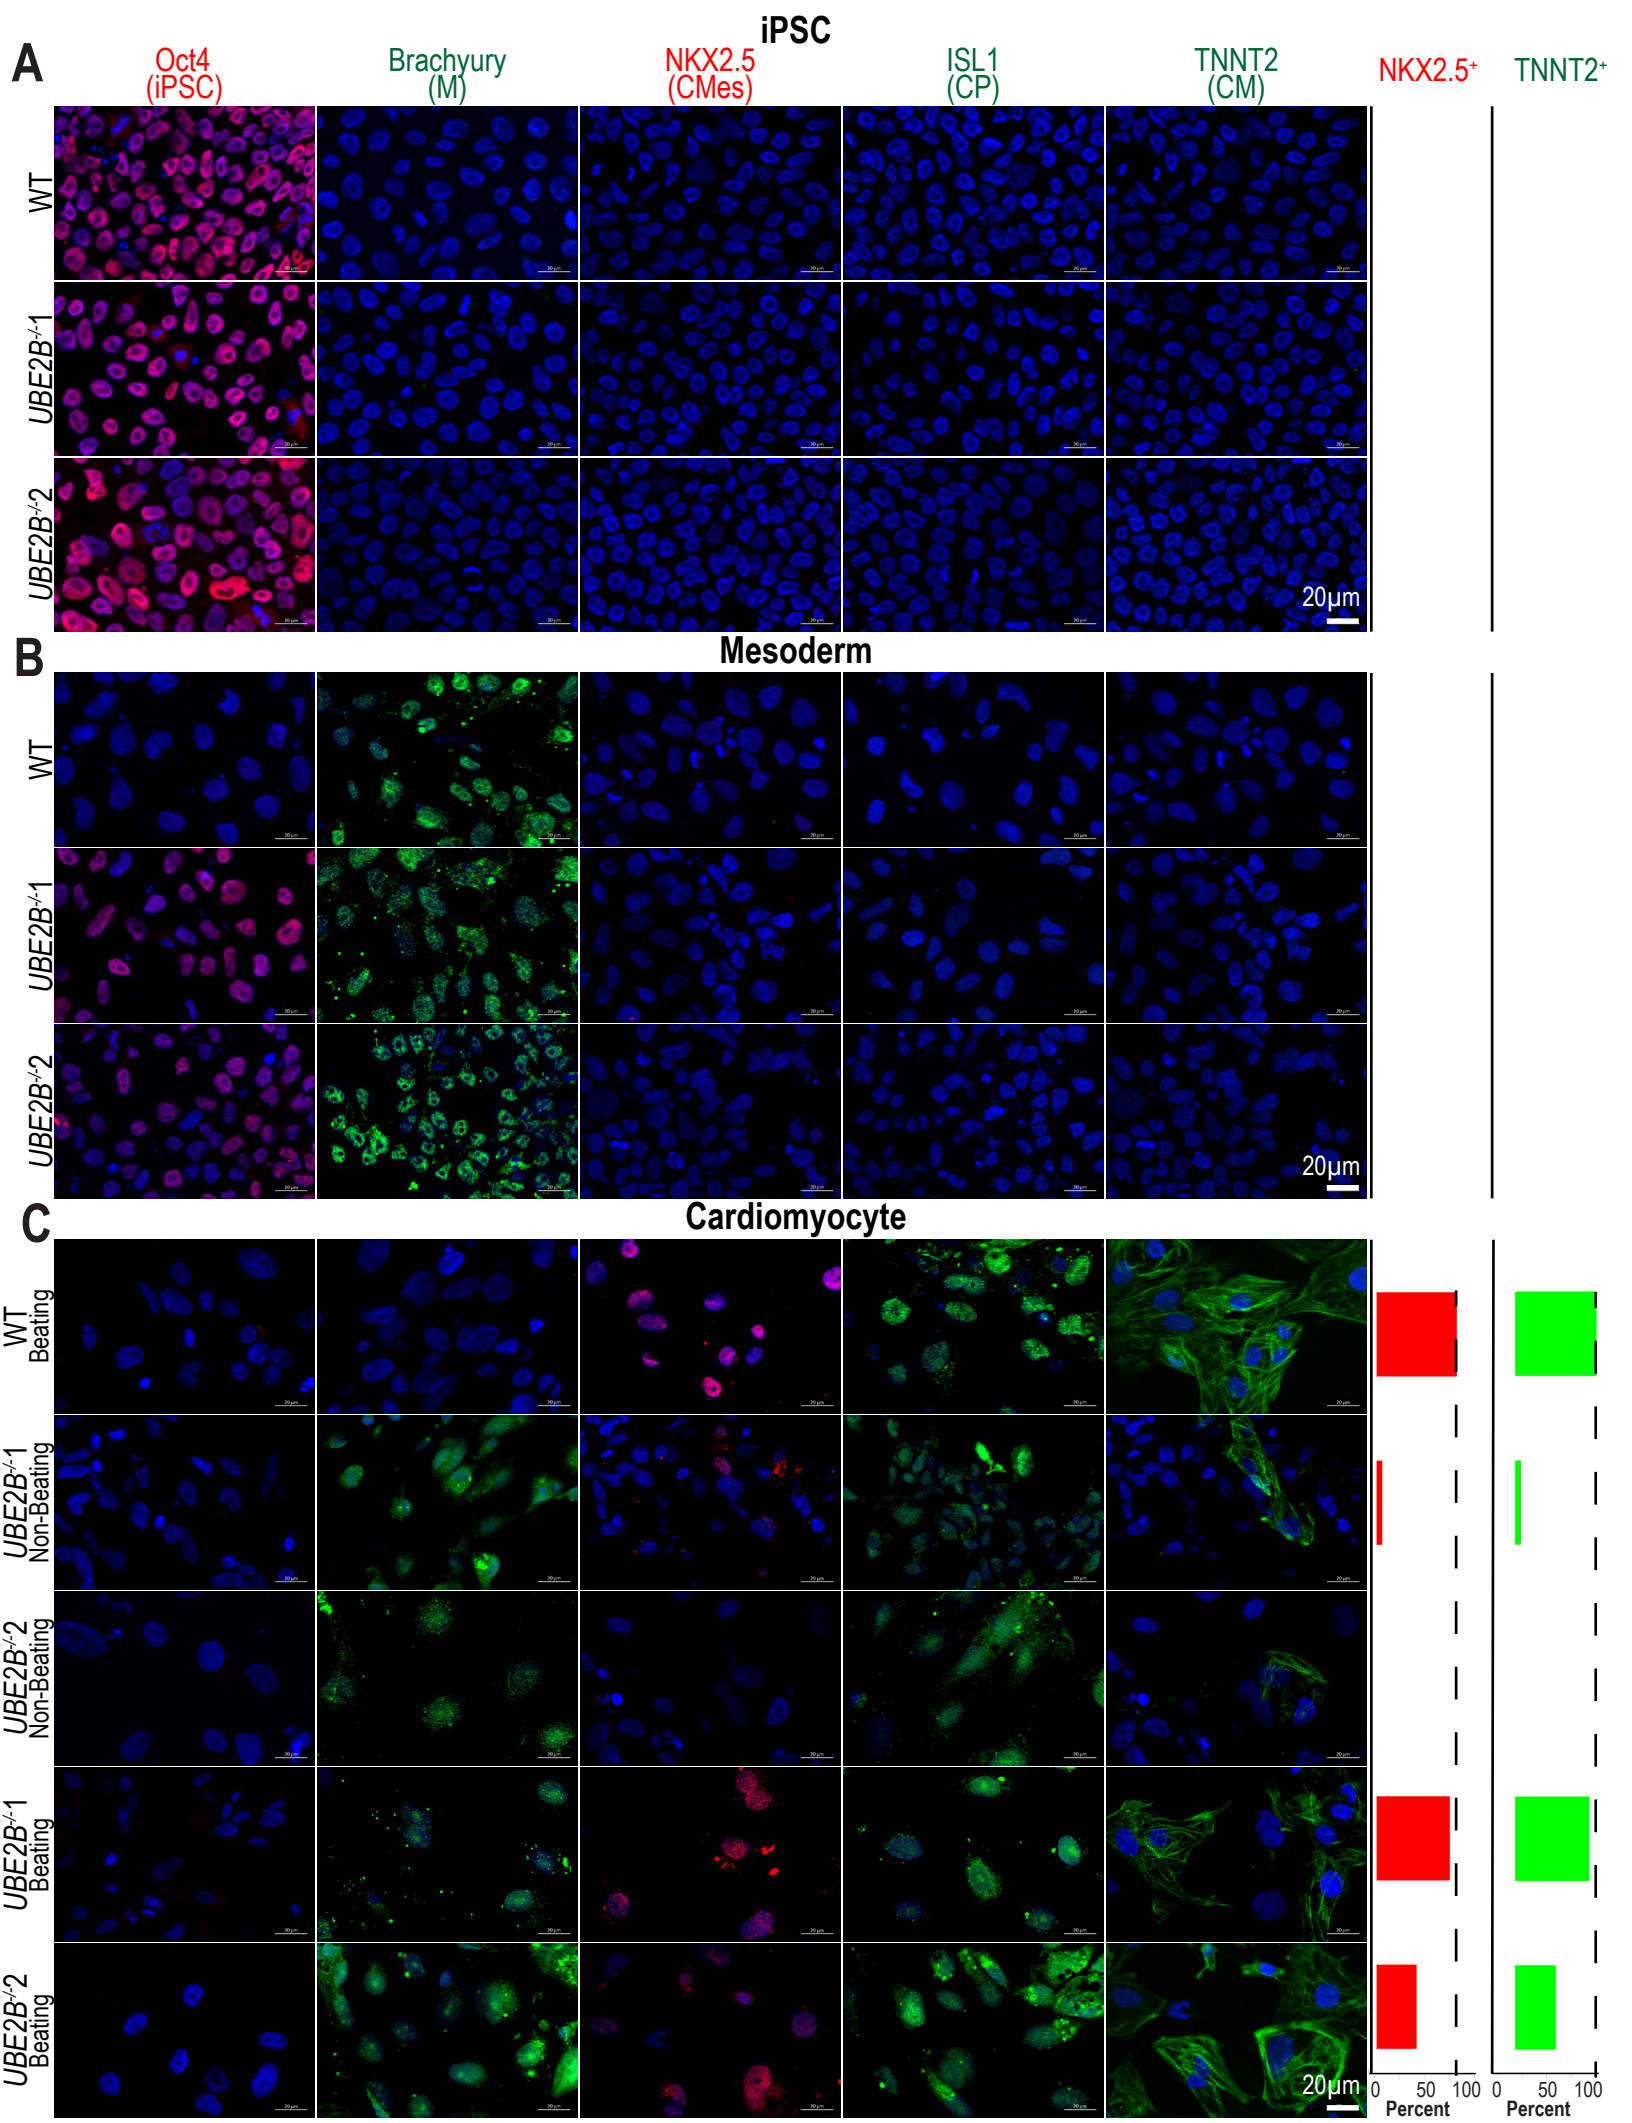

**Fig. S14. Differentiation trajectory for *UBE2B*<sup>-/-</sup> mutants.** Immunofluorescence staining for marker genes for each of five stages in CM differentiation (iPSC: OCT4 (red), mesoderm (M): Brachyury (green), cardiac mesoderm (CMes): NKX2.5 (red), cardiac progenitor (CP): ISL1 (green), and cardiomyocyte (CM): TNNT2 (green)) in the wild-type and both *UBE2B*<sup>-/-</sup> mutants at the iPSC stage (A), M stage (B), and CM stage (C). Since this immunofluorescence staining was done simultaneously with the immunofluorescence staining in Figure S12, the WT control images are reused in the figures. NKX2.5 and TNNT2 were assayed as a double labelling experiment. Since both mutants form beating CMs some of the time, staining was done for beating and non-beating samples at the CM stage. Quantification of the percent of cells that are NKX2.5<sup>+</sup> and TNNT2<sup>+</sup> are displayed next to the images (WT n = 232, *UBE2B*<sup>-/-1</sup> Non-beating n = 231, *UBE2B*<sup>-/-2</sup> Non-beating n = 232, *UBE2B*<sup>-/-1</sup> Beating n = 231, *UBE2B*<sup>-/-2</sup> Beating n = 230).

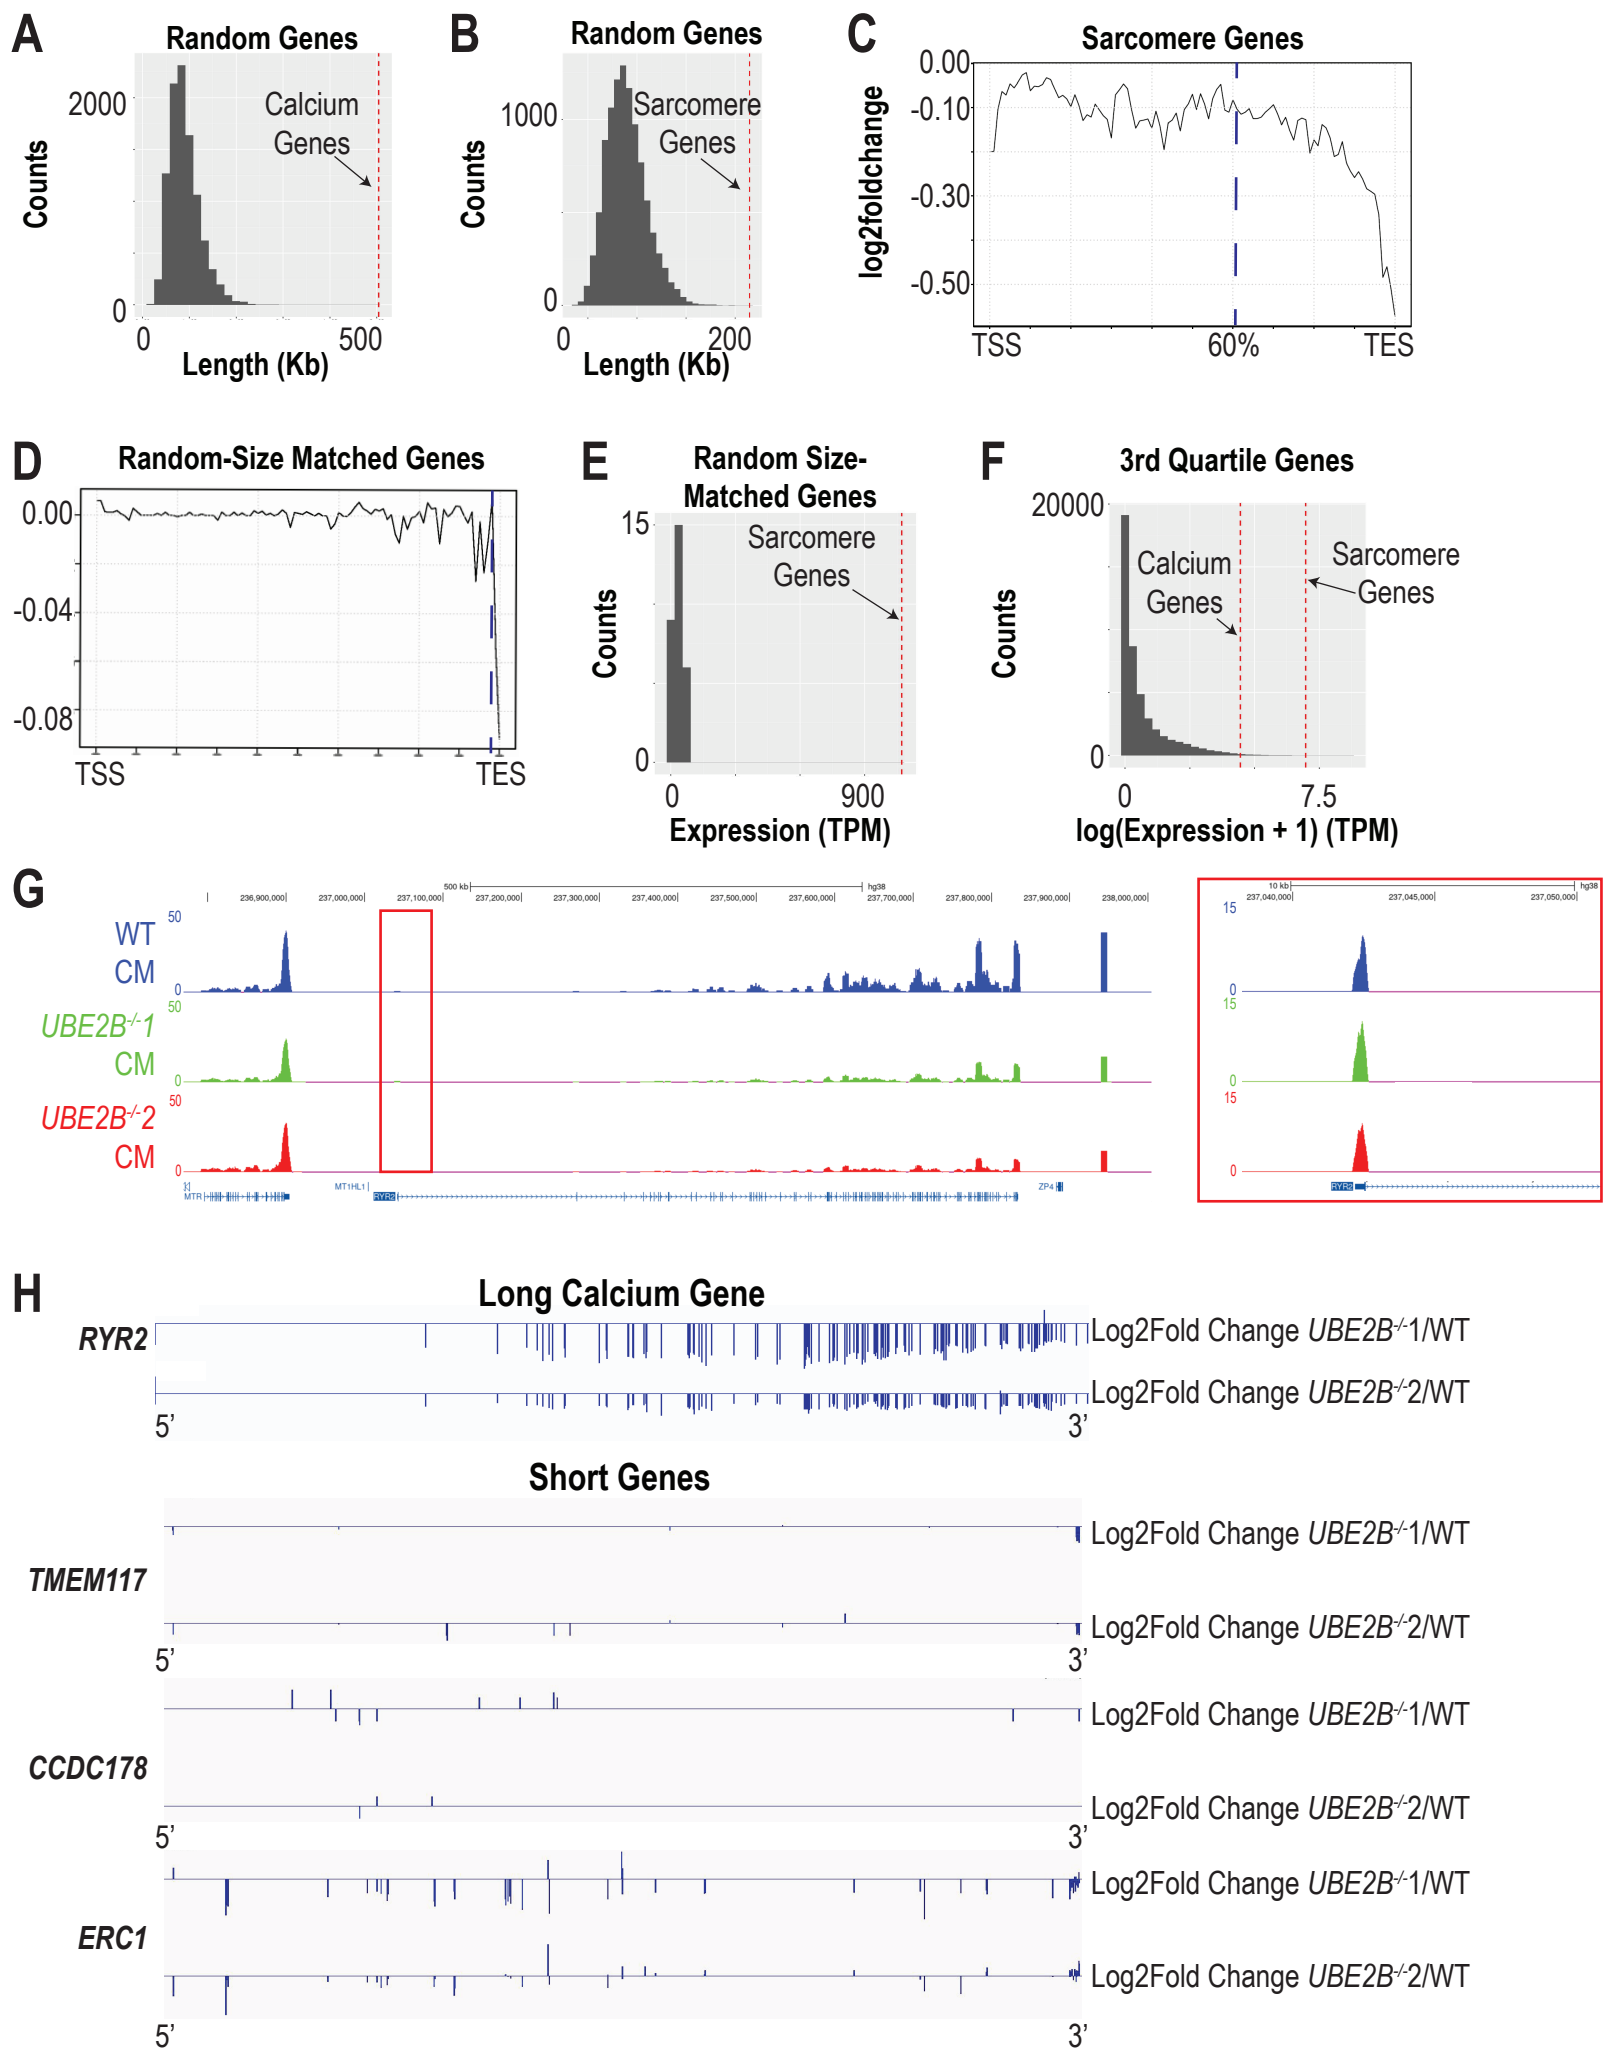

**Fig. S15. Amount of full-length transcript controls.** (A-B) Histograms showing the average length in Kb of each of 10,000 random quantity matched gene sets to the calcium and sarcomere gene sets. The vertical dashed red lines show the average length in Kb of the calcium genes (A) and the sarcomere genes (B). (C-D) Log<sub>2</sub> of fold change in transcript abundance between wild-type and *UBE2B*<sup>-/-</sup> mutants is shown at each position. The genes shown in (C) are the sarcomere genes (n = 70 genes) that are differentially expressed between wild-type and *UBE2B*<sup>-/-</sup> mutants (n = 3, for each of 2 cell lines). The genes shown in (D) are “randomly” selected quantity and size-matched genes to the sarcomere gene set (n = 3, for each of 2 cell lines). 30 “random” plots were created from the sarcomere gene set: 10 from genes that are upregulated between wild-type and both *UBE2B*<sup>-/-</sup> cell lines, 10 that are non-regulated between wild-type and both *UBE2B*<sup>-/-</sup> cell lines, and 10 that are down-regulated between wild-type and both *UBE2B*<sup>-/-</sup> cell lines. (E) A histogram showing the average expression in TPM of each of the “random” quantity and size-matched gene sets described in (D). The vertical dashed red line shows the average expression in TPM of the sarcomere genes. (F) A histogram showing the log average expression in TPM of all of the 3<sup>rd</sup> Quartile genes (greater than 33.940 Kb and less than 93.323 Kb). The vertical dashed red lines show the average expression in TPM of the calcium genes (left) and sarcomere genes (right). (G) Expression of an example calcium gene, *RYR2*, shown in Figure 5D. 5' on the left of the diagram (WT (blue), *UBE2B*<sup>-/-1</sup> (green), and *UBE2B*<sup>-/-2</sup> (red)). Zoom in of exon 1 (red box region) is shown on the right. (H) Example log<sub>2</sub> of fold change gene traces for one calcium gene (*RYR2*) and non-calcium short genes (*TMEM117*, *CCDC178* and *ERC1*). The short genes do not have accumulation of H2Bub1 near the center of the gene and do not have decreased full-length transcripts. 5' on the left of the diagram.



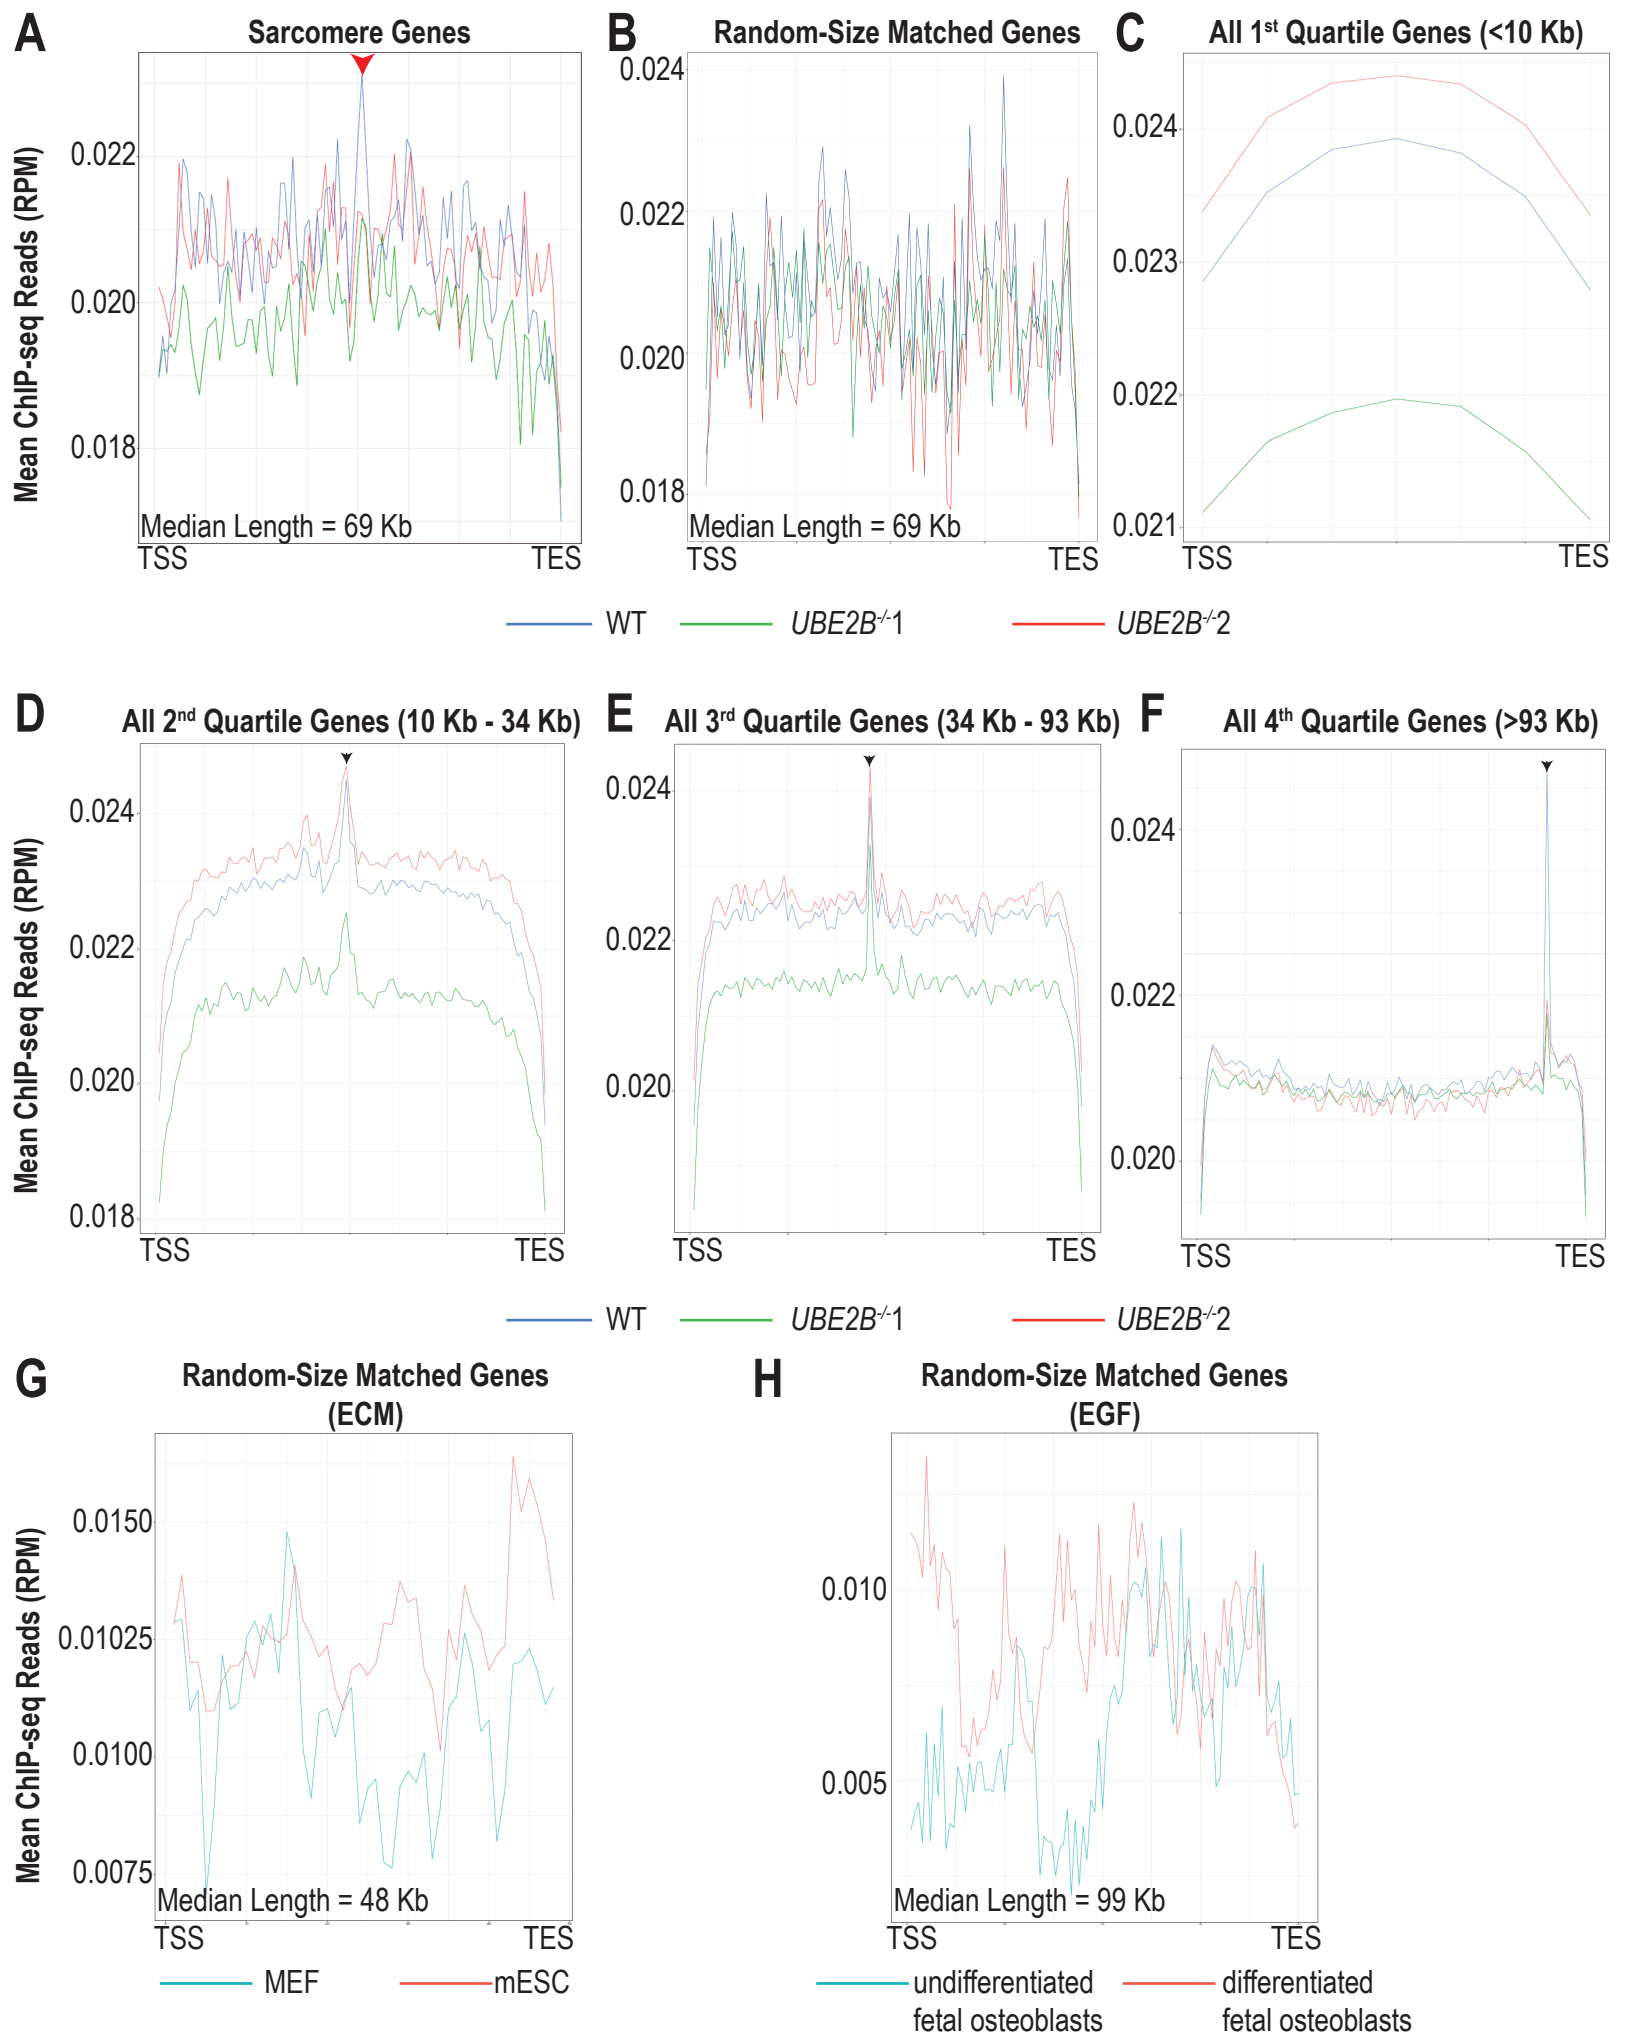

**Fig. S16. Metagene controls.** (A-F) Metagene plots for H2Bub1 levels in wild-type (blue) and *UBE2B*<sup>-/-</sup> mutants (green and red) (n = 3). The arrows indicate the accumulation near the center of the gene. The red arrow indicates UBE2B-dependent accumulation, while the black arrow indicates UBE2B-independent accumulation. The genes shown in (A) are the sarcomere genes described in Figure S15C and the genes shown in (B) are an example of a “random” quantity and size-matched gene set described in Figure S15D. The 1<sup>st</sup> quartile genes (less than 9.784 Kb) are shown in (C), the 2<sup>nd</sup> quartile genes (greater than 9.784 Kb and less than 33.940 Kb) are shown in (D), the 3<sup>rd</sup> quartile genes (greater than 33.940 Kb and less than 93.323 Kb) are shown in (E), and the 4<sup>th</sup> quartile genes (greater than 93.323 Kb) are shown in (F). (G) Example metagene plot for H2Bub1 levels in MEFs (teal) and mESCs (red) across “randomly” selected quantity and size-matched genes to the ECM gene set. 20 “random” metagene plots were created from the ECM gene set. (H) Example metagene plot for H2Bub1 levels in undifferentiated hFOBs (teal) and differentiated hFOBs (red) across “randomly” selected quantity and size-matched genes to the EGF related gene set. 20 “random” metagene plots were created from the EGF related gene set.

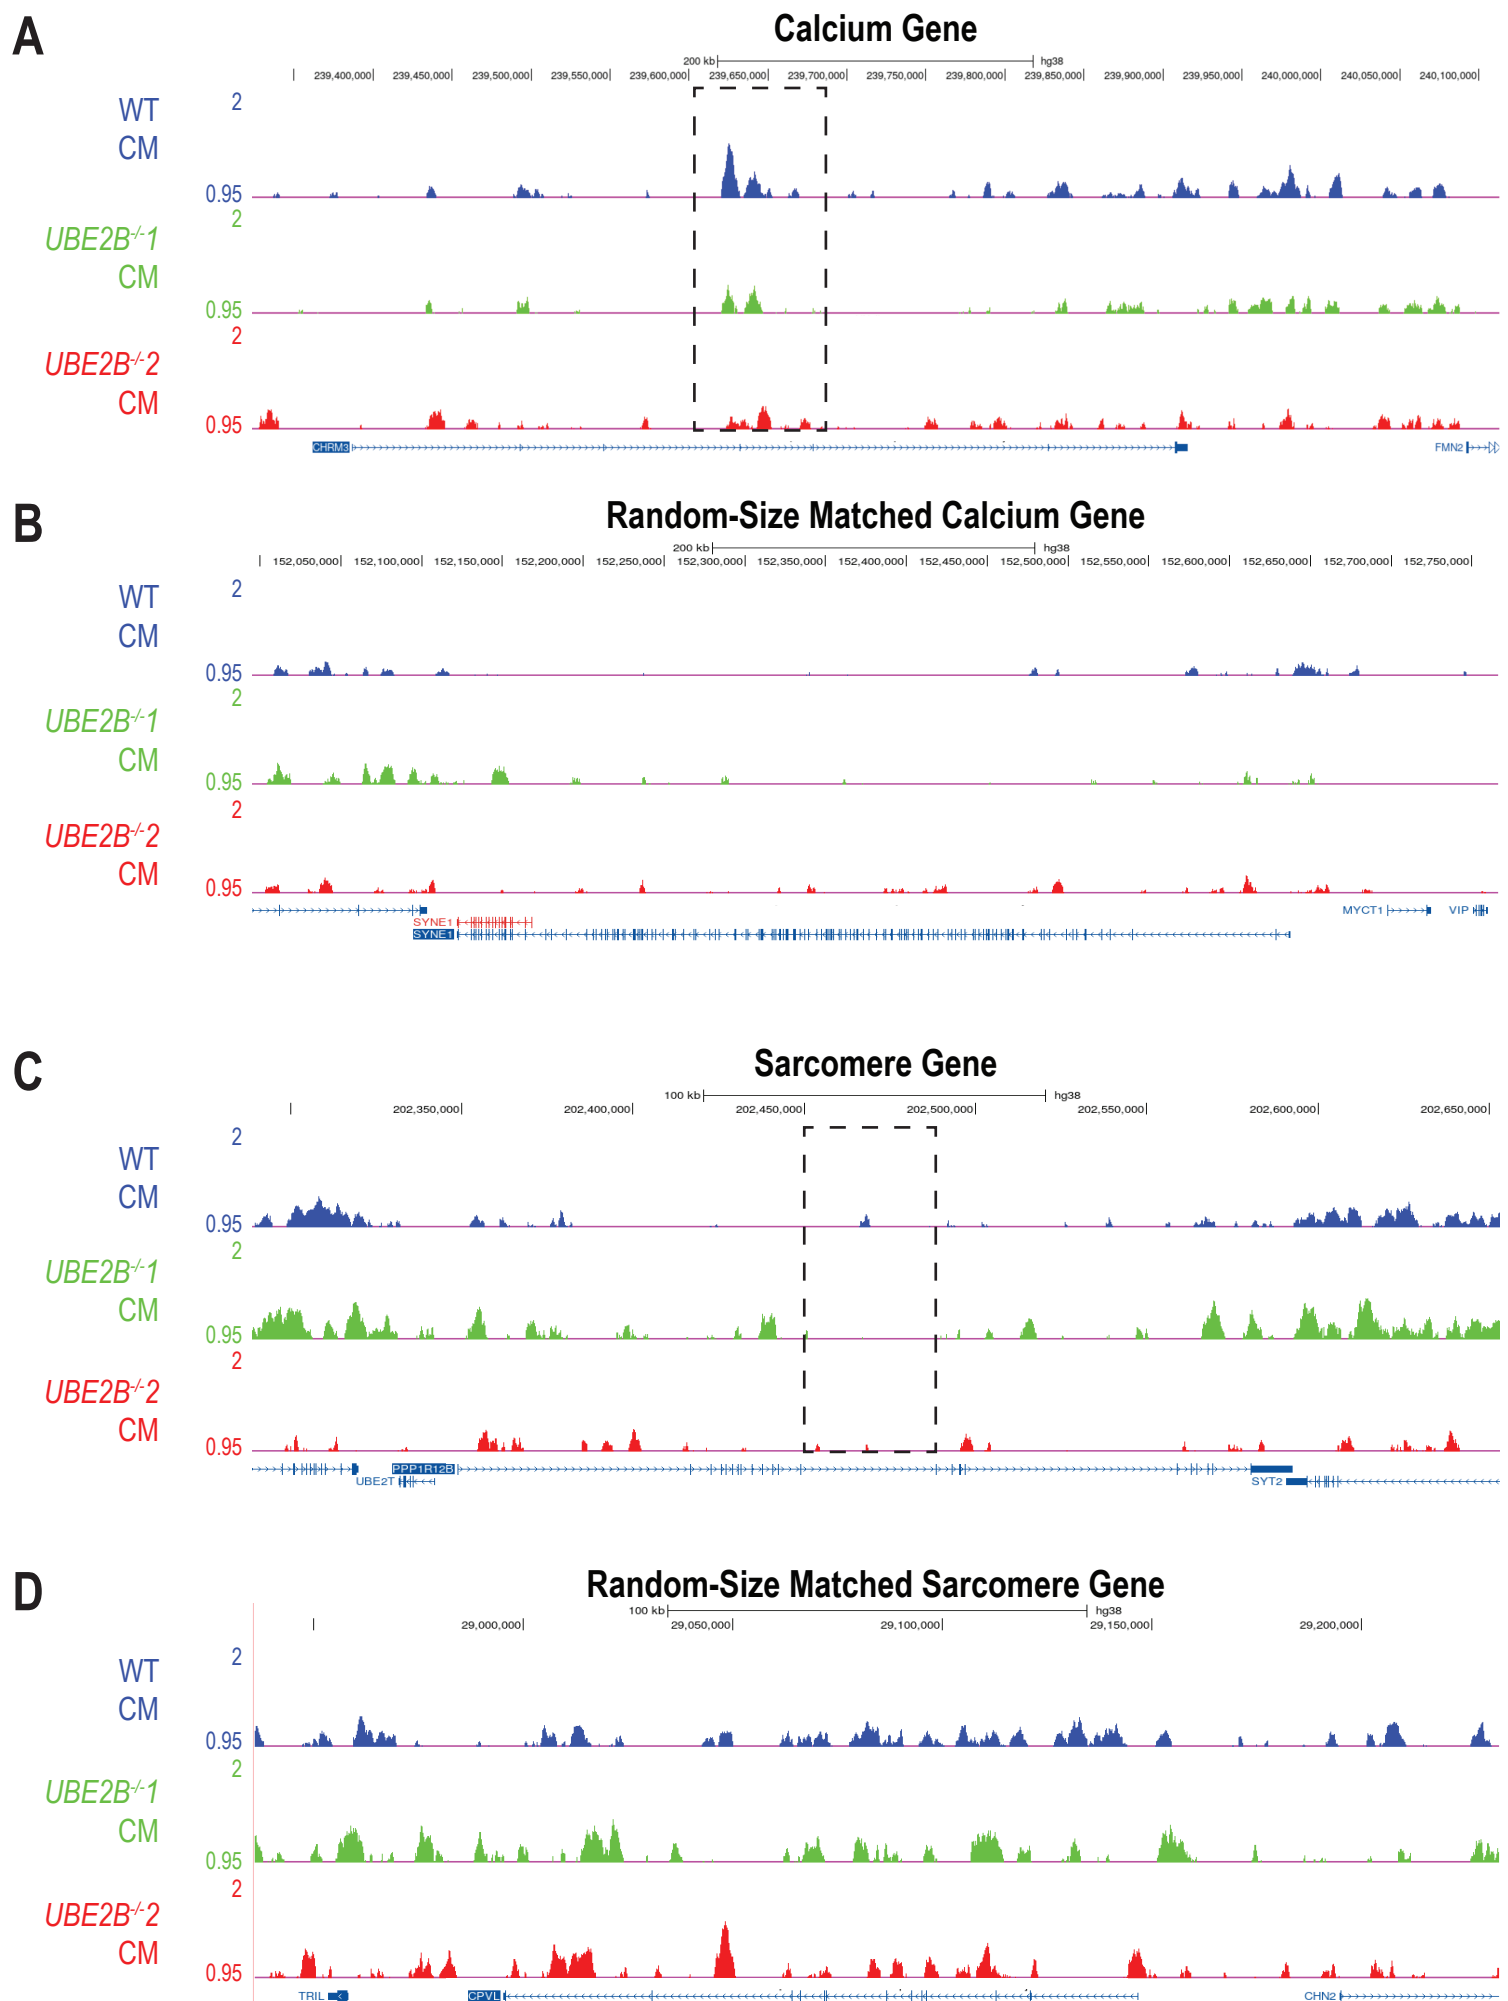

**Fig. S17. Metagene examples.** Example long tissue-specific genes (A and C) with H2Bub1 accumulation near the center of the gene and example random-size matched genes (B and D) without H2Bub1 accumulation near the center of the gene. 5' on the left of the diagram (WT (blue), *UBE2B*<sup>-1</sup> (green), and *UBE2B*<sup>-2</sup> (red)). The boxes highlight the accumulation regions.

**Table S1. Primers** A list of all of the primers used in this study and their application.

| Primer Name                                  | Sequence                  | Species | Application                 |
|----------------------------------------------|---------------------------|---------|-----------------------------|
| 18s F                                        | CTTAGAGGGACAAGTGGCG       | Mouse   | Calcium qRT-PCR Experiment  |
| 18s R                                        | ACGCTGAGCCAGTCAGTGTA      | Mouse   | Calcium qRT-PCR Experiment  |
| <i>Cacna1c</i> F (Gomez-Ospina et al., 2013) | CCTAATGGGTTTCGTTTCAGAAAGT | Mouse   | Calcium qRT-PCR Experiment  |
| <i>Cacna1c</i> R (Gomez-Ospina et al., 2013) | TCCGGTTACCTCCAGGTCA       | Mouse   | Calcium qRT-PCR Experiment  |
| <i>Ncx</i> F (Santulli et al., 2015)         | AGATCAAGCATCTGCGTGTG      | Mouse   | Calcium qRT-PCR Experiment  |
| <i>Ncx</i> R (Santulli et al., 2015)         | CTCCACAACCTCCAGGAGAGC     | Mouse   | Calcium qRT-PCR Experiment  |
| <i>Ryr2</i> F (Santulli et al., 2015)        | CCTTGCCTGAGTGCAGTTG       | Mouse   | Calcium qRT-PCR Experiment  |
| <i>Ryr2</i> R (Santulli et al., 2015)        | TTGAGGTATCAACAGGTTGTGG    | Mouse   | Calcium qRT-PCR Experiment  |
| <i>Serca2a</i> F (Chung et al., 2019)        | GGGCAAAGTGTATCGACAGG      | Mouse   | Calcium qRT-PCR Experiment  |
| <i>Serca2a</i> R (Chung et al., 2019)        | TCAGCAGGAACCTTGTCCACC     | Mouse   | Calcium qRT-PCR Experiment  |
| <i>GAPDH</i> Exon F                          | GCAGGCCGGATGTGTTC         | Human   | Control for H2Bub1 ChIP-seq |
| <i>GAPDH</i> Exon R                          | AGAACAGTGAGCGCCTAGT       | Human   | Control for H2Bub1 ChIP-seq |
| <i>GAPDH</i> Promoter F                      | GGGCTCTCCAGAACATCATC      | Human   | Control for H2Bub1 ChIP-seq |
| <i>GAPDH</i> Promoter R                      | CAGTGAGCTTCCCGTTCCAG      | Human   | Control for H2Bub1 ChIP-seq |
| <i>RNF20</i> F                               | ACGACTGTCTTCTTCTGCCA      | Human   | Genotyping iPSC Mutants     |
| <i>RNF20</i> R                               | ACCACCTTCCCAGATTCTCG      | Human   | Genotyping iPSC Mutants     |
| <i>RNF20</i> Sequence                        | GCTTCCCCATACTCCAGAAA      | Human   | Genotyping iPSC Mutants     |
| <i>UBE2B</i> F                               | ACGTCATTGCAGGGTTGTTT      | Human   | Genotyping iPSC Mutants     |
| <i>UBE2B</i> R                               | CGGCAAAGCTTATGGGAGTA      | Human   | Genotyping iPSC Mutants     |
| <i>UBE2B</i> Sequence                        | GGCCCTTACCGCTTGAATC       | Human   | Genotyping iPSC Mutants     |
| <i>Rnf20</i> <sup>+/-</sup> F Null allele    | CCATTACCAGTTGGTCTGGTGTC   | Mouse   | Mouse genotyping            |
| <i>Rnf20</i> <sup>+/-</sup> F WT allele      | GACCTTCACCTCAAGTCTAGCAGAG | Mouse   | Mouse genotyping            |
| <i>Rnf20</i> <sup>+/-</sup> R Null allele    | TCCTCACTATGTTCTCTCGCTACTG | Mouse   | Mouse genotyping            |
| <i>Rnf20</i> <sup>+/-</sup> R WT allele      | TCCTCACTATGTTCTCTCGCTACTG | Mouse   | Mouse genotyping            |
| <i>UBE2B</i> F                               | CAGCTGCGGAGCATGTCCG       | Human   | Sequencing cDNA             |
| <i>UBE2B</i> R                               | CAACAATGGCCGAACTCTT       | Human   | Sequencing cDNA             |

**Table S2. Antibodies** A list of all of the antibodies used in this study, their species, their dilution, and their application.

| Antibody           | Catalogue Number        | Species | Dilution  | Application         |
|--------------------|-------------------------|---------|-----------|---------------------|
| H2Bub1             | Cell Signaling 5546s    | Rabbit  | 4 $\mu$ L | ChIP                |
| IgG                | Cell Signaling 2729s    | Rabbit  | 4 $\mu$ L | ChIP                |
| Brachyury          | R&D systems AF2085-SP   | Goat    | 1:20      | IF cells            |
| Cardiac Troponin T | Invitrogen MA5-12960    | Mouse   | 1:200     | IF cells            |
| ISL1               | DSHB 39.4D5 supernatant | Rat     | 1:10      | IF cells            |
| NKX2.5             | Santa Cruz sc-8697      | Goat    | 1:200     | IF cells            |
| OCT-4a             | Cell Signaling 2840S    | Rabbit  | 1:200     | IF cells            |
| CD31               | BD biosciences 550274   | Rat     | 1:500     | IF sections         |
| NKX2.5             | Santa Cruz sc-8697      | Goat    | 1:100     | IF sections         |
| RNF20              | Cell Signaling 11974    | Rabbit  | 1:200     | IF sections         |
| WT1                | Novus 6f-h2             | Mouse   | 1:250     | IF sections         |
| alpha-tubulin      | Invitrogen 62204        | Mouse   | 1:1000    | Western             |
| GAPDH              | Invitrogen MA515738HRP  | Mouse   | 1:20,000  | Western             |
| H2B                | Millipore 07-371        | Rabbit  | 1:12,000  | Western             |
| H2Bub1             | Cell Signaling 5546s    | Rabbit  | 1:200,000 | Western             |
| RNF20              | Cell Signaling 11974    | Rabbit  | 1:500     | Western             |
| RNF40              | Abcam ab191309          | Rabbit  | 1:1000    | Western             |
| UBE2B              | GenTex GTX100416        | Rabbit  | 1:500     | Western             |
| A488 anti-Goat     | Invitrogen A21467       | Chicken | 1:500     | IF (cells)          |
| A594 anti-Goat     | Invitrogen A21468       | Chicken | 1:500     | IF (section, cells) |
| A594 anti-Rabbit   | Invitrogen A32754       | Donkey  | 1:500     | IF (section, cells) |
| A488 anti-Rabbit   | Invitrogen A21206       | Donkey  | 1:500     | IF (section)        |
| A647 anti-mouse    | Invitrogen A31571       | Donkey  | 1:500     | IF (section)        |
| A488 anti-Mouse    | Invitrogen A21200       | Chicken | 1:500     | IF (section, cells) |
| A488 anti-Rat      | Invitrogen A21470       | Chicken | 1:500     | IF (section, cells) |
| A647 anti-Rat      | Invitrogen A21472       | Chicken | 1:500     | IF (section)        |

**Table S3. Guide RNAs** A list of all of the guide RNAs used for CRISPR in iPSCs.

| Guide   | Sequence             | Cell Line(s) Developed                                      |
|---------|----------------------|-------------------------------------------------------------|
| RNF20_1 | ACAGTGGAAACAATTAAGCT | <i>RNF20<sup>+/-1</sup></i> and <i>RNF20<sup>+/-2</sup></i> |
| RNF20_2 | GTGGAAACAATTAAGCTAGG | N/A                                                         |
| UBE2B_1 | AATCCCGCATGAGCCTCCTC | <i>UBE2B<sup>-/-1</sup></i>                                 |
| UBE2B_2 | ATCCCGCATGAGCCTCCTCC | <i>UBE2B<sup>-/-2</sup></i>                                 |



**Table S4. Encode Accession Numbers** A list of all of the Encode Data that was used in this study.

| Experiment  | Bedfile     | Target   | Tissue                               |
|-------------|-------------|----------|--------------------------------------|
| ENCSR864LRY | ENCFF289NJD | H3K27me3 | cardiac muscle originated from RUES2 |
| ENCSR000ALU | ENCFF296RYM | H3K27me3 | Human h1-hESC                        |
| ENCSR652QNW | ENCFF905NTT | H3K4me3  | cardiac muscle originated from RUES2 |
| ENCSR000AMG | ENCFF668YOE | H3K4me3  | Human h1-hESC                        |
| ENCSR000APZ | ENCFF654ZZO | H3K9me3  | Human h1-hESC                        |
| ENCSR269ULZ | ENCFF677NKI | H3K9me3  | cardiac muscle originated from RUES2 |

**Table S5. ChIP-seq wild-type iPSC-derived cardiomyocytes**

**Tab 1:** contains the genes in Clusters 1-4 displayed in Fig. 3a.

**Tabs 2-21:** contain the gene ontology terms for the genes in Clusters 1-4 in iPSC, mesoderm (M), cardiac mesoderm (CMes), cardiac progenitor (CP), and cardiomyocyte (CM) in Fig. 3a.

**Tabs 22-29:** contain the differentially occupied regions between all of the consecutive stages (iPSC v. M, M v. CMes, CMes v. CP, and CP v. CM) of CM differentiation (Fig. 3, S8, S9).

Available for download at

<https://journals.biologists.com/dev/article-lookup/doi/10.1242/dev.201899#supplementary-data>

**Table S6. RNA-seq wild-type iPSC-derived cardiomyocytes**

**Tabs 1-8:** contain the genes that are differentially expressed between all of the consecutive stages (iPSC v. mesoderm (M), M v. cardiac mesoderm (CMes), CMes v. cardiac progenitor (CP), and CP v. cardiomyocyte (CM)) of CM differentiation (Fig. S8, S9).

**Tab 9:** contains the RNA-seq quality metrics.

Available for download at

<https://journals.biologists.com/dev/article-lookup/doi/10.1242/dev.201899#supplementary-data>

**Table S7. ChIP-seq *UBE2B*<sup>-/-</sup> cardiomyocytes**

**Tab 1:** contains the genes in Clusters 1-4 displayed in Fig. S13c.

**Tabs 2-5:** contain the differentially occupied regions between wild-type and *UBE2B*<sup>-/-</sup> cardiomyocytes (Fig. S16).

**Tabs 6-9:** contain the genes used for each metagene plot (Fig. 5, S16).

Available for download at

<https://journals.biologists.com/dev/article-lookup/doi/10.1242/dev.201899#supplementary-data>

**Table S8. RNA-seq *UBE2B*<sup>-/-</sup> cardiomyocytes**

**Tabs 1-4:** contain the genes that are differentially expressed between wild-type and *UBE2B*<sup>-/-</sup> cardiomyocytes (Fig. 4c, S13).

**Tab 5:** contains the RNA-seq quality metrics.

Available for download at

<https://journals.biologists.com/dev/article-lookup/doi/10.1242/dev.201899#supplementary-data>

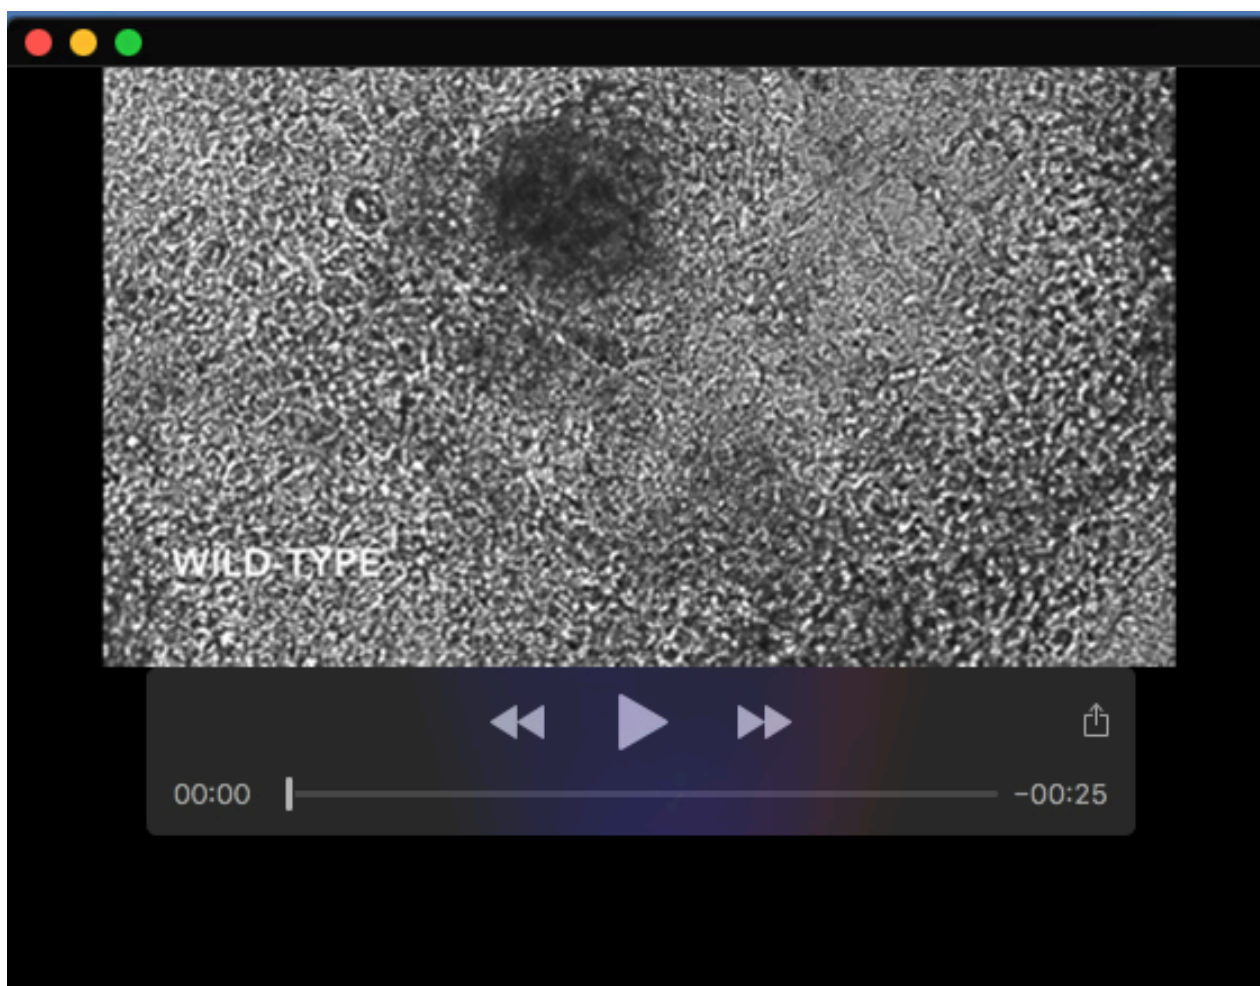

**Movie 1.** Movie shows wild-type cardiomyocytes under bright-field microscopy.

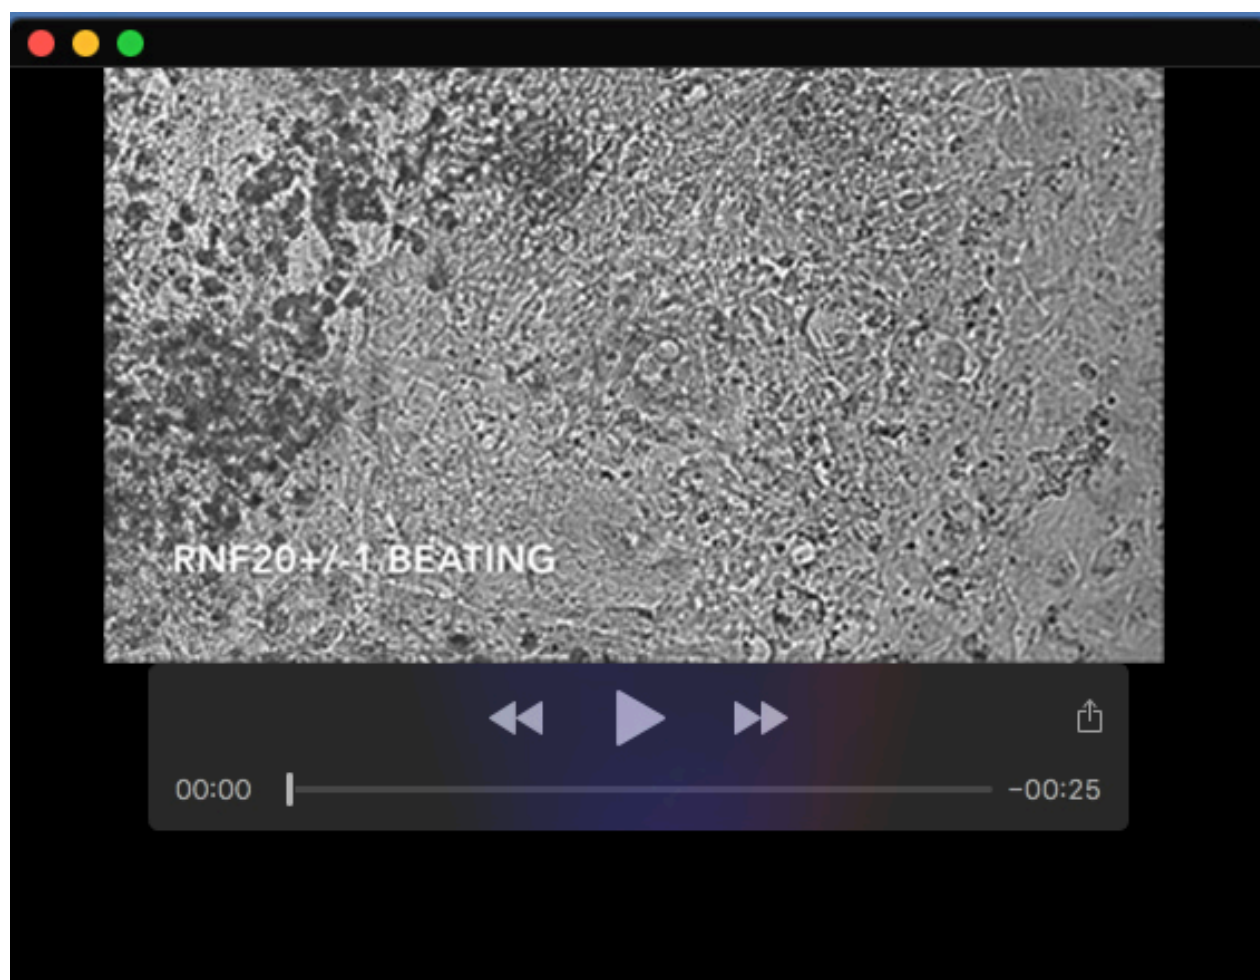

**Movie 2.** Movie shows *RNF20*<sup>+/-1</sup> cardiomyocytes beating under bright-field microscopy.

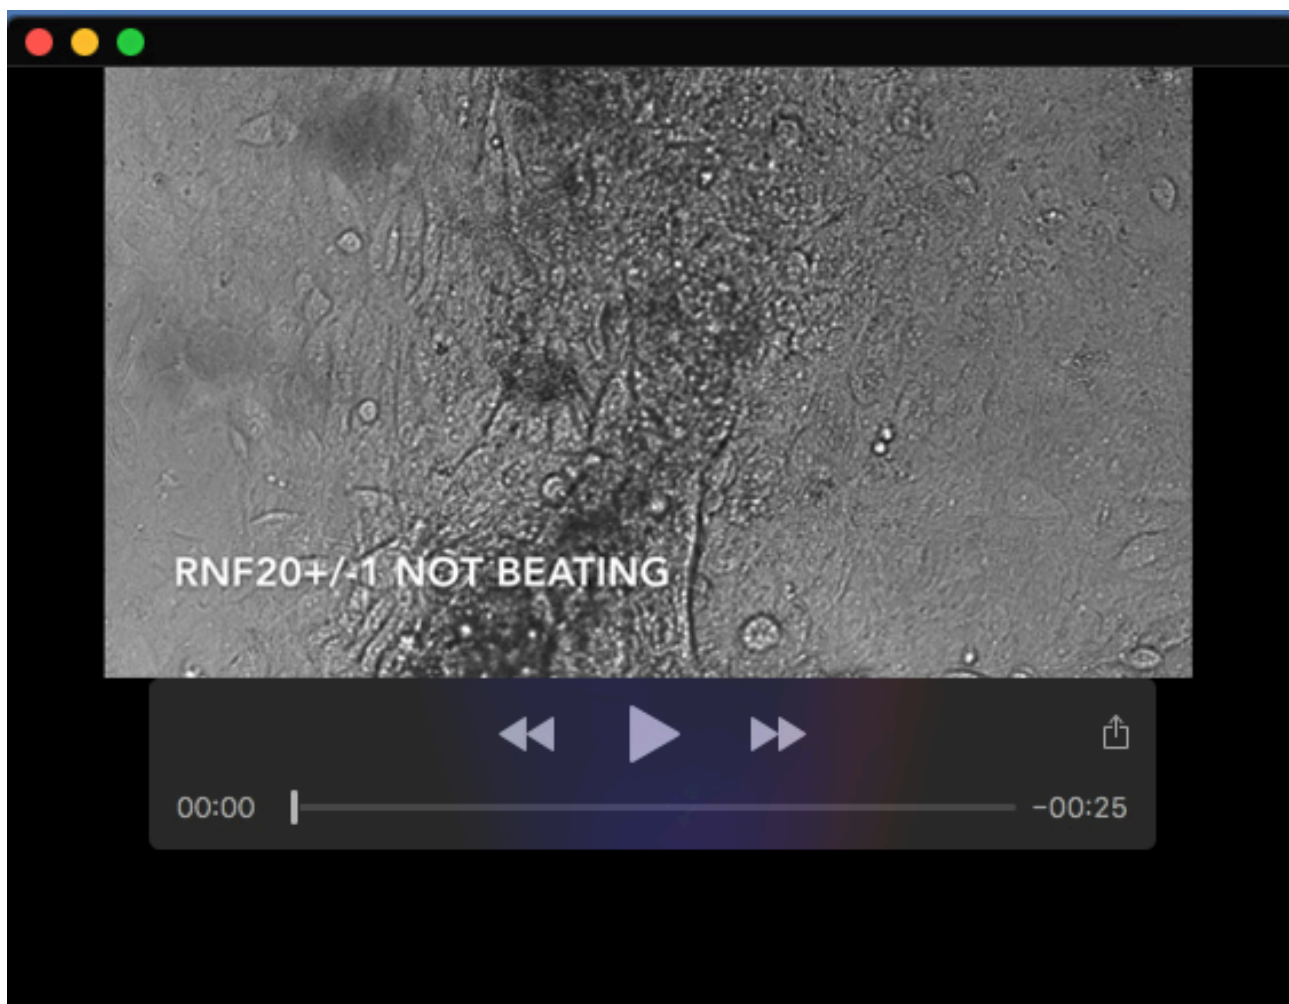

**Movie 3.** Movie shows *RNF20*<sup>+/-1</sup> cardiomyocytes not beating under bright-field microscopy.

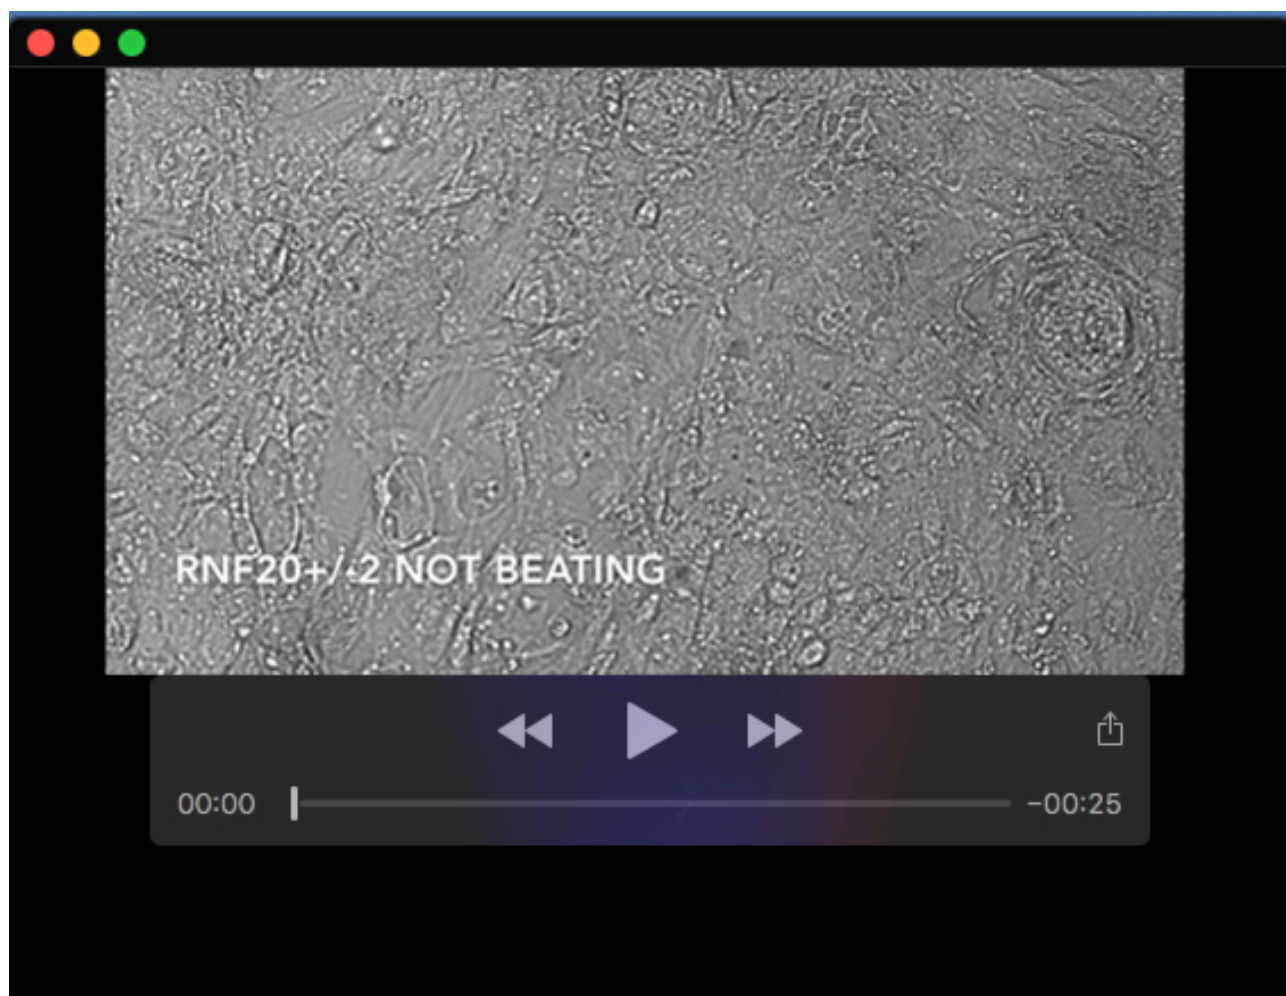

**Movie 4.** Movie shows *RNF20*<sup>+/-2</sup> cardiomyocytes not beating under bright-field microscopy.



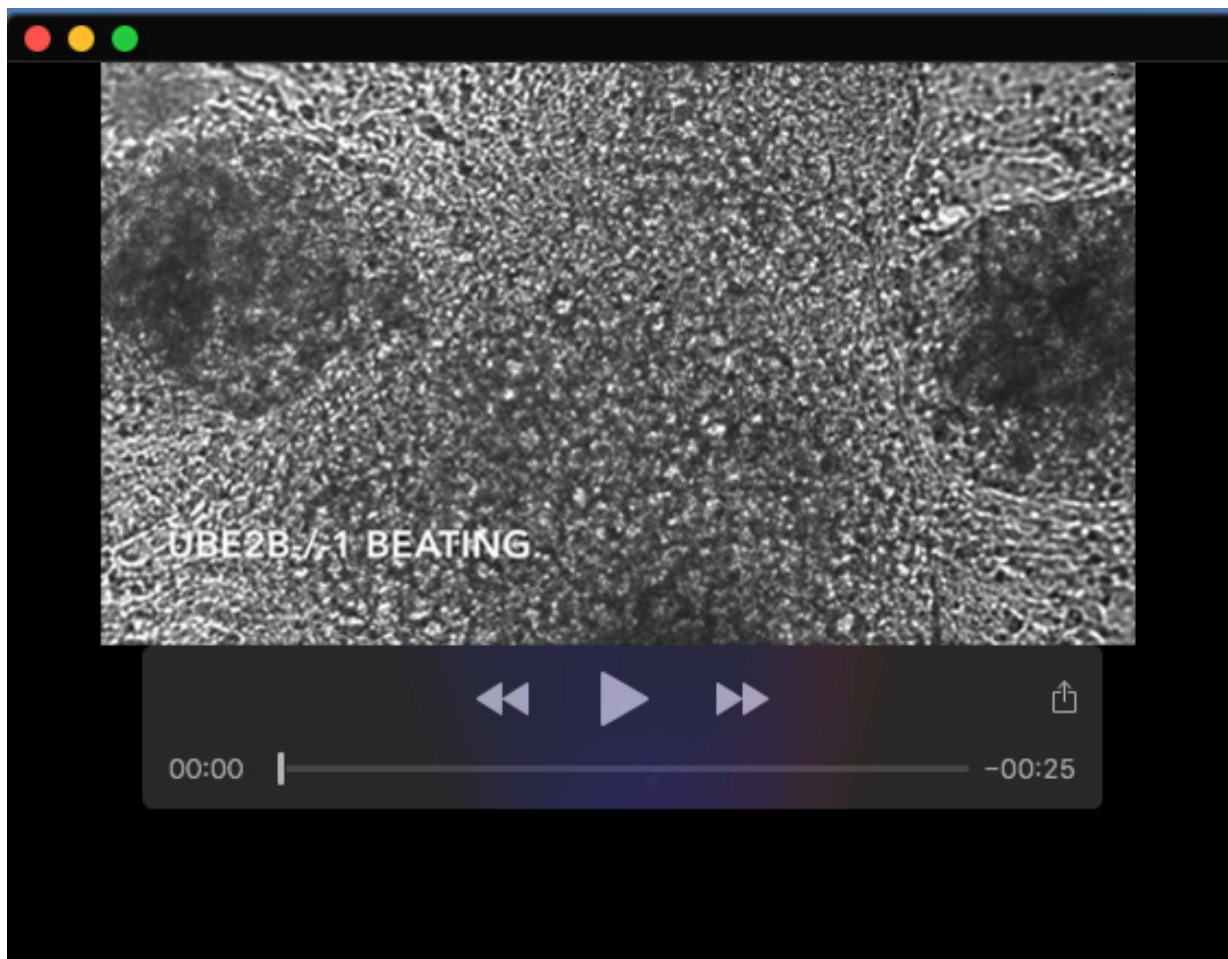

**Movie 5.** Movie shows *UBE2B<sup>-/-1</sup>* cardiomyocytes beating under bright-field microscopy.

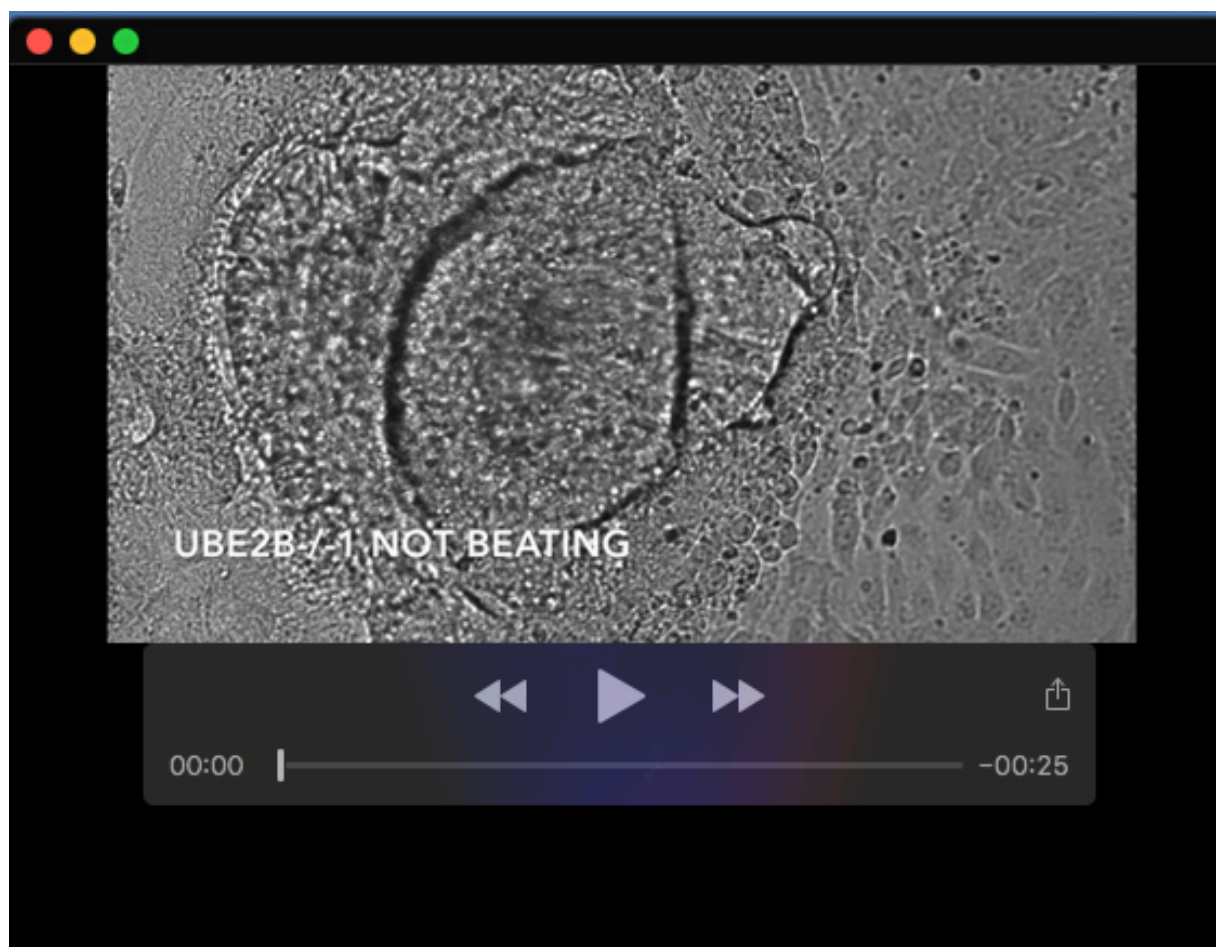

**Movie 6.** Movie shows *UBE2B<sup>-/-1</sup>* cardiomyocytes not beating under bright-field microscopy.



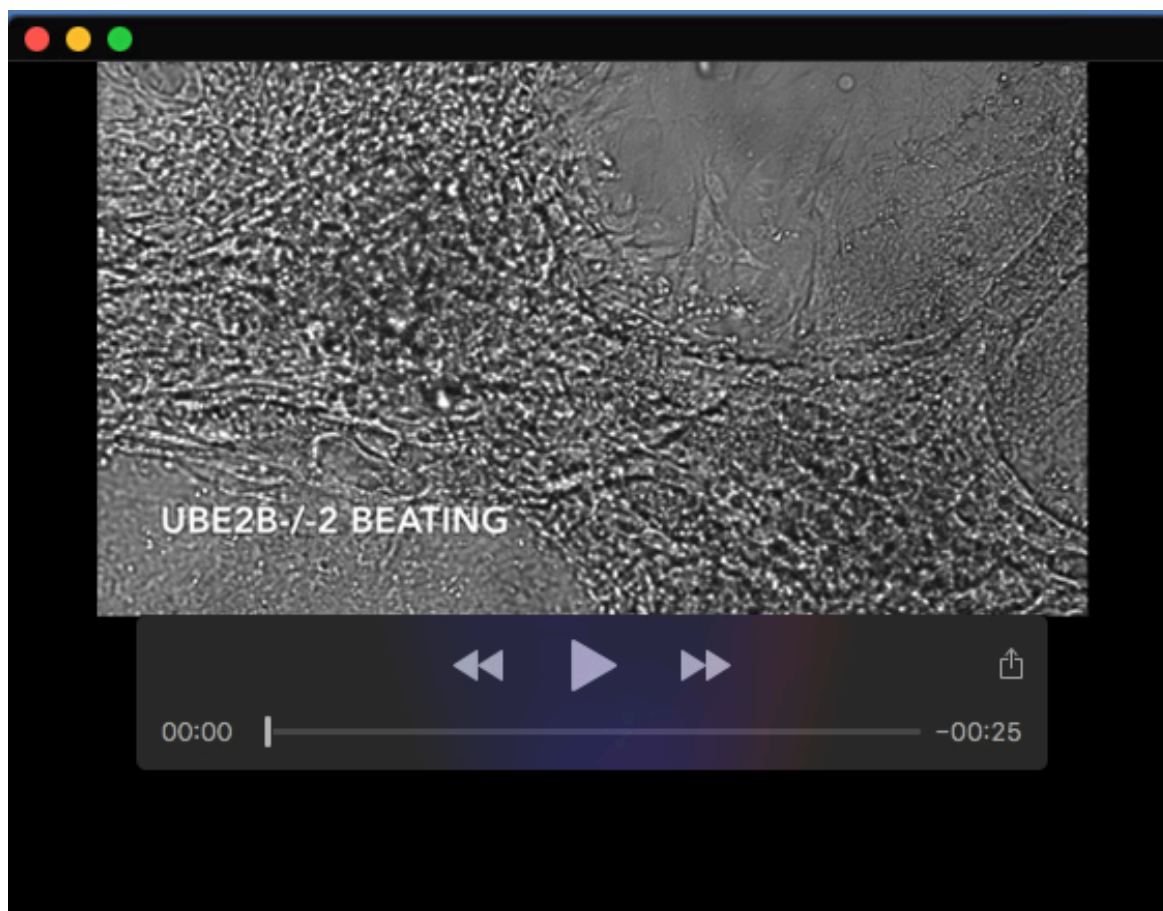

**Movie 7.** Movie shows *UBE2B*<sup>-/-2</sup> cardiomyocytes beating under bright-field microscopy.

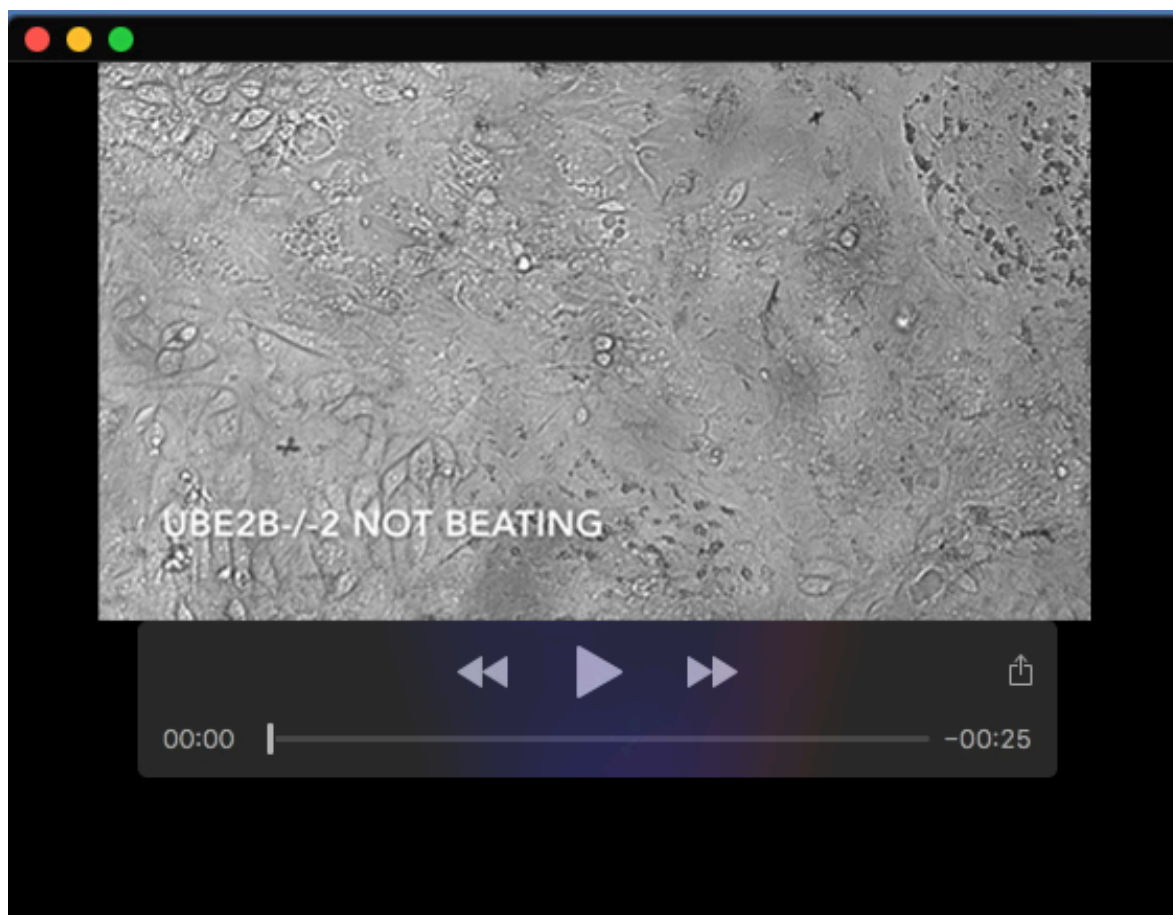

**Movie 8.** Movie shows *UBE2B*<sup>-/-2</sup> cardiomyocytes not beating under bright-field microscopy.

## References

- Chung, Y.J., Luo, A., Park, K.C., Loonat, A.A., Lakhali-Littleton, S., Robbins, P.A., Swietach, P., 2019. Iron-deficiency anemia reduces cardiac contraction by downregulating RyR2 channels and suppressing SERCA pump activity. *JCI Insight* 4.
- Gomez-Ospina, N., Panagiotakos, G., Portmann, T., Pasca, S.P., Rabah, D., Budzillo, A., Kinet, J.P., Dolmetsch, R.E., 2013. A promoter in the coding region of the calcium channel gene CACNA1C generates the transcription factor CCAT. *PLoS One* 8, e60526.
- Santulli, G., Pagano, G., Sardu, C., Xie, W., Reiken, S., D'Ascia, S.L., Cannone, M., Marziliano, N., Trimarco, B., Guise, T.A., Lacampagne, A., Marks, A.R., 2015. Calcium release channel RyR2 regulates insulin release and glucose homeostasis. *J Clin Invest* 125, 1968-1978.
