# Supplementary material for: The H2Bub1-deposition complex is required for human and mouse cardiogenesis
Source: Development. 2023 Dec 1;150(23):dev201899. doi: 10.1242/dev.201899 (PMC10730087; doi:10.1242/dev.201899)
Supplement: Table S6. RNA-seq wild-type iPSC-derived cardiomyocytes [file develop-150-201899-Dataset2.xlsx]

## Sheet: iPSC v M, iPSC up
ext_gene	target_id	pval	qval	b	se_b	mean_obs	var_obs	tech_var	sigma_sq	smooth_sigma_sq	final_sigma_sq
TERF1	ENST00000276602.10	3.43464e-73	7.83624e-69	-2.05451	0.113535	7.82979	1.28177	0.00478367	0.0145516	0.00799664	0.0145516
CCN2	ENST00000367976.4	1.78054e-64	3.04677e-60	-2.29949	0.135626	7.09478	1.60836	0.00143217	0.0261596	0.0090109	0.0261596
FOXO1	ENST00000379561.6	2.2001e-62	2.5098e-58	-1.45156	0.0870813	6.92995	0.634173	0.00191773	0.000659065	0.009457	0.009457
DGKK	ENST00000611977.2	5.87909e-62	5.74857e-58	-3.11367	0.187455	4.75509	2.93594	0.021167	0.0131556	0.0315422	0.0315422
RFLNB	ENST00000329099.4	3.46811e-60	2.63753e-56	-1.48611	0.090817	6.46596	0.667456	0.00112681	0.00499641	0.0112448	0.0112448
RFLNB	ENST00000640199.1	3.46811e-60	2.63753e-56	-1.48611	0.090817	6.46596	0.667456	0.00112681	0.00499641	0.0112448	0.0112448
SDC2	ENST00000302190.9	1.2104e-57	6.9039e-54	-1.57381	0.0983424	6.55069	0.75365	0.00364964	0.00958325	0.0108572	0.0108572
THBS1	ENST00000260356.5	7.69179e-57	4.04978e-53	-1.46003	0.091896	6.61919	0.644537	0.00210543	0.00418237	0.0105619	0.0105619
NRK	ENST00000243300.14	1.17231e-56	5.73141e-53	-1.54746	0.0975612	6.31157	0.726775	0.00230725	0.0081749	0.01197	0.01197
FAM160A1	ENST00000435205.6	1.45398e-49	5.85407e-46	-1.13622	0.0767691	7.64353	0.391414	0.000724865	0.00441753	0.00811538	0.00811538
MT1X	ENST00000394485.5	1.18448e-45	4.50404e-42	-2.55155	0.179915	5.393	1.99196	0.00794039	0.0406136	0.0195386	0.0406136
LIPA	ENST00000336233.10	5.31675e-45	1.91532e-41	-1.27568	0.0906262	7.27078	0.49806	0.00174111	0.0105785	0.00862973	0.0105785
PDZD2	ENST00000438447.2	1.624e-44	5.55782e-41	-1.92904	0.137818	5.77132	1.13915	0.0051252	0.0233653	0.0152948	0.0233653
THY1	ENST00000528295.5	1.83158e-43	5.69839e-40	-1.97462	0.142842	6.54281	1.19423	0.00487947	0.0257265	0.0108925	0.0257265
NET1	ENST00000380359.3	5.46912e-43	1.62756e-39	-1.08297	0.0787909	7.67106	0.355618	0.00121981	0.00349432	0.00809221	0.00809221
SPATS2L	ENST00000360760.9	3.00085e-40	7.89985e-37	-1.39208	0.104821	6.81859	0.586547	0.00666988	-0.000191097	0.00981115	0.00981115
KCNK5	ENST00000359534.4	2.93711e-39	7.17977e-36	-1.37723	0.105062	6.63834	0.582274	0.00193441	0.0146228	0.0104829	0.0146228
SLC7A8	ENST00000316902.12	4.17e-38	9.2071e-35	-1.19868	0.0928787	8.17552	0.441403	0.000460892	0.0124788	0.0080106	0.0124788
ANKRD33B	ENST00000296657.7	4.75673e-38	1.01744e-34	-1.32382	0.102656	6.14194	0.538322	0.00297465	0.0127424	0.0128326	0.0128326
CACNG7	ENST00000391767.5	2.38275e-37	4.94211e-34	-1.18761	0.0929929	6.48418	0.431589	0.0018107	0.00877221	0.0111608	0.0111608
NMNAT2	ENST00000287713.7	6.55396e-37	1.28169e-33	-1.23258	0.097115	6.32735	0.458195	0.00225286	0.00077305	0.0118941	0.0118941
JARID2	ENST00000341776.7	9.74799e-36	1.75582e-32	-1.14557	0.0918016	8.83844	0.403813	0.000434912	0.0122064	0.00893855	0.0122064
NGFR	ENST00000172229.8	1.07286e-35	1.88289e-32	-2.18033	0.17483	4.85759	1.46283	0.0143729	0.0314753	0.0291083	0.0314753
ATCAY	ENST00000450849.7	1.33854e-35	2.29045e-32	-1.40978	0.113203	6.83799	0.611619	0.00169405	0.0175284	0.00974623	0.0175284
VASH2	ENST00000366968.8	1.92535e-35	3.21422e-32	-1.08451	0.087288	7.42909	0.354788	0.00306416	-0.000636208	0.00836462	0.00836462
TRIML2	ENST00000512729.5	4.64426e-35	7.56859e-32	-1.54685	0.125212	5.71471	0.733345	0.00773199	0.0116725	0.0157851	0.0157851
NLGN4X	ENST00000381095.8	4.68864e-34	7.46323e-31	-1.36236	0.111977	7.2689	0.563992	0.0101748	-0.00119604	0.0086333	0.0086333
CDK14	ENST00000380050.8	6.39637e-34	9.95014e-31	-1.17832	0.0970521	6.73452	0.421669	0.00401998	0.00240311	0.0101087	0.0101087
FOXD3	ENST00000371116.3	8.43447e-34	1.2829e-30	-2.49425	0.205823	4.47833	1.88655	0.0233859	0.00181703	0.0401585	0.0401585
KLHDC7A	ENST00000400664.2	3.90606e-33	5.68839e-30	-3.20338	0.267123	4.81471	3.16412	0.026941	0.0800911	0.030089	0.0800911
TTC39C	ENST00000317571.8	1.03343e-32	1.44356e-29	-1.2943	0.108661	6.31865	0.510918	0.00577492	0.00467272	0.0119359	0.0119359
IDO1	ENST00000522495.5	6.82858e-32	9.16449e-29	-1.93235	0.164416	5.76503	1.1393	0.0252015	-0.00132088	0.0153474	0.0153474
CCN1	ENST00000451137.7	8.09388e-31	1.00726e-27	-2.63607	0.228388	6.71211	2.14726	0.00292361	0.075318	0.0101926	0.075318
CCDC141	ENST00000443758.6	4.91848e-30	6.01161e-27	-1.91098	0.167838	5.08835	1.12325	0.0177238	0.0168914	0.0245307	0.0245307
HELLS	ENST00000348459.10	9.36031e-30	1.12399e-26	-0.861199	0.076013	7.86285	0.225613	0.000682133	0.00321023	0.00798484	0.00798484
HK1	ENST00000359426.6	1.97839e-29	2.3347e-26	-0.881077	0.0782214	8.86937	0.235417	0.000163457	0.00299695	0.00901442	0.00901442
FAM126A	ENST00000440481.5	4.38138e-29	5.08284e-26	-0.973216	0.0869437	7.42946	0.293216	0.00127461	0.0100642	0.00836409	0.0100642
LHFPL6	ENST00000379589.4	5.83817e-29	6.55082e-26	-2.12039	0.189861	4.646	1.3847	0.0195482	0.0253	0.0345224	0.0345224
PADI2	ENST00000375486.9	5.20661e-28	5.56831e-25	-1.84095	0.167785	5.05721	1.03047	0.017134	4.28323e-05	0.0250936	0.0250936
TMEM151B	ENST00000451188.6	4.85834e-27	4.96319e-24	-1.88125	0.174703	4.76672	1.06455	0.0145316	-0.0110092	0.03125	0.03125
STOM	ENST00000286713.6	1.1391e-26	1.14657e-23	-1.02832	0.0961987	6.42284	0.327646	0.00243698	0.0105784	0.0114443	0.0114443
NOVA2	ENST00000263257.6	2.14329e-26	2.12608e-23	-0.956018	0.0899293	6.85651	0.283896	0.00122717	0.0109038	0.00968555	0.0109038
RPL22L1	ENST00000463836.1	4.34852e-26	4.25199e-23	-1.97471	0.186918	6.05189	1.21177	0.0133073	0.0391002	0.0133399	0.0391002
STK10	ENST00000176763.10	2.0701e-25	1.99564e-22	-1.02736	0.098622	6.28164	0.326179	0.00247381	0.00944737	0.0121156	0.0121156
TNFRSF11A	ENST00000586569.3	3.38888e-25	3.2216e-22	-2.41028	0.232425	4.39736	1.74647	0.0375536	-0.0330161	0.0434782	0.0434782
ETV6	ENST00000396373.8	3.5859e-25	3.3622e-22	-0.968159	0.0934085	6.40125	0.287726	0.00154291	0.00661599	0.0115448	0.0115448
ITPR2	ENST00000381340.8	5.43838e-25	5.03021e-22	-1.43655	0.139135	7.5024	0.642335	0.00105202	0.0279858	0.00826554	0.0279858
CNMD	ENST00000377962.8	1.33479e-24	1.20212e-21	-0.794596	0.0776097	7.73308	0.193162	0.000987727	0.00369582	0.00804717	0.00804717
FAM110C	ENST00000327669.5	1.41682e-24	1.25942e-21	-2.309	0.225652	4.74669	1.66055	0.0186185	0.0577598	0.0317563	0.0577598
PDGFB	ENST00000331163.10	5.96448e-24	5.04006e-21	-2.6483	0.262404	4.45528	2.18668	0.0313147	0.0719687	0.0410584	0.0719687
JPH4	ENST00000622501.4	7.45949e-24	6.22649e-21	-1.25909	0.125028	6.05701	0.483496	0.0101381	-0.000262369	0.0133098	0.0133098
HS6ST1	ENST00000259241.7	1.02641e-23	8.46429e-21	-0.816193	0.0813017	7.0956	0.20435	0.000906023	0.00471708	0.00900892	0.00900892
IGSF21	ENST00000251296.4	1.07154e-23	8.7313e-21	-1.45968	0.145462	5.33189	0.644761	0.0112545	-0.0043025	0.0204841	0.0204841
ZDHHC22	ENST00000319374.4	1.54282e-23	1.24236e-20	-0.86212	0.0862225	6.79125	0.2252	0.00124649	0.00153442	0.00990499	0.00990499
NRP2	ENST00000360409.7	1.90149e-23	1.51337e-20	-0.944997	0.0947075	6.56215	0.270665	0.00264786	0.000801791	0.0108064	0.0108064
CADM4	ENST00000222374.3	4.49153e-23	3.49349e-20	-1.02931	0.10405	6.06411	0.323275	0.00297129	0.00381945	0.0132685	0.0132685
USP32	ENST00000592339.5	4.82338e-23	3.66823e-20	-0.858341	0.0868304	7.09713	0.225596	0.00230409	0.00341037	0.00900518	0.00900518
SPATS2L	ENST00000409151.5	4.77978e-23	3.66823e-20	-0.979921	0.0991205	6.80855	0.299305	0.00489203	0.0091472	0.00984527	0.00984527
PDGFRB	ENST00000261799.9	4.96885e-23	3.73734e-20	-2.05441	0.207888	4.53837	1.28807	0.026858	0.000507621	0.037968	0.037968
PHC1	ENST00000544916.6	5.44881e-23	4.04905e-20	-0.874616	0.0885863	9.10415	0.230831	0.00206998	-0.000389274	0.00970132	0.00970132
TEK	ENST00000380036.9	3.88775e-22	2.68789e-19	-1.05473	0.109027	6.34872	0.343452	0.00603811	0.00610774	0.0117921	0.0117921
GPR176	ENST00000299092.3	5.9926e-22	4.1017e-19	-1.91575	0.198943	7.28091	1.14852	0.00158803	0.0577792	0.00861061	0.0577792
SDC2	ENST00000522911.5	6.09874e-22	4.13301e-19	-1.45793	0.151428	5.64383	0.66518	0.00854492	0.0258506	0.016459	0.0258506
MACF1	ENST00000361689.6	1.41356e-21	9.39342e-19	-0.763308	0.0800023	8.64562	0.180828	0.00106465	0.00648092	0.00853589	0.00853589
AASS	ENST00000417368.7	1.70775e-21	1.11322e-18	-1.45624	0.152944	8.98259	0.664265	0.000396216	0.0346914	0.00932042	0.0346914
PHC1	ENST00000433083.6	3.77322e-21	2.41366e-18	-1.17048	0.124008	8.24174	0.429463	0.00909822	0.0139689	0.00804827	0.0139689
LPL	ENST00000650287.1	4.41389e-21	2.77168e-18	-2.05784	0.218402	4.86724	1.32765	0.00943237	0.0621166	0.0288943	0.0621166
NA	ENST00000311322.10	4.41389e-21	2.77168e-18	-2.05784	0.218402	4.86724	1.32765	0.00943237	0.0621166	0.0288943	0.0621166
DNMT3B	ENST00000328111.6	6.69333e-21	4.16483e-18	-1.17081	0.12484	10.3399	0.429939	8.84069e-05	0.0232891	0.0181168	0.0232891
ARAP3	ENST00000239440.9	8.99111e-21	5.54419e-18	-1.475	0.157799	6.32535	0.682568	0.0127502	0.0246008	0.0119037	0.0246008
ADAMTS15	ENST00000299164.3	1.3634e-20	8.33208e-18	-1.29774	0.139495	5.15911	0.51112	0.00589024	0.00145826	0.023298	0.023298
THY1	ENST00000284240.9	1.76744e-20	1.07057e-17	-2.034	0.219287	7.52692	1.29885	0.00102439	0.0711057	0.00823565	0.0711057
GNG12	ENST00000370982.4	1.98018e-20	1.17857e-17	-0.807421	0.0871624	6.92503	0.204695	0.00112776	0.0102682	0.00947172	0.0102682
G3BP2	ENST00000395719.7	2.12858e-20	1.25597e-17	-0.702619	0.0759121	8.23221	0.154039	0.000601841	0.00681975	0.00804214	0.00804214
PHC1P1	ENST00000554937.1	3.49442e-20	2.02694e-17	-0.797055	0.0866121	7.26016	0.194103	0.00260241	0.00178989	0.00865008	0.00865008
OSBPL10	ENST00000396556.6	4.00355e-20	2.28356e-17	-0.885651	0.0963925	6.52645	0.246431	0.00297071	0.0109266	0.0109666	0.0109666
FZD5	ENST00000295417.4	4.24514e-20	2.40135e-17	-1.39802	0.152262	7.92337	0.614159	0.000485066	0.0342907	0.00797042	0.0342907
CGN	ENST00000271636.12	4.35856e-20	2.44529e-17	-0.750872	0.0818049	7.10793	0.173036	0.00105892	0.00380751	0.00897914	0.00897914
AASS	ENST00000358954.6	4.99722e-20	2.75838e-17	-1.67613	0.182902	6.60856	0.868387	0.0395736	-0.00762256	0.0106064	0.0106064
CRIM1	ENST00000280527.7	8.70691e-20	4.72979e-17	-0.807729	0.0887225	6.65453	0.198221	0.00139022	0.00172633	0.0104173	0.0104173
TPM1	ENST00000610733.1	1.55345e-19	8.1166e-17	-2.76681	0.306032	4.77789	2.40896	0.0235114	0.116972	0.0309735	0.116972
CALD1	ENST00000361675.7	2.16029e-19	1.12018e-16	-1.25515	0.139387	6.04581	0.490845	0.0157672	0.00701174	0.0133758	0.0133758
PDE3A	ENST00000359062.3	2.24646e-19	1.1561e-16	-2.20719	0.245229	4.34632	1.52767	0.0443872	0.0383287	0.0458185	0.0458185
NECTIN3	ENST00000485303.6	3.63688e-19	1.84392e-16	-1.18159	0.132059	5.86288	0.439777	0.00481301	0.0213463	0.0145793	0.0213463
ERRFI1	ENST00000377482.10	4.22658e-19	2.12715e-16	-1.22518	0.137185	6.96958	0.472905	0.00119154	0.027038	0.00934147	0.027038
FLT1	ENST00000615840.4	5.0014e-19	2.49873e-16	-1.41468	0.158734	7.07682	0.630628	0.00213165	0.0356631	0.0090552	0.0356631
STXBP1	ENST00000373299.4	5.23977e-19	2.59885e-16	-1.09155	0.122549	6.17201	0.362564	0.00985528	-0.00345643	0.012672	0.012672
SGK1	ENST00000237305.11	6.06042e-19	2.98426e-16	-1.53038	0.172128	5.51492	0.721679	0.0265539	-0.00272633	0.0178883	0.0178883
RAB3B	ENST00000371655.4	7.95741e-19	3.89038e-16	-0.65862	0.0743312	8.07649	0.133514	0.000312245	0.00391215	0.00797545	0.00797545
NAV3	ENST00000397909.7	8.70759e-19	4.22695e-16	-1.79118	0.20238	4.84079	1.01164	0.029496	0.0319405	0.0294866	0.0319405
MUC3A	ENST00000614399.1	8.9528e-19	4.31538e-16	-1.22794	0.13879	5.27308	0.465004	0.00747609	0.0083441	0.0214177	0.0214177
USP32	ENST00000300896.9	1.07984e-18	5.1686e-16	-0.763401	0.0864895	7.29584	0.177165	0.00263766	0.000275625	0.00858299	0.00858299
KIAA0930	ENST00000336156.9	1.34292e-18	6.38316e-16	-0.825944	0.093835	6.54648	0.21078	0.00233149	0.00532489	0.010876	0.010876
NAP1L3	ENST00000373079.3	1.46442e-18	6.91266e-16	-1.12717	0.128199	6.96359	0.400876	0.00449632	0.0201561	0.00935859	0.0201561
EXT1	ENST00000378204.6	2.78064e-18	1.26883e-15	-0.863034	0.0989711	6.32352	0.233349	0.00278043	0.00959564	0.0119125	0.0119125
UTF1	ENST00000304477.3	4.90264e-18	2.20767e-15	-1.48084	0.171085	5.37238	0.692994	0.00578983	0.0381152	0.0198518	0.0381152
GPR176	ENST00000561100.1	9.11323e-18	4.02428e-15	-1.83319	0.213543	5.76891	1.0629	0.0113352	0.057066	0.0153149	0.057066
SERPINE1	ENST00000223095.4	1.23504e-17	5.35021e-15	-2.60025	0.304137	4.51336	2.1394	0.023706	0.115043	0.0388548	0.115043
ARMH4	ENST00000334342.5	1.34832e-17	5.80423e-15	-1.48534	0.173938	5.17849	0.66658	0.0224115	-0.0165229	0.0229701	0.0229701
GCNT2	ENST00000316170.8	1.56422e-17	6.64997e-15	-1.26128	0.147997	6.45726	0.503529	0.00285372	0.030001	0.0112849	0.030001
GCNT2	ENST00000643503.1	1.56422e-17	6.64997e-15	-1.26128	0.147997	6.45726	0.503529	0.00285372	0.030001	0.0112849	0.030001
OSBPL10	ENST00000438237.6	1.69304e-17	7.15318e-15	-0.873505	0.102607	6.29719	0.233836	0.00375252	0.00241262	0.0120397	0.0120397
ACTN3	ENST00000513398.2	1.82891e-17	7.67984e-15	-1.59052	0.187028	4.56629	0.78735	0.0154504	0.0200801	0.0370188	0.0370188
EIF2AK4	ENST00000263791.10	2.31845e-17	9.55957e-15	-0.642193	0.0757605	8.25455	0.1257	0.00055261	0.00191828	0.00805688	0.00805688
DPYSL2	ENST00000311151.9	3.89673e-17	1.5782e-14	-0.789015	0.0937521	8.22369	0.197311	0.000454874	0.0127293	0.00803687	0.0127293
SLC38A2	ENST00000256689.10	5.07077e-17	2.02967e-14	-0.930346	0.110953	9.06507	0.274436	0.0007973	0.0176686	0.0095727	0.0176686
TPM1	ENST00000358278.7	5.8341e-17	2.32163e-14	-0.950978	0.113637	8.25844	0.286804	0.000536684	0.0188335	0.00805958	0.0188335
COL1A1	ENST00000225964.9	6.02208e-17	2.38258e-14	-0.745643	0.0891407	7.63036	0.176331	0.000536063	0.011383	0.00812718	0.011383
PHACTR2	ENST00000427704.6	6.15561e-17	2.42142e-14	-0.697779	0.0834444	7.27794	0.154424	0.00130095	0.00914349	0.00861618	0.00914349
SEC14L5	ENST00000251170.12	6.32863e-17	2.47526e-14	-1.13422	0.13569	5.28723	0.392719	0.00642635	0.00204735	0.0211913	0.0211913
FRMD4A	ENST00000357447.7	8.02043e-17	3.10151e-14	-0.958179	0.115015	5.97379	0.291306	0.00320659	0.0166359	0.0138191	0.0166359
SHROOM4	ENST00000376020.6	1.5462e-16	5.78314e-14	-1.88011	0.227812	5.25991	1.07977	0.0562177	-0.0320588	0.0216299	0.0216299
PALM3	ENST00000340790.8	1.63037e-16	6.032e-14	-0.831647	0.100848	6.15465	0.212113	0.00249123	0.00328574	0.0127642	0.0127642
SLC7A3	ENST00000374299.8	1.62721e-16	6.032e-14	-0.74561	0.0904123	7.7762	0.174033	0.00423988	0.00482664	0.00802169	0.00802169
NA	ENST00000647284.1	1.83478e-16	6.67997e-14	-1.15298	0.140054	5.29395	0.422348	0.00271522	0.0267074	0.0210842	0.0267074
NA	ENST00000642512.1	1.83478e-16	6.67997e-14	-1.15298	0.140054	5.29395	0.422348	0.00271522	0.0267074	0.0210842	0.0267074
AC104389.5	ENST00000642298.1	2.90206e-16	1.03455e-13	-0.939276	0.114863	5.74081	0.277887	0.00423634	0.0122832	0.0155541	0.0155541
OR52A1	ENST00000380367.2	2.91794e-16	1.03483e-13	-1.80489	0.220736	4.30271	1.02126	0.0250952	0.0298686	0.0479915	0.0479915
ADAMTS12	ENST00000504830.6	3.08607e-16	1.08881e-13	-0.782597	0.0957901	6.3778	0.191738	0.0021089	0.00789134	0.0116547	0.0116547
USP44	ENST00000258499.8	7.10946e-16	2.4494e-13	-1.33445	0.165388	7.83538	0.567053	0.00197731	0.0390524	0.00799445	0.0390524
MYCN	ENST00000281043.4	7.1214e-16	2.4494e-13	-1.57645	0.195386	6.37775	0.791372	0.00627754	0.0509857	0.0116549	0.0509857
PCSK5	ENST00000376752.8	7.90529e-16	2.69197e-13	-1.16401	0.144496	6.21172	0.43153	0.00265924	0.0286593	0.0124657	0.0286593
DNAJB6	ENST00000429029.6	1.131e-15	3.77621e-13	-0.655338	0.0817972	7.36112	0.133577	0.00156643	0.00435402	0.00846975	0.00846975
CALD1	ENST00000361901.6	1.60822e-15	5.21689e-13	-1.35422	0.16995	8.23274	0.584835	0.00143907	0.0418856	0.00804248	0.0418856
AXL	ENST00000301178.9	1.63942e-15	5.29301e-13	-1.11451	0.139909	6.53224	0.39613	0.00279802	0.0265638	0.0109402	0.0265638
MUC3A	ENST00000379458.9	1.76326e-15	5.66611e-13	-0.885437	0.111278	5.96566	0.242273	0.00470289	0.00413837	0.0138714	0.0138714
RASAL2	ENST00000462775.5	1.77206e-15	5.66776e-13	-0.671986	0.0844591	6.94009	0.14048	0.0012731	0.00499061	0.00942693	0.00942693
KIF21B	ENST00000332129.6	1.8777e-15	5.97773e-13	-0.734921	0.0924526	6.60793	0.163924	0.00221215	0.00015243	0.0106091	0.0106091
SYT1	ENST00000261205.9	1.97249e-15	6.25043e-13	-0.92192	0.116066	7.01821	0.271146	0.00110006	0.0191069	0.00920697	0.0191069
ARMH4	ENST00000267485.7	2.41335e-15	7.50837e-13	-0.843943	0.106585	6.02755	0.217053	0.00355564	0.000671197	0.0134849	0.0134849
CDK2AP1	ENST00000618072.4	3.07462e-15	9.47951e-13	-0.951142	0.120583	6.77613	0.285102	0.0118524	0.00527324	0.00995808	0.00995808
SEMA3A	ENST00000265362.9	4.43226e-15	1.34235e-12	-0.75129	0.0958027	6.42243	0.178167	0.00232105	0.00872355	0.0114462	0.0114462
PDPN	ENST00000475043.5	4.83854e-15	1.43991e-12	-1.00392	0.128198	5.80135	0.317208	0.00960185	0.00895946	0.0150502	0.0150502
SOCS3	ENST00000330871.3	5.55084e-15	1.64473e-12	-0.877173	0.11226	5.7829	0.242805	0.00370425	0.0112644	0.0151993	0.0151993
CNN1	ENST00000252456.7	5.88221e-15	1.7354e-12	-1.13036	0.144799	5.33727	0.407634	0.0110503	0.0193459	0.0203997	0.0203997
SLC24A2	ENST00000341998.6	5.92942e-15	1.74183e-12	-1.97405	0.252906	4.62728	1.24581	0.0160745	0.079868	0.0350822	0.079868
SEMA3F	ENST00000002829.8	7.41874e-15	2.17001e-12	-0.86283	0.110945	6.21587	0.238113	0.00595377	0.0125093	0.0124445	0.0125093
DIDO1	ENST00000370371.8	7.85515e-15	2.26858e-12	-1.30914	0.168489	6.63376	0.534002	0.0320809	-0.0072699	0.0105017	0.0105017
LARP7	ENST00000509622.5	7.83991e-15	2.26858e-12	-1.3102	0.16862	7.22381	0.54911	0.0207323	0.0219169	0.00872229	0.0219169
MXD4	ENST00000337190.7	9.22763e-15	2.64265e-12	-1.41425	0.182496	4.93018	0.639996	0.0106519	0.0393053	0.027554	0.0393053
TRHDE	ENST00000261180.8	1.02368e-14	2.91944e-12	-1.3614	0.175976	4.9621	0.593185	0.00949072	0.0369607	0.0269076	0.0369607
CYRIA	ENST00000381323.7	1.13878e-14	3.22087e-12	-1.1857	0.153534	5.03603	0.442673	0.00987432	0.0162635	0.0254845	0.0254845
AC012435.2	ENST00000563287.1	1.18489e-14	3.33748e-12	-0.7793	0.100976	6.84904	0.194428	0.00133267	0.0139616	0.00970987	0.0139616
RBPMS	ENST00000397323.9	1.30938e-14	3.65802e-12	-0.730454	0.0948038	7.09475	0.170854	0.00347283	0.0100088	0.00901097	0.0100088
AADACL3	ENST00000359318.8	1.33416e-14	3.71212e-12	-5.50563	0.714783	2.05967	9.11195	0.00684864	0.0161242	0.759524	0.759524
FAM126A	ENST00000409923.5	1.35468e-14	3.75395e-12	-0.961688	0.124885	7.06233	0.296169	0.00250059	0.020894	0.00909168	0.020894
NA	ENST00000644085.1	1.62992e-14	4.40955e-12	-1.24422	0.162073	4.7155	0.476979	0.00682935	0.00886602	0.0325721	0.0325721
NA	ENST00000645949.1	1.62992e-14	4.40955e-12	-1.24422	0.162073	4.7155	0.476979	0.00682935	0.00886602	0.0325721	0.0325721
MAMDC2	ENST00000377182.5	2.04517e-14	5.46813e-12	-1.71097	0.223722	5.56861	0.938292	0.0113427	0.0637349	0.017258	0.0637349
CSRP1	ENST00000340006.7	2.11727e-14	5.63885e-12	-1.69837	0.222204	5.36319	0.924586	0.0154146	0.0586471	0.0199945	0.0586471
PIF1	ENST00000268043.8	2.21487e-14	5.87593e-12	-0.953054	0.124786	6.55163	0.289154	0.0125044	0.00832039	0.010853	0.010853
SOCS1	ENST00000332029.2	3.10591e-14	8.17642e-12	-0.973988	0.12826	5.48294	0.300137	0.00638602	0.0130409	0.0182901	0.0182901
SYNGR1	ENST00000328933.10	3.54667e-14	9.26547e-12	-0.951687	0.125608	5.468	0.275718	0.00518112	-0.000173821	0.0184851	0.0184851
NECTIN2	ENST00000252483.10	3.67475e-14	9.56357e-12	-0.623991	0.0824075	7.30872	0.118528	0.00162684	0.000521496	0.00855966	0.00855966
C9orf135	ENST00000529446.5	5.95625e-14	1.51555e-11	-1.75018	0.233077	4.468	0.970598	0.0409298	0.0236391	0.0405575	0.0405575
INAFM2	ENST00000638170.1	7.73913e-14	1.94747e-11	-0.949452	0.127022	6.03581	0.2898	0.00252416	0.0216779	0.0134353	0.0216779
PPP1R17	ENST00000342032.8	7.79965e-14	1.95551e-11	-1.98855	0.266074	3.99736	1.25856	0.0363995	0.0539234	0.0697938	0.0697938
GLB1L3	ENST00000389887.9	9.05575e-14	2.26215e-11	-0.919909	0.123412	5.79693	0.272146	0.00357499	0.0192706	0.0150856	0.0192706
RAI14	ENST00000265109.8	9.2572e-14	2.30407e-11	-0.677324	0.0909027	8.05937	0.147546	0.00080219	0.0115928	0.00797193	0.0115928
MACF1	ENST00000360115.8	9.45271e-14	2.3442e-11	-0.845124	0.113465	6.46855	0.223413	0.00807861	0.0033496	0.0112328	0.0112328
TNIK	ENST00000436636.7	1.03522e-13	2.54881e-11	-0.703978	0.0946674	6.56869	0.156274	0.00266521	0.00683277	0.0107777	0.0107777
TMEM178A	ENST00000281961.3	1.06806e-13	2.62023e-11	-1.51569	0.203936	4.44693	0.690201	0.0209922	-0.0197385	0.0413927	0.0413927
L1TD1	ENST00000498273.2	1.1417e-13	2.79087e-11	-0.898141	0.120988	9.55849	0.259563	8.52101e-05	0.021872	0.0116886	0.021872
LEFTY2	ENST00000366820.10	1.16895e-13	2.84733e-11	-1.25943	0.169729	4.77256	0.48979	0.0121068	0.00531923	0.0311049	0.0311049
RGS5	ENST00000367903.7	1.46425e-13	3.54142e-11	-1.09329	0.147934	5.56717	0.383956	0.0155525	0.0161653	0.0172741	0.0172741
TMEM47	ENST00000275954.4	1.47385e-13	3.55207e-11	-0.676381	0.0915327	6.4984	0.141635	0.00147196	0.00401213	0.0110954	0.0110954
PPM1B	ENST00000378551.6	1.52789e-13	3.66941e-11	-0.692092	0.0937197	6.73528	0.149507	0.00306919	0.00419265	0.0101059	0.0101059
CHST9	ENST00000618847.5	2.15064e-13	5.12902e-11	-0.982588	0.133884	5.34592	0.301699	0.00662335	0.00844516	0.0202642	0.0202642
TRIM22	ENST00000379965.8	2.43919e-13	5.75699e-11	-0.730385	0.0997492	6.45237	0.171978	0.00265197	0.0122729	0.0113075	0.0122729
CCND3	ENST00000372991.8	2.66847e-13	6.255e-11	-1.38427	0.189363	5.07772	0.602127	0.0290661	0.00501716	0.0247213	0.0247213
SHISA2	ENST00000319420.3	3.02641e-13	6.99817e-11	-2.77508	0.380502	4.26085	2.48406	0.0390583	0.178114	0.0502418	0.178114
CELSR2	ENST00000271332.4	3.28314e-13	7.56625e-11	-0.588317	0.0807879	7.1217	0.109992	0.000843611	0.0068528	0.00894643	0.00894643
NLK	ENST00000407008.8	3.52484e-13	8.096e-11	-0.645264	0.0887247	6.8083	0.131712	0.00196197	0.0065408	0.00984613	0.00984613
SEC14L1	ENST00000436233.9	3.78162e-13	8.65676e-11	-0.61616	0.0848336	7.18052	0.11858	0.00198169	0.00387313	0.00881342	0.00881342
FLVCR1	ENST00000366971.9	4.69372e-13	1.07089e-10	-0.585075	0.0808798	7.50803	0.110544	0.000710636	0.00910167	0.00825853	0.00910167
RBPJ	ENST00000342320.8	5.23557e-13	1.1866e-10	-0.875738	0.121309	7.963	0.247734	0.00377431	0.0182997	0.00796601	0.0182997
FXYD6	ENST00000526014.6	7.04142e-13	1.59062e-10	-0.871383	0.121386	5.66168	0.241311	0.00581923	0.0110783	0.0162825	0.0162825
DNAJB5	ENST00000312316.9	7.11263e-13	1.60142e-10	-0.786141	0.109532	6.22544	0.199416	0.00560026	0.0119128	0.0123957	0.0123957
JUN	ENST00000371222.3	7.71747e-13	1.7319e-10	-1.22933	0.171549	5.30325	0.488693	0.00585273	0.0382908	0.0209364	0.0382908
MGAT3	ENST00000341184.7	8.01447e-13	1.79267e-10	-0.920639	0.128565	5.41568	0.2636	0.00558693	0.0060716	0.0192063	0.0192063
FAM126A	ENST00000498833.1	9.78264e-13	2.153e-10	-1.09304	0.153226	5.19621	0.365771	0.0125436	-0.00335635	0.0226736	0.0226736
EPHA1	ENST00000275815.4	1.10765e-12	2.42217e-10	-0.619526	0.0870558	6.63839	0.122564	0.000885338	0.00838962	0.0104827	0.0104827
EPHA1	ENST00000645847.2	1.10765e-12	2.42217e-10	-0.619526	0.0870558	6.63839	0.122564	0.000885338	0.00838962	0.0104827	0.0104827
LATS2	ENST00000382592.5	1.2339e-12	2.68966e-10	-0.633054	0.0891434	6.63194	0.126024	0.00141068	0.00583541	0.0105091	0.0105091
IL27RA	ENST00000263379.4	1.66279e-12	3.61306e-10	-0.91467	0.129553	5.79011	0.271127	0.00335909	0.021817	0.0151406	0.021817
DAG1	ENST00000308775.6	1.87403e-12	4.05916e-10	-0.587713	0.0834399	8.52551	0.11002	0.00210054	0.0058972	0.0083428	0.0083428
TTC39C	ENST00000577185.1	1.95589e-12	4.22312e-10	-1.3018	0.184978	4.65971	0.518927	0.0172028	-0.0040495	0.0341224	0.0341224
CCDC80	ENST00000439685.6	2.14235e-12	4.61118e-10	-1.59056	0.226417	5.48684	0.820479	0.0109796	0.0659176	0.0182401	0.0659176
HSPB8	ENST00000281938.6	2.29439e-12	4.90756e-10	-1.40821	0.200734	4.36139	0.623368	0.0153352	0.0202296	0.0451059	0.0451059
STAC2	ENST00000333461.6	2.29134e-12	4.90756e-10	-1.28855	0.183672	4.72178	0.513827	0.018198	0.0014532	0.0324049	0.0324049
CTDSPL	ENST00000443503.6	2.45224e-12	5.22884e-10	-0.940405	0.134228	6.87874	0.283888	0.0174116	0.00581354	0.00961435	0.00961435
PWWP2A	ENST00000307063.9	2.58656e-12	5.48111e-10	-0.601417	0.0859347	6.8106	0.112075	0.00123888	0.00321603	0.00983829	0.00983829
FLNC	ENST00000325888.12	2.69095e-12	5.68471e-10	-0.586541	0.0838756	7.03963	0.110268	0.0014025	0.00742138	0.00915019	0.00915019
HECW1	ENST00000453890.5	3.1455e-12	6.56394e-10	-2.19918	0.315472	4.13869	1.57034	0.0836467	0.0656373	0.0579052	0.0656373
KIRREL1	ENST00000359209.11	3.16672e-12	6.58812e-10	-0.906784	0.130096	6.53706	0.262313	0.014469	0.00507552	0.0109184	0.0109184
ZNF204P	ENST00000416749.1	3.3709e-12	6.96669e-10	-0.802496	0.115279	6.61967	0.209147	0.00132465	0.0186093	0.0105599	0.0186093
AC073111.4	ENST00000641330.1	3.52289e-12	7.24106e-10	-1.31025	0.188386	4.71232	0.55761	0.0124696	0.0407643	0.0326572	0.0407643
HEXIM1	ENST00000332499.3	3.66458e-12	7.48734e-10	-0.823112	0.118441	6.39838	0.220088	0.00196562	0.0190768	0.0115583	0.0190768
SYP	ENST00000263233.8	3.96613e-12	8.07933e-10	-1.20056	0.173032	4.67311	0.460925	0.0111715	0.0244803	0.0337386	0.0337386
GCNT4	ENST00000322348.5	4.09193e-12	8.28629e-10	-2.84945	0.410941	4.15254	2.63846	0.0402144	0.213094	0.0569363	0.213094
FABP3	ENST00000373713.6	4.086e-12	8.28629e-10	-1.28152	0.184812	4.79333	0.530576	0.0206354	0.0267284	0.0305976	0.0305976
STAC	ENST00000273183.7	4.1255e-12	8.32962e-10	-1.28923	0.185961	5.22538	0.540135	0.0109422	0.0409301	0.0221916	0.0409301
ZMAT4	ENST00000297737.11	5.01062e-12	1.00574e-09	-1.68534	0.244065	5.0871	0.923589	0.0105658	0.0787858	0.0245531	0.0787858
C14orf132	ENST00000555004.2	5.14627e-12	1.02694e-09	-0.59671	0.0864611	6.76579	0.111465	0.00121839	0.00458989	0.00999488	0.00999488
ADCY2	ENST00000338316.8	6.4928e-12	1.28813e-09	-0.607679	0.0884746	7.07412	0.120175	0.000962192	0.0107794	0.00906195	0.0107794
GABRP	ENST00000265294.9	7.19832e-12	1.41987e-09	-1.89303	0.276207	3.93904	1.11863	0.0385905	0.015862	0.0758449	0.0758449
ZBTB3	ENST00000394807.4	9.85509e-12	1.91631e-09	-0.73522	0.107984	5.83641	0.173861	0.00271363	0.0119067	0.0147772	0.0147772
TCEAL5	ENST00000372680.2	1.28379e-11	2.46136e-09	-1.19333	0.176256	4.67614	0.435471	0.0129462	-0.002624	0.033653	0.033653
GRIA4	ENST00000527669.1	1.3475e-11	2.57628e-09	-1.75947	0.260144	3.94886	0.978792	0.026737	0.0358509	0.0747755	0.0747755
EGLN3	ENST00000250457.7	1.38454e-11	2.63239e-09	-1.22458	0.181163	5.53127	0.48926	0.00822869	0.0410015	0.0176907	0.0410015
ITGA1	ENST00000650673.1	1.38103e-11	2.63239e-09	-0.956753	0.141534	5.16648	0.276632	0.00687493	-0.00435096	0.0231729	0.0231729
CALB1	ENST00000265431.7	1.67871e-11	3.15663e-09	-1.50183	0.223103	5.82876	0.736375	0.0113667	0.0632956	0.0148356	0.0632956
CRB2	ENST00000373631.8	2.05241e-11	3.84628e-09	-1.5082	0.225029	4.20918	0.685625	0.0226895	-0.0186549	0.0532672	0.0532672
PIM2	ENST00000376509.4	2.07129e-11	3.85249e-09	-0.893458	0.133334	7.84027	0.260814	0.000449066	0.0262178	0.0079926	0.0262178
DNM3	ENST00000367731.5	2.10392e-11	3.90257e-09	-2.94228	0.439236	3.40903	2.60548	0.121007	-0.11053	0.168386	0.168386
RPL22L1	ENST00000295830.13	2.36244e-11	4.37026e-09	-0.730069	0.109265	6.05736	0.174227	0.00405375	0.0138544	0.0133078	0.0138544
SALL2	ENST00000614342.1	2.48259e-11	4.58014e-09	-1.79096	0.268333	7.81107	1.04867	0.00801571	0.0999883	0.00800456	0.0999883
SPRY3	ENST00000302805.7	2.51725e-11	4.6316e-09	-2.0396	0.305679	4.56854	1.36012	0.0200013	0.120158	0.0369441	0.120158
STX1B	ENST00000215095.11	2.57659e-11	4.72807e-09	-0.859197	0.128836	5.43558	0.241384	0.00597321	0.0189247	0.0189246	0.0189247
CD24	ENST00000619869.1	2.60931e-11	4.77531e-09	-0.751035	0.112648	7.6642	0.184444	0.00209197	0.0169425	0.0080978	0.0169425
ITGA9	ENST00000264741.10	3.01455e-11	5.45857e-09	-0.875546	0.131743	5.65178	0.250802	0.0043719	0.0216624	0.0163799	0.0216624
CNTN1	ENST00000348761.2	3.13632e-11	5.66407e-09	-0.856259	0.128954	5.7344	0.234739	0.0093338	0.00914726	0.01561	0.01561
PDE4B	ENST00000371045.9	3.26563e-11	5.86665e-09	-1.67275	0.252146	5.81344	0.915725	0.00592624	0.0894402	0.0149546	0.0894402
GRIK3	ENST00000373091.8	3.33309e-11	5.97216e-09	-1.57116	0.236939	4.14802	0.762167	0.0269613	4.6991e-05	0.0572491	0.0572491
AIG1	ENST00000357847.8	3.53274e-11	6.29692e-09	-1.06323	0.160549	5.34362	0.370066	0.00839516	0.0302686	0.0203001	0.0302686
ADCY9	ENST00000294016.8	3.59452e-11	6.3904e-09	-0.726116	0.109687	5.84084	0.16373	0.00330329	0.00364216	0.0147435	0.0147435
TRDN	ENST00000546248.5	4.01875e-11	7.08937e-09	-1.3598	0.205924	6.42297	0.605601	0.00307828	0.0605291	0.0114437	0.0605291
FAM171B	ENST00000304698.10	4.37698e-11	7.66206e-09	-0.760974	0.115461	6.40781	0.189722	0.00177879	0.0182182	0.0115143	0.0182182
HSD11B2	ENST00000326152.6	4.53634e-11	7.90062e-09	-1.12953	0.17152	4.72963	0.417179	0.0119303	0.0311064	0.0321982	0.0321982
TMEM63C	ENST00000298351.5	4.63272e-11	8.048e-09	-1.17543	0.178575	4.60373	0.425061	0.0120245	0.00118907	0.0358089	0.0358089
MYLIP	ENST00000356840.8	5.17458e-11	8.85448e-09	-0.924633	0.140825	6.04102	0.280282	0.00247911	0.0272685	0.0134042	0.0272685
SEMA6B	ENST00000586582.6	5.46601e-11	9.30663e-09	-0.797524	0.121617	6.35592	0.208562	0.0039184	0.0182677	0.011758	0.0182677
CAMKV	ENST00000488336.5	6.56236e-11	1.09553e-08	-0.890599	0.136379	6.25845	0.260269	0.0126585	0.0152403	0.0122301	0.0152403
SKIL	ENST00000490989.1	6.62257e-11	1.10289e-08	-1.42604	0.218417	4.44104	0.667324	0.025587	0.0459723	0.0416315	0.0459723
NES	ENST00000368223.4	6.6862e-11	1.11079e-08	-1.10776	0.169706	8.48256	0.4027	0.00028251	0.0429176	0.00828392	0.0429176
RASL11B	ENST00000248706.5	6.77186e-11	1.11958e-08	-0.993341	0.152222	6.55219	0.323824	0.00364597	0.0311112	0.0108505	0.0311112
PHC1	ENST00000540809.1	6.84112e-11	1.12831e-08	-1.1642	0.178446	5.05916	0.426864	0.0227067	0.00261245	0.0250578	0.0250578
GRPR	ENST00000380289.2	7.32831e-11	1.20286e-08	-1.3762	0.211275	5.19346	0.621744	0.00797992	0.0589761	0.0227194	0.0589761
GABRA3	ENST00000370314.9	7.5519e-11	1.2366e-08	-1.01823	0.156428	5.04176	0.32054	0.0113263	0.000552388	0.0253781	0.0253781
NHSL2	ENST00000631375.1	8.29234e-11	1.3546e-08	-1.198	0.184444	5.66672	0.452257	0.0347958	-0.00767651	0.0162335	0.0162335
DNMT3B	ENST00000348286.6	8.41321e-11	1.37107e-08	-1.55764	0.239895	6.85308	0.796932	0.0251151	0.061209	0.00969671	0.061209
VWA1	ENST00000338660.5	8.4456e-11	1.37308e-08	-0.878488	0.135309	5.4257	0.237306	0.00839958	-0.00116939	0.0190633	0.0190633
SLC2A12	ENST00000275230.5	9.43263e-11	1.52992e-08	-1.0567	0.163177	4.82803	0.360954	0.0101611	0.022304	0.0297789	0.0297789
PELI2	ENST00000267460.9	1.00959e-10	1.61832e-08	-0.613143	0.094833	6.46148	0.123575	0.00179625	0.0116937	0.0112654	0.0116937
PIP4P2	ENST00000285419.8	1.00845e-10	1.61832e-08	-1.37849	0.213201	4.61544	0.624616	0.0228166	0.0453655	0.0354444	0.0453655
GCNT4	ENST00000652361.1	1.03269e-10	1.65148e-08	-4.73807	0.73321	2.31253	7.28611	0.205712	0.48344	0.600684	0.600684
TTC39C	ENST00000304621.10	1.04934e-10	1.67421e-08	-1.23578	0.191307	5.1648	0.502065	0.0310917	0.0238061	0.0232013	0.0238061
CREB3L1	ENST00000621158.4	1.28286e-10	2.02786e-08	-1.20589	0.187565	5.51335	0.47847	0.00674315	0.0460279	0.0179076	0.0460279
HAPLN3	ENST00000359595.7	1.33842e-10	2.11082e-08	-1.28303	0.199763	5.322	0.541735	0.0114276	0.0484306	0.0206399	0.0484306
PRKAR2B	ENST00000265717.5	1.44282e-10	2.24955e-08	-1.05492	0.16454	5.99749	0.366343	0.0016767	0.0389335	0.0136693	0.0389335
PRKAR2B	ENST00000639737.2	1.44282e-10	2.24955e-08	-1.05492	0.16454	5.99749	0.366343	0.0016767	0.0389335	0.0136693	0.0389335
SCUBE1	ENST00000360835.9	1.70874e-10	2.6401e-08	-1.39353	0.218234	4.25006	0.629216	0.0205888	0.0377134	0.0508504	0.0508504
SHROOM3	ENST00000296043.7	1.76015e-10	2.7134e-08	-0.615997	0.0965372	7.26077	0.125019	0.00147432	0.0125048	0.00864891	0.0125048
COL4A4	ENST00000396625.4	1.95403e-10	3.00552e-08	-1.14103	0.179269	4.57823	0.414838	0.0115806	0.0187362	0.0366253	0.0366253
ABAT	ENST00000268251.13	2.02323e-10	3.09803e-08	-0.807413	0.12696	5.43018	0.201423	0.00517819	0.00213207	0.0190002	0.0190002
SEPHS1	ENST00000327347.10	2.18647e-10	3.33308e-08	-0.633407	0.0997863	9.0784	0.13231	0.000355398	0.0145806	0.00961592	0.0145806
CCDC80	ENST00000206423.7	2.47045e-10	3.70817e-08	-0.9524	0.150486	5.19506	0.284447	0.0112763	0.00413214	0.0226928	0.0226928
DDIT4L	ENST00000273990.6	2.76823e-10	4.10118e-08	-1.08901	0.172551	4.67781	0.358274	0.0110551	-0.00794191	0.0336058	0.0336058
SFRP1	ENST00000379845.3	3.09566e-10	4.5469e-08	-1.73986	0.276435	6.86623	0.999833	0.0305361	0.0840886	0.0096542	0.0840886
PAK3	ENST00000372007.10	3.32058e-10	4.84606e-08	-1.49545	0.238014	4.39453	0.738892	0.0235823	0.061394	0.0436025	0.061394
BCL6B	ENST00000293805.9	3.35209e-10	4.88164e-08	-1.40253	0.223278	4.25886	0.649953	0.0175558	0.0572238	0.050353	0.0572238
TUBB4A	ENST00000264071.7	3.39191e-10	4.92914e-08	-0.589655	0.0938983	6.38996	0.114596	0.00162768	0.0112324	0.0115976	0.0115976
TFDP2	ENST00000479040.5	3.78634e-10	5.456e-08	-0.765917	0.1223	5.91701	0.185818	0.00824078	0.00404548	0.0141953	0.0141953
RAPGEF2	ENST00000644902.1	3.81419e-10	5.48459e-08	-0.791244	0.126368	6.67651	0.195097	0.0136231	-0.00452675	0.01033	0.01033
BTBD11	ENST00000357167.8	3.85547e-10	5.53232e-08	-1.14804	0.183399	5.21712	0.435758	0.0177309	0.0327219	0.0223273	0.0327219
TPM1	ENST00000558910.3	4.06722e-10	5.82396e-08	-1.1729	0.187621	5.02689	0.45495	0.0135838	0.0392187	0.0256554	0.0392187
NRP2	ENST00000272849.7	4.27637e-10	6.09793e-08	-1.31392	0.210443	4.45438	0.53497	0.0253354	-0.0040186	0.041094	0.041094
ABHD12B	ENST00000555292.1	4.55453e-10	6.45424e-08	-0.593495	0.095207	6.78589	0.116548	0.00185692	0.0117396	0.0099237	0.0117396
CDON	ENST00000531738.5	4.78004e-10	6.75981e-08	-0.749949	0.120451	5.83621	0.174318	0.00698405	4.28458e-06	0.0147787	0.0147787
GABRP	ENST00000521009.5	4.92945e-10	6.95673e-08	-0.658078	0.105778	7.85986	0.143347	0.000414777	0.0163686	0.00798579	0.0163686
ZNF385D	ENST00000281523.8	5.18936e-10	7.29344e-08	-1.36709	0.220028	4.22756	0.591288	0.0204603	0.0177982	0.052158	0.052158
RASA3	ENST00000334062.8	5.33914e-10	7.47327e-08	-0.658729	0.106096	5.76829	0.135982	0.00156445	0.00569227	0.0153201	0.0153201
RASA3	ENST00000630618.2	5.33914e-10	7.47327e-08	-0.658729	0.106096	5.76829	0.135982	0.00156445	0.00569227	0.0153201	0.0153201
ARSJ	ENST00000315366.8	5.5802e-10	7.79474e-08	-1.52669	0.246167	4.21058	0.710272	0.0377159	-0.0239203	0.0531813	0.0531813
RND3	ENST00000263895.8	6.20227e-10	8.59353e-08	-1.38496	0.223915	6.59419	0.635601	0.0115099	0.0636972	0.0106674	0.0636972
CACNG8	ENST00000270458.2	7.29213e-10	1.00023e-07	-0.804796	0.130657	5.34764	0.20437	0.00536958	0.00720663	0.0202373	0.0202373
DEPTOR	ENST00000286234.6	7.772e-10	1.0618e-07	-1.54291	0.2509	4.05857	0.745536	0.0302434	0.00895693	0.0641829	0.0641829
LRP8	ENST00000354412.7	8.59075e-10	1.16899e-07	-1.43611	0.234138	5.24047	0.654692	0.060286	-0.0153277	0.021945	0.021945
SERPINB4	ENST00000341074.9	1.02224e-09	1.38004e-07	-1.56662	0.256574	4.2239	0.803776	0.0463699	0.0379928	0.0523756	0.0523756
MAF	ENST00000393350.1	1.05961e-09	1.42768e-07	-1.34589	0.220632	4.23183	0.592889	0.0211124	0.0407145	0.0519054	0.0519054
MAP3K5	ENST00000359015.5	1.08257e-09	1.4529e-07	-1.2238	0.20073	4.57559	0.497654	0.0130881	0.0473506	0.0367118	0.0473506
FAM124A	ENST00000615498.4	1.08952e-09	1.45936e-07	-1.29873	0.213057	4.8644	0.560484	0.0126289	0.0554608	0.028957	0.0554608
TMEM132B	ENST00000299308.7	1.1449e-09	1.52459e-07	-0.871053	0.143082	5.2212	0.250964	0.00844858	0.0207314	0.0222602	0.0222602
BNIP3P17	ENST00000605448.1	1.18363e-09	1.57005e-07	-0.863213	0.141919	5.15988	0.244138	0.00692641	0.0188194	0.023285	0.023285
VASH2	ENST00000366965.6	1.19955e-09	1.5881e-07	-0.799254	0.13145	6.77813	0.212377	0.00880767	0.0171108	0.00995101	0.0171108
TTC39C	ENST00000584250.1	1.20638e-09	1.59405e-07	-1.56511	0.257445	4.55033	0.814403	0.0269688	0.0724481	0.0375563	0.0724481
NA	ENST00000649066.1	1.2111e-09	1.5972e-07	-1.11375	0.18322	6.92635	0.412418	0.00162785	0.0487267	0.00946775	0.0487267
TMEM132D	ENST00000422113.7	1.28617e-09	1.68969e-07	-1.01335	0.166968	4.72089	0.327415	0.00938887	0.0148022	0.0324286	0.0324286
EDNRB	ENST00000626030.1	1.34231e-09	1.75671e-07	-1.39179	0.229584	5.07397	0.644376	0.0235302	0.0555327	0.0247889	0.0555327
ERBB2	ENST00000269571.9	1.40037e-09	1.82919e-07	-1.4488	0.239256	7.07952	0.698396	0.0527621	0.0331027	0.00904846	0.0331027
NA	ENST00000649668.1	1.42127e-09	1.84592e-07	-0.769626	0.127147	6.22174	0.197097	0.00375268	0.0204968	0.0124145	0.0204968
KIAA0930	ENST00000391627.6	1.9814e-09	2.53493e-07	-0.798532	0.133104	6.74592	0.212556	0.00767394	0.0189009	0.0100668	0.0189009
AKAP1	ENST00000337714.8	2.03501e-09	2.59382e-07	-0.856185	0.142817	7.3714	0.244392	0.00102484	0.0295701	0.00845301	0.0295701
GULP1	ENST00000451191.5	2.0645e-09	2.62165e-07	-0.91995	0.153513	5.03251	0.269884	0.00979932	0.0101894	0.0255501	0.0255501
C1orf94	ENST00000373374.7	2.21798e-09	2.79066e-07	-1.52186	0.25445	4.49488	0.77251	0.022166	0.074951	0.0395335	0.074951
CACNG4	ENST00000262138.4	2.33029e-09	2.91589e-07	-1.84878	0.309527	4.58558	1.14037	0.014929	0.128782	0.0363867	0.128782
RALB	ENST00000272519.10	2.37708e-09	2.96901e-07	-0.761491	0.12756	6.08012	0.187618	0.011231	0.00584037	0.0131762	0.0131762
SLC16A10	ENST00000368851.10	2.47144e-09	3.08124e-07	-0.807974	0.13549	5.32271	0.214743	0.00690785	0.0167126	0.0206286	0.0206286
PDZD4	ENST00000393758.6	2.81218e-09	3.46192e-07	-0.86412	0.145421	7.4374	0.249388	0.00628479	0.0254361	0.00835265	0.0254361
CXCL5	ENST00000296027.5	2.97455e-09	3.64215e-07	-1.82982	0.308414	4.55866	1.11861	0.0177318	0.124947	0.0372742	0.124947
RAB20	ENST00000267328.5	3.06226e-09	3.74285e-07	-0.747183	0.126038	5.69249	0.186547	0.00388032	0.0199481	0.0159888	0.0199481
H2AJ	ENST00000544848.2	3.14528e-09	3.83747e-07	-0.870897	0.147016	5.08798	0.247941	0.00788315	0.0176197	0.0245373	0.0245373
PRPF39	ENST00000355765.10	3.18351e-09	3.8772e-07	-0.83176	0.140456	5.69569	0.223097	0.013633	0.00580331	0.015959	0.015959
ZBTB44	ENST00000527478.6	3.25272e-09	3.94744e-07	-0.611547	0.103331	7.23847	0.124487	0.00732338	0.00803974	0.00869268	0.00869268
SLC6A6	ENST00000649500.1	3.28029e-09	3.97385e-07	-0.874418	0.147783	8.28613	0.255589	0.0214681	0.0112915	0.00807996	0.0112915
MACF1	ENST00000469490.1	3.47642e-09	4.1966e-07	-0.843934	0.142862	5.47171	0.217393	0.0121778	-0.00752064	0.0184363	0.0184363
SEMG1	ENST00000372781.4	3.79304e-09	4.56271e-07	-1.37321	0.233025	4.10543	0.625291	0.0210807	0.0533933	0.0603701	0.0603701
SEMA6B	ENST00000586965.1	4.29907e-09	5.12637e-07	-1.01569	0.172965	5.36472	0.328926	0.0249045	-0.000609111	0.0199707	0.0199707
ETV5	ENST00000306376.10	4.34366e-09	5.16157e-07	-1.50983	0.257188	6.90101	0.763254	0.0017897	0.0974288	0.00954479	0.0974288
EXT1	ENST00000437196.1	4.58616e-09	5.43087e-07	-0.83515	0.14248	5.23351	0.222662	0.00839223	0.00838139	0.0220585	0.0220585
NEK3	ENST00000610828.5	4.95896e-09	5.82197e-07	-0.85997	0.14704	6.22297	0.247809	0.00348105	0.0289501	0.0124083	0.0289501
PTN	ENST00000348225.6	5.39398e-09	6.31105e-07	-0.658061	0.112787	5.87122	0.145179	0.00348216	0.0155993	0.0145184	0.0155993
FEZ1	ENST00000278919.7	5.5303e-09	6.4595e-07	-1.52213	0.261069	4.92202	0.77685	0.0154395	0.0867957	0.0277226	0.0867957
SYT16	ENST00000568344.5	5.77027e-09	6.71687e-07	-1.08088	0.185613	4.92257	0.391831	0.00929405	0.0423842	0.0277112	0.0423842
ADAMTS5	ENST00000284987.6	6.37386e-09	7.36935e-07	-4.54355	0.782475	1.96947	6.38071	0.0958216	0.138607	0.82258	0.82258
SLC29A1	ENST00000371755.8	6.39925e-09	7.38622e-07	-0.949374	0.163517	6.86175	0.302479	0.022903	0.0172036	0.00966861	0.0172036
RASAL2	ENST00000367649.7	6.89581e-09	7.91441e-07	-0.661186	0.114127	5.92526	0.144982	0.00539828	0.0118921	0.0141391	0.0141391
FADS2	ENST00000278840.9	7.03725e-09	8.0547e-07	-0.627248	0.108332	8.45937	0.132115	0.00172061	0.0158833	0.0082543	0.0158833
FAM124A	ENST00000322475.12	7.65831e-09	8.75093e-07	-0.971192	0.168148	7.02238	0.316892	0.00106287	0.0413478	0.00919578	0.0413478
GNG7	ENST00000382159.8	7.71791e-09	8.78968e-07	-0.695605	0.120461	5.5244	0.148924	0.00399331	0.000712317	0.0177731	0.0177731
CLIP3	ENST00000360535.9	7.96414e-09	9.05504e-07	-0.59083	0.102411	6.70669	0.11731	0.00128586	0.0144461	0.0102132	0.0144461
DDX6	ENST00000526070.2	7.98942e-09	9.06872e-07	-0.648675	0.112448	6.44349	0.136135	0.00761816	0.00475841	0.0113485	0.0113485
SHISA7	ENST00000376325.8	9.48123e-09	1.06911e-06	-1.76415	0.307356	3.73848	0.948486	0.03923	-0.0207084	0.102472	0.102472
B4GALT6	ENST00000578114.1	9.50448e-09	1.06997e-06	-0.811359	0.141368	5.24496	0.220518	0.00810545	0.0206784	0.0218719	0.0218719
FGFBP3	ENST00000311575.5	9.68778e-09	1.08882e-06	-1.09734	0.191304	6.92746	0.405163	0.00116136	0.0537344	0.00946443	0.0537344
NSG1	ENST00000433139.6	1.09588e-08	1.22364e-06	-0.705442	0.123433	6.00815	0.167578	0.00580622	0.0170474	0.0136033	0.0170474
PDE4DIP	ENST00000529945.2	1.11619e-08	1.24428e-06	-0.777942	0.136193	6.13364	0.203817	0.00449722	0.0233256	0.0128776	0.0233256
KCNJ6	ENST00000609713.2	1.13836e-08	1.26282e-06	-1.43668	0.251664	4.03896	0.67911	0.0291019	0.0457702	0.0659003	0.0659003
RYR2	ENST00000366574.7	1.16877e-08	1.29446e-06	-0.90218	0.15816	5.91175	0.274196	0.00821732	0.0293046	0.0142315	0.0293046
VSNL1	ENST00000295156.8	1.17707e-08	1.29945e-06	-0.748533	0.131252	7.00764	0.188763	0.00133934	0.0245014	0.00923551	0.0245014
EXPH5	ENST00000265843.9	1.1805e-08	1.30007e-06	-1.37605	0.241306	5.07373	0.637929	0.0139544	0.0733883	0.0247933	0.0733883
MRAP2	ENST00000257776.5	1.18143e-08	1.30007e-06	-0.869789	0.152531	5.11223	0.254879	0.0074474	0.0274511	0.0241079	0.0274511
BCAR1	ENST00000538440.6	1.19691e-08	1.31499e-06	-0.797274	0.139869	6.34003	0.199439	0.0175113	-0.00657984	0.0118335	0.0118335
NYNRIN	ENST00000382554.4	1.42827e-08	1.55173e-06	-0.635527	0.112087	6.87464	0.136245	0.00100349	0.0178416	0.00962737	0.0178416
MACF1	ENST00000372925.6	1.42815e-08	1.55173e-06	-0.611602	0.107867	7.92423	0.12618	0.00458435	0.0128685	0.00797028	0.0128685
C1orf21	ENST00000648109.1	1.50229e-08	1.62699e-06	-0.78599	0.138836	5.89564	0.208464	0.0053283	0.0235847	0.0143437	0.0235847
INO80D	ENST00000403263.6	1.58314e-08	1.70914e-06	-0.746445	0.13206	6.52967	0.188082	0.000847668	0.0253122	0.0109519	0.0253122
INO80D	ENST00000636453.2	1.58314e-08	1.70914e-06	-0.746445	0.13206	6.52967	0.188082	0.000847668	0.0253122	0.0109519	0.0253122
MAGEL2	ENST00000650528.1	1.6159e-08	1.73629e-06	-1.61216	0.285399	3.71052	0.80633	0.0152218	0.0180467	0.106957	0.106957
BCR	ENST00000359540.7	1.61384e-08	1.73629e-06	-0.675438	0.119568	6.60377	0.152797	0.010818	0.00909714	0.0106266	0.0106266
NA	ENST00000532292.4	1.6159e-08	1.73629e-06	-1.61216	0.285399	3.71052	0.80633	0.0152218	0.0180467	0.106957	0.106957
PHLPP2	ENST00000568954.5	1.84334e-08	1.95308e-06	-0.656887	0.116757	6.44957	0.13984	0.00912789	0.00385987	0.0113204	0.0113204
AP1S2	ENST00000380291.5	2.34044e-08	2.44945e-06	-0.613632	0.109876	7.01409	0.127451	0.00101155	0.0170977	0.00921805	0.0170977
BX322639.1	ENST00000609841.1	2.40455e-08	2.50887e-06	-0.775257	0.138934	5.68953	0.186779	0.0129375	-0.00484724	0.0160164	0.0160164
CACNA1I	ENST00000404898.5	2.45792e-08	2.55676e-06	-1.25266	0.224644	4.17431	0.478154	0.0202195	-0.0109648	0.0554778	0.0554778
ADCY8	ENST00000286355.10	2.57473e-08	2.67421e-06	-1.12347	0.201768	5.80505	0.427508	0.0126449	0.0484204	0.0150208	0.0484204
UNC13A	ENST00000519716.6	2.77615e-08	2.87066e-06	-0.739488	0.133121	7.3279	0.185318	0.000682492	0.0258994	0.00852584	0.0258994
HEG1	ENST00000311127.9	2.77031e-08	2.87066e-06	-0.716845	0.129037	5.66206	0.162928	0.00869679	0.00226306	0.0162788	0.0162788
HAPLN1	ENST00000274341.8	2.77646e-08	2.87066e-06	-1.86058	0.334939	3.68841	1.06612	0.0576296	-0.0231279	0.110646	0.110646
SLITRK1	ENST00000377084.3	2.91221e-08	3.00195e-06	-3.09941	0.558791	3.05205	3.25659	0.197612	0.270759	0.269381	0.270759
GPM6B	ENST00000454189.6	3.53588e-08	3.60144e-06	-0.67997	0.123349	6.59201	0.156966	0.00355503	0.0192673	0.0106767	0.0192673
FBXO2	ENST00000354287.5	3.57107e-08	3.63188e-06	-0.685433	0.124379	6.16652	0.15951	0.00283906	0.0203661	0.012701	0.0203661
SLC8A1	ENST00000406785.6	3.68966e-08	3.73584e-06	-2.08866	0.379404	3.47457	1.35545	0.0629406	-0.00455564	0.152981	0.152981
NFE2L3	ENST00000606261.1	3.76096e-08	3.79153e-06	-0.833553	0.151508	7.1409	0.235989	0.00273918	0.0316926	0.00890184	0.0316926
CCNJL	ENST00000257536.12	3.98689e-08	4.01052e-06	-0.795435	0.14485	6.15539	0.204977	0.0187122	0.000240195	0.0127602	0.0127602
CRYM	ENST00000543948.5	4.09971e-08	4.10247e-06	-1.33556	0.243426	3.95175	0.550841	0.0144197	0.00523767	0.0744648	0.0744648
NA	ENST00000639592.1	4.09971e-08	4.10247e-06	-1.33556	0.243426	3.95175	0.550841	0.0144197	0.00523767	0.0744648	0.0744648
HDAC7	ENST00000459625.5	4.30289e-08	4.28075e-06	-0.991556	0.181009	4.73631	0.323589	0.0171224	0.0186705	0.0320239	0.0320239
UGP2	ENST00000337130.9	4.33441e-08	4.29961e-06	-0.656879	0.119942	7.48737	0.14671	0.00891242	0.0126666	0.00828466	0.0126666
MED9	ENST00000624097.1	4.59143e-08	4.52873e-06	-0.955542	0.174801	5.73227	0.310585	0.00527959	0.0405536	0.0156288	0.0405536
LITAF	ENST00000413364.6	4.71784e-08	4.63296e-06	-0.764081	0.1399	7.32584	0.198632	0.0103522	0.0190057	0.00852942	0.0190057
FLT1	ENST00000282397.9	4.77741e-08	4.68473e-06	-1.05798	0.193791	6.8465	0.380864	0.0026269	0.0537055	0.00971821	0.0537055
MBOAT1	ENST00000324607.7	5.07598e-08	4.94916e-06	-0.726405	0.133319	5.28707	0.169828	0.00546706	0.00894443	0.0211938	0.0211938
GABRP	ENST00000521481.5	5.17369e-08	5.03725e-06	-0.719169	0.132073	8.26852	0.176093	0.00026606	0.0258989	0.00806677	0.0258989
PDPN	ENST00000617617.4	5.28064e-08	5.13407e-06	-0.887557	0.163106	6.91381	0.26405	0.0303998	0.00425325	0.00950561	0.00950561
NADSYN1	ENST00000525593.5	5.37274e-08	5.20776e-06	-0.876103	0.161092	6.21591	0.261408	0.0031648	0.0357614	0.0124442	0.0357614
SPATS2L	ENST00000409397.6	5.46443e-08	5.27601e-06	-1.69764	0.312325	5.12813	0.98165	0.0614459	0.0848743	0.0238304	0.0848743
PIF1	ENST00000560444.1	5.68658e-08	5.48203e-06	-1.04753	0.192973	4.47312	0.347587	0.0154985	0.0074904	0.0403591	0.0403591
EIF4E3	ENST00000295612.7	5.80633e-08	5.58174e-06	-0.634858	0.117032	5.86337	0.126825	0.00596891	0.00142107	0.0145757	0.0145757
VCL	ENST00000211998.9	5.81736e-08	5.58451e-06	-1.01708	0.187504	8.99541	0.352526	0.000241553	0.052495	0.00935796	0.052495
CCDC184	ENST00000316554.4	5.89911e-08	5.64714e-06	-4.38669	0.809078	1.89103	5.95627	0.101999	0.127209	0.879911	0.879911
RGS5	ENST00000313961.10	5.91291e-08	5.65245e-06	-1.10783	0.204343	6.47887	0.418292	0.00225257	0.0603815	0.0111853	0.0603815
FABP7	ENST00000368444.8	6.02301e-08	5.74166e-06	-0.906808	0.167366	4.73583	0.280304	0.00842726	0.0335897	0.0320363	0.0335897
SKIL	ENST00000259119.9	6.0981e-08	5.80516e-06	-0.766738	0.141572	7.50232	0.200417	0.00711268	0.0229511	0.00826564	0.0229511
RYR1	ENST00000355481.8	6.42257e-08	6.10555e-06	-0.797218	0.147452	5.95248	0.203135	0.018656	-0.00307156	0.0139573	0.0139573
TTC9	ENST00000256367.3	6.55234e-08	6.21166e-06	-0.852744	0.157827	6.83949	0.248043	0.00127618	0.0360878	0.00974128	0.0360878
EPHX1	ENST00000614058.4	6.67298e-08	6.31727e-06	-0.775924	0.143696	6.1881	0.205395	0.0175876	0.0133852	0.0125876	0.0133852
CPEB4	ENST00000334035.9	7.0825e-08	6.67726e-06	-0.796886	0.147871	5.33616	0.207707	0.0123817	0.0091172	0.020417	0.020417
PWWP2A	ENST00000456329.7	7.09585e-08	6.68064e-06	-0.656986	0.121919	5.73543	0.147326	0.00529775	0.0169985	0.015601	0.0169985
IL6R	ENST00000368485.8	7.2926e-08	6.85645e-06	-0.675085	0.125392	5.50913	0.15559	0.00415966	0.019425	0.0179595	0.019425
TPH2	ENST00000547348.5	7.45664e-08	7.00106e-06	-0.764357	0.142079	5.17634	0.185867	0.00727331	0.00596953	0.0230063	0.0230063
DIAPH2	ENST00000324765.13	7.58705e-08	7.10401e-06	-0.803776	0.149493	7.00224	0.220635	0.00133315	0.0321891	0.00925027	0.0321891
ZNF398	ENST00000426851.6	7.83051e-08	7.31196e-06	-0.875148	0.16294	7.43409	0.261625	0.000835111	0.0389889	0.00835739	0.0389889
RND3	ENST00000375734.6	8.41871e-08	7.81855e-06	-1.2092	0.225684	5.73823	0.458258	0.0608233	-0.036309	0.0155766	0.0155766
ZMAT4	ENST00000315769.11	8.60948e-08	7.98488e-06	-4.69771	0.877444	1.65571	6.64702	0.0894381	-0.0563537	1.06542	1.06542
TERF1	ENST00000276603.10	8.63046e-08	7.99351e-06	-1.11978	0.20917	8.24115	0.428673	0.00148695	0.0641413	0.00804788	0.0641413
MMP24	ENST00000246186.8	8.82835e-08	8.16575e-06	-1.17118	0.218939	6.15908	0.469017	0.003094	0.0688074	0.0127406	0.0688074
C9orf135	ENST00000377197.8	9.21113e-08	8.49683e-06	-1.92236	0.359882	4.29367	1.22044	0.14581	-0.00606299	0.0484629	0.0484629
SCIN	ENST00000297029.10	9.36192e-08	8.62431e-06	-0.980722	0.183701	4.83561	0.32904	0.0115384	0.0390806	0.0296047	0.0390806
UCP2	ENST00000310473.8	9.44028e-08	8.68481e-06	-0.631581	0.118336	6.49233	0.136473	0.00273637	0.0182688	0.0111233	0.0182688
ZNF525	ENST00000467003.1	9.52303e-08	8.74917e-06	-0.736062	0.137953	6.82086	0.185374	0.00630283	0.0222437	0.00980349	0.0222437
GJA5	ENST00000621517.1	9.62316e-08	8.82931e-06	-4.34249	0.814162	2.11043	5.73326	0.268819	-0.173717	0.72547	0.72547
ACAT2	ENST00000367048.4	9.70259e-08	8.87839e-06	-0.732583	0.137388	7.49898	0.183654	0.00131995	0.0269934	0.00826984	0.0269934
PCDH7	ENST00000511884.6	9.84898e-08	9.00031e-06	-2.17812	0.408692	3.45681	1.44332	0.0935009	-0.0684292	0.157043	0.157043
IDO1	ENST00000518237.6	1.02814e-07	9.35797e-06	-1.68656	0.316923	5.07985	0.973875	0.0862078	0.0644524	0.024683	0.0644524
CHPF2	ENST00000035307.6	1.04589e-07	9.4943e-06	-0.687572	0.129278	5.40062	0.154107	0.0056435	0.00970711	0.0194256	0.0194256
CXCL6	ENST00000226317.10	1.06646e-07	9.66824e-06	-1.72818	0.32515	3.75133	0.983782	0.0581085	0.0516432	0.100475	0.100475
ENSA	ENST00000271690.12	1.07618e-07	9.74343e-06	-0.853718	0.160674	6.63252	0.24963	0.0221917	0.0165324	0.0105068	0.0165324
PIPOX	ENST00000323372.9	1.10787e-07	9.99071e-06	-0.939939	0.177077	6.63462	0.302673	0.00171818	0.0453163	0.0104982	0.0453163
EIF4E3	ENST00000389826.7	1.14615e-07	1.02952e-05	-0.741614	0.139878	5.442	0.18203	0.0105128	0.0107777	0.0188358	0.0188358
SEC24D	ENST00000280551.11	1.19261e-07	1.06984e-05	-1.11769	0.211098	7.2245	0.428241	0.0064293	0.0604143	0.00872087	0.0604143
HNRNPC	ENST00000554455.5	1.23824e-07	1.10933e-05	-0.731932	0.13842	7.74405	0.183709	0.00532226	0.0234179	0.00804023	0.0234179
LMCD1	ENST00000397386.7	1.311e-07	1.16688e-05	-1.02967	0.195114	4.68907	0.346745	0.0238128	0.0120326	0.0332913	0.0332913
ENSA	ENST00000362052.7	1.34615e-07	1.19505e-05	-1.35822	0.257607	4.19656	0.585868	0.0454919	-0.00494469	0.0540505	0.0540505
NAV1	ENST00000367295.5	1.35181e-07	1.19853e-05	-0.597644	0.113369	7.03791	0.122577	0.00269398	0.0165848	0.0091547	0.0165848
KATNBL1	ENST00000256544.8	1.36024e-07	1.20444e-05	-0.852199	0.161691	5.08735	0.224994	0.0146675	-0.00576645	0.0245485	0.0245485
TMOD2	ENST00000249700.9	1.39738e-07	1.23254e-05	-0.689999	0.131039	5.36689	0.160289	0.00581998	0.0160045	0.0199369	0.0199369
COMMD7	ENST00000278980.10	1.40432e-07	1.23706e-05	-0.732056	0.13905	5.98564	0.183974	0.00904074	0.0199618	0.0137437	0.0199618
GRIN2D	ENST00000263269.3	1.48972e-07	1.30725e-05	-1.36885	0.260543	6.01831	0.643584	0.00291281	0.0989115	0.013541	0.0989115
SRRM3	ENST00000612155.1	1.56311e-07	1.36465e-05	-0.982144	0.187255	4.64378	0.293422	0.0180084	-0.0129586	0.034588	0.034588
GNA14	ENST00000341700.7	1.57713e-07	1.37338e-05	-1.22298	0.233245	5.81229	0.513988	0.00350682	0.0780982	0.0149636	0.0780982
ORAI2	ENST00000478730.6	1.62559e-07	1.40842e-05	-0.668048	0.127545	5.88288	0.153408	0.00541862	0.0189831	0.0144343	0.0189831
BRWD1	ENST00000341322.4	1.66198e-07	1.4345e-05	-0.748947	0.143102	5.14141	0.182585	0.00711657	0.0107688	0.0236009	0.0236009
TENM3	ENST00000502950.1	1.69658e-07	1.46068e-05	-0.59761	0.114269	6.09372	0.11147	0.0064873	-0.00107655	0.0130989	0.0130989
USP32	ENST00000590133.5	1.73589e-07	1.48704e-05	-0.810147	0.155034	6.01329	0.225744	0.00954126	0.0265122	0.0135716	0.0265122
PLEKHG3	ENST00000247226.13	1.99168e-07	1.68507e-05	-0.656857	0.126316	5.68983	0.135823	0.00791993	6.14721e-05	0.0160136	0.0160136
FAM98A	ENST00000238823.13	2.15567e-07	1.81262e-05	-0.683057	0.131727	7.51595	0.160792	0.000695741	0.0253324	0.00824882	0.0253324
TAFA4	ENST00000295569.12	2.32366e-07	1.94195e-05	-0.861477	0.166585	4.76393	0.22922	0.0103063	-0.0020848	0.0313197	0.0313197
RRAGD	ENST00000369415.8	2.34141e-07	1.95228e-05	-0.969207	0.187469	5.45757	0.298865	0.0340928	-0.0127718	0.018624	0.018624
KLHL7	ENST00000521082.5	2.34173e-07	1.95228e-05	-1.13339	0.219228	6.55514	0.443048	0.00662206	0.0654693	0.0108374	0.0654693
PLSCR3	ENST00000619711.5	2.36102e-07	1.95882e-05	-1.08163	0.209278	4.98054	0.375066	0.0391525	-0.00904513	0.0265435	0.0265435
PLSCR3	ENST00000639874.2	2.36102e-07	1.95882e-05	-1.08163	0.209278	4.98054	0.375066	0.0391525	-0.00904513	0.0265435	0.0265435
GNAZ	ENST00000615612.2	2.44213e-07	2.02121e-05	-0.843529	0.163409	4.80692	0.233332	0.00978072	0.015056	0.0302728	0.0302728
BHLHE41	ENST00000242728.5	2.55105e-07	2.09521e-05	-1.45514	0.282337	3.80034	0.676936	0.0263291	0.0258052	0.0932419	0.0932419
AC055839.2	ENST00000568641.1	2.55297e-07	2.09521e-05	-0.766582	0.148742	5.06898	0.180465	0.00830699	-0.00309353	0.0248792	0.0248792
APP	ENST00000348990.9	2.69754e-07	2.20637e-05	-0.724639	0.140886	6.91008	0.169177	0.0202564	-0.00569875	0.00951695	0.00951695
TRPC6	ENST00000344327.8	2.77199e-07	2.25871e-05	-1.97917	0.385178	3.82888	1.26529	0.133244	-0.0205561	0.0892989	0.0892989
NIPAL3	ENST00000374399.9	2.88428e-07	2.33907e-05	-0.68965	0.134412	5.43446	0.164365	0.00595161	0.0211484	0.0189403	0.0211484
KBTBD7	ENST00000379483.3	3.29604e-07	2.64169e-05	-0.591005	0.115754	6.25252	0.120865	0.0020459	0.0180527	0.0122596	0.0180527
SFRP1	ENST00000220772.8	3.32965e-07	2.66551e-05	-1.54927	0.303555	7.536	0.83065	0.00528055	0.132938	0.00822499	0.132938
NEDD4L	ENST00000456173.6	3.34447e-07	2.67113e-05	-1.292	0.253188	4.8167	0.52051	0.066114	-0.0414493	0.0300423	0.0300423
BLCAP	ENST00000373537.7	3.49e-07	2.77763e-05	-0.705242	0.138422	5.43719	0.172203	0.005939	0.0228021	0.0189024	0.0228021
PIANP	ENST00000534837.5	3.53299e-07	2.80858e-05	-0.974175	0.191295	5.03855	0.291024	0.0294528	-0.0215542	0.0254376	0.0254376
CHRDL1	ENST00000372045.5	3.8414e-07	3.03612e-05	-0.608983	0.119957	5.65323	0.113243	0.00521923	-0.00273804	0.0163655	0.0163655
FAT4	ENST00000394329.7	4.08692e-07	3.21533e-05	-0.673357	0.132947	6.3463	0.157233	0.00411917	0.0223931	0.0118037	0.0223931
CDH4	ENST00000614565.5	4.33772e-07	3.40091e-05	-1.36914	0.270929	4.85709	0.588328	0.0809846	-0.0485322	0.0291194	0.0291194
B3GAT1	ENST00000531778.1	4.55427e-07	3.55441e-05	-1.10984	0.220024	4.40731	0.403775	0.0295702	0.0132415	0.0430454	0.0430454
BCLAF1	ENST00000527536.5	5.05457e-07	3.91363e-05	-1.02207	0.203429	7.17075	0.358782	0.0532402	0.00349965	0.00883477	0.00883477
SKA2	ENST00000330137.12	5.16632e-07	3.99564e-05	-0.625099	0.124521	6.02979	0.135831	0.00350032	0.0197579	0.0134714	0.0197579
RAI14	ENST00000512629.5	5.64718e-07	4.33812e-05	-0.843569	0.168616	6.2455	0.2476	0.0288566	0.0137904	0.0122946	0.0137904
GLRX	ENST00000237858.11	5.80062e-07	4.44602e-05	-0.672208	0.134502	5.30784	0.152645	0.00627274	0.015085	0.0208636	0.0208636
FAM189A2	ENST00000645123.1	5.88454e-07	4.50529e-05	-1.77475	0.355307	3.51699	1.08437	0.0457513	0.128566	0.143614	0.143614
ZNF283	ENST00000588797.6	6.20498e-07	4.73032e-05	-4.73506	0.949915	1.67439	6.72911	0.303641	-0.300071	1.04987	1.04987
MMP9	ENST00000372330.3	6.24118e-07	4.74649e-05	-1.10995	0.222721	5.14048	0.429125	0.00611293	0.0682942	0.0236168	0.0682942
BCLAF1	ENST00000534762.5	6.49065e-07	4.92569e-05	-0.603782	0.121339	5.91555	0.122719	0.00787925	0.00881183	0.0142053	0.0142053
JADE1	ENST00000511647.5	6.63627e-07	5.02462e-05	-1.00145	0.201428	6.8556	0.349556	0.00491129	0.0559488	0.00968853	0.0559488
SLC7A14	ENST00000231706.6	6.72033e-07	5.07704e-05	-1.22613	0.246743	4.33723	0.52408	0.0188279	0.0724953	0.0462577	0.0724953
TRIM22	ENST00000480395.5	7.04966e-07	5.31411e-05	-1.06525	0.214768	4.49914	0.369606	0.0298129	0.00666078	0.0393753	0.0393753
RASD2	ENST00000216127.5	7.31084e-07	5.48081e-05	-1.48613	0.300052	3.76511	0.721169	0.0366644	0.0365767	0.0983822	0.0983822
SKIL	ENST00000426052.6	7.34052e-07	5.49703e-05	-0.745793	0.1506	6.56524	0.194079	0.00515531	0.0288654	0.0107928	0.0288654
TNIK	ENST00000470834.5	7.40821e-07	5.54167e-05	-0.756578	0.152833	5.86156	0.199753	0.0138597	0.0211774	0.014589	0.0211774
NCCRP1	ENST00000339852.5	7.61699e-07	5.68541e-05	-1.58832	0.321201	3.65119	0.824878	0.0376122	0.0474528	0.117143	0.117143
FOXP4	ENST00000307972.8	8.27317e-07	6.14838e-05	-0.818187	0.166001	5.58442	0.233896	0.0101788	0.0311557	0.0170823	0.0311557
NACAD	ENST00000490531.3	8.57951e-07	6.34847e-05	-0.650221	0.132113	5.79762	0.147781	0.00311197	0.0230688	0.0150801	0.0230688
HHLA1	ENST00000414222.1	8.77288e-07	6.47057e-05	-0.777456	0.158105	6.89762	0.211328	0.00110496	0.0363908	0.00955527	0.0363908
OR52A1	ENST00000328942.1	8.82833e-07	6.49746e-05	-4.42361	0.89982	1.64079	5.8948	0.136556	-0.106167	1.07796	1.07796
PIP4P2	ENST00000520014.1	8.89098e-07	6.53654e-05	-1.2527	0.254887	4.56089	0.548736	0.0551317	0.0423194	0.0371994	0.0423194
RNF152	ENST00000312828.4	9.15938e-07	6.70506e-05	-0.998358	0.203378	4.33521	0.311076	0.0156875	-0.000612748	0.0463563	0.0463563
DNER	ENST00000341772.5	9.29443e-07	6.78939e-05	-1.19016	0.242591	4.02755	0.434135	0.0213415	-0.009849	0.066934	0.066934
CSPG4	ENST00000308508.5	9.60627e-07	7.00225e-05	-1.06099	0.216549	4.85227	0.393982	0.0116254	0.0587149	0.0292273	0.0587149
PRDM14	ENST00000276594.2	9.68641e-07	7.05315e-05	-1.72229	0.351638	6.58214	1.03826	0.00247869	0.182995	0.0107191	0.182995
EPCAM	ENST00000456133.5	9.71787e-07	7.06853e-05	-5.30003	1.08224	1.95687	8.49874	0.925236	-0.835674	0.831637	0.831637
LNX1	ENST00000263925.7	9.89087e-07	7.16392e-05	-1.03659	0.211818	4.68299	0.376198	0.0227034	0.0445968	0.0334604	0.0445968
ETS1	ENST00000392668.8	1.01226e-06	7.32398e-05	-0.967366	0.197856	7.32263	0.327715	0.00143283	0.0572877	0.00853503	0.0572877
OGFRL1	ENST00000370435.5	1.02326e-06	7.39581e-05	-0.813623	0.166483	5.74382	0.225999	0.0260471	0.00820851	0.015528	0.015528
SLC1A3	ENST00000265113.9	1.05408e-06	7.58651e-05	-0.850019	0.174139	5.24683	0.251019	0.023645	0.0191791	0.0218416	0.0218416
TYRO3	ENST00000568490.1	1.11623e-06	8.00857e-05	-0.587634	0.120665	5.68192	0.109398	0.00575201	0.00150347	0.0160881	0.0160881
IDO1	ENST00000518804.5	1.16827e-06	8.32085e-05	-1.71243	0.352284	4.37131	1.02865	0.0374032	0.148753	0.0446469	0.148753
THY1	ENST00000584021.1	1.19754e-06	8.51161e-05	-2.88648	0.59441	3.28119	2.78231	0.328454	0.0250138	0.201531	0.201531
SENP2	ENST00000430355.5	1.21083e-06	8.58822e-05	-1.07367	0.2212	4.9699	0.404548	0.0139383	0.0594559	0.0267528	0.0594559
IRS4	ENST00000372129.3	1.23251e-06	8.68798e-05	-0.76446	0.15761	5.16321	0.205129	0.00539004	0.0318712	0.0232284	0.0318712
PBX1	ENST00000420696.6	1.26426e-06	8.87522e-05	-0.598469	0.123516	7.6867	0.125757	0.0106523	0.0122318	0.00807991	0.0122318
NPR1	ENST00000368680.4	1.40769e-06	9.83174e-05	-0.799368	0.16571	5.34009	0.224648	0.00497922	0.0362103	0.0203555	0.0362103
XYLT1	ENST00000261381.6	1.42452e-06	9.89873e-05	-0.896495	0.185935	5.64334	0.282597	0.00191242	0.0499455	0.016464	0.0499455
CLU	ENST00000523589.5	1.42338e-06	9.89873e-05	-0.606112	0.125705	6.14211	0.128806	0.010871	0.0123725	0.0128316	0.0128316
XYLT1	ENST00000644858.1	1.42452e-06	9.89873e-05	-0.896495	0.185935	5.64334	0.282597	0.00191242	0.0499455	0.016464	0.0499455
APOB	ENST00000233242.5	1.47046e-06	0.000101869	-1.67097	0.34702	3.68691	0.982151	0.0378219	0.142812	0.110902	0.142812
GABRA5	ENST00000335625.10	1.57199e-06	0.000108246	-0.676034	0.140786	5.6822	0.145886	0.0136456	-0.00267108	0.0160854	0.0160854
PLAU	ENST00000372764.4	1.61244e-06	0.000110586	-1.38764	0.289287	5.79361	0.678091	0.00442483	0.121106	0.0151123	0.121106
AIG1	ENST00000494282.6	1.66049e-06	0.000113427	-0.986257	0.205861	4.5619	0.321034	0.0264028	0.0101265	0.0371655	0.0371655
IGSF10	ENST00000282466.3	1.7851e-06	0.000121093	-0.883705	0.185017	4.66769	0.236717	0.0174541	-0.0144082	0.0338929	0.0338929
APELA	ENST00000507152.6	1.86496e-06	0.000126011	-1.93199	0.405239	7.03214	1.31684	0.00145148	0.244876	0.00916988	0.244876
BX322639.1	ENST00000423987.2	1.87542e-06	0.000126468	-0.615688	0.129172	5.69802	0.125455	0.00909082	0.00557675	0.0159374	0.0159374
B3GAT1	ENST00000392580.5	1.87757e-06	0.000126489	-0.926791	0.194452	5.2289	0.285302	0.0345834	-5.85182e-05	0.0221339	0.0221339
NTRK3	ENST00000394480.6	1.8942e-06	0.000127483	-1.01501	0.213041	4.26711	0.337105	0.0181854	0.0168511	0.0498946	0.0498946
TMEM8B	ENST00000377991.9	1.90101e-06	0.000127816	-6.19474	1.30041	2.406	11.5665	1.9878	-1.92021	0.54881	0.54881
NA	ENST00000433855.1	1.96428e-06	0.000131424	-0.921406	0.193692	4.9688	0.299717	0.0104505	0.0458245	0.0267745	0.0458245
ZNF483	ENST00000309235.5	1.9839e-06	0.000132607	-1.02884	0.216367	6.44348	0.373728	0.00196176	0.06826	0.0113486	0.06826
TPM1	ENST00000288398.10	2.03315e-06	0.000135503	-0.926431	0.195034	5.08601	0.301047	0.0324848	0.0219717	0.0245725	0.0245725
L1CAM	ENST00000361981.7	2.06176e-06	0.000137275	-0.992514	0.20907	6.36748	0.347978	0.00626233	0.0593033	0.0117033	0.0593033
SPTSSB	ENST00000359175.8	2.09116e-06	0.000138828	-2.90747	0.612821	4.73463	2.98668	0.0357527	0.527571	0.0320676	0.527571
LRIF1	ENST00000485275.2	2.23076e-06	0.000147097	-0.886421	0.187352	4.99786	0.242686	0.0264441	-0.0177403	0.0262072	0.0262072
MDFI	ENST00000230321.10	2.25982e-06	0.000148727	-0.628803	0.132976	5.43646	0.120408	0.00761161	-0.00537374	0.0189124	0.0189124
DTNA	ENST00000595022.5	2.27312e-06	0.000149172	-1.1585	0.245056	5.45201	0.412115	0.0713793	-0.0595292	0.018699	0.018699
SLC8A3	ENST00000356921.6	2.33645e-06	0.000153034	-4.29851	0.910334	1.98676	5.92974	0.432814	0.0504054	0.810249	0.810249
HDGF	ENST00000368209.9	2.40011e-06	0.000156904	-1.21941	0.258545	5.58486	0.510779	0.083191	-0.00232905	0.0170774	0.0170774
BEX5	ENST00000333643.4	2.43178e-06	0.000158671	-0.749306	0.158961	4.82171	0.1974	0.00797765	0.0282252	0.0299253	0.0299253
KIRREL2	ENST00000360202.9	2.49342e-06	0.000162229	-0.821118	0.174384	4.76619	0.238763	0.010264	0.0353509	0.0312631	0.0353509
CCDC141	ENST00000446116.5	2.50422e-06	0.000162777	-2.11995	0.450306	3.60307	1.42729	0.178082	-0.0792864	0.126081	0.126081
FUT9	ENST00000302103.6	2.53892e-06	0.000164719	-0.708111	0.150503	5.15549	0.177608	0.00573182	0.0282447	0.0233597	0.0282447
PDGFRA	ENST00000257290.10	2.5556e-06	0.000165487	-1.24867	0.265469	4.0029	0.475063	0.0364556	-0.0273188	0.0692548	0.0692548
APELA	ENST00000515275.1	2.56875e-06	0.000165869	-1.83555	0.390327	3.48812	1.11986	0.0785969	0.0577634	0.149936	0.149936
KLHL7	ENST00000409689.5	2.69621e-06	0.000173608	-0.895431	0.190814	5.52651	0.280026	0.036867	0.012492	0.0177477	0.0177477
TERF1	ENST00000522018.1	2.71166e-06	0.000174275	-1.95051	0.415752	3.94394	1.20211	0.183966	-0.108017	0.0753086	0.0753086
CARD11	ENST00000396946.8	2.80151e-06	0.000179543	-0.631915	0.134885	6.88925	0.141628	0.00104726	0.0262435	0.00958131	0.0262435
MT1G	ENST00000379811.3	2.87924e-06	0.00018418	-2.03262	0.43439	4.15427	1.46589	0.0330996	0.249942	0.0568175	0.249942
SNN	ENST00000329565.6	2.88504e-06	0.000184378	-0.599061	0.128036	7.35723	0.127334	0.00070739	0.0238825	0.00847614	0.0238825
VSIG10L	ENST00000335624.4	2.91719e-06	0.000185567	-1.97325	0.421944	3.72923	1.23885	0.163122	-0.0747066	0.103934	0.103934
SKIL	ENST00000413427.6	2.91422e-06	0.000185567	-0.712962	0.152447	5.98901	0.170364	0.0211378	0.00119941	0.0137225	0.0137225
ACLY	ENST00000353196.5	2.92283e-06	0.000185753	-0.775085	0.165752	7.32717	0.189089	0.0326835	-0.0216059	0.00852711	0.00852711
RIF1	ENST00000428287.6	2.94077e-06	0.00018672	-0.915338	0.195798	7.00483	0.297357	0.0245569	0.0329483	0.00924318	0.0329483
PNMA8C	ENST00000617053.2	2.9545e-06	0.000187418	-0.925124	0.197932	4.43424	0.262248	0.0168555	-0.00999044	0.0419099	0.0419099
FNIP2	ENST00000504704.6	3.0197e-06	0.000191376	-0.676169	0.144806	5.05283	0.154802	0.0062793	0.0157716	0.0251739	0.0251739
MORF4L1	ENST00000560422.5	3.09663e-06	0.000195347	-4.82618	1.0347	1.71994	7.02017	0.593376	-0.552654	1.01254	1.01254
PHC1	ENST00000538657.5	3.15437e-06	0.000198807	-2.85394	0.612367	3.41442	2.62782	0.395414	-0.165002	0.167076	0.167076
POU2F2	ENST00000389341.9	3.18095e-06	0.00019993	-0.696692	0.149544	5.19812	0.17245	0.00903315	0.024512	0.0226419	0.024512
NAP1L2	ENST00000373517.3	3.21987e-06	0.00020182	-0.733714	0.157575	5.89485	0.191297	0.00274496	0.0345	0.0143493	0.0345
LRATD2	ENST00000304916.4	3.31978e-06	0.000207702	-0.610184	0.131223	6.86543	0.132361	0.00784116	0.0179881	0.00965678	0.0179881
COL23A1	ENST00000407622.2	3.48407e-06	0.000216989	-1.167	0.251509	4.55181	0.422598	0.0573794	-0.0398437	0.0375062	0.0375062
STOM	ENST00000347359.3	3.52133e-06	0.00021911	-1.30524	0.281436	4.41864	0.537658	0.0762479	-0.0430485	0.0425613	0.0425613
NAP1L5	ENST00000323061.6	3.75277e-06	0.000231949	-1.95735	0.423246	3.35902	1.31519	0.0878237	0.119448	0.180882	0.180882
ADAMTS8	ENST00000257359.7	3.82294e-06	0.000235099	-1.44262	0.312202	4.834	0.741307	0.0260697	0.120135	0.0296415	0.120135
PLEKHA2	ENST00000617275.5	3.97716e-06	0.000243707	-0.916106	0.198611	5.42646	0.299111	0.00720596	0.0519634	0.0190526	0.0519634
AFP	ENST00000508838.5	4.16221e-06	0.000254363	-3.99506	0.867904	1.7477	5.03112	0.139645	0.164062	0.990241	0.990241
FOXO4	ENST00000374259.7	4.27798e-06	0.000260507	-1.29526	0.281738	6.16976	0.598563	0.00257895	0.116486	0.0126839	0.116486
BAMBI	ENST00000375533.6	4.34181e-06	0.000263691	-0.808451	0.175968	5.58469	0.233235	0.00550751	0.0409395	0.0170793	0.0409395
SHLD2P1	ENST00000497389.7	4.40459e-06	0.000267267	-1.29751	0.282601	4.3717	0.600897	0.0233791	0.0964161	0.0446289	0.0964161
BX322639.1	ENST00000650175.1	4.41943e-06	0.000267929	-0.702605	0.153052	5.64603	0.151579	0.0187006	-0.0143465	0.016437	0.016437
TMEM106C	ENST00000449758.6	4.45169e-06	0.000269646	-1.02065	0.222407	5.91419	0.353998	0.0599826	-0.00812934	0.0142146	0.0142146
METTL7A	ENST00000548553.1	4.54434e-06	0.000274287	-1.47605	0.321945	5.40981	0.777996	0.0250705	0.130402	0.0192912	0.130402
PLEKHA6	ENST00000272203.8	4.66399e-06	0.000281014	-1.20969	0.264162	4.26798	0.465252	0.054826	-0.0220204	0.0498464	0.0498464
KLF7	ENST00000309446.11	4.88779e-06	0.000293207	-0.642673	0.140643	6.74567	0.147645	0.01148	0.0181905	0.0100677	0.0181905
CNIH2	ENST00000311445.7	4.98822e-06	0.000298708	-1.0521	0.230457	4.63891	0.355686	0.0449328	-0.0154185	0.0347327	0.0347327
ITIH5	ENST00000397146.7	5.00291e-06	0.000299326	-1.43668	0.31474	3.80511	0.716123	0.0560226	0.0651098	0.0925692	0.0925692
AP3B2	ENST00000542200.2	5.08103e-06	0.000303447	-0.750391	0.164508	4.78763	0.182778	0.00985914	0.00745611	0.0307354	0.0307354
TRDN	ENST00000361029.8	5.08509e-06	0.000303447	-1.14614	0.251277	5.32269	0.469856	0.00776873	0.0869414	0.020629	0.0869414
TRIML2	ENST00000394461.2	5.20923e-06	0.000310293	-1.37324	0.301402	3.74708	0.581945	0.0351327	-0.0148743	0.101132	0.101132
SEPTIN9	ENST00000423034.6	5.36659e-06	0.000318407	-0.607476	0.133514	6.70952	0.121034	0.0165364	-0.0036294	0.0102024	0.0102024
DGKZ	ENST00000343674.10	5.58826e-06	0.000328886	-4.53813	0.999281	1.57592	6.38603	0.364285	-0.104737	1.13356	1.13356
JAKMIP2	ENST00000333010.6	5.70625e-06	0.000334679	-0.733248	0.161616	5.15284	0.185494	0.0157745	0.0144731	0.0234049	0.0234049
RBPJ	ENST00000348160.8	5.73436e-06	0.000336039	-0.717333	0.158144	5.94919	0.157602	0.0235352	-0.0194947	0.013979	0.013979
PTMA	ENST00000409115.7	5.82503e-06	0.00034077	-0.69929	0.154279	10.2097	0.175264	0.000114074	0.0355888	0.0166909	0.0355888
RIPOR3	ENST00000327979.7	5.84842e-06	0.000341846	-4.00358	0.883443	2.18809	5.74517	0.127104	1.0436	0.675443	1.0436
CEND1	ENST00000330106.5	5.92992e-06	0.000345723	-1.26191	0.278638	4.15211	0.570895	0.0261485	0.09031	0.0569657	0.09031
RAB17	ENST00000392001.6	5.9533e-06	0.000346791	-1.99819	0.441292	4.2898	1.43151	0.209175	0.0829325	0.0486676	0.0829325
JAZF1	ENST00000283928.10	5.99284e-06	0.000348352	-0.673575	0.148802	5.66887	0.162682	0.0160725	0.0171407	0.0162128	0.0171407
CHODL	ENST00000400128.5	6.6867e-06	0.000385576	-1.46441	0.325178	4.64325	0.77024	0.0361482	0.122463	0.0346039	0.122463
CBS	ENST00000462349.5	6.7464e-06	0.000388037	-0.681961	0.151495	5.191	0.166986	0.0116658	0.0226645	0.0227604	0.0227604
TPM1	ENST00000560975.5	6.84505e-06	0.000392721	-2.08334	0.463125	3.67446	1.55948	0.102351	0.219376	0.113038	0.219376
IQSEC2	ENST00000640694.1	6.92189e-06	0.00039663	-3.69865	0.822639	5.24754	4.68329	0.993273	-0.269165	0.02183	0.02183
HHLA1	ENST00000473291.1	6.97777e-06	0.000399331	-0.617894	0.137482	10.373	0.137219	3.39288e-05	0.028318	0.0185081	0.028318
SNPH	ENST00000381873.7	7.42855e-06	0.000423007	-1.37589	0.307049	4.44259	0.627586	0.0998498	-0.0252726	0.0415684	0.0415684
NA	ENST00000639708.2	7.42661e-06	0.000423007	-0.637964	0.142368	8.34428	0.146422	0.000690161	0.029713	0.0081294	0.029713
FHDC1	ENST00000511601.5	7.54552e-06	0.000428242	-0.91518	0.204387	6.79343	0.288348	0.0527635	-0.00641113	0.00989739	0.00989739
DNM3	ENST00000523513.1	7.86723e-06	0.000443924	-4.32403	0.967611	1.51378	5.688	0.215928	-0.117377	1.18848	1.18848
RASGRF2	ENST00000265080.9	8.03827e-06	0.000452829	-0.682674	0.152923	6.41749	0.167876	0.0031292	0.0319491	0.0114692	0.0319491
MICAL1	ENST00000456101.6	8.13176e-06	0.000457719	-0.96577	0.216458	4.73329	0.310241	0.038179	-0.000144091	0.0321025	0.0321025
MSC	ENST00000325509.4	8.25844e-06	0.000464086	-1.13524	0.254631	3.94505	0.439476	0.0220671	0.0439904	0.0751882	0.0751882
TRIM22	ENST00000425490.5	8.35078e-06	0.000468506	-1.57285	0.352974	4.45524	0.891666	0.142775	0.0441115	0.0410597	0.0441115
AKNA	ENST00000374079.8	8.42359e-06	0.000471843	-4.67885	1.05045	1.64628	6.63107	0.581843	-0.502369	1.07334	1.07334
SRSF3	ENST00000373715.11	8.52515e-06	0.000476337	-0.673268	0.151243	7.6261	0.163437	0.00131663	0.0329952	0.00813109	0.0329952
TFPI2	ENST00000650573.1	8.69613e-06	0.000483915	-0.976108	0.219484	4.63012	0.295137	0.0372635	-0.0256377	0.0349963	0.0349963
PCSK9	ENST00000302118.5	9.02311e-06	0.000500483	-0.796477	0.179413	8.15743	0.228939	0.000323422	0.0479601	0.0080023	0.0479601
SLC35E4	ENST00000343605.5	9.13144e-06	0.000505263	-0.920816	0.207541	4.35029	0.276681	0.0189813	0.00890607	0.0456289	0.0456289
EDN1	ENST00000379375.6	9.48122e-06	0.000521246	-2.91113	0.657336	2.62193	2.6283	0.208641	-0.101272	0.439495	0.439495
HSPA2	ENST00000394709.2	9.53417e-06	0.000523737	-0.961118	0.21708	4.45969	0.314635	0.0298022	0.0170869	0.0408835	0.0408835
RAB17	ENST00000477149.5	9.61201e-06	0.000525902	-2.17139	0.49063	3.28247	1.51709	0.159896	-0.0316435	0.201181	0.201181
HS3ST2	ENST00000261374.4	1.00928e-05	0.000549655	-3.92214	0.888331	1.74531	4.96962	0.191554	0.251792	0.992143	0.992143
CALB1	ENST00000514406.2	1.02045e-05	0.000555211	-0.630815	0.142951	8.6135	0.1439	0.000191656	0.0304609	0.00848007	0.0304609
G3BP2	ENST00000511868.5	1.05392e-05	0.000571151	-1.13598	0.257837	4.20577	0.41605	0.0462429	-0.0100988	0.053477	0.053477
METTL7A	ENST00000332160.5	1.05651e-05	0.000571649	-0.85685	0.194505	5.3796	0.265656	0.0243743	0.0323743	0.019741	0.0323743
AC256203.2	ENST00000642568.1	1.06545e-05	0.000574672	-0.779512	0.177023	5.32171	0.219896	0.0212837	0.0257221	0.0206445	0.0257221
AC256203.2	ENST00000644121.1	1.06545e-05	0.000574672	-0.779512	0.177023	5.32171	0.219896	0.0212837	0.0257221	0.0206445	0.0257221
HLA-DOA	ENST00000452598.2	1.07197e-05	0.000576743	-0.718846	0.163295	5.29648	0.18702	0.00278997	0.0372081	0.0210439	0.0372081
HLA-DOA	ENST00000426070.2	1.07197e-05	0.000576743	-0.718846	0.163295	5.29648	0.18702	0.00278997	0.0372081	0.0210439	0.0372081
CA4	ENST00000300900.9	1.0747e-05	0.000577387	-1.55813	0.353994	3.75115	0.878705	0.0478413	0.140127	0.100504	0.140127
STPG4	ENST00000496939.1	1.07586e-05	0.000577557	-0.810526	0.184155	4.88699	0.237781	0.00780023	0.0430691	0.0284637	0.0430691
BAG6	ENST00000442870.5	1.11108e-05	0.000594595	-4.93429	1.12287	1.7876	7.30659	0.932508	-0.929454	0.958753	0.958753
TYRO3	ENST00000559066.5	1.12041e-05	0.000598653	-0.595208	0.135505	6.79078	0.128316	0.00199793	0.0255444	0.00990663	0.0255444
SNX5	ENST00000483485.5	1.16836e-05	0.000619439	-0.612842	0.139809	5.51358	0.119049	0.0114152	-0.00344449	0.0179047	0.0179047
PLP1	ENST00000619236.1	1.24297e-05	0.000656454	-1.1367	0.260119	6.78953	0.468819	0.00418425	0.0973088	0.00991098	0.0973088
GPATCH2	ENST00000366934.3	1.28994e-05	0.000678118	-0.606571	0.139064	5.35257	0.133585	0.00781961	0.0211887	0.0201602	0.0211887
TMEM200A	ENST00000617887.4	1.31057e-05	0.000687908	-0.691069	0.158563	5.64268	0.155383	0.0212427	-0.00610466	0.0164706	0.0164706
PDZD4	ENST00000484792.5	1.31158e-05	0.00068791	-0.9923	0.227688	5.24779	0.357608	0.0159239	0.0618386	0.0218259	0.0618386
WNK1	ENST00000535572.5	1.36181e-05	0.000709365	-0.750215	0.172466	7.04172	0.20454	0.025795	0.0188218	0.00914474	0.0188218
GRIN2B	ENST00000609686.3	1.37054e-05	0.000713369	-0.645182	0.148368	5.02549	0.133114	0.00733794	0.00295666	0.0256816	0.0256816
PHF21B	ENST00000462631.1	1.38352e-05	0.000719033	-0.895225	0.205966	4.34431	0.256632	0.017718	0.00253638	0.0459152	0.0459152
LRP10	ENST00000359591.9	1.42496e-05	0.000738327	-0.610588	0.140689	6.43838	0.135597	0.00215138	0.0275388	0.0113722	0.0275388
SPATS2L	ENST00000460095.1	1.48263e-05	0.000763581	-1.18202	0.272904	4.48941	0.456827	0.0719766	-0.0248781	0.0397381	0.0397381
CBX7	ENST00000216133.10	1.49165e-05	0.000765923	-0.599169	0.138379	5.17103	0.117424	0.00562706	0.00652729	0.023096	0.023096
SPEG	ENST00000498378.5	1.55945e-05	0.000795163	-1.10002	0.254628	4.60071	0.37416	0.0613489	-0.0474169	0.0359039	0.0359039
ADCY2	ENST00000489501.1	1.56949e-05	0.000798692	-0.995315	0.230466	4.17175	0.329726	0.0240265	0.0166371	0.0556455	0.0556455
GABRP	ENST00000519196.5	1.69404e-05	0.000856989	-0.611106	0.142058	8.91446	0.136252	0.000164716	0.0301059	0.00913087	0.0301059
PGM2L1	ENST00000298198.5	1.69944e-05	0.000859085	-0.770523	0.179145	7.66789	0.216623	0.000479012	0.0476605	0.00809478	0.0476605
MAP1A	ENST00000300231.6	1.82857e-05	0.000919604	-0.806519	0.188225	5.02683	0.231186	0.0274868	0.0175681	0.0256564	0.0256564
ZSWIM3	ENST00000255152.3	1.83233e-05	0.000920818	-0.828117	0.193287	4.46521	0.239245	0.0153729	0.0265172	0.0406666	0.0406666
JAK3	ENST00000458235.5	1.97925e-05	0.000987401	-0.593769	0.139147	5.18689	0.121442	0.00621341	0.0133788	0.0228292	0.0228292
JAKMIP2	ENST00000265272.9	1.99459e-05	0.000994334	-0.633507	0.148519	5.27222	0.144316	0.0116552	0.0182404	0.0214316	0.0214316
HECA	ENST00000367658.3	2.05329e-05	0.0010184	-0.586359	0.137675	5.49514	0.12589	0.00458447	0.023847	0.0181344	0.023847
SLC39A10	ENST00000458054.1	2.09725e-05	0.00103618	-4.01254	0.943178	3.13713	5.89764	0.10842	1.22596	0.243102	1.22596
SEMA3A	ENST00000436949.5	2.10892e-05	0.00103996	-0.771044	0.181293	6.6094	0.217793	0.00216756	0.047133	0.0106029	0.047133
SLC7A3	ENST00000298085.4	2.40194e-05	0.00116897	-1.00799	0.238644	7.17286	0.373154	0.0162581	0.0691682	0.00883014	0.0691682
CDON	ENST00000392693.7	2.42361e-05	0.00117724	-1.2028	0.284903	4.59364	0.531423	0.0811241	0.0406301	0.0361283	0.0406301
ANKRD29	ENST00000585908.2	2.43383e-05	0.00118062	-1.46899	0.348033	3.55468	0.711844	0.0459977	0.0345779	0.135693	0.135693
SPIB	ENST00000270632.7	2.48224e-05	0.0012007	-2.37021	0.562139	3.77855	1.76225	0.377614	-0.281507	0.0963857	0.0963857
NRBP2	ENST00000442628.7	2.48793e-05	0.00120176	-0.701622	0.166423	5.50947	0.173019	0.0235897	0.00808167	0.0179553	0.0179553
ITM2C	ENST00000335005.10	2.51301e-05	0.00121302	-1.10736	0.262805	5.80763	0.407773	0.0885997	-0.0387291	0.0150003	0.0150003
MYADM	ENST00000421337.6	2.53136e-05	0.00121998	-0.905345	0.214945	5.11309	0.259273	0.0452092	-0.0284866	0.0240928	0.0240928
UGP2	ENST00000640075.1	2.57897e-05	0.00123961	-0.786438	0.186901	7.057	0.227464	0.00221068	0.0501874	0.00910527	0.0501874
KDELR3	ENST00000216014.9	2.58391e-05	0.00124111	-0.842112	0.200153	4.57147	0.257786	0.0232443	0.0330568	0.0368474	0.0368474
PGAM1	ENST00000467867.1	2.66134e-05	0.00127472	-0.971127	0.231184	4.40212	0.304554	0.0368992	-0.00986397	0.0432699	0.0432699
FAM126A	ENST00000432176.6	2.86387e-05	0.00135654	-0.912125	0.218002	4.47495	0.29627	0.0309988	0.0273488	0.0402883	0.0402883
CACNA2D2	ENST00000266039.7	2.92527e-05	0.0013818	-5.47279	1.30953	2.04777	9.38109	1.80464	-1.31008	0.767657	0.767657
VASH2	ENST00000366964.7	2.93448e-05	0.0013852	-1.17323	0.280779	3.83466	0.416753	0.0297327	-0.0249706	0.0885229	0.0885229
MYCN	ENST00000638417.1	3.13635e-05	0.00147641	-1.80808	0.434286	5.28904	1.12712	0.261744	-0.0787756	0.0211624	0.0211624
ATP1A3	ENST00000648268.1	3.1513e-05	0.00147943	-0.623002	0.149679	6.92423	0.133861	0.0241317	-0.00235502	0.0094741	0.0094741
PDE2A	ENST00000376450.7	3.15589e-05	0.00147951	-1.10195	0.264771	4.74265	0.403912	0.0732953	-0.0237682	0.0318599	0.0318599
FLT1	ENST00000541932.5	3.15494e-05	0.00147951	-0.876139	0.21051	5.17763	0.267757	0.0434871	0.00335108	0.0229846	0.0229846
TIMP4	ENST00000287814.5	3.16879e-05	0.00148251	-0.698533	0.167877	5.04441	0.180203	0.00771565	0.0345583	0.025329	0.0345583
SYT4	ENST00000255224.8	3.31416e-05	0.00154296	-0.99874	0.240618	5.10902	0.368721	0.0123034	0.074542	0.0241643	0.074542
MAGEE1	ENST00000361470.3	3.31335e-05	0.00154296	-1.03313	0.2489	5.49052	0.39455	0.00403502	0.088892	0.0181931	0.088892
AFAP1	ENST00000358461.6	3.38374e-05	0.00156926	-1.0841	0.261483	6.59536	0.386448	0.091898	-0.049568	0.0106624	0.0106624
RGS3	ENST00000620489.1	3.43415e-05	0.00158713	-0.928497	0.224135	4.3337	0.300387	0.0289241	0.0232693	0.0464305	0.0464305
NDUFB10	ENST00000543683.6	3.48695e-05	0.00160719	-0.702928	0.169827	5.13784	0.162838	0.0195994	-0.00134206	0.0236624	0.0236624
TMSB4X	ENST00000451311.7	3.51887e-05	0.00162024	-0.651082	0.157381	9.24026	0.156895	0.000143117	0.0370098	0.0101976	0.0370098
HMOX1	ENST00000216117.9	3.62969e-05	0.00166068	-0.688279	0.166659	5.60549	0.175449	0.00370194	0.0379608	0.0168546	0.0379608
APCDD1L	ENST00000371149.7	3.75328e-05	0.00171151	-1.25455	0.304343	3.69088	0.540069	0.02871	0.0561627	0.110227	0.110227
UBALD2	ENST00000327490.8	3.77009e-05	0.00171803	-0.790678	0.191859	4.63012	0.231724	0.0135793	0.0416357	0.0349962	0.0416357
PREPL	ENST00000409957.5	3.84114e-05	0.00174385	-5.57777	1.35487	2.0983	9.49005	2.02	-1.82426	0.733506	0.733506
DLGAP3	ENST00000373347.6	3.83538e-05	0.00174385	-4.51217	1.09594	2.64797	7.54921	1.08058	0.72104	0.427354	0.72104
NA	ENST00000639516.1	3.91056e-05	0.0017658	-0.585173	0.142284	8.60613	0.127022	0.000193689	0.0301735	0.00846769	0.0301735
SIM1	ENST00000369208.7	3.95519e-05	0.00178221	-3.77624	0.918775	1.53912	4.43379	0.100336	0.0944009	1.16589	1.16589
C19orf85	ENST00000635964.1	3.95828e-05	0.00178243	-2.50011	0.608314	2.6821	2.16355	0.143274	0.21721	0.411795	0.411795
CA8	ENST00000524872.5	4.07359e-05	0.00182834	-1.04599	0.254917	4.69491	0.406209	0.0223691	0.0751049	0.0331301	0.0751049
TRIM58	ENST00000366481.4	4.12519e-05	0.00185028	-0.701384	0.171055	4.66372	0.153618	0.00988268	-0.00233716	0.0340068	0.0340068
RRAS2	ENST00000531807.5	4.13109e-05	0.00185078	-0.863208	0.210537	4.66069	0.276729	0.0232966	0.0431924	0.0340938	0.0431924
THY1	ENST00000524659.1	4.13171e-05	0.00185078	-2.21068	0.539191	4.71859	1.57107	0.403601	-0.272429	0.0324897	0.0324897
NTN4	ENST00000343702.9	4.14792e-05	0.00185683	-3.67063	0.895476	2.00471	4.9656	0.405254	0.749178	0.797561	0.797561
EIF2AK4	ENST00000624709.1	4.21871e-05	0.00188605	-0.693865	0.169435	4.67923	0.153992	0.00949652	0.00245003	0.0335659	0.0335659
TSHZ3	ENST00000240587.4	4.32816e-05	0.00192974	-0.644098	0.157511	5.47702	0.154231	0.00468094	0.0325337	0.0183669	0.0325337
NECAB1	ENST00000417640.7	4.33055e-05	0.00192974	-0.865368	0.211628	5.63706	0.278402	0.00502136	0.0621583	0.0165273	0.0621583
TUBA1A	ENST00000301071.12	4.39988e-05	0.00195555	-0.807508	0.197656	8.29349	0.242502	0.00127872	0.0573234	0.00808571	0.0573234
ADAMTS4	ENST00000367996.6	4.42081e-05	0.00196357	-0.646389	0.158261	5.38574	0.155402	0.00558001	0.03199	0.0196477	0.03199
CDK4	ENST00000550419.5	4.4777e-05	0.00198498	-4.09778	1.00403	1.35574	5.08105	0.176785	-0.122387	1.33532	1.33532
HELLS	ENST00000371327.2	4.52328e-05	0.0020013	-0.623167	0.152775	7.75047	0.144509	0.000509171	0.0345012	0.00803632	0.0345012
PLPP1	ENST00000307259.9	4.54754e-05	0.00201073	-0.926031	0.227094	5.46221	0.319146	0.0147824	0.0625752	0.018562	0.0625752
SEPHS1	ENST00000425947.1	4.73885e-05	0.00208589	-0.814866	0.200304	4.74542	0.241366	0.0283937	0.024311	0.0317887	0.0317887
USP44	ENST00000393091.6	4.84923e-05	0.00213036	-0.844436	0.207847	6.41296	0.265762	0.0311667	0.0336338	0.0114902	0.0336338
NECTIN3	ENST00000319792.7	4.862e-05	0.0021346	-0.971043	0.239046	4.72885	0.340461	0.0534955	0.0184838	0.0322187	0.0322187
CACNA1A	ENST00000360228.10	4.98812e-05	0.00218158	-5.32277	1.31226	1.96824	8.50229	1.75958	-1.75618	0.823461	0.823461
EMILIN1	ENST00000380320.8	5.18178e-05	0.00225618	-0.959118	0.236979	4.1778	0.339357	0.0289887	0.0502427	0.0552497	0.0552497
NECTIN2	ENST00000592018.1	5.24117e-05	0.00227914	-0.780978	0.193091	5.18436	0.211074	0.0330549	0.00206451	0.0228716	0.0228716
FCHO2	ENST00000512348.5	5.33088e-05	0.00230951	-0.840417	0.207992	4.97183	0.263803	0.0280328	0.0368582	0.0267147	0.0368582
DMTF1	ENST00000412139.6	5.4455e-05	0.00235008	-4.58327	1.1357	1.59849	6.47345	0.820713	-0.6063	1.11401	1.11401
FEZ1	ENST00000366139.3	5.54048e-05	0.00238656	-2.74675	0.68131	3.46256	2.82041	0.204334	0.491942	0.155719	0.491942
CTDSPL	ENST00000273179.10	5.54816e-05	0.00238836	-0.828759	0.205584	6.26106	0.228232	0.0511799	-0.0234558	0.0122171	0.0122171
SYTL2	ENST00000389959.8	5.61514e-05	0.00240962	-4.31607	1.0714	1.46489	5.64715	0.489036	-0.415762	1.23282	1.23282
SPP1	ENST00000395080.8	5.66241e-05	0.00242838	-1.71367	0.425602	6.72802	1.09836	0.0042475	0.267458	0.0101328	0.267458
PLXNC1	ENST00000258526.9	5.80231e-05	0.00247751	-1.19952	0.298335	4.02735	0.538457	0.0344577	0.0990477	0.0669528	0.0990477
LYPD3	ENST00000244333.4	5.90385e-05	0.00251616	-0.926971	0.230784	4.21689	0.321696	0.0193982	0.0604935	0.0527975	0.0604935
BLCAP	ENST00000613961.1	5.91493e-05	0.0025181	-0.984364	0.2451	4.00605	0.347367	0.0211585	0.0496857	0.0689522	0.0689522
TRIM2	ENST00000338700.10	6.04201e-05	0.00256864	-0.624286	0.155637	6.93611	0.145987	0.00240975	0.0339246	0.00943868	0.0339246
CAPN6	ENST00000324068.2	6.11403e-05	0.00259443	-0.828164	0.206609	5.26742	0.256982	0.00516497	0.0588659	0.0215087	0.0588659
CXCL1	ENST00000395761.3	6.20394e-05	0.00262282	-3.6936	0.922267	1.49742	4.26307	0.0726618	0.140165	1.2032	1.2032
VDR	ENST00000549336.5	6.31378e-05	0.00266268	-1.60746	0.401787	3.41801	0.800064	0.0759396	-0.0448291	0.16621	0.16621
CDH13	ENST00000567109.6	6.50887e-05	0.00273821	-0.935524	0.234258	4.66016	0.328414	0.0183264	0.063989	0.0341093	0.063989
SPINK9	ENST00000511717.6	6.55361e-05	0.00275364	-0.677919	0.169822	5.22516	0.17248	0.0065118	0.0367476	0.0221952	0.0367476
FERMT2	ENST00000343279.8	6.60828e-05	0.00277151	-0.597953	0.149864	6.86	0.124151	0.0240146	-0.00290677	0.00967428	0.00967428
VCL	ENST00000372755.7	6.66113e-05	0.00279196	-1.05714	0.265075	6.68579	0.41958	0.0104311	0.0949657	0.0102937	0.0949657
SYT11	ENST00000368324.5	6.6878e-05	0.00279718	-0.99577	0.249746	6.43584	0.372315	0.00175297	0.0918067	0.011384	0.0918067
POLR3G	ENST00000503373.5	6.79636e-05	0.00283131	-0.602957	0.151371	6.16644	0.136563	0.00415376	0.0302161	0.0127015	0.0302161
AASS	ENST00000460376.5	6.89131e-05	0.00286389	-1.85429	0.465901	3.47989	1.05406	0.173815	-0.145637	0.15178	0.15178
AC124312.1	ENST00000551312.6	6.96374e-05	0.00289193	-0.645416	0.162266	6.54753	0.156565	0.00247979	0.0370155	0.0108713	0.0370155
MME	ENST00000360490.6	7.0083e-05	0.00290545	-1.02554	0.257933	5.70115	0.373361	0.0838853	-0.0115855	0.0159086	0.0159086
CALD1	ENST00000422748.5	7.04495e-05	0.00291888	-2.0227	0.508886	5.77063	1.53815	0.06889	0.319557	0.0153006	0.319557
OSBPL10	ENST00000429492.6	7.16612e-05	0.00296549	-2.3566	0.593498	3.63023	2.05506	0.407399	0.0788349	0.120961	0.120961
NLRP10	ENST00000328600.3	7.2302e-05	0.00298839	-1.25488	0.316203	3.58185	0.511782	0.0197571	0.0294523	0.130219	0.130219
NLRP10	ENST00000625327.2	7.2302e-05	0.00298839	-1.25488	0.316203	3.58185	0.511782	0.0197571	0.0294523	0.130219	0.130219
PIF1	ENST00000560504.1	7.25835e-05	0.00299822	-1.73634	0.437623	3.28167	0.924749	0.0858722	-0.0605114	0.201399	0.201399
PDPN	ENST00000510906.5	7.30704e-05	0.00300925	-0.909182	0.229241	4.76699	0.253953	0.0475837	-0.0401217	0.0312432	0.0312432
FDFT1	ENST00000647069.1	7.43484e-05	0.00305818	-0.800229	0.20198	7.40051	0.241065	0.000555879	0.060638	0.00840725	0.060638
FDFT1	ENST00000647178.1	7.43484e-05	0.00305818	-0.800229	0.20198	7.40051	0.241065	0.000555879	0.060638	0.00840725	0.060638
CALB1	ENST00000518457.5	7.52921e-05	0.00308774	-1.50214	0.379434	4.6617	0.708697	0.18189	-0.142182	0.0340648	0.0340648
PGBD5	ENST00000391860.7	7.75836e-05	0.00316465	-0.709119	0.179445	5.87298	0.189495	0.0034075	0.044893	0.0145057	0.044893
LMCD1	ENST00000157600.8	7.89538e-05	0.00321479	-1.2995	0.329191	3.64649	0.589771	0.04456	0.0593934	0.11799	0.11799
GNG3	ENST00000294117.6	8.21301e-05	0.00333223	-1.38413	0.351471	3.55185	0.675414	0.0490231	0.0768143	0.136275	0.136275
NECTIN3	ENST00000493615.5	8.22722e-05	0.00333602	-0.768398	0.19514	4.65021	0.222826	0.0189705	0.0381487	0.0343989	0.0381487
CHST1	ENST00000308064.7	8.37808e-05	0.00339029	-1.65319	0.420303	3.25344	0.958879	0.0557563	0.117959	0.209225	0.209225
VASH2	ENST00000271776.4	8.38874e-05	0.00339147	-0.880167	0.223789	4.21262	0.292506	0.0190715	0.0560511	0.0530565	0.0560511
BHMT	ENST00000274353.10	8.43188e-05	0.00340489	-2.16182	0.549833	3.15384	1.61025	0.215381	0.0448734	0.238093	0.238093
EPHB2	ENST00000400191.7	8.43718e-05	0.00340502	-0.694245	0.176579	4.74129	0.153613	0.0148754	-0.00359998	0.0318951	0.0318951
PDZD4	ENST00000164640.8	8.52446e-05	0.00343013	-0.991522	0.25235	6.18658	0.363635	0.0829251	0.00294998	0.0125956	0.0125956
RECK	ENST00000377966.4	8.60945e-05	0.00345418	-0.597686	0.152208	4.98504	0.114503	0.00829532	0.000872851	0.0264556	0.0264556
CD24	ENST00000606017.2	8.74048e-05	0.00349854	-0.901537	0.2298	10.2134	0.3072	5.3984e-05	0.0791582	0.0167298	0.0791582
MACF1	ENST00000530275.3	8.80028e-05	0.0035163	-0.81216	0.207105	7.01496	0.249352	0.00117348	0.0631651	0.00921571	0.0631651
S100A13	ENST00000339556.8	8.91598e-05	0.00355424	-1.09036	0.27827	4.74907	0.443489	0.0844563	0.0240736	0.0316954	0.0316954
OXTR	ENST00000316793.7	8.93376e-05	0.00355512	-1.48828	0.37987	4.88155	0.837655	0.0106758	0.205776	0.0285814	0.205776
NXPE3	ENST00000477909.5	8.93326e-05	0.00355512	-0.624466	0.159389	5.79211	0.147473	0.0119647	0.0261425	0.0151244	0.0261425
INHBA	ENST00000242208.5	9.04387e-05	0.00358642	-2.37724	0.607227	2.78481	1.75269	0.18565	-0.114002	0.367436	0.367436
NADSYN1	ENST00000624637.1	9.35392e-05	0.00369439	-0.797307	0.204084	5.6625	0.24069	0.0060118	0.0564634	0.0162745	0.0564634
TTN	ENST00000360870.9	9.36089e-05	0.00369502	-2.28351	0.584527	2.7808	1.78419	0.143412	0.131423	0.369096	0.369096
GAL3ST3	ENST00000312006.5	9.414e-05	0.0037117	-0.637494	0.163241	5.11093	0.153897	0.0116048	0.0283669	0.0241308	0.0283669
SH2D5	ENST00000460804.5	0.000100419	0.00393659	-0.758299	0.194957	5.08956	0.218007	0.032503	0.0243741	0.0245091	0.0245091
TRIM5	ENST00000380034.7	0.00010312	0.00401718	-0.733112	0.188794	5.7672	0.204008	0.0171053	0.0363595	0.0153291	0.0363595
HAPLN4	ENST00000291481.8	0.000103536	0.00403107	-1.00369	0.25854	5.2739	0.382431	0.00637609	0.0938883	0.0214047	0.0938883
TAGLN2	ENST00000368096.5	0.000103752	0.0040349	-4.80222	1.23716	1.70796	6.93856	1.27358	-1.24836	1.02227	1.02227
SNAPC2	ENST00000597584.5	0.00010425	0.00404507	-5.27101	1.35834	1.94296	8.42103	1.92593	-1.81848	0.841704	0.841704
RIPOR2	ENST00000644621.1	0.000104632	0.00405759	-4.67161	1.20415	1.78138	6.80011	1.21135	-0.8952	0.963616	0.963616
SON	ENST00000455528.5	0.000108736	0.00420247	-5.49037	1.41862	2.14179	9.35146	2.31376	-1.9285	0.704963	0.704963
ZNF738	ENST00000597492.1	0.000109419	0.00422408	-0.740096	0.191304	4.61017	0.171972	0.019288	-0.00972573	0.0356077	0.0356077
CAVIN3	ENST00000303927.4	0.000109878	0.00423942	-1.08022	0.279294	3.87628	0.440544	0.033835	0.079267	0.083173	0.083173
COL26A1	ENST00000613501.1	0.000115873	0.00444814	-0.681608	0.176825	6.27566	0.168029	0.0347558	0.00105909	0.012145	0.012145
AHNAK2	ENST00000333244.6	0.000117812	0.00449987	-1.10802	0.28775	4.04928	0.450712	0.0592126	0.0437884	0.0649871	0.0649871
PPP2R2B	ENST00000512639.5	0.000117715	0.00449987	-4.28544	1.11286	1.69693	5.61411	0.8264	-0.695652	1.03129	1.03129
AC007326.4	ENST00000638240.1	0.000118589	0.004527	-0.705496	0.183292	7.92758	0.189633	0.000419997	0.0499741	0.00796976	0.0499741
FGF2	ENST00000608478.1	0.000118695	0.00452852	-0.799138	0.207633	6.52601	0.24332	0.0085643	0.0561026	0.0109686	0.0561026
ISY1-RAB43	ENST00000418265.1	0.000118867	0.00453256	-0.627968	0.163174	6.24673	0.127492	0.0276503	-0.0161646	0.0122885	0.0122885
TCOF1	ENST00000427724.7	0.00011959	0.00455506	-5.14579	1.33762	1.87978	8.19713	1.79554	-1.47882	0.888313	0.888313
ACTC1	ENST00000650163.1	0.000120301	0.00457704	-1.08032	0.28093	6.53347	0.444833	0.00206336	0.116319	0.0109346	0.116319
NAV3	ENST00000552895.5	0.00012122	0.00460945	-4.59505	1.19549	1.60438	6.36335	1.03486	-0.9986	1.10895	1.10895
KIRREL1	ENST00000368172.1	0.000123447	0.00468375	-0.89887	0.234131	6.04304	0.308171	0.0419407	0.0402852	0.0133922	0.0402852
COL11A1	ENST00000635193.1	0.000124216	0.00471028	-1.29954	0.33863	5.16663	0.551672	0.148835	-0.0925513	0.0231704	0.0231704
HLA-DPB2	ENST00000435074.5	0.000124709	0.00471853	-0.841263	0.219268	4.13518	0.255627	0.0139614	0.0401764	0.0581565	0.0581565
HLA-DPB2	ENST00000424653.5	0.000124709	0.00471853	-0.841263	0.219268	4.13518	0.255627	0.0139614	0.0401764	0.0581565	0.0581565
LRRC55	ENST00000652194.1	0.000125562	0.00474557	-2.39386	0.624214	2.53886	1.85843	0.1047	0.0693727	0.479765	0.479765
RAPGEF5	ENST00000344041.10	0.000125797	0.00475004	-0.862154	0.224839	5.02766	0.23682	0.0501877	-0.0329032	0.0256409	0.0256409
GPD2	ENST00000438166.7	0.000125929	0.00475157	-0.640469	0.167037	6.60172	0.156542	0.015667	0.0261852	0.0106353	0.0261852
MT1G	ENST00000444837.6	0.000126252	0.00476112	-3.14218	0.81963	2.35988	3.70809	0.433674	0.498953	0.574015	0.574015
SLC41A1	ENST00000468057.5	0.000128352	0.00482967	-0.695123	0.181513	5.85623	0.150636	0.0347922	-0.0276957	0.0146284	0.0146284
SCNN1B	ENST00000343070.7	0.000130585	0.00490292	-3.50978	0.917506	1.62324	4.07904	0.169902	0.309428	1.09282	1.09282
AL034430.1	ENST00000609375.1	0.000133861	0.00499034	-3.9401	1.03165	2.29615	5.93448	0.963164	0.633273	0.610138	0.633273
FCHSD1	ENST00000520747.1	0.000136766	0.00508204	-1.11396	0.292075	3.9815	0.381538	0.0565925	-0.0450074	0.071369	0.071369
G3BP1	ENST00000520177.5	0.000138566	0.00514052	-0.728932	0.191285	7.38408	0.20331	0.0046383	0.0502465	0.00843278	0.0502465
DCUN1D5	ENST00000527260.5	0.000140733	0.00520401	-0.67376	0.176985	5.12246	0.143777	0.0230565	-0.0135674	0.023929	0.023929
PNPLA6	ENST00000221249.10	0.000141089	0.00521434	-5.24006	1.3767	1.92688	8.40236	1.98951	-1.78339	0.853431	0.853431
IDO1	ENST00000519154.5	0.000147911	0.0054342	-2.33576	0.615557	3.69608	2.09143	0.319865	0.248501	0.109353	0.248501
SORBS2	ENST00000449407.6	0.000148223	0.00543455	-4.38298	1.15523	1.49834	5.87052	0.799472	-0.665272	1.20237	1.20237
FAM131B	ENST00000443739.6	0.000148706	0.00544294	-1.38785	0.365877	5.87988	0.582431	0.186343	-0.180606	0.0144558	0.0144558
KLHDC8A	ENST00000367155.7	0.000149986	0.00547961	-2.70976	0.714772	3.47218	2.39394	0.612825	-0.373956	0.153522	0.153522
DUS1L	ENST00000354321.11	0.000149952	0.00547961	-4.31632	1.13852	1.46501	5.86859	0.711653	-0.362383	1.2327	1.2327
SLC17A9	ENST00000488738.5	0.000149817	0.00547961	-1.64757	0.434557	3.8902	0.927254	0.201787	-0.0606497	0.0814722	0.0814722
FADS2	ENST00000521849.5	0.00015139	0.00551785	-0.934535	0.246659	4.70963	0.307487	0.0585313	-0.00168095	0.0327296	0.0327296
MED12L	ENST00000273432.8	0.000152735	0.00555182	-0.775036	0.20468	5.17466	0.190542	0.0398059	-0.0268831	0.0230346	0.0230346
PHYHIP	ENST00000454243.7	0.000155924	0.00565574	-1.77122	0.468398	4.33092	0.969264	0.282529	-0.247405	0.0465666	0.0465666
TMEM178A	ENST00000618232.1	0.000156538	0.00567498	-3.68563	0.974915	1.68327	4.44863	0.383169	0.0836717	1.04252	1.04252
SIX2	ENST00000303077.7	0.000159206	0.00575648	-2.73067	0.723116	2.35474	2.37964	0.207479	-0.0291298	0.576865	0.576865
ST8SIA6	ENST00000377602.5	0.000159945	0.005771	-0.803607	0.212871	4.32437	0.226509	0.0210793	0.0198875	0.0468914	0.0468914
DCLK3	ENST00000636136.1	0.000160409	0.00578164	-4.74923	1.25828	1.68147	6.76856	1.33091	-1.3284	1.04401	1.04401
KCNJ2	ENST00000243457.3	0.000164768	0.00591075	-0.64194	0.170381	4.72331	0.144505	0.0111798	0.0149182	0.0323645	0.0323645
HBP1	ENST00000468410.5	0.00016803	0.00600887	-0.768044	0.204116	5.17842	0.206177	0.0395234	-0.00301108	0.0229713	0.0229713
HBP1	ENST00000640195.1	0.00016803	0.00600887	-0.768044	0.204116	5.17842	0.206177	0.0395234	-0.00301108	0.0229713	0.0229713
PAFAH1B3	ENST00000538771.5	0.000169532	0.00605624	-0.642097	0.170745	5.18666	0.125484	0.0208977	-0.0186512	0.0228331	0.0228331
PIP4P2	ENST00000518359.5	0.000172622	0.00615378	-1.18137	0.314525	4.11615	0.439723	0.0888354	-0.062545	0.059554	0.059554
SMAD6	ENST00000612349.1	0.000173264	0.00617026	-1.00368	0.267285	3.85849	0.365351	0.0217516	0.0571682	0.0854103	0.0854103
PRKCB	ENST00000643927.1	0.000175822	0.00625483	-4.47629	1.19322	1.94358	7.70707	1.29441	0.82549	0.84125	0.84125
ACSS2	ENST00000360596.7	0.000176211	0.00626217	-0.76491	0.203928	5.80346	0.22543	0.012118	0.0502619	0.0150334	0.0502619
ZSCAN10	ENST00000571903.5	0.000177389	0.00629751	-0.860647	0.229554	5.26598	0.285448	0.0153949	0.0636476	0.0215319	0.0636476
GALR1	ENST00000299727.4	0.000178136	0.00631746	-1.70811	0.455719	3.42109	1.1245	0.0647557	0.246763	0.165467	0.246763
SORBS2	ENST00000490779.5	0.000179993	0.00636681	-3.32018	0.886431	2.37396	4.24999	0.217194	0.961445	0.566254	0.961445
TP53I11	ENST00000395648.7	0.000182432	0.00643316	-0.626063	0.167299	6.22677	0.124863	0.0295944	-0.0204987	0.012389	0.012389
POU3F1	ENST00000373012.4	0.000182667	0.00643766	-1.25097	0.334317	4.49471	0.603596	0.0142707	0.153381	0.0395397	0.153381
SPATS2L	ENST00000409140.8	0.00018878	0.00660596	-0.85087	0.227897	4.26811	0.242212	0.0280659	0.00320675	0.0498395	0.0498395
CORO2B	ENST00000540068.5	0.000188966	0.0066091	-0.89933	0.240892	4.2071	0.280938	0.0336486	0.0142254	0.053395	0.053395
JADE1	ENST00000413543.6	0.00019056	0.00665124	-1.15951	0.310759	5.81455	0.519222	0.0315863	0.11327	0.0149459	0.11327
PROKR2	ENST00000217270.3	0.000191575	0.00667132	-2.33406	0.625774	2.66446	2.01213	0.167601	0.304626	0.419787	0.419787
CR1L	ENST00000531844.5	0.000195125	0.0067623	-0.852927	0.228959	4.2513	0.281152	0.0224731	0.05616	0.0507799	0.05616
PCDHB12	ENST00000239450.4	0.000197199	0.0068169	-1.08771	0.292194	3.89306	0.416035	0.0469381	0.0294348	0.0811278	0.0811278
DOK4	ENST00000340099.9	0.000199134	0.00687337	-0.592406	0.159244	5.57174	0.107071	0.0208152	-0.0185806	0.0172229	0.0172229
LPAR4	ENST00000435339.3	0.000207247	0.00711396	-0.922306	0.248599	4.69098	0.329356	0.0218082	0.070894	0.0332384	0.070894
CYP2B6	ENST00000324071.10	0.000207752	0.00712772	-3.30749	0.891651	1.72401	4.1192	0.183306	0.863389	1.00926	1.00926
IQSEC2	ENST00000640442.1	0.000208543	0.00714769	-3.51358	0.947456	1.45448	3.9021	0.104126	0.144035	1.24238	1.24238
CHST9	ENST00000580774.2	0.000211294	0.00723474	-1.6748	0.452025	4.1607	0.957691	0.250109	-0.104859	0.0563811	0.0563811
GFRA1	ENST00000369236.5	0.000219865	0.00747827	-0.670294	0.181405	5.52197	0.174277	0.0277935	0.0215679	0.0178025	0.0215679
SPRY1	ENST00000515726.1	0.000221887	0.00753338	-0.842862	0.228251	4.18871	0.240024	0.0236003	0.0100239	0.0545474	0.0545474
CSDC2	ENST00000306149.12	0.000222399	0.00754701	-2.3122	0.626255	2.74416	1.65196	0.203744	-0.143652	0.384548	0.384548
C1orf21	ENST00000367514.7	0.000227379	0.00768931	-0.752842	0.204217	4.45216	0.176177	0.0213745	-0.013692	0.0411825	0.0411825
GABRA2	ENST00000507460.1	0.000230368	0.00778164	-1.74483	0.473732	3.04933	0.95124	0.0663801	-0.0189888	0.270253	0.270253
LARP7	ENST00000511529.1	0.000230679	0.00778553	-0.739384	0.200766	6.34993	0.212375	0.00377295	0.0566878	0.0117864	0.0566878
DEPDC7	ENST00000241051.8	0.000231124	0.0077967	-0.635623	0.172615	4.65203	0.141514	0.0103484	0.0150374	0.0343454	0.0343454
GPR162	ENST00000311268.8	0.000237103	0.00797892	-4.31566	1.17407	1.46722	5.75695	0.83699	-0.625142	1.23068	1.23068
TMEM35A	ENST00000372930.5	0.000240616	0.0080613	-0.73146	0.199197	4.35713	0.167211	0.0142138	-0.00583771	0.0453052	0.0453052
SPRY4	ENST00000344120.4	0.000241168	0.00807583	-1.26289	0.343974	7.94413	0.620446	0.000937899	0.176539	0.00796761	0.176539
TMEM121B	ENST00000399875.1	0.00024181	0.00809247	-0.811817	0.221156	4.63915	0.21461	0.0386398	-0.0175198	0.0347254	0.0347254
SLC10A3	ENST00000369649.8	0.000241941	0.00809247	-4.24303	1.15594	1.42837	5.44432	0.737703	-0.683538	1.26658	1.26658
JPH4	ENST00000397118.7	0.000243346	0.0081249	-1.14025	0.310764	4.70779	0.452793	0.112082	-0.0336507	0.0327792	0.0327792
SOBP	ENST00000317357.10	0.000243294	0.0081249	-0.695723	0.189611	4.51217	0.182853	0.0150302	0.0320241	0.0388981	0.0388981
RPS6P12	ENST00000432491.1	0.000243189	0.0081249	-0.815973	0.222377	4.13738	0.224973	0.0161786	0.0153581	0.0579985	0.0579985
COL9A1	ENST00000320755.12	0.000245407	0.00817776	-0.624708	0.170359	5.23894	0.146629	0.0215635	0.0153754	0.0219698	0.0219698
RUNX1T1	ENST00000613302.4	0.000249239	0.00829335	-5.4276	1.48172	2.02066	8.84338	2.50684	-2.49969	0.786402	0.786402
LMOD1	ENST00000367288.5	0.000250831	0.00834225	-1.01069	0.276039	3.8249	0.342908	0.0244596	0.0211128	0.0898367	0.0898367
CREB5	ENST00000357727.7	0.000251245	0.00835196	-1.04865	0.28644	3.83337	0.346405	0.0343762	-0.0137463	0.0886953	0.0886953
ABR	ENST00000612118.4	0.000257993	0.00854311	-0.726328	0.198766	6.11256	0.177871	0.0462683	-0.021762	0.0129935	0.0129935
PALM2AKAP2	ENST00000374525.5	0.000262314	0.0086778	-0.794657	0.217719	7.48318	0.246326	0.00151278	0.0695893	0.0082901	0.0695893
ARVCF	ENST00000495096.5	0.00026531	0.00876418	-0.603089	0.165365	5.02213	0.130428	0.0152737	0.0113675	0.0257449	0.0257449
GULP1	ENST00000409927.5	0.000269468	0.00888859	-0.615744	0.169021	5.01308	0.12551	0.0169359	-0.00222661	0.0259161	0.0259161
TRDN	ENST00000542443.5	0.000273993	0.00900754	-1.56331	0.429632	3.68314	0.800847	0.165332	-0.0807545	0.111544	0.111544
DTX1	ENST00000257600.3	0.00027466	0.0090208	-1.24687	0.342726	3.76682	0.550344	0.0780662	0.0268569	0.0981252	0.0981252
EXOC3L2	ENST00000413988.2	0.000277337	0.0091	-1.14197	0.314108	3.67963	0.417967	0.0358491	-0.00242767	0.112147	0.112147
FNIP1	ENST00000307954.12	0.000282772	0.00925615	-4.92203	1.35571	1.76787	7.29622	1.78269	-1.74731	0.974239	0.974239
SCGB3A2	ENST00000507160.5	0.00028395	0.00929026	-0.597003	0.164486	9.28205	0.139391	0.000102523	0.0404807	0.0103659	0.0404807
LTBP4	ENST00000318809.11	0.000287645	0.00938425	-4.42571	1.22049	2.08966	6.06576	1.49511	-1.258	0.739273	0.739273
LRRC37A6P	ENST00000448648.2	0.000290295	0.00945267	-1.00906	0.278453	3.97001	0.35198	0.043761	0.014388	0.0725431	0.0725431
MYO18A	ENST00000531253.5	0.000290696	0.00946125	-0.723602	0.1997	6.50009	0.181461	0.0487322	-0.0182553	0.0110876	0.0110876
EHBP1	ENST00000431489.5	0.000297223	0.00963246	-1.12417	0.310742	6.21615	0.495002	0.103653	0.0411877	0.012443	0.0411877
KCNS3	ENST00000304101.9	0.000297739	0.00964459	-0.884907	0.244635	5.81214	0.306734	0.0680619	0.0217073	0.0149648	0.0217073
ANK3	ENST00000373820.5	0.00029817	0.00965398	-0.706088	0.19522	5.23471	0.186749	0.0351273	0.0113494	0.0220389	0.0220389
GNG11	ENST00000248564.5	0.000306716	0.00985148	-0.936451	0.259436	3.96875	0.33156	0.0282871	0.0573104	0.0726737	0.0726737
CPEB4	ENST00000265085.10	0.000312908	0.0100409	-0.997804	0.276832	4.23688	0.337797	0.0633438	-0.0144524	0.0516099	0.0516099
TKT	ENST00000460343.5	0.00031467	0.0100833	-0.79884	0.221721	4.29728	0.198424	0.0254662	-0.0167402	0.0482738	0.0482738
ACTC1	ENST00000290378.5	0.000320541	0.0102379	-0.939313	0.261057	5.5513	0.346474	0.00616343	0.0960631	0.0174553	0.0960631
HMGCR	ENST00000343975.9	0.00032408	0.01033	-0.772808	0.214953	6.60795	0.234615	0.0262149	0.043092	0.010609	0.043092
NPPB	ENST00000376468.4	0.00032418	0.01033	-3.68442	1.02482	1.14906	4.42928	0.0327547	0.413246	1.54264	1.54264
PPM1B	ENST00000459690.5	0.000327012	0.0104057	-0.807441	0.224732	4.50313	0.219192	0.0365285	-0.00702403	0.0392282	0.0392282
NEURL1	ENST00000369780.8	0.000328557	0.01045	-1.70274	0.474079	3.44819	1.13949	0.0610661	0.27606	0.159047	0.27606
CORO1A	ENST00000219150.9	0.000331761	0.0105372	-0.792163	0.220711	5.59037	0.246713	0.0158655	0.0572043	0.0170172	0.0572043
AGRN	ENST00000461111.1	0.00033587	0.010643	-0.691318	0.192786	5.44939	0.187976	0.00983349	0.0459161	0.0187346	0.0459161
ZBTB44	ENST00000530205.5	0.000340141	0.0107527	-1.08607	0.303148	5.11203	0.358041	0.113736	-0.108515	0.0241115	0.0241115
USP9X	ENST00000462850.1	0.000348132	0.0109606	-4.00191	1.11892	2.04229	5.48665	1.10656	-0.253967	0.771423	0.771423
YIPF4	ENST00000437765.1	0.000348807	0.0109768	-0.793842	0.221988	4.23643	0.20141	0.0222817	-0.00683895	0.0516362	0.0516362
GFOD1	ENST00000379287.4	0.000352876	0.0110793	-1.06514	0.298105	5.20502	0.385165	0.110773	-0.0547605	0.0225272	0.0225272
VIL1	ENST00000248444.9	0.000353303	0.0110876	-0.720475	0.20166	5.40124	0.204526	0.0231066	0.0378938	0.0194164	0.0378938
THY1	ENST00000528522.5	0.000354217	0.0111012	-2.29691	0.643025	3.71015	2.07891	0.338725	0.281497	0.107018	0.281497
PIF1	ENST00000558380.1	0.000354658	0.0111052	-0.890452	0.249307	4.10262	0.26317	0.0326439	-0.00102118	0.060587	0.060587
CAV2	ENST00000222693.5	0.000356533	0.011138	-0.710762	0.199075	4.41467	0.156294	0.0167162	-0.0107914	0.0427298	0.0427298
MORF4L1	ENST00000331268.9	0.000360461	0.0112483	-0.61068	0.171181	5.26154	0.134975	0.0223509	0.00651945	0.0216034	0.0216034
SKA2	ENST00000581068.5	0.000360557	0.0112483	-0.728201	0.204127	4.63012	0.188915	0.0275055	0.00978498	0.0349963	0.0349963
WDR91	ENST00000354475.5	0.00036212	0.0112764	-0.611447	0.171453	5.2451	0.135186	0.0222248	0.00655725	0.0218697	0.0218697
TCF12	ENST00000559710.5	0.000367284	0.0114089	-4.84318	1.35947	1.76591	7.05169	1.79647	-1.778	0.975785	0.975785
HMGCS1	ENST00000433297.2	0.000367373	0.0114089	-1.25883	0.353359	8.16268	0.625233	0.000352175	0.186942	0.00800462	0.186942
PHF21B	ENST00000495348.1	0.00036793	0.011421	-0.960499	0.269646	3.85475	0.341603	0.0231721	0.0578717	0.085891	0.085891
TXNRD2	ENST00000495655.2	0.000370527	0.0114912	-2.5979	0.729698	2.53197	2.22919	0.315481	-0.0598874	0.483209	0.483209
CHST9	ENST00000581714.5	0.000370982	0.0115001	-0.822197	0.23096	4.67678	0.266813	0.0457439	0.0342699	0.0336348	0.0342699
SELENOM	ENST00000400299.6	0.000371154	0.0115002	-0.645193	0.181245	4.55364	0.131345	0.0118307	-0.00375201	0.0374438	0.0374438
RAF1	ENST00000432427.2	0.000373716	0.0115715	-0.75578	0.212418	5.30492	0.173159	0.0467725	-0.0445252	0.0209098	0.0209098
SERPINB3	ENST00000283752.10	0.000376447	0.0116326	-1.71749	0.482976	3.35571	0.892213	0.168169	-0.159072	0.181729	0.181729
SCNN1G	ENST00000300061.3	0.000377964	0.0116742	-2.20738	0.620919	3.23146	1.9244	0.0889228	0.489389	0.215434	0.489389
PLA2G3	ENST00000215885.4	0.000378933	0.0116936	-1.07907	0.303593	5.61479	0.459922	0.0043852	0.133868	0.0167566	0.133868
DISP3	ENST00000294484.7	0.000384241	0.0118201	-0.78712	0.221682	4.15047	0.211332	0.0166347	0.0151967	0.0570794	0.0570794
CTXN1	ENST00000318978.6	0.000397946	0.0121677	-0.65461	0.184843	5.84397	0.169555	0.00267827	0.048572	0.01472	0.048572
HMGCR	ENST00000287936.9	0.000397992	0.0121677	-0.743355	0.209903	8.06509	0.218644	0.00204074	0.0640485	0.00797302	0.0640485
PPP2R2B	ENST00000530902.5	0.000397689	0.0121677	-5.02563	1.41902	1.81967	7.60696	2.0865	-2.04914	0.933933	0.933933
SYNPO2	ENST00000610556.4	0.000399852	0.0122125	-0.6453	0.182279	4.66391	0.126027	0.0158371	-0.014458	0.0340013	0.0340013
SLC30A3	ENST00000233535.8	0.000402148	0.0122553	-0.978656	0.27656	4.11452	0.310542	0.055052	-0.0260374	0.0596766	0.0596766
RNF217	ENST00000560949.5	0.000402083	0.0122553	-3.44371	0.973153	1.94581	4.56865	0.580906	0.682738	0.839633	0.839633
FGFR2	ENST00000369061.8	0.000402343	0.0122558	-4.89138	1.38231	1.75254	7.24587	1.87981	-1.79456	0.986382	0.986382
MYMX	ENST00000573382.2	0.000407121	0.0123628	-1.92207	0.543659	3.0186	1.18966	0.163047	-0.0613541	0.280301	0.280301
GULP1	ENST00000476422.5	0.000407429	0.0123667	-0.794689	0.224792	4.86879	0.221564	0.0469369	-0.00680628	0.02886	0.02886
AATK	ENST00000417379.5	0.000411823	0.0124559	-4.19134	1.18654	1.40252	5.44092	0.82103	-0.60762	1.2908	1.2908
EGLN3	ENST00000547327.2	0.000413574	0.0125033	-1.34863	0.381912	3.44529	0.592495	0.0590604	-0.000496111	0.159725	0.159725
TMEM18	ENST00000405941.3	0.000427652	0.0128664	-3.93961	1.11844	1.69951	4.90198	0.847195	-0.539901	1.02917	1.02917
BCL9L	ENST00000334801.7	0.000429342	0.0129059	-0.666653	0.189317	6.80256	0.176337	0.0100007	0.0437607	0.00986584	0.0437607
RNF112	ENST00000461366.2	0.000446012	0.0133135	-1.45141	0.41336	3.32033	0.648865	0.0653305	-0.0442203	0.19097	0.19097
OSBPL10	ENST00000466604.5	0.00045608	0.0135607	-1.99145	0.568125	3.38543	1.31063	0.309945	-0.158861	0.174205	0.174205
KLHL29	ENST00000486442.6	0.000465124	0.0137877	-0.832603	0.237881	4.18474	0.234323	0.0300797	0.0028627	0.0548017	0.0548017
ANKRD50	ENST00000515641.1	0.000469174	0.0138658	-0.627039	0.179269	5.32976	0.123712	0.0276881	-0.0204899	0.0205177	0.0205177
TSPAN2	ENST00000369516.7	0.000470311	0.0138933	-0.586205	0.167625	5.31023	0.136809	0.00724995	0.0348973	0.0208258	0.0348973
CD248	ENST00000311330.4	0.000472226	0.0139319	-1.6161	0.462265	3.14918	0.809847	0.081049	-0.0481527	0.239485	0.239485
PTPRD	ENST00000356435.9	0.00047553	0.0140113	-0.629678	0.180208	5.81635	0.127238	0.0337805	-0.0234185	0.0149318	0.0149318
PTPRD	ENST00000634608.1	0.00047553	0.0140113	-0.629678	0.180208	5.81635	0.127238	0.0337805	-0.0234185	0.0149318	0.0149318
WRBP1	ENST00000423352.2	0.000482595	0.0141828	-1.04192	0.298524	3.73466	0.40493	0.030602	0.0684622	0.103073	0.103073
HNRNPA2B1	ENST00000354667.8	0.000485992	0.0142642	-5.20955	1.49341	3.38589	10.8181	1.26425	2.08115	0.17409	2.08115
HAUS3	ENST00000243706.8	0.000488751	0.0143268	-0.654291	0.187645	4.6457	0.131566	0.0182849	-0.0143634	0.0345313	0.0345313
NFE2L3	ENST00000056233.4	0.000489649	0.0143408	-0.885503	0.253991	7.50997	0.312649	0.0016023	0.0951649	0.00825613	0.0951649
GORASP1	ENST00000422110.6	0.000492761	0.0144135	-4.30272	1.23476	2.48486	6.99754	1.77979	0.0246183	0.507159	0.507159
UNC5D	ENST00000287272.6	0.000512889	0.0148562	-0.653404	0.188088	7.05233	0.170533	0.0151626	0.0379029	0.00911724	0.0379029
TERF1	ENST00000518961.1	0.000514209	0.0148881	-1.32364	0.381096	4.97518	0.699885	0.019681	0.19817	0.0266487	0.19817
PARP6	ENST00000567440.5	0.000518689	0.0150052	-4.64263	1.33758	1.62827	6.65223	1.59513	-1.36258	1.08855	1.08855
PROCR	ENST00000216968.5	0.000521078	0.0150615	-0.650332	0.187433	6.02574	0.169037	0.00216149	0.0505351	0.0134959	0.0505351
TPM1	ENST00000560131.1	0.00054028	0.0155313	-2.28948	0.66171	2.65102	1.64708	0.230842	-0.137638	0.425949	0.425949
GRK5	ENST00000392870.2	0.000541351	0.0155475	-0.837296	0.242034	4.04437	0.241034	0.0224516	0.0159424	0.0654191	0.0654191
TRERF1	ENST00000372922.8	0.000545319	0.0156367	-0.770624	0.222888	5.7709	0.2233	0.0592203	-0.00279293	0.0152983	0.0152983
OPA1	ENST00000361908.8	0.000549435	0.0157416	-0.633876	0.183444	6.79699	0.160921	0.03154	0.0189374	0.00988505	0.0189374
TM4SF18	ENST00000296059.7	0.000552303	0.0157907	-2.48707	0.720051	2.44428	2.15527	0.249355	0.125174	0.528354	0.528354
PKHD1L1	ENST00000526472.1	0.000560269	0.0159784	-2.5619	0.742547	2.42221	2.29897	0.286973	0.125483	0.540092	0.540092
PTGS1	ENST00000362012.7	0.000566767	0.0161215	-2.66836	0.774103	2.15081	2.85513	0.0763175	0.822537	0.699139	0.822537
NA	ENST00000614910.6	0.000566767	0.0161215	-2.66836	0.774103	2.15081	2.85513	0.0763175	0.822537	0.699139	0.822537
RAPGEF2	ENST00000505478.5	0.000575081	0.0162996	-0.697175	0.202484	4.45108	0.17616	0.020274	0.0176569	0.0412259	0.0412259
FGF2	ENST00000644866.2	0.000575658	0.0163086	-1.35571	0.393779	7.37702	0.737461	0.0337517	0.198841	0.00844399	0.198841
PTAR1	ENST00000340434.5	0.000577716	0.0163601	-0.682276	0.198229	7.35195	0.186804	0.00553237	0.0534094	0.00848491	0.0534094
C1orf210	ENST00000523677.5	0.000582255	0.0164682	-0.654261	0.190206	5.0946	0.171831	0.00675432	0.0475133	0.0244194	0.0475133
FAM189A2	ENST00000455972.6	0.000584578	0.0165202	-1.08119	0.314422	4.97814	0.417427	0.121701	-0.0382838	0.0265905	0.0265905
TNFRSF11A	ENST00000639222.1	0.00058667	0.0165588	-3.18009	0.925064	1.97378	3.22422	0.464122	-0.226227	0.819492	0.819492
CAV1	ENST00000393467.1	0.000597027	0.0168027	-1.50495	0.438382	5.35202	0.910076	0.249196	0.0390723	0.0201688	0.0390723
AQP4	ENST00000383168.9	0.000605049	0.0170214	-1.15569	0.336999	3.78806	0.536965	0.0376658	0.132687	0.0949999	0.132687
KIF13A	ENST00000378814.9	0.000617108	0.0172826	-0.592729	0.173111	6.23178	0.127266	0.0325876	-0.00525343	0.0123636	0.0123636
RTN4	ENST00000405240.5	0.000618492	0.0173001	-0.721505	0.210759	6.68772	0.202995	0.0563426	0.0021873	0.0102862	0.0102862
SLITRK3	ENST00000241274.3	0.000622006	0.0173771	-4.19207	1.22509	2.61464	7.07306	0.613043	1.63824	0.442938	1.63824
HESX1	ENST00000295934.8	0.000635167	0.0177014	-2.52049	0.737818	3.56594	2.41531	0.683163	-0.0463462	0.1334	0.1334
AC138969.1	ENST00000524823.6	0.000641005	0.017823	-0.809037	0.237001	4.59584	0.262119	0.0481962	0.0340002	0.0360579	0.0360579
VWA3B	ENST00000489968.5	0.000641091	0.017823	-1.42565	0.417637	3.23373	0.676497	0.0468422	0.0366024	0.214788	0.214788
BNC1	ENST00000345382.6	0.000645243	0.0179093	-3.24467	0.951002	1.54869	3.64277	0.199187	0.406307	1.15742	1.15742
SEMA3F	ENST00000413852.5	0.000646388	0.0179338	-4.25707	1.24791	2.65633	7.30552	1.65335	0.682564	0.423506	0.682564
S100A16	ENST00000368706.9	0.000647841	0.0179595	-0.779565	0.228561	4.45327	0.237255	0.0372217	0.0314516	0.0411385	0.0411385
MT1F	ENST00000334350.7	0.000651486	0.0180241	-0.978948	0.287147	4.21122	0.386446	0.020281	0.103399	0.0531422	0.103399
RAB17	ENST00000264601.8	0.000655119	0.0181069	-3.48765	1.02346	3.06851	4.90608	0.843088	0.728118	0.264147	0.728118
SMPDL3B	ENST00000373888.8	0.000656639	0.0181373	-0.855182	0.251002	5.45041	0.295003	0.0210743	0.0734288	0.0187208	0.0734288
SLC2A6	ENST00000371899.9	0.000658887	0.0181848	-0.837343	0.245834	4.26841	0.282864	0.038128	0.0525232	0.049823	0.0525232
SLC2A6	ENST00000626271.3	0.000658887	0.0181848	-0.837343	0.245834	4.26841	0.282864	0.038128	0.0525232	0.049823	0.0525232
MICAL1	ENST00000465904.1	0.000659979	0.0182075	-0.892826	0.262157	4.00542	0.253839	0.0340775	-0.015706	0.0690123	0.0690123
ZSCAN2	ENST00000379358.7	0.000661932	0.0182467	-0.728235	0.21388	4.65675	0.213991	0.0138068	0.05481	0.034208	0.05481
APELA	ENST00000510062.5	0.000667439	0.0183616	-3.03101	0.890787	2.22967	3.44247	0.540538	0.317427	0.649714	0.649714
CTSC	ENST00000533897.1	0.000668156	0.0183739	-0.644702	0.189489	4.53472	0.130204	0.0157635	-0.00887386	0.0380955	0.0380955
PDE4DIP	ENST00000479408.6	0.000672024	0.0184506	-0.953384	0.280346	5.29251	0.366994	0.0182435	0.0996469	0.0211071	0.0996469
ZNF184	ENST00000377419.1	0.000672978	0.0184694	-0.679285	0.199769	5.5526	0.16494	0.0424208	-0.00928166	0.0174404	0.0174404
USO1	ENST00000264904.8	0.000681988	0.0186643	-0.588101	0.173138	6.00573	0.131465	0.0313469	0.00328576	0.0136182	0.0136182
KCNJ6	ENST00000645093.1	0.000688535	0.0187908	-1.91928	0.565475	3.09097	1.16933	0.222497	-0.142206	0.257146	0.257146
NAV3	ENST00000550042.2	0.000691317	0.0188593	-2.68473	0.791255	2.30759	2.28755	0.335601	-0.179078	0.603527	0.603527
LRRC4B	ENST00000599957.5	0.000694603	0.0189187	-4.18561	1.23407	1.39966	5.35059	0.990907	-0.872412	1.2935	1.2935
FAM131B	ENST00000409346.5	0.000694593	0.0189187	-4.68975	1.38271	2.97954	8.71799	2.5743	0.0755428	0.293535	0.293535
FAT2	ENST00000261800.5	0.000701799	0.0190694	-1.50403	0.443814	3.31666	0.815554	0.10351	0.0676436	0.191946	0.191946
NLGN3	ENST00000476589.1	0.000707615	0.0191816	-4.18681	1.23628	2.97064	7.0929	1.50162	0.790978	0.296622	0.790978
GPR1	ENST00000621141.4	0.000709236	0.0192068	-2.58546	0.763578	2.02893	2.64419	0.0939232	0.704582	0.780654	0.780654
GPR1	ENST00000638097.1	0.000709236	0.0192068	-2.58546	0.763578	2.02893	2.64419	0.0939232	0.704582	0.780654	0.780654
CCL2	ENST00000225831.4	0.000723967	0.0195068	-1.67247	0.494764	3.11307	1.03106	0.116801	0.123096	0.250387	0.250387
BAG6	ENST00000449874.5	0.000727217	0.0195811	-3.95674	1.17094	1.29134	4.70251	0.658601	-0.651383	1.39806	1.39806
ATF7IP2	ENST00000396559.5	0.000729204	0.0196268	-4.18229	1.23797	1.398	5.5184	1.00377	-0.665104	1.29507	1.29507
PFKM	ENST00000546964.5	0.000729738	0.0196335	-1.26748	0.3752	5.26654	0.509954	0.189639	-0.154639	0.0215229	0.0215229
COL13A1	ENST00000520267.5	0.00074345	0.0199241	-3.84101	1.13874	1.23193	4.49342	0.487671	-0.403396	1.45742	1.45742
ASTN1	ENST00000361833.7	0.000745412	0.0199533	-0.73989	0.219402	4.70113	0.221996	0.0150335	0.0571721	0.0329599	0.0571721
FDFT1	ENST00000530664.5	0.000754755	0.0201561	-2.44739	0.72647	3.19784	2.12802	0.566522	-0.152632	0.225116	0.225116
IFITM2	ENST00000399817.8	0.000760241	0.0202709	-0.654346	0.194348	5.91276	0.163331	0.0424322	0.00116787	0.0142245	0.0142245
DAB2	ENST00000320816.11	0.000759957	0.0202709	-0.926115	0.275058	4.88262	0.302668	0.0849273	-0.0282252	0.0285581	0.0285581
ELMOD3	ENST00000393852.8	0.000776842	0.0206412	-4.39504	1.30769	1.50437	5.86885	1.36815	-1.27572	1.19693	1.19693
FGFR2	ENST00000357555.9	0.000777588	0.020645	-3.40322	1.01267	2.02085	4.70516	0.301272	1.23697	0.78627	1.23697
TNFAIP2	ENST00000333007.6	0.000779299	0.0206753	-1.67572	0.498719	4.30752	0.984806	0.325338	-0.147342	0.0477434	0.0477434
ARHGEF10L	ENST00000375415.5	0.000779335	0.0206753	-0.730771	0.217489	5.10534	0.21697	0.0283716	0.0425807	0.0242293	0.0425807
IQSEC2	ENST00000639642.1	0.000786327	0.0208447	-3.35852	1.00028	1.43035	3.76671	0.236122	0.242402	1.26473	1.26473
MT1H	ENST00000332374.4	0.000795261	0.0210408	-1.70809	0.509202	3.49956	1.18641	0.0526517	0.336278	0.147404	0.336278
LRRTM4	ENST00000409088.3	0.000797383	0.0210806	-0.966503	0.28819	4.31036	0.379903	0.0725984	0.0519818	0.047598	0.0519818
U2AF1	ENST00000380276.6	0.000800693	0.0211385	-4.63121	1.3814	1.62252	6.5112	1.76895	-1.673	1.09344	1.09344
CTNNA2	ENST00000496558.5	0.000804219	0.021204	-1.37556	0.410452	4.97527	0.695516	0.226059	-0.0662277	0.026647	0.026647
SERTM1	ENST00000315190.4	0.000810208	0.0213208	-1.09909	0.328156	3.61413	0.491621	0.0346998	0.126829	0.123974	0.126829
BTBD11	ENST00000280758.10	0.000815487	0.0214268	-1.1284	0.337088	4.34851	0.480498	0.124729	-0.00158553	0.0457139	0.0457139
CNTN2	ENST00000331830.7	0.000826297	0.0216609	-3.11211	0.930701	2.5738	3.94501	0.694097	0.60521	0.462546	0.60521
TNNT1	ENST00000585321.6	0.00083226	0.0217839	-0.592693	0.177356	5.22779	0.113034	0.0250305	-0.0154699	0.022152	0.022152
TCEAL4	ENST00000415568.2	0.000836555	0.0218629	-5.17711	1.54985	1.90904	8.12666	2.73648	-2.6291	0.866549	0.866549
NTN4	ENST00000538383.5	0.000842383	0.0219816	-3.65448	1.09466	1.30525	4.06013	0.413042	-0.346103	1.38436	1.38436
OBSL1	ENST00000373873.8	0.000850831	0.0221345	-0.675106	0.202388	5.50036	0.183294	0.0433725	0.0148323	0.0180687	0.0180687
MACF1	ENST00000289893.8	0.00086064	0.0223727	-0.962497	0.28882	5.67075	0.37802	0.0245824	0.100543	0.0161947	0.100543
STC1	ENST00000290271.7	0.00086364	0.0224275	-1.65653	0.497224	6.87911	1.1199	0.00163869	0.36921	0.00961319	0.36921
ARHGAP11A	ENST00000565905.5	0.000875493	0.0226813	-0.662903	0.199204	6.63832	0.171881	0.0490406	0.00102028	0.010483	0.010483
TGIF2	ENST00000373872.8	0.00087735	0.0227036	-0.816992	0.245552	5.82764	0.224492	0.0755995	-0.0452874	0.0148443	0.0148443
CA10	ENST00000442502.6	0.000881224	0.0227866	-3.97267	1.19445	1.29319	4.77943	0.743848	-0.687858	1.39623	1.39623
DCC	ENST00000442544.7	0.000889235	0.0229505	-3.78065	1.13758	2.31368	5.84092	0.702537	1.2386	0.600024	1.2386
TULP1	ENST00000229771.11	0.000893702	0.0230571	-3.52055	1.05976	2.26783	5.06601	0.804852	0.879799	0.626765	0.879799
TTC23	ENST00000459771.5	0.000900674	0.0232019	-4.75858	1.43338	1.69047	6.86206	2.04526	-1.95923	1.03659	1.03659
HNRNPU	ENST00000366525.8	0.000901102	0.0232042	-0.746776	0.224952	7.13771	0.227712	0.0669959	0.00851595	0.00890917	0.00890917
SLITRK4	ENST00000338017.8	0.00090156	0.0232073	-0.959781	0.289128	4.78231	0.376668	0.0249791	0.100413	0.030865	0.100413
RGS2	ENST00000235382.7	0.000957313	0.0243285	-0.621507	0.188177	5.68945	0.158374	0.00361683	0.049499	0.0160172	0.049499
COL26A1	ENST00000313669.12	0.000957559	0.0243285	-0.652652	0.197611	6.39578	0.174647	0.0298846	0.0286906	0.0115704	0.0286906
ASB8	ENST00000536549.5	0.00096438	0.0244655	-4.54026	1.37554	1.57698	6.38141	1.70553	-1.45901	1.13263	1.13263
HSP90AA1	ENST00000554401.1	0.000974357	0.0246182	-0.83738	0.253919	5.18093	0.232713	0.0737829	-0.0458442	0.0229292	0.0229292
CAPRIN1	ENST00000530820.5	0.000979532	0.0247125	-4.88048	1.48057	3.29426	9.77624	1.90264	1.38551	0.197965	1.38551
EPB41L4B	ENST00000374557.4	0.000979966	0.0247144	-0.798301	0.242187	6.53541	0.261571	0.00131241	0.0866695	0.0109258	0.0866695
PCDH1	ENST00000394536.4	0.000982243	0.0247444	-1.53524	0.465851	6.42387	0.967509	0.0279919	0.297533	0.0114395	0.297533
UCHL1	ENST00000508768.5	0.000983515	0.0247582	-3.55452	1.0787	2.07453	5.18668	0.553974	1.1914	0.749442	1.1914
RRAGD	ENST00000492783.1	0.00102131	0.025578	-1.11424	0.339233	3.72337	0.383102	0.0677473	-0.0544446	0.104871	0.104871
SPATS2L	ENST00000409385.5	0.00104163	0.0260012	-4.52274	1.37929	1.56823	6.56154	1.7134	-1.18218	1.14027	1.14027
FGF16	ENST00000439435.2	0.00104531	0.0260742	-2.23541	0.681935	2.56173	1.50765	0.229105	-0.218438	0.468449	0.468449
SALL2	ENST00000541965.1	0.00105335	0.0262554	-3.23732	0.988232	1.90141	4.316	0.114177	1.35073	0.872198	1.35073
FDFT1	ENST00000220584.9	0.00106506	0.0264798	-1.07465	0.328361	7.08806	0.475844	0.00839092	0.153341	0.00902736	0.153341
TCF7L2	ENST00000536810.5	0.00108209	0.026835	-0.803227	0.245765	5.92814	0.266033	0.0604468	0.0301542	0.0141195	0.0301542
KCNA1	ENST00000382545.5	0.00108431	0.0268707	-3.48496	1.06649	1.04933	3.7416	0.0571171	0.0655211	1.649	1.649
CYBRD1	ENST00000321348.9	0.00108741	0.0269304	-1.09435	0.334982	4.62056	0.384547	0.133033	-0.101446	0.035287	0.035287
NLGN3	ENST00000536169.5	0.00108751	0.0269304	-4.39556	1.3455	1.50463	5.84463	1.51887	-1.45842	1.1967	1.1967
EIF3K	ENST00000592558.1	0.00109151	0.0270099	-0.655005	0.200564	4.80186	0.174733	0.0299461	0.0275833	0.030393	0.030393
EIF3K	ENST00000634491.1	0.00109151	0.0270099	-0.655005	0.200564	4.80186	0.174733	0.0299461	0.0275833	0.030393	0.030393
PTMA	ENST00000341369.11	0.00109273	0.0270303	-0.63652	0.194923	8.08359	0.167141	0.00221411	0.0547784	0.00797714	0.0547784
ACLY	ENST00000590151.5	0.00109366	0.0270317	-0.928465	0.284347	7.42491	0.349952	0.112909	0.00126358	0.00837072	0.00837072
PKP1	ENST00000367324.7	0.00109956	0.0271316	-2.84176	0.87071	1.84	2.80599	0.21883	0.260308	0.918373	0.918373
SREBF2	ENST00000612482.4	0.00111417	0.0274318	-5.32971	1.63489	1.98779	8.70586	3.19976	-2.96961	0.809513	0.809513
NECTIN3	ENST00000491525.5	0.00111992	0.0275316	-4.07253	1.24981	1.34312	5.01404	0.995545	-0.947569	1.34748	1.34748
RASSF5	ENST00000577571.5	0.00113147	0.0277678	-4.21193	1.29374	1.41282	5.34155	1.22954	-1.20523	1.28112	1.28112
DHRS3	ENST00000616661.5	0.00115422	0.0282149	-1.28934	0.396726	5.44233	0.68759	0.00605011	0.230037	0.0188313	0.230037
RAB24	ENST00000495458.5	0.00115509	0.0282261	-4.30444	1.32455	1.45907	5.68617	1.39349	-1.23386	1.23815	1.23815
UGP2	ENST00000475550.5	0.00116576	0.0283957	-0.607718	0.187155	4.97069	0.152829	0.012343	0.0401978	0.0267372	0.0401978
PSENEN	ENST00000587708.7	0.00117004	0.0284796	-0.752648	0.231863	4.71882	0.172521	0.0481572	-0.044936	0.0324837	0.0324837
SPRY4	ENST00000434127.2	0.00117147	0.0284946	-1.27325	0.392284	5.53094	0.671014	0.0167932	0.214037	0.0176945	0.214037
RMI2	ENST00000572992.1	0.00117576	0.028568	-0.927337	0.285801	3.79067	0.317261	0.0279005	0.0461927	0.0946226	0.0946226
IRAK3	ENST00000261233.8	0.0011814	0.0286949	-1.02763	0.316845	4.02726	0.437278	0.0257309	0.124855	0.0669614	0.124855
ANO1	ENST00000531349.5	0.00118286	0.0287202	-3.05609	0.942372	2.36153	3.86759	0.620714	0.711383	0.573101	0.711383
BCLAF1	ENST00000527759.5	0.00121291	0.0293664	-4.50766	1.39305	2.94082	8.4244	2.00235	0.908526	0.30717	0.908526
FAM169A	ENST00000389156.9	0.00122561	0.0296215	-0.665297	0.205793	6.98115	0.183607	0.00722633	0.0562996	0.00930875	0.0562996
PDGFRA	ENST00000507536.1	0.00124484	0.0300225	-2.11851	0.656209	2.82631	1.75635	0.29535	0.21706	0.350566	0.350566
SLC19A3	ENST00000431622.6	0.00125191	0.030172	-4.16667	1.29128	1.39019	5.54012	1.19865	-0.783923	1.30245	1.30245
GNG2	ENST00000556752.2	0.00126618	0.03043	-0.888255	0.275553	5.34807	0.327815	0.0390962	0.074798	0.0202306	0.074798
TPM1	ENST00000651577.1	0.00126867	0.0304687	-2.82788	0.877414	2.33919	3.3229	0.198399	0.956383	0.585549	0.956383
EDNRB	ENST00000475537.2	0.00127293	0.0305472	-3.18272	0.987805	2.81657	4.01584	1.10917	0.111994	0.354469	0.354469
PGGHG	ENST00000409479.5	0.00127632	0.0305986	-0.695921	0.21604	5.06721	0.193239	0.045099	0.0148356	0.0249112	0.0249112
RGMA	ENST00000650169.1	0.00131602	0.0313854	-3.85184	1.19903	1.23277	4.47997	0.699936	-0.663711	1.45657	1.45657
PHF19	ENST00000312189.10	0.00131895	0.0314444	-1.0129	0.315367	4.43438	0.42714	0.025259	0.123926	0.0419042	0.123926
B4GALT6	ENST00000306851.9	0.00132823	0.0316106	-0.827108	0.257681	4.44108	0.222896	0.0579698	-0.0358907	0.0416298	0.0416298
MAGED4B	ENST00000470594.5	0.00132975	0.0316358	-0.61306	0.191015	4.80294	0.120281	0.0243631	-0.0149527	0.0303672	0.0303672
SPTSSB	ENST00000497137.1	0.00133374	0.0317085	-2.82295	0.879802	2.11809	3.31958	0.352167	0.808911	0.72042	0.808911
GABBR1	ENST00000458612.6	0.00133791	0.0317858	-0.590595	0.184117	5.51886	0.12519	0.0330082	-0.00732123	0.0178403	0.0178403
LCP1	ENST00000323076.7	0.00134116	0.0318519	-0.670219	0.208985	6.87346	0.187167	0.00217729	0.0633346	0.00963111	0.0633346
SC5D	ENST00000392789.2	0.00134376	0.0318916	-0.602358	0.187857	6.75328	0.151199	0.00190201	0.0510335	0.01004	0.0510335
PLA2G4A	ENST00000367466.4	0.00134467	0.0319021	-0.636213	0.198428	4.36483	0.13358	0.0141148	0.00107285	0.0449455	0.0449455
TRAPPC8	ENST00000283351.9	0.00134522	0.031904	-0.696534	0.217249	6.28509	0.202184	0.0156616	0.0551341	0.0120987	0.0551341
LRRC15	ENST00000347624.3	0.00135247	0.0320316	-3.44	1.07345	1.02685	3.56769	0.0549059	-0.0328834	1.67355	1.67355
TMEM26	ENST00000399298.7	0.00135786	0.0321369	-2.17698	0.679572	2.58238	1.54513	0.234348	-0.0801543	0.458379	0.458379
PRMT1	ENST00000527382.5	0.00137577	0.0324821	-4.20789	1.31509	1.4108	5.54814	1.31119	-1.01587	1.28302	1.28302
TMEM125	ENST00000439858.6	0.00137918	0.0325515	-3.93717	1.23076	3.40419	6.27164	2.10259	-0.0760383	0.169566	0.169566
TNIP1	ENST00000521591.5	0.00137966	0.0325516	-4.48057	1.40067	1.54726	6.32705	1.78414	-1.40366	1.15868	1.15868
ATE1	ENST00000543447.5	0.00138057	0.0325537	-4.12531	1.28969	1.36951	5.20873	1.17283	-1.04375	1.32213	1.32213
TSEN54	ENST00000578415.1	0.0013807	0.0325537	-4.08383	1.27673	1.34877	5.00499	1.10305	-1.10096	1.34203	1.34203
DGLUCY	ENST00000428926.6	0.00138492	0.0326195	-4.61437	1.44299	1.61404	6.56919	2.02268	-1.79585	1.10067	1.10067
BICDL1	ENST00000397558.6	0.00139025	0.0326969	-0.60668	0.189785	4.99308	0.15364	0.00997548	0.0440522	0.0262996	0.0440522
TCF15	ENST00000246080.3	0.00139588	0.0327986	-0.866912	0.271291	3.86236	0.234217	0.0254808	-0.0145356	0.0849177	0.0849177
SIRT6	ENST00000601488.5	0.0014023	0.0328817	-3.83165	1.19957	1.22268	4.57461	0.691676	-0.478995	1.46679	1.46679
CELF5	ENST00000541430.6	0.00140561	0.0329255	-0.91192	0.285555	3.85763	0.299701	0.0367916	0.0259859	0.0855212	0.0855212
PLEKHA6	ENST00000637508.1	0.00141637	0.0331322	-3.19867	1.00231	2.71456	4.19295	1.10957	0.294805	0.397374	0.397374
SLC37A2	ENST00000354617.5	0.00142308	0.0332181	-0.605422	0.189792	4.4672	0.137057	0.0134429	0.0204268	0.0405885	0.0405885
PPM1B	ENST00000282412.9	0.00142307	0.0332181	-0.74957	0.23498	7.35562	0.234815	0.00209103	0.0807324	0.00847881	0.0807324
KCND3	ENST00000369697.5	0.00142449	0.0332312	-1.92987	0.605042	2.73316	1.49551	0.159834	0.312909	0.38928	0.38928
ARHGEF5	ENST00000498580.5	0.0014255	0.0332374	-0.743072	0.232979	4.48882	0.230782	0.0194931	0.0619256	0.0397605	0.0619256
MYOCD	ENST00000425538.5	0.00142844	0.033278	-0.889966	0.279087	4.78501	0.331079	0.018424	0.0984106	0.030799	0.0984106
TERF1	ENST00000517390.1	0.00144266	0.0335866	-2.25198	0.70684	4.48595	1.6636	0.709566	-0.531842	0.0398688	0.0398688
RAB42	ENST00000373826.3	0.00145632	0.0338125	-0.694664	0.218225	4.32726	0.201914	0.013218	0.0582151	0.0467477	0.0582151
INSYN1	ENST00000569673.2	0.00148465	0.0343306	-0.929077	0.292377	3.80637	0.361437	0.0358341	0.0922687	0.0923924	0.0923924
FGF12	ENST00000445105.6	0.00148719	0.0343777	-0.672092	0.211538	4.3168	0.150061	0.0198513	-0.00166497	0.0472711	0.0472711
ZNF860	ENST00000360311.4	0.00150045	0.0346446	-0.809759	0.255075	4.93668	0.274789	0.0091772	0.0884174	0.0274207	0.0884174
SMIM10L2A	ENST00000417443.3	0.00150076	0.0346446	-0.690573	0.217535	4.7159	0.199853	0.010864	0.0601183	0.0325613	0.0601183
OBSL1	ENST00000462385.1	0.00150544	0.0347174	-1.58629	0.499835	3.04855	0.785964	0.104248	-0.0654154	0.270505	0.270505
ITPRID1	ENST00000615280.4	0.00152282	0.0350474	-2.7552	0.869066	1.86978	2.7419	0.237093	0.343613	0.895819	0.895819
SLC4A8	ENST00000453097.7	0.00152719	0.0351289	-0.747487	0.23584	5.84029	0.177852	0.0686831	-0.0558938	0.0147477	0.0147477
ZNF749	ENST00000597296.1	0.00153405	0.0352584	-0.623937	0.19694	4.4643	0.144456	0.0174757	0.0171077	0.040702	0.040702
MUC1	ENST00000612778.4	0.00154072	0.0353642	-3.87458	1.22346	1.24414	4.51334	0.80018	-0.788134	1.4451	1.4451
HECW1	ENST00000395891.7	0.00154481	0.0354402	-1.15475	0.364721	3.68993	0.489517	0.0891438	0.0227066	0.110388	0.110388
AFF3	ENST00000317233.8	0.0015487	0.0355117	-0.858803	0.27131	4.05099	0.237312	0.0455754	-0.0255144	0.0648379	0.0648379
MRGPRF	ENST00000309099.7	0.0015508	0.0355479	-1.72923	0.546359	4.0145	1.03102	0.379614	-0.212171	0.0681482	0.0681482
TYRO3	ENST00000559851.1	0.00155955	0.0357126	-3.40371	1.07598	2.06573	4.85116	0.981193	0.738282	0.755399	0.755399
CENPH	ENST00000502689.1	0.00157134	0.0359346	-3.74976	1.18619	2.13474	5.37311	1.40104	0.0425674	0.709536	0.709536
UPRT	ENST00000530743.1	0.00159378	0.0363341	-0.694426	0.219961	4.79868	0.173494	0.0421052	-0.00607297	0.030469	0.030469
ARSJ	ENST00000509829.1	0.00159915	0.0364366	-2.94771	0.933983	2.60749	3.65348	0.455784	0.852701	0.446329	0.852701
IQSEC3	ENST00000538872.5	0.00162146	0.0367734	-1.9801	0.6282	2.7285	1.2084	0.200659	-0.16045	0.391294	0.391294
TINAGL1	ENST00000271064.12	0.00163601	0.0370422	-1.1511	0.365496	4.27243	0.495868	0.150779	-0.0278276	0.0496025	0.0496025
NEDD9	ENST00000379446.10	0.0016366	0.0370432	-2.81689	0.894448	4.38962	2.43063	1.15624	-1.09353	0.0438199	0.0438199
CCDC80	ENST00000469554.1	0.00163797	0.0370619	-1.99693	0.634134	2.91306	1.4156	0.28592	-0.0118123	0.31727	0.31727
IL1RAP	ENST00000422485.5	0.00163922	0.037066	-3.90698	1.24077	1.26034	4.67075	0.880418	-0.766164	1.42885	1.42885
SLC50A1	ENST00000368405.7	0.00164334	0.0371345	-1.11229	0.35332	4.04748	0.388724	0.122107	-0.100145	0.0651447	0.0651447
CCDC136	ENST00000480137.1	0.00165628	0.0373774	-0.890016	0.282921	4.31876	0.247031	0.0728944	-0.0611537	0.0471722	0.0471722
COL12A1	ENST00000322507.13	0.00165711	0.0373838	-1.67167	0.53142	5.3505	0.876299	0.403418	-0.355972	0.0201926	0.0201926
SHC3	ENST00000375835.9	0.00166051	0.0374483	-0.618081	0.196524	4.91395	0.160953	0.00917615	0.0487565	0.0278908	0.0487565
CCDC141	ENST00000343876.6	0.00166526	0.0375305	-2.31898	0.737537	3.35085	1.89373	0.63296	-0.282424	0.18298	0.18298
TNFRSF8	ENST00000263932.7	0.00168449	0.0379264	-0.854353	0.272012	5.33306	0.307764	0.0204238	0.0905619	0.0204658	0.0905619
SORBS2	ENST00000448662.6	0.00168841	0.0379772	-3.61832	1.15226	3.40694	5.52093	0.380902	1.61067	0.168894	1.61067
GRM1	ENST00000492807.6	0.00170343	0.0382774	-4.03073	1.28466	1.32222	4.91576	1.10776	-1.05561	1.36776	1.36776
LEFTY1	ENST00000272134.5	0.00170686	0.0383419	-1.46511	0.46704	5.94427	0.905712	0.00407228	0.323118	0.0140115	0.323118
SYTL2	ENST00000389960.8	0.00171071	0.0384031	-3.1812	1.0143	2.86251	4.22711	1.20687	0.282002	0.336349	0.336349
MOB3C	ENST00000319928.7	0.00171524	0.0384796	-4.0532	1.29265	2.62285	6.93368	1.24947	1.25696	0.439064	1.25696
IQSEC2	ENST00000642864.1	0.00174586	0.0390003	-4.04756	1.293	3.8624	6.92105	1.06001	1.44775	0.0849129	1.44775
NA	ENST00000396435.10	0.00174586	0.0390003	-4.04756	1.293	3.8624	6.92105	1.06001	1.44775	0.0849129	1.44775
INVS	ENST00000374921.3	0.00176106	0.039263	-1.26337	0.403913	3.33302	0.59551	0.0570969	0.0887538	0.187622	0.187622
SEC24D	ENST00000511481.5	0.00177043	0.0394334	-1.00567	0.321686	5.49477	0.427592	0.129696	0.0255259	0.0181391	0.0255259
PLEKHG5	ENST00000377728.7	0.00177717	0.0395577	-4.22619	1.35232	2.66814	7.55271	1.98814	0.755004	0.418108	0.755004
MTHFD2L	ENST00000461101.1	0.00178378	0.0396534	-0.752555	0.240891	4.0628	0.184035	0.023221	-0.00555495	0.0638214	0.0638214
PDGFB	ENST00000381551.8	0.00180547	0.0400056	-2.91516	0.934197	2.0589	3.36626	0.549037	0.471988	0.760048	0.760048
SLC29A1	ENST00000371724.6	0.00181927	0.0402592	-4.32619	1.38738	2.82006	7.92455	2.28979	0.597426	0.353066	0.597426
GNG2	ENST00000556766.5	0.00182181	0.0403024	-0.707936	0.22706	4.86692	0.212219	0.0299945	0.0473397	0.0289013	0.0473397
DTNA	ENST00000315456.10	0.00186439	0.0411247	-3.20183	1.02919	2.68615	4.34659	0.929689	0.659154	0.409974	0.659154
CAPN10	ENST00000494738.5	0.00187066	0.0412365	-0.8083	0.259901	4.10552	0.277063	0.0408601	0.0604625	0.0603634	0.0604625
SOX3	ENST00000370536.4	0.00187723	0.0413414	-0.718136	0.230986	5.54136	0.218741	0.00371091	0.0763211	0.0175712	0.0763211
ERBB2	ENST00000445658.6	0.00189117	0.0415737	-0.704582	0.226786	5.39813	0.210649	0.049074	0.0280739	0.0194624	0.0280739
TCF19	ENST00000383526.4	0.00189143	0.0415737	-4.2664	1.37326	1.44006	5.96424	1.57304	-0.943554	1.25571	1.25571
TCF19	ENST00000416433.2	0.00189143	0.0415737	-4.2664	1.37326	1.44006	5.96424	1.57304	-0.943554	1.25571	1.25571
SNTG2	ENST00000308624.10	0.00192491	0.0420587	-0.926183	0.298617	3.86428	0.274068	0.0490839	-0.0281793	0.0846738	0.0846738
GPR78	ENST00000513120.2	0.00192517	0.0420587	-1.52465	0.491577	3.25409	0.856022	0.153429	0.0448941	0.209043	0.209043
MAML2	ENST00000524717.6	0.00194527	0.0424573	-0.589689	0.190317	5.48251	0.147784	0.0083738	0.0459568	0.0182957	0.0459568
ITPR2	ENST00000451599.6	0.00196322	0.0426857	-1.00864	0.325816	4.76495	0.432595	0.106572	0.0526617	0.0312943	0.0526617
RAB15	ENST00000642625.1	0.00197346	0.0428539	-0.693541	0.224143	5.41537	0.184749	0.0561492	-0.00558746	0.0192107	0.0192107
LOX	ENST00000231004.5	0.00198494	0.0430077	-1.22569	0.396345	3.41189	0.567464	0.0679437	0.0780215	0.16769	0.16769
COL16A1	ENST00000373672.8	0.00198626	0.043009	-0.68267	0.220766	4.34695	0.166344	0.0273179	0.0058473	0.0457885	0.0457885
GPRIN2	ENST00000374317.1	0.00199279	0.0431232	-0.62566	0.202394	4.31359	0.147301	0.0140114	0.0233212	0.0474334	0.0474334
ACER2	ENST00000340967.3	0.00201875	0.0436298	-0.653597	0.211694	5.05181	0.181934	0.00619538	0.0610262	0.0251926	0.0610262
DACT3	ENST00000300875.4	0.00203897	0.0439695	-1.55722	0.504853	3.12945	0.922317	0.136895	0.106655	0.24542	0.24542
SLC45A1	ENST00000289877.8	0.00203848	0.0439695	-2.8114	0.911442	2.1208	3.01151	0.527449	0.272946	0.71864	0.71864
THY1	ENST00000532974.1	0.00205091	0.0441852	-3.52287	1.14277	2.2093	5.29029	0.15202	1.80685	0.662225	1.80685
SMIM10L2B	ENST00000433425.4	0.00207496	0.0446332	-0.73484	0.23864	4.05534	0.20413	0.0209626	0.0317038	0.0644607	0.0644607
HNRNPM	ENST00000597270.1	0.00208102	0.0447074	-0.591602	0.192177	5.16898	0.149316	0.0156029	0.0397952	0.0231306	0.0397952
MED13L	ENST00000648379.1	0.00208864	0.0448287	-4.33136	1.40751	1.47253	6.53396	1.74579	-0.613593	1.22582	1.22582
SPG7	ENST00000646445.1	0.0021129	0.045236	-4.29078	1.39588	1.45224	5.7728	1.67827	-1.3663	1.24445	1.24445
USP9X	ENST00000378308.7	0.00211925	0.0453294	-0.707277	0.230159	9.18145	0.21364	0.00102044	0.0784395	0.00997371	0.0784395
CALD1	ENST00000436461.6	0.00215887	0.0459472	-1.02782	0.335074	5.93636	0.451656	0.0461638	0.122248	0.0140642	0.122248
AIG1	ENST00000367596.5	0.0021627	0.046	-0.845074	0.275544	3.83081	0.227573	0.0248482	-0.00818818	0.0890385	0.0890385
PABPN1	ENST00000556821.5	0.0021772	0.0462653	-3.5662	1.16355	2.21956	5.43994	0.561067	1.4697	0.655901	1.4697
SLC12A8	ENST00000430155.6	0.00217963	0.0463026	-3.79135	1.23714	2.43635	6.14892	0.350171	1.94561	0.532556	1.94561
TRIL	ENST00000539664.2	0.00218544	0.0464117	-1.10609	0.361019	3.863	0.523434	0.0279983	0.167504	0.084836	0.167504
PTPRN	ENST00000462351.5	0.00219243	0.0465311	-2.73364	0.892516	2.29805	3.19774	0.381953	0.812926	0.60904	0.812926
GABARAP	ENST00000571253.1	0.0022222	0.0470318	-1.10226	0.360355	3.48777	0.437486	0.0447696	0.0464752	0.150014	0.150014
RSRP1	ENST00000569495.5	0.00222361	0.047043	-3.36722	1.1009	1.92241	4.52193	0.961244	0.439358	0.856712	0.856712
SALL2	ENST00000613414.4	0.00223	0.0471384	-1.29463	0.42339	5.69545	0.717928	0.16054	0.10835	0.0159613	0.10835
FMN2	ENST00000319653.14	0.00224182	0.0473591	-1.35886	0.444628	3.22704	0.579932	0.0798464	-0.0473705	0.216695	0.216695
ACTN4	ENST00000497637.5	0.00224769	0.0474393	-0.596459	0.195215	4.64106	0.151824	0.0224949	0.0338741	0.0346687	0.0346687
ACTN4	ENST00000635521.1	0.00224769	0.0474393	-0.596459	0.195215	4.64106	0.151824	0.0224949	0.0338741	0.0346687	0.0346687
SBSPON	ENST00000297354.7	0.00225443	0.0475668	-0.81481	0.266758	3.8875	0.231209	0.0249417	0.0151012	0.081798	0.081798
EFHC2	ENST00000420999.2	0.00230192	0.048286	-1.47712	0.484583	3.13474	0.73723	0.108407	-0.0050772	0.243823	0.243823
DUSP6	ENST00000279488.8	0.00230303	0.0482879	-1.90493	0.624958	6.27577	1.55731	0.0106747	0.575185	0.0121444	0.575185
KIF5C	ENST00000464066.5	0.00231481	0.0484673	-3.49124	1.14596	1.05247	3.71287	0.324268	-0.253969	1.64558	1.64558
KIF5C	ENST00000615027.4	0.00231481	0.0484673	-3.49124	1.14596	1.05247	3.71287	0.324268	-0.253969	1.64558	1.64558
VAV3	ENST00000370056.9	0.00231406	0.0484673	-0.590486	0.193815	5.37912	0.129336	0.0365981	-0.00568081	0.0197483	0.0197483
PDGFD	ENST00000302251.9	0.00232095	0.0485662	-3.86078	1.26759	1.23724	5.08852	0.958137	-0.187094	1.45205	1.45205
BTBD9	ENST00000314100.10	0.00233386	0.0487915	-4.59116	1.50822	2.89284	7.12537	3.08731	-2.08512	0.324792	0.324792
HMGCS1	ENST00000507293.1	0.00234205	0.048903	-1.18433	0.389193	5.10762	0.602554	0.0129704	0.214236	0.0241891	0.214236
PPRC1	ENST00000413464.6	0.00235284	0.0490535	-4.25852	1.40007	2.85518	7.79271	1.56558	1.3747	0.33919	1.3747
AL357075.1	ENST00000614906.1	0.00235936	0.0491444	-0.694851	0.228508	4.12855	0.205038	0.0196876	0.0555532	0.0586363	0.0586363
DNM3	ENST00000367733.6	0.00237662	0.0493887	-3.56962	1.17475	1.09166	3.8385	0.466713	-0.446917	1.60334	1.60334
RBM4B	ENST00000531036.2	0.00238509	0.0495147	-0.615939	0.202775	4.37165	0.143301	0.0170454	0.0198133	0.044631	0.044631
P2RY1	ENST00000305097.6	0.00239282	0.0496121	-1.18922	0.39163	7.00142	0.608319	0.00116939	0.228892	0.00925251	0.228892
PTCH1	ENST00000546744.5	0.00239292	0.0496121	-3.75914	1.23796	1.18642	4.46734	0.794942	-0.509941	1.50387	1.50387
GPRC5C	ENST00000652294.1	0.00239737	0.0496493	-0.820333	0.270201	4.39763	0.252125	0.0660469	-0.00324583	0.0434664	0.0434664
RPUSD3	ENST00000433972.1	0.002406	0.0497375	-1.21146	0.399173	3.95567	0.60614	0.164962	0.04235	0.0740467	0.0740467

## Sheet: iPSC v M, M up
ext_gene	target_id	pval	qval	b	se_b	mean_obs	var_obs	tech_var	sigma_sq	smooth_sigma_sq	final_sigma_sq
NKD1	ENST00000268459.6	7.79268e-212	5.33378e-207	3.25827	0.104895	7.23649	3.19811	0.0017699	0.0147345	0.00869665	0.0147345
NKX1-2	ENST00000451024.5	1.87668e-79	6.42256e-75	1.44858	0.076751	7.54495	0.630678	0.000621364	0.000837048	0.0082147	0.0082147
DSP	ENST00000418664.2	5.20865e-63	7.13023e-59	1.50021	0.0895385	7.67185	0.676017	0.00393413	-0.00290326	0.00809157	0.00809157
RBP1	ENST00000619087.4	3.95872e-60	2.70958e-56	2.17809	0.13317	6.06762	1.44451	0.00626228	0.020339	0.0132481	0.020339
SP5	ENST00000375281.3	1.1909e-58	7.41021e-55	6.50147	0.402641	4.98105	12.8753	0.163339	0.0798404	0.0265335	0.0798404
MACROH2A2	ENST00000373255.9	1.45891e-52	6.6571e-49	1.31337	0.0860778	6.87441	0.52637	0.00125477	0.0098593	0.00962808	0.0098593
FST	ENST00000256759.8	2.56139e-52	1.09573e-48	3.29873	0.216721	6.88127	3.32086	0.00705452	0.0633974	0.00960637	0.0633974
TNFRSF19	ENST00000382263.3	9.98949e-44	3.25591e-40	3.38896	0.244384	4.6788	3.50154	0.0560072	0.0140313	0.033578	0.033578
PRTG	ENST00000389286.9	1.09494e-40	2.99776e-37	1.76491	0.132145	5.97502	0.955429	0.00386495	0.0223286	0.0138112	0.0223286
KDM6B	ENST00000254846.9	1.06568e-40	2.99776e-37	1.66504	0.124649	5.70768	0.848209	0.0074571	0.0131678	0.0158488	0.0158488
ADAMTS19	ENST00000274487.9	3.45455e-40	8.7574e-37	1.64239	0.123767	7.5212	0.827614	0.000812899	0.0221644	0.00824247	0.0221644
SALL3	ENST00000537592.6	1.66725e-38	3.80388e-35	1.19909	0.0924057	6.37596	0.440507	0.00114485	0.010312	0.0116634	0.0116634
SALL3	ENST00000614883.4	1.66725e-38	3.80388e-35	1.19909	0.0924057	6.37596	0.440507	0.00114485	0.010312	0.0116634	0.0116634
TMEM132C	ENST00000435159.2	3.08921e-37	6.21895e-34	2.38725	0.187225	4.61673	1.74231	0.0171754	0.0235951	0.0354045	0.0354045
TCHP	ENST00000405876.9	4.10488e-36	7.80452e-33	1.57935	0.12587	5.55688	0.765619	0.00637391	0.0152671	0.0173911	0.0173911
FAM167A	ENST00000284486.9	5.49201e-36	1.01596e-32	3.94868	0.31528	5.36419	4.79691	0.0166739	0.132428	0.019979	0.132428
SP8	ENST00000617581.4	1.62031e-33	2.41095e-30	1.4204	0.117731	5.65739	0.608066	0.0044664	-0.000964864	0.0163245	0.0163245
RBP1	ENST00000232219.6	6.31046e-33	8.99845e-30	2.20914	0.184828	5.68376	1.50508	0.0230553	0.028187	0.0160707	0.028187
CDX2	ENST00000381020.7	1.50138e-32	2.05527e-29	5.49166	0.462256	3.72136	9.17401	0.215327	-0.057195	0.105194	0.105194
FGF18	ENST00000274625.6	7.09651e-32	9.34092e-29	3.23603	0.275417	4.16349	3.2326	0.0372686	0.0765131	0.0561933	0.0765131
ASNS	ENST00000394308.8	9.2684e-32	1.19695e-28	1.29969	0.110829	7.16299	0.521498	0.00764615	0.0107784	0.00885196	0.0107784
SMYD2	ENST00000366957.10	5.14307e-31	6.51893e-28	2.12008	0.183065	5.33102	1.36613	0.0297714	-0.00763637	0.0204979	0.0204979
THBS2	ENST00000366787.7	5.17514e-29	5.90362e-26	1.21378	0.108578	7.35366	0.455811	0.00920175	0.00808868	0.00848207	0.00848207
NOTUM	ENST00000409678.8	6.30282e-29	6.9581e-26	3.16754	0.283795	3.97017	3.04018	0.0482829	-0.0105459	0.0725269	0.0725269
WLS	ENST00000262348.9	7.67571e-29	8.33924e-26	4.15413	0.372775	5.21184	5.22534	0.186027	-0.125662	0.0224145	0.0224145
FOXH1	ENST00000377317.4	1.83833e-27	1.93579e-24	0.832091	0.0766379	7.85047	0.214761	0.000404398	0.00840565	0.00798893	0.00840565
DSP	ENST00000379802.8	3.74e-27	3.87861e-24	1.38838	0.128644	8.58075	0.598135	0.000715167	0.0241088	0.00842632	0.0241088
GRB14	ENST00000488342.5	7.36588e-25	6.7222e-22	1.56022	0.151541	6.12967	0.757844	0.00824964	0.0261972	0.0128992	0.0261972
NA	ENST00000245323.4	1.62446e-24	1.42548e-21	1.24812	0.122133	6.45296	0.484653	0.01107	0.0105705	0.0113048	0.0113048
CRABP2	ENST00000368222.8	2.65323e-24	2.29877e-21	0.784097	0.0770864	7.51332	0.189336	0.000661428	0.00545511	0.00825203	0.00825203
TSPAN18	ENST00000340160.7	3.45164e-24	2.95314e-21	1.16357	0.114682	6.66815	0.421951	0.00286722	0.0168609	0.0103629	0.0168609
FGF8	ENST00000618991.4	2.17284e-23	1.70945e-20	2.08393	0.209129	4.48116	1.33189	0.0255519	0.0107743	0.0400506	0.0400506
GSTO1	ENST00000470554.5	5.50159e-23	4.04905e-20	2.44044	0.247207	4.23179	1.83564	0.0397591	0.0213799	0.0519077	0.0519077
FBXL14	ENST00000339235.4	7.62523e-23	5.55231e-20	1.63763	0.166438	4.79355	0.82949	0.0109602	0.0202137	0.0305922	0.0305922
TSPAN5	ENST00000305798.8	1.49656e-22	1.07825e-19	1.00251	0.102599	6.71645	0.31325	0.00561357	0.00906043	0.0101762	0.0101762
TBXT	ENST00000296946.6	1.5934e-22	1.13606e-19	7.23953	0.741387	2.92662	16.3828	0.00590715	0.818574	0.312303	0.818574
SALL3	ENST00000614625.1	1.66511e-22	1.17495e-19	1.28291	0.131441	5.59864	0.508294	0.00898723	0.00917978	0.0169278	0.0169278
ZIC2	ENST00000376335.8	2.34641e-22	1.6388e-19	0.796201	0.081867	7.96532	0.198224	0.000433342	0.00961996	0.00796587	0.00961996
STOX2	ENST00000308497.9	6.61392e-22	4.4382e-19	1.48688	0.154569	7.51627	0.691918	0.000791969	0.0350456	0.00824843	0.0350456
CDH11	ENST00000566827.5	1.5472e-21	1.01827e-18	1.37905	0.144681	5.23251	0.586283	0.00932395	0.0103591	0.0220748	0.0220748
MBNL3	ENST00000370857.7	3.65489e-21	2.36002e-18	2.15521	0.228256	5.28576	1.456	0.0151329	0.0630184	0.0212148	0.0630184
ID2	ENST00000396290.2	1.88531e-20	1.13195e-17	1.07505	0.115988	6.30156	0.362862	0.00289862	0.0172811	0.0120185	0.0172811
IGFBPL1	ENST00000377694.2	2.45901e-20	1.43854e-17	0.912552	0.0987582	7.58901	0.261529	0.000537952	0.0140918	0.00816714	0.0140918
NTN1	ENST00000173229.7	3.88124e-20	2.2324e-17	1.26526	0.137659	5.5088	0.503008	0.00505206	0.0233729	0.0179636	0.0233729
LAMC1	ENST00000258341.5	4.53812e-20	2.52534e-17	0.75268	0.0820408	9.18271	0.170626	0.000117654	0.000716383	0.00997838	0.00997838
NQO2	ENST00000338130.6	5.53615e-20	3.03142e-17	1.29455	0.141435	5.82243	0.525224	0.0151211	0.0129574	0.0148845	0.0148845
EPOP	ENST00000621654.1	9.71411e-20	5.19447e-17	2.26845	0.249497	3.93159	1.61846	0.0156649	0.0777082	0.076669	0.0777082
EPOP	ENST00000613024.2	9.71411e-20	5.19447e-17	2.26845	0.249497	3.93159	1.61846	0.0156649	0.0777082	0.076669	0.0777082
GAD1	ENST00000493875.5	1.06976e-19	5.67601e-17	5.92158	0.65204	2.26764	10.523	0.01086	-0.00650648	0.626875	0.626875
F2RL1	ENST00000296677.5	1.4501e-19	7.63488e-17	1.36979	0.151384	7.52347	0.590402	0.000703975	0.0336719	0.00823975	0.0336719
TRIM36	ENST00000514154.1	3.13108e-19	1.59933e-16	1.32589	0.147912	5.6956	0.553646	0.00926832	0.0235488	0.0159598	0.0235488
GAD1	ENST00000344257.9	1.48312e-18	6.95297e-16	5.83429	0.663671	2.224	10.2248	0.00750592	0.00884832	0.653182	0.653182
RHOBTB3	ENST00000379982.8	1.67761e-18	7.81127e-16	0.968217	0.110312	5.93505	0.289514	0.00418011	0.00617152	0.0140729	0.0140729
ALDH3A2	ENST00000579855.5	1.68911e-18	7.81166e-16	1.32304	0.150751	7.37054	0.550369	0.0256345	0.00591292	0.0084544	0.0084544
SEMA3C	ENST00000419255.6	2.42998e-18	1.11626e-15	3.89554	0.445954	4.62155	4.64915	0.263056	-0.142343	0.0352566	0.0352566
SEMA3C	ENST00000265361.8	4.9012e-18	2.20767e-15	3.17834	0.367198	5.16974	3.19235	0.0268914	0.17536	0.0231178	0.17536
EOMES	ENST00000461503.2	7.28722e-18	3.26001e-15	5.46531	0.634741	4.50609	9.44435	0.279901	0.324443	0.0391195	0.324443
PSMD9	ENST00000537407.5	8.63401e-18	3.83742e-15	0.938088	0.109196	6.10414	0.265458	0.00484541	-0.00302627	0.0130404	0.0130404
BAG2	ENST00000370693.5	9.92022e-18	4.35256e-15	0.759475	0.0885699	6.73923	0.182454	0.00128483	0.0104821	0.0100913	0.0104821
ASNS	ENST00000455086.5	1.04975e-17	4.57649e-15	1.05989	0.123698	7.52962	0.355368	0.0140263	0.00892537	0.00823246	0.00892537
SLC7A5	ENST00000261622.5	2.07394e-17	8.65565e-15	0.937563	0.110437	9.14592	0.278343	0.000924276	0.0173702	0.0098455	0.0173702
SKOR1	ENST00000554054.5	2.16944e-17	8.99937e-15	5.74885	0.677584	2.18181	10.0071	0.00928813	0.106064	0.679392	0.679392
TMEM123	ENST00000398136.7	2.92727e-17	1.19976e-14	0.722033	0.0854535	7.73568	0.165162	0.000879432	0.010074	0.0080455	0.010074
SNX6	ENST00000652385.1	3.66224e-17	1.49206e-14	0.698825	0.082964	7.43077	0.152065	0.00196234	0.00498478	0.00836219	0.00836219
MAP2K5	ENST00000178640.10	4.0842e-17	1.6444e-14	1.07129	0.127376	6.08722	0.36377	0.00562446	0.0187126	0.0131357	0.0187126
WNT5B	ENST00000397196.7	7.25999e-17	2.82339e-14	5.96394	0.714868	2.28882	10.7419	0.152147	-0.0630542	0.614407	0.614407
CDH1	ENST00000562836.5	1.20695e-16	4.64105e-14	0.727581	0.0878464	7.69677	0.163249	0.00350315	0.00204272	0.00807233	0.00807233
PPP1R2	ENST00000618156.5	1.21887e-16	4.66073e-14	0.688045	0.0830846	7.02403	0.150063	0.0011632	0.00888856	0.00919137	0.00919137
SKAP2	ENST00000345317.7	1.34461e-16	5.11297e-14	1.15644	0.139843	5.28229	0.414461	0.00806396	0.00850256	0.0212703	0.0212703
PLIN2	ENST00000276914.7	1.37214e-16	5.18883e-14	0.881414	0.106617	6.70607	0.246708	0.00147455	0.0155761	0.0102155	0.0155761
GSTT2B	ENST00000290765.8	1.49951e-16	5.63931e-14	1.37367	0.166374	4.98258	0.59931	0.0145303	0.0269901	0.0265036	0.0269901
ODC1	ENST00000405333.5	1.64804e-16	6.06463e-14	1.81759	0.220441	6.41566	1.04941	0.0122747	0.0606168	0.0114777	0.0606168
PCSK1	ENST00000311106.8	1.94303e-16	7.03666e-14	2.48025	0.30153	5.84895	1.95459	0.00947731	0.126903	0.0146826	0.126903
CTSB	ENST00000353047.11	2.21121e-16	7.96573e-14	0.886599	0.10799	6.17415	0.241555	0.00483196	0.00233941	0.0126607	0.0126607
CDX1	ENST00000231656.12	2.4903e-16	8.92416e-14	5.67321	0.692213	2.14346	9.8085	0.0148559	0.176289	0.703882	0.703882
ADAMTS16	ENST00000274181.7	3.11194e-16	1.09231e-13	0.999947	0.122409	5.88414	0.311745	0.0080506	0.00667018	0.0144253	0.0144253
ZNF518B	ENST00000326756.4	5.61954e-16	1.96242e-13	0.873798	0.107912	6.75392	0.243031	0.00122472	0.0162429	0.0100376	0.0162429
GOT1	ENST00000370508.7	6.03819e-16	2.09792e-13	0.676044	0.0835804	7.38955	0.145493	0.000750679	0.00972784	0.0084242	0.00972784
SMARCA2	ENST00000382203.5	7.71639e-16	2.64078e-13	5.94137	0.737269	2.27754	10.6552	0.194323	-0.112809	0.621026	0.621026
FAM53B	ENST00000337318.8	8.36104e-16	2.83307e-13	0.744079	0.092446	6.46642	0.176352	0.00156166	0.0112577	0.0112426	0.0112577
ROR2	ENST00000375708.4	8.47456e-16	2.85739e-13	0.820933	0.102015	6.38262	0.20545	0.00397861	0.00011003	0.0116321	0.0116321
GAD1	ENST00000358196.8	1.03697e-15	3.47922e-13	3.77097	0.470055	4.06897	4.29501	0.268126	-0.231941	0.0633013	0.0633013
CCND1	ENST00000227507.2	1.32263e-15	4.39459e-13	1.34349	0.168095	8.1688	0.575397	0.000338967	0.0420447	0.00800742	0.0420447
RAI1	ENST00000353383.6	1.37242e-15	4.53801e-13	1.4947	0.18712	4.60418	0.674246	0.0167263	-0.0117191	0.0357948	0.0357948
FOXB1	ENST00000396057.6	1.41508e-15	4.65656e-13	3.09054	0.387085	5.96107	3.04523	0.00546767	0.219284	0.0139012	0.219284
SLC7A5	ENST00000565644.5	1.42628e-15	4.67096e-13	1.00041	0.125315	8.80247	0.319092	0.0016932	0.0218626	0.00885436	0.0218626
ODC1	ENST00000234111.9	1.60502e-15	5.21689e-13	1.61154	0.202237	6.63563	0.828202	0.00701477	0.054335	0.010494	0.054335
WNT10B	ENST00000301061.9	2.13548e-15	6.73571e-13	5.57867	0.703204	2.09619	9.50005	0.00682976	0.19765	0.734915	0.734915
GBX2	ENST00000306318.5	2.20723e-15	6.9301e-13	4.52811	0.571074	4.82072	6.54248	0.0692981	0.41989	0.0299484	0.41989
LEF1	ENST00000379951.6	2.30024e-15	7.18913e-13	5.99302	0.756314	2.35784	10.9387	0.282869	-0.0780249	0.575147	0.575147
P3H2	ENST00000427335.6	2.51212e-15	7.7803e-13	1.83769	0.232236	6.21791	1.07785	0.0107104	0.0701902	0.012434	0.0701902
RPL37	ENST00000274242.10	3.22825e-15	9.90856e-13	0.812494	0.103086	8.11875	0.210796	0.000324556	0.0156154	0.00798737	0.0156154
PPIA	ENST00000489459.5	3.26815e-15	9.98624e-13	0.966584	0.12266	7.03259	0.29834	0.00727033	0.0152977	0.00916869	0.0152977
NCOA4	ENST00000585132.5	3.36113e-15	1.02247e-12	0.883019	0.112105	7.52362	0.244842	0.0106117	0.00304565	0.00823958	0.00823958
KCNG1	ENST00000371571.5	4.68439e-15	1.41043e-12	1.36341	0.174013	4.82261	0.565841	0.0155165	-0.00530136	0.0299044	0.0299044
SLC35F1	ENST00000621341.1	4.69828e-15	1.41043e-12	1.18447	0.151181	6.06411	0.448315	0.0104154	0.0238682	0.0132685	0.0238682
C9orf85	ENST00000334731.7	4.72003e-15	1.41077e-12	1.05282	0.134389	5.39616	0.348433	0.00759882	0.0122799	0.0194916	0.0194916
ALDH3A2	ENST00000582991.5	7.58141e-15	2.20816e-12	1.28168	0.164859	6.30182	0.525425	0.00840833	0.0323595	0.0120172	0.0323595
ZNF385C	ENST00000461831.1	9.20098e-15	2.64265e-12	1.45016	0.187122	4.82817	0.672909	0.0219548	0.030567	0.0297756	0.030567
CDH1	ENST00000261769.10	1.04623e-14	2.97139e-12	0.62443	0.0807434	8.97612	0.118311	0.000477554	0.0011937	0.0093017	0.0093017
AXIN2	ENST00000307078.10	1.28615e-14	3.60787e-12	2.03557	0.264113	7.10959	1.32677	0.0154306	0.0892032	0.00897516	0.0892032
EFEMP1	ENST00000355426.8	1.46352e-14	4.03918e-12	1.90977	0.248322	6.18212	1.16816	0.013832	0.0786637	0.0126189	0.0786637
WNT5B	ENST00000310594.7	1.5476e-14	4.2541e-12	3.91708	0.509802	4.65064	4.91493	0.157406	0.23244	0.0343862	0.23244
EFEMP1	ENST00000634374.1	1.56802e-14	4.29298e-12	1.91725	0.249581	5.2824	1.1775	0.0235147	0.0699214	0.0212685	0.0699214
LMO7	ENST00000526202.5	1.57828e-14	4.30387e-12	1.04045	0.135457	6.26018	0.346777	0.00725568	0.0202672	0.0122214	0.0202672
CDX1	ENST00000616154.1	1.85268e-14	4.97288e-12	5.29803	0.691607	2.30149	8.69585	0.110436	0.233461	0.607045	0.607045
SLC1A5	ENST00000594991.5	2.63945e-14	6.97529e-12	1.5487	0.203379	5.90851	0.769181	0.028422	0.0336224	0.0142539	0.0336224
CDX2	ENST00000548877.1	3.1999e-14	8.39158e-12	5.06857	0.667799	2.34502	8.04325	0.086655	0.333494	0.582278	0.582278
NODAL	ENST00000287139.7	4.62487e-14	1.19454e-11	2.2334	0.296125	7.4155	1.60166	0.0020158	0.129519	0.00838461	0.129519
SNX9	ENST00000392185.7	5.33151e-14	1.37188e-11	0.657288	0.0873643	7.45959	0.138767	0.000553936	0.0108948	0.00832162	0.0108948
EVX1	ENST00000496902.7	5.44421e-14	1.39564e-11	6.50573	0.865031	2.55972	13.5953	0.00409855	1.11832	0.469437	1.11832
RET	ENST00000355710.8	5.84837e-14	1.49365e-11	1.34403	0.178932	5.58666	0.580346	0.0119921	0.0360326	0.0170577	0.0360326
SYPL2	ENST00000369872.4	6.23966e-14	1.58178e-11	1.29234	0.172244	4.96026	0.536641	0.00871579	0.035786	0.0269444	0.035786
CNIH3	ENST00000272133.4	6.66897e-14	1.68437e-11	1.58033	0.210873	5.77546	0.80259	0.00424625	0.0624546	0.0152605	0.0624546
DMD	ENST00000378723.7	9.87236e-14	2.43944e-11	0.956657	0.128538	5.59306	0.282614	0.00779499	0.00227536	0.0169881	0.0169881
TBC1D5	ENST00000253692.11	1.31077e-13	3.18146e-11	0.628997	0.0849414	7.2407	0.127349	0.00110345	0.00971911	0.00868825	0.00971911
NEFL	ENST00000610854.1	2.1257e-13	5.08727e-11	0.894301	0.121829	6.55709	0.257743	0.00670569	0.0155576	0.0108287	0.0155576
TUBB2A	ENST00000489942.1	2.16312e-13	5.14086e-11	1.55211	0.211508	4.90115	0.776398	0.0293278	0.0377757	0.0281607	0.0377757
IQCB1	ENST00000310864.11	2.2807e-13	5.40155e-11	0.612594	0.0835596	7.26128	0.120552	0.0018254	0.00813758	0.00864791	0.00864791
SOD2	ENST00000546260.5	2.8294e-13	6.6096e-11	0.593339	0.081254	7.32206	0.113048	0.00136728	0.00792305	0.00853603	0.00853603
ASNS	ENST00000444334.5	2.87838e-13	6.70115e-11	1.0482	0.14359	7.19313	0.3408	0.0221409	-0.00816423	0.0087863	0.0087863
TMEM209	ENST00000397622.7	3.01907e-13	6.99817e-11	0.782447	0.107279	6.43387	0.197478	0.00502373	0.0122396	0.0113931	0.0122396
CCDC170	ENST00000239374.8	4.90574e-13	1.11554e-10	2.30625	0.319076	3.73814	1.61249	0.0501903	-0.0291185	0.102524	0.102524
ASS1	ENST00000352480.9	8.47043e-13	1.88849e-10	1.00196	0.14007	7.31395	0.324723	0.00443771	0.0249916	0.00855035	0.0249916
ZFP64	ENST00000371523.8	8.5892e-13	1.90876e-10	1.90571	0.26648	4.76504	1.16724	0.0752253	0.021927	0.0312919	0.0312919
PPP1R16A	ENST00000292539.8	8.81703e-13	1.95304e-10	0.941339	0.131696	5.70848	0.272121	0.0101742	-0.00231762	0.0158416	0.0158416
DUSP10	ENST00000366899.4	9.13887e-13	2.0178e-10	1.2148	0.170071	4.89956	0.46269	0.0151919	0.00976681	0.0281946	0.0281946
EXOC6	ENST00000260762.10	2.90931e-12	6.12709e-10	1.07668	0.154207	5.70291	0.376307	0.0060069	0.0296628	0.0158924	0.0296628
ABHD17B	ENST00000333421.6	2.93064e-12	6.1531e-10	0.611188	0.0875501	7.083	0.121263	0.00117046	0.0103271	0.00903984	0.0103271
RNPS1	ENST00000320225.10	2.97553e-12	6.22823e-10	0.611904	0.0876795	8.09613	0.121553	0.00231899	0.00921254	0.00798042	0.00921254
SMG9	ENST00000601170.5	3.37922e-12	6.96669e-10	0.993644	0.142745	5.4118	0.320291	0.0113018	0.0188135	0.0192623	0.0192623
FOXH1	ENST00000525197.1	3.37771e-12	6.96669e-10	1.06734	0.153331	5.23483	0.36998	0.0114986	0.0237671	0.0220368	0.0237671
ZNF37A	ENST00000351773.7	5.06997e-12	1.01468e-09	0.895946	0.129779	6.39527	0.261027	0.00702579	0.0182383	0.0115728	0.0182383
LETMD1	ENST00000262055.9	5.24991e-12	1.04458e-09	0.896655	0.129975	6.22464	0.256239	0.0129406	0.00586213	0.0123998	0.0123998
PSAT1	ENST00000376588.4	6.53515e-12	1.29279e-09	0.633734	0.0922806	9.45115	0.130705	9.42627e-05	0.0126793	0.0111294	0.0126793
MAOB	ENST00000378069.5	7.46745e-12	1.46873e-09	1.4539	0.212297	4.31759	0.68823	0.0194241	0.048181	0.0472311	0.048181
CCNB1IP1	ENST00000358932.9	7.59874e-12	1.49027e-09	0.71967	0.105124	8.41077	0.168639	0.000436615	0.0161399	0.00819712	0.0161399
MSI1	ENST00000257552.7	7.67566e-12	1.50105e-09	0.631061	0.0922	6.52029	0.123027	0.00175648	0.00268769	0.0109948	0.0109948
SERPINB9	ENST00000380698.5	9.77982e-12	1.90709e-09	1.17385	0.172379	8.6317	0.449035	0.000219857	0.0443519	0.00851131	0.0443519
NCOA6	ENST00000359003.7	1.05319e-11	2.04212e-09	1.1053	0.162568	6.56102	0.398223	0.00299446	0.0366479	0.0108114	0.0366479
APCDD1	ENST00000355285.10	1.14917e-11	2.22192e-09	3.93226	0.579427	2.99387	4.97475	0.214983	0.204958	0.28862	0.28862
TCP1	ENST00000392168.6	1.19013e-11	2.2882e-09	0.620209	0.0914573	8.24289	0.125435	0.00154124	0.0110054	0.00804902	0.0110054
CLDN7	ENST00000360325.11	1.60718e-11	3.03498e-09	0.617638	0.0916665	7.06982	0.118992	0.00353139	0.00215463	0.00907274	0.00907274
RIOK3	ENST00000339486.8	1.60959e-11	3.03498e-09	0.817193	0.121287	6.45437	0.215605	0.0107677	0.00831207	0.0112983	0.0112983
TUBB2A	ENST00000333628.4	2.77292e-11	5.06121e-09	0.858176	0.128891	9.05448	0.240875	0.000186554	0.0247328	0.00953887	0.0247328
MCC	ENST00000302475.8	2.83771e-11	5.1657e-09	1.71825	0.258199	6.66403	0.965714	0.0112146	0.0887853	0.0103793	0.0887853
AC116562.3	ENST00000641316.1	2.95506e-11	5.36503e-09	0.802752	0.120736	5.54458	0.199333	0.00433247	0.00317998	0.0175335	0.0175335
GATA4	ENST00000647274.1	3.46102e-11	6.18519e-09	5.2419	0.791171	1.9278	8.57248	0.0861708	0.325379	0.852757	0.852757
TRIM13	ENST00000457662.2	3.61323e-11	6.40703e-09	0.713929	0.107859	5.97512	0.16201	0.00363964	0.00773757	0.0138106	0.0138106
WLS	ENST00000354777.6	3.86325e-11	6.83267e-09	4.98399	0.754095	2.41919	8.02139	0.311276	0.400427	0.541713	0.541713
NAA30	ENST00000556492.6	4.45119e-11	7.77209e-09	0.736533	0.111795	6.78469	0.177742	0.00201619	0.0167311	0.00992792	0.0167311
TXNL4B	ENST00000268483.8	5.13538e-11	8.83157e-09	0.812339	0.123701	5.59001	0.206881	0.00593174	0.00520897	0.0170211	0.0170211
BBS9	ENST00000434373.3	5.51408e-11	9.36517e-09	1.33732	0.203973	6.30107	0.586454	0.00444138	0.0579663	0.0120209	0.0579663
TMTC1	ENST00000539277.6	5.56833e-11	9.43391e-09	1.18913	0.181411	6.44754	0.463699	0.0320734	0.0172914	0.0113298	0.0172914
MRPS5	ENST00000345084.9	5.61881e-11	9.49593e-09	0.630532	0.0962124	6.50385	0.126096	0.00281491	0.00571563	0.0110703	0.0110703
DHRS7	ENST00000536410.6	6.16425e-11	1.03665e-08	0.685255	0.104784	6.16538	0.148194	0.00376242	0.00538896	0.0127071	0.0127071
GPR50	ENST00000218316.3	6.15585e-11	1.03665e-08	1.40482	0.214808	4.232	0.630609	0.0173176	0.0308731	0.0518958	0.0518958
FOXA2	ENST00000419308.6	6.41093e-11	1.0755e-08	5.20504	0.79663	1.90938	8.63365	0.0856248	0.546771	0.866303	0.866303
TRIM36	ENST00000513154.5	6.44199e-11	1.07807e-08	1.01876	0.155938	5.77588	0.319709	0.0212179	-0.0107825	0.015257	0.015257
CTDSP1	ENST00000273062.6	6.7272e-11	1.11489e-08	0.66223	0.101466	6.12469	0.132848	0.00251656	-0.000911789	0.0129265	0.0129265
OGDHL	ENST00000374103.9	9.64975e-11	1.56143e-08	0.955324	0.147601	6.13469	0.282915	0.0198072	-0.00840463	0.0128719	0.0128719
GBX2	ENST00000465889.1	9.84758e-11	1.58969e-08	5.21315	0.805833	1.91343	8.29982	0.110735	0.07269	0.863314	0.863314
FST	ENST00000504226.5	9.96472e-11	1.60481e-08	3.50141	0.541386	4.86426	4.02967	0.294417	0.145231	0.0289601	0.145231
NEK9	ENST00000557026.5	1.17096e-10	1.86389e-08	0.937122	0.145447	6.39618	0.288845	0.0105616	0.0211706	0.0115685	0.0211706
DACT1	ENST00000395153.7	1.18021e-10	1.87426e-08	0.736626	0.11435	6.90829	0.178476	0.00100284	0.018611	0.00952244	0.018611
STIM1	ENST00000300737.8	1.22191e-10	1.936e-08	0.632727	0.0983017	6.36374	0.127705	0.00277382	0.00672803	0.011721	0.011721
NEBL	ENST00000417816.2	1.34576e-10	2.11752e-08	0.694062	0.108077	5.91783	0.151999	0.00333138	0.00602138	0.0141897	0.0141897
WSCD1	ENST00000574946.5	1.39291e-10	2.18668e-08	6.14521	0.957695	2.37946	11.3849	0.812532	-0.742729	0.563239	0.563239
HAUS2	ENST00000260372.8	1.59633e-10	2.4776e-08	0.701797	0.109727	6.63442	0.162204	0.00344443	0.0146154	0.010499	0.0146154
SERAC1	ENST00000647468.2	1.69528e-10	2.62523e-08	0.916255	0.143464	5.56889	0.27417	0.0136178	0.0142731	0.0172548	0.0172548
GAD1	ENST00000625689.2	2.00241e-10	3.07302e-08	5.21886	0.820426	1.91628	8.17172	0.148437	-0.147477	0.861212	0.861212
CAMK2D	ENST00000394524.7	2.12761e-10	3.25059e-08	0.995188	0.156677	5.85416	0.326577	0.0155048	0.0213169	0.0146437	0.0213169
LMO7	ENST00000377499.9	2.204e-10	3.35234e-08	1.37034	0.215924	5.52376	0.619297	0.0242	0.0457346	0.0177808	0.0457346
RPL13A	ENST00000624069.3	2.32256e-10	3.52483e-08	0.756393	0.119336	6.56476	0.185604	0.0105668	0.00688975	0.0107949	0.0107949
NKD1	ENST00000566396.1	2.34344e-10	3.54082e-08	5.19989	0.820566	2.25388	8.35623	0.374913	-0.0692003	0.635079	0.635079
LSM14B	ENST00000361670.3	2.57899e-10	3.86262e-08	1.13509	0.179541	5.05485	0.399192	0.0232158	-0.00738778	0.0251367	0.0251367
SLC35F1	ENST00000360388.9	2.64939e-10	3.95077e-08	1.67229	0.264685	5.4441	0.923033	0.0408414	0.0642462	0.0188069	0.0642462
ZYG11A	ENST00000371528.1	2.66423e-10	3.95915e-08	0.796087	0.12602	5.45125	0.202683	0.00511218	0.0105839	0.0187094	0.0187094
ARL4C	ENST00000390645.2	2.87583e-10	4.2331e-08	0.633888	0.100532	6.24029	0.125528	0.00283925	0.00339034	0.0123208	0.0123208
LEF1	ENST00000438313.6	3.74949e-10	5.41429e-08	4.91237	0.784208	2.53169	7.97739	0.270021	0.652452	0.483347	0.652452
IFT172	ENST00000260570.8	4.08567e-10	5.83816e-08	0.786936	0.125895	5.87693	0.195117	0.00929731	0.00237358	0.0144771	0.0144771
TBXT	ENST00000366871.7	4.34737e-10	6.18628e-08	5.85394	0.937979	2.85576	11.3364	0.0845728	1.23513	0.338966	1.23513
SPDYE3	ENST00000380765.2	5.76565e-10	8.03739e-08	0.900026	0.145243	5.09668	0.246819	0.00726074	-0.0025048	0.0243824	0.0243824
SLC9B2	ENST00000394785.8	5.8162e-10	8.09137e-08	1.05632	0.170503	4.86746	0.34819	0.0147175	0.0020896	0.0288893	0.0288893
HOXA1	ENST00000643460.1	5.99677e-10	8.32566e-08	5.02803	0.812215	1.82087	7.59128	0.0565269	-0.0478287	0.933012	0.933012
THSD4	ENST00000355327.7	6.44828e-10	8.89837e-08	0.701442	0.113519	5.79593	0.162138	0.00423627	0.0139283	0.0150936	0.0150936
WNT5B	ENST00000543563.1	7.23122e-10	9.93871e-08	4.18455	0.679205	2.42867	5.67912	0.155338	0.377151	0.536642	0.536642
YJEFN3	ENST00000458210.7	8.37193e-10	1.14148e-07	1.03182	0.168111	5.08899	0.353308	0.00698879	0.0354032	0.0245193	0.0354032
F8	ENST00000360256.9	9.62443e-10	1.30446e-07	1.0488	0.171499	4.80336	0.349289	0.0137605	0.0103551	0.0303572	0.0303572
ABITRAM	ENST00000322940.11	9.83527e-10	1.33041e-07	0.651201	0.106544	5.91579	0.136208	0.00282367	0.00841251	0.0142036	0.0142036
TBXT	ENST00000366876.6	1.06891e-09	1.43738e-07	6.25247	1.0252	3.14615	12.9893	0.0976245	1.47894	0.240391	1.47894
SETD4	ENST00000332131.8	1.10398e-09	1.47584e-07	1.10562	0.18144	5.52233	0.406226	0.0239429	0.0254378	0.0177981	0.0254378
RET	ENST00000340058.5	1.11994e-09	1.49426e-07	1.07895	0.17713	5.14363	0.386893	0.0133843	0.0336783	0.0235627	0.0336783
UBA2	ENST00000590048.6	1.1801e-09	1.56841e-07	0.869882	0.143004	5.93535	0.240579	0.0166042	0.000359283	0.0140709	0.0140709
TMEM101	ENST00000206380.8	1.26637e-09	1.66689e-07	0.714653	0.117704	5.76789	0.169844	0.00351351	0.0172679	0.0153234	0.0172679
GATA4	ENST00000335135.8	1.32522e-09	1.73766e-07	5.00666	0.825594	1.81018	7.797	0.0811683	0.265109	0.941239	0.941239
PDK1	ENST00000282077.7	1.41643e-09	1.84313e-07	1.39503	0.230447	7.24341	0.647562	0.00128285	0.0783758	0.00868286	0.0783758
ORC5	ENST00000297431.9	1.65608e-09	2.13888e-07	0.664889	0.110293	6.29049	0.147221	0.00194071	0.0163061	0.0120723	0.0163061
SLC35G1	ENST00000483386.5	1.66382e-09	2.14466e-07	1.01641	0.168626	4.79325	0.341571	0.0120525	0.0274996	0.0305995	0.0305995
NEBL	ENST00000377122.8	1.7264e-09	2.22115e-07	0.600459	0.0997166	6.55724	0.120098	0.00177986	0.0131352	0.0108281	0.0131352
TCF7	ENST00000522653.5	1.88808e-09	2.42007e-07	1.62545	0.270585	4.21208	0.810686	0.0567353	-0.0341582	0.0530894	0.0530894
IDH3A	ENST00000558535.1	2.05325e-09	2.6122e-07	0.591971	0.0987682	6.46014	0.110735	0.00336111	0.00364668	0.0112716	0.0112716
RPS12	ENST00000484616.2	2.10521e-09	2.65855e-07	0.675922	0.112852	6.04503	0.148355	0.00572285	0.00839384	0.0133804	0.0133804
KLHDC4	ENST00000446344.3	2.30333e-09	2.89272e-07	0.896676	0.150076	5.57515	0.268236	0.00639097	0.0273931	0.0171848	0.0273931
EOMES	ENST00000295743.8	2.31245e-09	2.89887e-07	6.3743	1.06697	4.38099	13.5556	0.330125	1.37753	0.0442063	1.37753
TMTC1	ENST00000551659.5	2.5722e-09	3.19523e-07	1.04514	0.175453	6.21055	0.364635	0.00946868	0.0367069	0.0124717	0.0367069
ABHD17B	ENST00000377041.6	2.60776e-09	3.22186e-07	0.609919	0.102429	6.31798	0.122495	0.00379838	0.00981972	0.0119391	0.0119391
SH3KBP1	ENST00000379698.8	2.82475e-09	3.47115e-07	0.691968	0.116464	6.21905	0.159922	0.00457981	0.015766	0.0124282	0.015766
FZD10	ENST00000229030.4	4.10212e-09	4.90006e-07	2.84368	0.483617	3.00748	2.60755	0.0668139	0.160187	0.284014	0.284014
RNF43	ENST00000407977.6	4.3101e-09	5.1306e-07	2.2323	0.380171	4.07632	1.66839	0.135092	0.0817031	0.0626902	0.0817031
HES2	ENST00000377834.8	4.64886e-09	5.49561e-07	1.75544	0.299601	3.77275	0.953244	0.0373998	-0.00143709	0.097241	0.097241
AXIN2	ENST00000585045.1	4.69353e-09	5.53885e-07	2.4367	0.415983	3.56104	1.91679	0.125168	0.0442536	0.134395	0.134395
SOX14	ENST00000306087.2	4.758e-09	5.60527e-07	2.55341	0.436076	3.53179	2.18417	0.079166	0.206078	0.140459	0.206078
ZDHHC14	ENST00000414563.6	5.84897e-09	6.79692e-07	2.0302	0.348771	3.88847	1.25838	0.100781	-0.0734488	0.0816807	0.0816807
NIPA1	ENST00000337435.9	5.93225e-09	6.88201e-07	1.06366	0.182802	6.77585	0.379515	0.00224827	0.0478769	0.00995906	0.0478769
CNTFR	ENST00000378980.8	6.01378e-09	6.96479e-07	5.32261	0.915107	1.96816	8.56354	0.432613	-0.351992	0.823519	0.823519
AXIN2	ENST00000580513.1	7.68008e-09	8.76118e-07	1.51121	0.261667	4.01723	0.726366	0.0348124	0.0167353	0.0678916	0.0678916
RPL12	ENST00000497825.5	9.29327e-09	1.05138e-06	0.878412	0.15295	6.00112	0.259555	0.00615915	0.0289312	0.0136467	0.0289312
NARS1	ENST00000586807.5	9.31947e-09	1.05261e-06	0.588985	0.102563	7.28607	0.116694	0.00577844	0.0100003	0.00860099	0.0100003
MLLT6	ENST00000621332.4	1.04939e-08	1.17556e-06	1.20494	0.210561	5.13692	0.48877	0.00365575	0.0628481	0.0236782	0.0628481
MLLT6	ENST00000618876.2	1.04939e-08	1.17556e-06	1.20494	0.210561	5.13692	0.48877	0.00365575	0.0628481	0.0236782	0.0628481
FST	ENST00000491717.1	1.08447e-08	1.21287e-06	4.50661	0.788288	2.18641	6.62653	0.255598	0.41148	0.6765	0.6765
SFR1	ENST00000369727.3	1.17295e-08	1.29699e-06	0.984222	0.172561	5.16272	0.310881	0.0214295	0.00391138	0.0232366	0.0232366
MACC1	ENST00000400331.9	1.32483e-08	1.45319e-06	0.726829	0.127899	6.4492	0.178114	0.00228376	0.0222535	0.0113222	0.0222535
NXF1	ENST00000531709.6	1.71526e-08	1.83729e-06	0.723061	0.128236	5.59699	0.164969	0.00772117	0.00243355	0.0169456	0.0169456
RPL7P20	ENST00000520308.1	1.72441e-08	1.8442e-06	2.14834	0.381074	3.50089	1.51184	0.0707136	0.0883201	0.147112	0.147112
BMI1	ENST00000376663.8	1.79782e-08	1.91374e-06	0.852608	0.151429	5.08331	0.239548	0.00977531	0.017057	0.0246208	0.0246208
MNS1	ENST00000260453.4	1.80798e-08	1.91889e-06	0.667795	0.118626	5.59655	0.147723	0.00415764	0.0132645	0.0169504	0.0169504
SLCO2A1	ENST00000310926.9	1.92e-08	2.02802e-06	1.44115	0.256475	4.01813	0.697413	0.030862	0.062064	0.067807	0.067807
HS1BP3	ENST00000304031.8	2.00878e-08	2.11527e-06	0.650055	0.115849	5.69495	0.128991	0.00416542	-0.00139112	0.0159659	0.0159659
CA2	ENST00000285379.10	2.08525e-08	2.19243e-06	0.656076	0.117057	5.73173	0.145573	0.00421225	0.0163411	0.0156335	0.0163411
SNRNP70	ENST00000401730.5	2.19807e-08	2.3075e-06	1.45699	0.26038	4.75913	0.718205	0.0306209	0.0710755	0.0314402	0.0710755
KCNB1	ENST00000636838.1	2.32209e-08	2.43396e-06	0.80112	0.143413	5.16672	0.216408	0.00768202	0.0221561	0.0231688	0.0231688
RREB1	ENST00000379938.7	2.42324e-08	2.52452e-06	0.668005	0.119742	6.91842	0.151075	0.00427599	0.0172313	0.00949162	0.0172313
ZNRF3	ENST00000544604.6	2.8233e-08	2.91468e-06	0.617315	0.111187	5.96241	0.124398	0.00465126	0.00794247	0.0138925	0.0138925
EPB41L5	ENST00000443124.5	3.08541e-08	3.1757e-06	0.865409	0.156309	6.36652	0.253999	0.00392584	0.032723	0.0117079	0.032723
UBE2D2	ENST00000505007.5	3.28004e-08	3.3659e-06	1.10817	0.200545	4.81059	0.392501	0.0301414	-2.91329e-05	0.0301859	0.0301859
CD1D	ENST00000368171.3	3.35888e-08	3.4365e-06	1.62122	0.293612	4.62273	0.891951	0.0124399	0.116872	0.0352205	0.116872
SPAG9	ENST00000510283.5	3.398e-08	3.47133e-06	1.08637	0.196822	5.63453	0.369062	0.0415552	-0.022806	0.0165529	0.0165529
NTPCR	ENST00000366628.10	3.99025e-08	4.01052e-06	0.65542	0.119356	5.63928	0.132802	0.00486414	4.7121e-05	0.0165048	0.0165048
ZNF516	ENST00000443185.7	4.11171e-08	4.10847e-06	1.07725	0.196364	6.61417	0.394411	0.00199229	0.055846	0.0105829	0.055846
MSI2	ENST00000284073.7	4.2741e-08	4.2583e-06	0.75493	0.137783	7.51552	0.193757	0.000667189	0.0278089	0.00824935	0.0278089
LDB2	ENST00000441778.6	4.27216e-08	4.2583e-06	0.824381	0.150456	5.97198	0.231046	0.0187506	0.0152049	0.0138307	0.0152049
PDK1	ENST00000410055.5	4.32917e-08	4.29961e-06	1.4166	0.258651	7.02609	0.682304	0.00230972	0.0980406	0.0091859	0.0980406
TUBB2B	ENST00000259818.8	4.41021e-08	4.36847e-06	0.772466	0.141126	9.95616	0.202911	6.71095e-05	0.0298078	0.014367	0.0298078
NDUFS4	ENST00000506974.5	4.68959e-08	4.61183e-06	1.21351	0.222146	4.45659	0.489263	0.0330168	0.0263307	0.0410062	0.0410062
FGF19	ENST00000294312.4	5.05875e-08	4.93939e-06	0.855588	0.157011	6.23937	0.249192	0.00185082	0.0351277	0.0123254	0.0351277
SLC41A3	ENST00000360370.8	5.35574e-08	5.1997e-06	0.611739	0.112471	5.93915	0.127447	0.00432722	0.0146474	0.0140455	0.0146474
PARP12	ENST00000488726.5	5.37926e-08	5.20776e-06	1.52091	0.279667	4.61265	0.741089	0.0817897	-0.0228668	0.0355305	0.0355305
SNRNP70	ENST00000544278.2	5.74633e-08	5.53183e-06	1.07547	0.198187	5.00047	0.394122	0.0119257	0.0469915	0.026157	0.0469915
ASNS	ENST00000175506.8	5.99192e-08	5.71998e-06	0.778807	0.143717	6.40093	0.206747	0.0170714	0.0139104	0.0115463	0.0139104
SLC47A1	ENST00000270570.8	6.95441e-08	6.56554e-06	2.43234	0.451073	4.77083	1.78102	0.274053	-0.266388	0.0311477	0.0311477
WDR60	ENST00000407559.8	7.4892e-08	7.022e-06	0.941943	0.175114	6.14775	0.302975	0.00299794	0.0429996	0.0128013	0.0429996
PPP1R3B	ENST00000310455.4	8.37713e-08	7.79051e-06	0.796636	0.148659	7.87064	0.216908	0.000501564	0.0326478	0.00798246	0.0326478
SIRPA	ENST00000356025.7	9.92176e-08	9.05473e-06	0.935752	0.175624	5.4689	0.299702	0.00885498	0.0374108	0.0184733	0.0374108
KIAA1522	ENST00000401073.7	1.02112e-07	9.30647e-06	1.53624	0.288607	6.44211	0.807959	0.030494	0.0944474	0.0113549	0.0944474
CCNC	ENST00000627680.2	1.04517e-07	9.4943e-06	1.2281	0.230903	4.47702	0.482525	0.0397651	-0.00219408	0.0402089	0.0402089
EDAR	ENST00000258443.7	1.10149e-07	9.94622e-06	3.19836	0.602426	3.39412	3.50435	0.119658	0.424718	0.172046	0.424718
SMARCA2	ENST00000416751.2	1.13145e-07	1.01765e-05	5.4139	1.02067	2.0138	8.87484	0.771475	-0.669285	0.791188	0.791188
SH3RF3	ENST00000309415.7	1.42811e-07	1.25641e-05	1.3654	0.259502	3.95924	0.590236	0.0273443	0.0113357	0.0736678	0.0736678
TNFRSF19	ENST00000248484.8	1.492e-07	1.30757e-05	4.82087	0.917641	1.71729	6.97506	0.248401	-0.244852	1.0147	1.0147
PRKCSH	ENST00000592741.5	1.55348e-07	1.35798e-05	0.592092	0.112863	7.07312	0.109099	0.0100427	-0.00513443	0.00906443	0.00906443
CD44	ENST00000433892.6	1.56879e-07	1.36786e-05	1.0082	0.192247	5.62129	0.34929	0.0189579	0.0364803	0.0166888	0.0364803
CEMIP2	ENST00000377044.9	1.63479e-07	1.4146e-05	0.655856	0.125242	8.15026	0.147867	0.0014233	0.0221052	0.00799924	0.0221052
GREB1L	ENST00000580732.6	1.64002e-07	1.41733e-05	2.53395	0.483937	3.11605	2.15237	0.101812	0.180817	0.249481	0.249481
TNFRSF11B	ENST00000297350.9	1.67268e-07	1.44191e-05	2.00994	0.384129	5.00661	1.38903	0.0147421	0.206591	0.0260393	0.206591
PDK1	ENST00000392571.6	1.72246e-07	1.47817e-05	1.64583	0.314868	5.86884	0.931596	0.01703	0.131683	0.0145358	0.131683
TRPM3	ENST00000377111.6	1.76221e-07	1.5077e-05	1.29163	0.247305	4.51576	0.526432	0.0529712	-0.0205451	0.0387683	0.0387683
SIPA1L2	ENST00000366630.5	1.79968e-07	1.53784e-05	0.786469	0.150696	7.0759	0.212811	0.0225563	0.0115075	0.0090575	0.0115075
BBS1	ENST00000318312.12	1.91383e-07	1.62928e-05	0.593077	0.113889	6.00634	0.107727	0.00584152	-0.00308492	0.0136144	0.0136144
PIK3R1	ENST00000521381.6	2.02158e-07	1.70826e-05	1.02472	0.197163	6.54723	0.361664	0.00346244	0.0548472	0.0108726	0.0548472
P3H2	ENST00000319332.10	2.02409e-07	1.70827e-05	1.60942	0.309675	5.4032	0.892144	0.0371126	0.106735	0.0193876	0.106735
DBNL	ENST00000432854.5	2.05603e-07	1.73309e-05	0.948327	0.182574	4.64008	0.278912	0.0153022	-0.0039087	0.0346977	0.0346977
DKK4	ENST00000220812.3	2.18722e-07	1.83464e-05	5.97425	1.15273	2.29398	12.302	0.00845856	1.98473	0.611405	1.98473
SFXN4	ENST00000355697.6	2.2847e-07	1.91406e-05	0.627635	0.121293	5.68267	0.130349	0.00598693	0.00922718	0.016081	0.016081
TMEM38A	ENST00000187762.7	2.44634e-07	2.02225e-05	0.621321	0.12037	5.55929	0.129508	0.00436976	0.0127505	0.0173636	0.0173636
ABCD1	ENST00000218104.6	2.70994e-07	2.21078e-05	0.861258	0.167476	4.7585	0.22608	0.0106163	-0.00617878	0.031456	0.031456
SLCO4C1	ENST00000310954.7	2.803e-07	2.28126e-05	0.838138	0.163182	6.33593	0.242697	0.00195002	0.0379923	0.0118531	0.0379923
ZBTB10	ENST00000610895.2	2.84547e-07	2.31033e-05	1.51782	0.295676	4.99743	0.746029	0.104921	-0.0363048	0.0262156	0.0262156
JCAD	ENST00000375377.2	2.9374e-07	2.37933e-05	1.39104	0.271295	5.59766	0.668821	0.00442485	0.105977	0.0169384	0.105977
BBS9	ENST00000627264.1	3.00552e-07	2.43163e-05	1.02282	0.199649	4.99472	0.361682	0.00965547	0.0501343	0.0262678	0.0501343
MTHFD1L	ENST00000367307.8	3.02108e-07	2.44133e-05	0.642865	0.125507	5.74849	0.12797	0.00814041	-0.00315591	0.0154878	0.0154878
THBS2	ENST00000617924.4	3.09221e-07	2.48999e-05	1.06336	0.207779	6.44831	0.371499	0.0534317	-0.0130804	0.0113263	0.0113263
HOXA1	ENST00000355633.5	3.11221e-07	2.50316e-05	4.04201	0.789992	2.1926	5.29359	0.263516	0.226786	0.672614	0.672614
RAB25	ENST00000361084.10	3.23349e-07	2.5946e-05	0.771272	0.150955	6.07049	0.205803	0.00446468	0.0297162	0.0132315	0.0297162
CNKSR3	ENST00000479339.5	3.4403e-07	2.74127e-05	1.21193	0.237747	4.39512	0.495302	0.0412089	0.0271236	0.0435767	0.0435767
NBPF12	ENST00000611443.4	3.56431e-07	2.83019e-05	1.18883	0.233522	5.77643	0.466204	0.066546	-0.013782	0.0152524	0.0152524
PCSK1	ENST00000508626.5	4.0572e-07	3.19562e-05	2.52979	0.49934	4.63845	2.21915	0.124424	0.249587	0.0347463	0.249587
DCLK1	ENST00000460982.1	4.12729e-07	3.24336e-05	1.01438	0.200351	5.40443	0.356857	0.00629363	0.0539173	0.0193695	0.0539173
TMEM179B	ENST00000333449.9	4.34282e-07	3.40101e-05	0.632169	0.125101	5.4641	0.134571	0.00493848	0.0134113	0.0185368	0.0185368
GAD1	ENST00000488724.5	4.4767e-07	3.49786e-05	4.5703	0.905462	1.76374	6.32109	0.252293	-0.183806	0.9775	0.9775
APOBEC3F	ENST00000308521.10	4.62703e-07	3.60297e-05	0.762849	0.151324	5.33597	0.20206	0.00519832	0.0291501	0.02042	0.0291501
GABRB2	ENST00000353437.10	4.67578e-07	3.6368e-05	4.71644	0.935958	1.66507	6.67556	0.256422	-0.253784	1.0576	1.0576
SUPT20H	ENST00000475892.5	5.01967e-07	3.89542e-05	0.661653	0.131658	6.28045	0.148934	0.0138791	0.00811895	0.0121215	0.0121215
TAF1D	ENST00000526015.5	5.46018e-07	4.20391e-05	0.737528	0.147229	7.05809	0.189196	0.00207289	0.0304417	0.00910247	0.0304417
SMOX	ENST00000305958.9	5.47843e-07	4.21322e-05	0.86751	0.173199	5.30112	0.237243	0.0240265	-0.00968803	0.0209702	0.0209702
AXIN2	ENST00000618960.4	5.72981e-07	4.39667e-05	1.66404	0.3328	6.27031	0.86128	0.153963	-0.115745	0.0121714	0.0121714
BAG1	ENST00000379707.7	5.98516e-07	4.57721e-05	0.915378	0.18338	4.97982	0.266025	0.0238849	-0.0055725	0.0265575	0.0265575
SMPD3	ENST00000219334.10	6.49121e-07	4.92569e-05	1.16859	0.234845	4.13426	0.462517	0.0245062	0.041539	0.0582223	0.0582223
HPGD	ENST00000296522.11	6.53839e-07	4.956e-05	1.05003	0.211078	4.85818	0.357247	0.0377356	-0.0046351	0.0290951	0.0290951
DERA	ENST00000428559.7	6.70326e-07	5.06974e-05	0.703528	0.141562	5.74104	0.1606	0.0145074	0.000636164	0.0155521	0.0155521
ZSWIM5	ENST00000359600.6	6.84554e-07	5.16593e-05	1.10748	0.223027	4.16759	0.423375	0.0186914	0.0505822	0.0559202	0.0559202
REEP4	ENST00000306306.8	7.05797e-07	5.31452e-05	0.656452	0.132356	5.89821	0.1503	0.00356851	0.0227085	0.0143257	0.0227085
SARS1	ENST00000234677.7	7.10814e-07	5.34055e-05	0.668488	0.13482	8.31641	0.155874	0.000353296	0.0269112	0.00810457	0.0269112
PTK7	ENST00000230419.9	7.52048e-07	5.6195e-05	0.661224	0.13365	8.27294	0.1526	0.00115746	0.0256361	0.00807	0.0256361
NFE2	ENST00000435572.7	8.45189e-07	6.26758e-05	1.54452	0.313632	4.00235	0.794143	0.0782386	0.0198621	0.0693085	0.0693085
FST	ENST00000396947.7	9.005e-07	6.60618e-05	3.54815	0.72231	5.25524	3.91316	0.760892	-0.59044	0.0217052	0.0217052
SOGA1	ENST00000237536.9	9.24516e-07	6.76062e-05	0.594912	0.121236	6.40031	0.123814	0.00182066	0.0202266	0.0115492	0.0202266
LSM11	ENST00000286307.6	9.87133e-07	7.15734e-05	0.600922	0.122783	5.68079	0.126423	0.00368214	0.0189313	0.0160987	0.0189313
ALDH3A2	ENST00000476965.5	1.10457e-06	7.9332e-05	1.24685	0.25592	5.51875	0.544985	0.0313305	0.0669121	0.0178415	0.0669121
AXIN2	ENST00000611991.1	1.1454e-06	8.1835e-05	4.43084	0.910785	1.52227	5.92921	0.0634197	-0.0140345	1.18087	1.18087
EPHA4	ENST00000281821.7	1.14921e-06	8.20215e-05	1.09473	0.225058	5.92125	0.420311	0.0241906	0.0517864	0.0141663	0.0517864
TRABD2A	ENST00000495990.5	1.15504e-06	8.23521e-05	1.29579	0.266447	5.39644	0.588911	0.00565432	0.100837	0.0194875	0.100837
TM9SF2	ENST00000642475.1	1.21426e-06	8.60366e-05	0.629374	0.12968	6.61619	0.139014	0.0105556	0.0146696	0.0105744	0.0146696
ADAMTS19	ENST00000505791.5	1.21585e-06	8.606e-05	1.85175	0.381565	3.59006	1.06732	0.089784	-0.0414986	0.128604	0.128604
BAHCC1	ENST00000307745.8	1.23388e-06	8.68871e-05	5.66484	1.16798	2.13927	9.67822	1.33967	-1.27581	0.706591	0.706591
GNAL	ENST00000334049.11	1.40953e-06	9.83452e-05	0.762105	0.157993	6.90377	0.204195	0.00153729	0.0359056	0.00953628	0.0359056
PRKAB1	ENST00000229328.10	1.49826e-06	0.000103586	0.765066	0.159009	6.0588	0.177342	0.0246263	-0.0224453	0.0132994	0.0132994
KLF5	ENST00000377687.6	1.53957e-06	0.00010612	2.22957	0.463911	4.84288	1.67897	0.293382	-0.0587886	0.029439	0.029439
HMGCL	ENST00000374490.8	1.60538e-06	0.000110434	0.669479	0.139543	5.39246	0.150613	0.00966166	0.0105287	0.0195467	0.0195467
FZD10	ENST00000539839.1	1.61005e-06	0.000110533	2.82252	0.588384	2.57628	2.59245	0.0579556	0.19513	0.461338	0.461338
MYCL	ENST00000372816.3	1.65117e-06	0.000113016	1.09404	0.228305	5.36907	0.400877	0.0582819	-0.00603401	0.0199031	0.0199031
MTHFD2	ENST00000477455.5	1.70186e-06	0.000116022	0.617888	0.129105	5.89984	0.134537	0.0100154	0.0149866	0.0143143	0.0149866
MYO5B	ENST00000324581.10	1.70598e-06	0.000116186	0.590661	0.123428	5.65841	0.114679	0.00653728	0.00598167	0.0163145	0.0163145
CCDC169	ENST00000379864.6	1.9352e-06	0.000129732	0.633408	0.133067	6.30106	0.14161	0.00217004	0.0243901	0.0120209	0.0243901
KLF13	ENST00000621843.1	1.95017e-06	0.000130608	0.697074	0.14649	6.48227	0.171525	0.00902536	0.0231635	0.0111696	0.0231635
C5orf63	ENST00000535381.5	2.06634e-06	0.000137447	0.689679	0.145293	5.28544	0.168029	0.00533995	0.026325	0.0212198	0.026325
GAD1	ENST00000429023.1	2.08025e-06	0.000138237	3.75813	0.791941	2.05593	4.89491	0.178685	0.643631	0.76207	0.76207
CHMP4C	ENST00000297265.5	2.13977e-06	0.000141643	1.08763	0.22947	5.32077	0.41807	0.00527715	0.0737074	0.0206593	0.0737074
ATXN2L	ENST00000340394.12	2.15183e-06	0.000142279	0.673196	0.142066	7.2318	0.160177	0.0145657	0.0157083	0.00870607	0.0157083
NAV2	ENST00000525322.5	2.26423e-06	0.000148874	0.754632	0.1596	5.18252	0.183111	0.0153055	3.20559e-05	0.0229025	0.0229025
CYP1B1	ENST00000610745.5	2.46778e-06	0.000160713	0.783381	0.166296	4.83364	0.195801	0.0118316	0.00278712	0.0296498	0.0296498
RETSAT	ENST00000295802.9	2.53806e-06	0.000164719	0.804257	0.170935	6.72641	0.229111	0.00221073	0.0416174	0.0101388	0.0416174
AKNA	ENST00000374088.7	2.55952e-06	0.000165585	1.1454	0.243531	6.82263	0.464754	0.0158735	0.0730873	0.00979751	0.0730873
RPLP0	ENST00000549098.5	2.71597e-06	0.000174388	1.16655	0.248667	6.41266	0.482455	0.0186796	0.0740736	0.0114917	0.0740736
HERC3	ENST00000402738.6	2.79636e-06	0.000179381	1.68287	0.359185	6.16482	0.883274	0.180811	-0.138737	0.01271	0.01271
B3GNT7	ENST00000287590.6	2.90862e-06	0.000185539	0.848175	0.181344	7.45903	0.255283	0.000591045	0.0487372	0.00832239	0.0487372
ZDHHC14	ENST00000359775.10	2.91517e-06	0.000185567	1.99634	0.426868	3.51584	1.39318	0.129464	0.117505	0.14386	0.14386
NPM3	ENST00000474993.5	3.05706e-06	0.000193029	0.960057	0.205714	5.03127	0.316197	0.0379042	0.011701	0.0255733	0.0255733
TMX2	ENST00000529403.1	3.17459e-06	0.000199713	1.4963	0.321149	5.10258	0.795434	0.112804	0.0419012	0.024278	0.0419012
STOX2	ENST00000506529.1	3.21857e-06	0.00020182	1.57096	0.337379	4.44789	0.876959	0.0820052	0.0887314	0.0413541	0.0887314
DST	ENST00000340834.10	3.28599e-06	0.000205776	1.25046	0.268795	6.259	0.555795	0.0222625	0.0861139	0.0122273	0.0861139
TMEM62	ENST00000260403.7	3.34786e-06	0.000209267	1.0893	0.234347	4.63777	0.39438	0.0476115	0.000396141	0.0347666	0.0347666
STAM2	ENST00000263904.5	3.55881e-06	0.000221241	0.62467	0.134755	6.08224	0.138854	0.00341314	0.0238251	0.013164	0.0238251
SNX25	ENST00000264694.13	3.61606e-06	0.000224393	0.663531	0.14324	6.32051	0.156703	0.00430914	0.0264673	0.011927	0.0264673
NIN	ENST00000530997.6	3.78523e-06	0.000233199	0.800444	0.17315	6.08997	0.211449	0.0318512	-0.00780605	0.0131201	0.0131201
EIF1	ENST00000469257.2	3.8655e-06	0.000237289	0.68634	0.148607	5.79102	0.167819	0.0115117	0.0216144	0.0151332	0.0216144
RGMB	ENST00000308234.11	3.88943e-06	0.000238545	1.42727	0.30912	6.59561	0.725795	0.0305891	0.112743	0.0106613	0.112743
ALK	ENST00000389048.8	4.18631e-06	0.000255608	4.28804	0.931796	1.45087	5.55172	0.0566565	-0.012247	1.24571	1.24571
CEBPG	ENST00000652630.1	4.20618e-06	0.000256592	0.712689	0.154901	6.13366	0.179379	0.0231141	0.0106376	0.0128775	0.0128775
ANKRD11	ENST00000567736.6	4.49954e-06	0.000272063	0.630632	0.137486	6.4139	0.141992	0.00188835	0.0264654	0.0114859	0.0264654
CLK3	ENST00000345005.8	4.72306e-06	0.000284072	0.649596	0.141935	5.85838	0.150767	0.00699614	0.023222	0.0146125	0.023222
H3P6	ENST00000369387.4	5.01006e-06	0.000299492	5.066	1.1099	2.98585	9.15045	1.55646	0.257479	0.291363	0.291363
CDK13	ENST00000642592.1	5.2134e-06	0.000310293	0.838535	0.18405	4.5046	0.234526	0.0116378	0.0178414	0.0391739	0.0391739
TMEM123	ENST00000528969.5	5.36834e-06	0.000318407	0.800893	0.176026	5.81413	0.229611	0.00672716	0.0397506	0.0149492	0.0397506
LMO7	ENST00000465261.6	5.48113e-06	0.000323694	1.05661	0.232454	5.41535	0.399772	0.0225716	0.0584807	0.019211	0.0584807
KIAA1522	ENST00000373481.7	5.64441e-06	0.00033162	0.657115	0.144762	7.47286	0.154687	0.00949291	0.021941	0.0083037	0.021941
EVX1	ENST00000222761.7	5.74737e-06	0.000336514	4.27747	0.943114	1.44559	6.41202	0.0836039	1.07014	1.25059	1.25059
MRPL43	ENST00000318325.6	5.88356e-06	0.000343606	0.799083	0.176377	4.62872	0.22725	0.0116249	0.0329873	0.0350386	0.0350386
GTF2IP12	ENST00000651444.1	5.97641e-06	0.000347841	0.620226	0.136999	5.33842	0.137927	0.00638211	0.0217711	0.0203816	0.0217711
SMYD2	ENST00000460580.5	6.72691e-06	0.000387567	5.61706	1.24764	2.11538	9.68578	1.61271	-1.33726	0.7222	0.7222
TCERG1	ENST00000549332.1	7.08997e-06	0.000405413	5.38887	1.19993	2.56122	9.07258	1.69107	-1.24031	0.468698	0.468698
LIX1	ENST00000274382.9	7.14866e-06	0.000408429	1.92874	0.42964	3.29314	1.2827	0.0786161	0.129734	0.198269	0.198269
KDM6B	ENST00000448097.6	7.25686e-06	0.000414264	4.48083	0.998844	2.47784	7.22057	0.823335	0.6732	0.510792	0.6732
AMN1	ENST00000281471.11	7.44515e-06	0.000423248	0.872505	0.194732	4.62998	0.26908	0.0218801	0.0289951	0.0350006	0.0350006
NA	ENST00000228280.9	7.56053e-06	0.000428739	1.46054	0.326212	4.3547	0.716403	0.114201	-0.0186369	0.0454202	0.0454202
CEP95	ENST00000556440.7	7.77654e-06	0.000440059	0.693749	0.155158	6.73445	0.173275	0.00390899	0.032202	0.010109	0.032202
FBXO17	ENST00000292852.9	7.78587e-06	0.000440059	0.632102	0.141379	5.22297	0.143851	0.00334195	0.0266399	0.0222311	0.0266399
FBXO17	ENST00000634982.2	7.78587e-06	0.000440059	0.632102	0.141379	5.22297	0.143851	0.00334195	0.0266399	0.0222311	0.0266399
MIXL1	ENST00000366810.5	7.82003e-06	0.000441625	4.24904	0.950557	6.45891	6.50058	0.00811481	1.34722	0.0112773	1.34722
SMG9	ENST00000270066.11	7.99213e-06	0.0004506	0.777731	0.174169	4.89838	0.188741	0.0172824	-0.00818023	0.0282196	0.0282196
TTC14	ENST00000382584.8	8.14699e-06	0.0004582	0.73109	0.163874	5.26215	0.192574	0.0116223	0.0286599	0.0215936	0.0286599
GSTT1	ENST00000612885.3	8.27737e-06	0.000464769	0.63497	0.142438	5.37502	0.134106	0.0106216	0.00581565	0.0198111	0.0198111
BVES	ENST00000314641.10	8.55115e-06	0.000477399	0.596816	0.134089	5.28963	0.12719	0.00581669	0.0196003	0.021153	0.021153
MMP2	ENST00000543485.5	8.58e-06	0.00047862	0.760627	0.170921	6.01401	0.208622	0.0171838	0.026637	0.0135672	0.026637
ZFP64	ENST00000395989.7	8.69603e-06	0.000483915	3.58857	0.806912	2.19692	4.24094	0.306743	0.165244	0.669918	0.669918
CCDC3	ENST00000378825.5	8.97245e-06	0.000498077	0.665035	0.149764	5.05631	0.149158	0.00853373	0.0120614	0.02511	0.02511
FNDC3A	ENST00000492622.6	9.08482e-06	0.000503498	0.786285	0.177176	6.5149	0.223143	0.0179473	0.0291396	0.0110195	0.0291396
CEP290	ENST00000552810.6	9.12e-06	0.000505039	0.636726	0.143502	6.3757	0.146337	0.00532641	0.0255629	0.0116646	0.0255629
ASNS	ENST00000454046.5	9.14284e-06	0.000505485	1.41355	0.318617	6.40345	0.655313	0.14074	-0.0708911	0.0115346	0.0115346
BCL2L1	ENST00000422920.1	9.21774e-06	0.000509215	0.94347	0.212745	5.41139	0.321353	0.0105976	0.0572928	0.0192682	0.0572928
LAMC1	ENST00000495918.1	9.85151e-06	0.000537716	1.14123	0.258174	4.89218	0.442729	0.0716285	-0.00662148	0.0283521	0.0283521
ECHDC2	ENST00000539680.1	1.03081e-05	0.000560405	0.638816	0.144836	5.12281	0.136654	0.00754331	0.0102424	0.023923	0.023923
GSTO1	ENST00000539281.5	1.05343e-05	0.000571151	3.44162	0.781137	5.96627	3.68578	0.901396	-0.735943	0.0138675	0.0138675
PCNP	ENST00000460231.5	1.05801e-05	0.000572011	0.59573	0.135241	6.68927	0.128416	0.00976976	0.0176653	0.0102801	0.0176653
PSMD9	ENST00000543699.5	1.05964e-05	0.00057244	0.806428	0.183086	5.06072	0.21855	0.0252515	0.0040636	0.0250295	0.0250295
ZNF664	ENST00000337815.9	1.07266e-05	0.000576743	0.87061	0.197777	6.96504	0.274327	0.0419077	0.0167658	0.00935442	0.0167658
PCCB	ENST00000471595.5	1.13316e-05	0.000604524	0.615976	0.140311	5.36446	0.13582	0.00955616	0.017934	0.0199748	0.0199748
NQO2	ENST00000606474.1	1.13745e-05	0.00060634	1.23874	0.282221	3.82992	0.519256	0.0303148	0.0433296	0.0891582	0.0891582
SNHG32	ENST00000375638.7	1.1456e-05	0.000608316	1.18689	0.270504	5.18517	0.510419	0.00374246	0.106016	0.022858	0.106016
SNHG32	ENST00000433752.6	1.1456e-05	0.000608316	1.18689	0.270504	5.18517	0.510419	0.00374246	0.106016	0.022858	0.106016
SNHG32	ENST00000423640.6	1.1456e-05	0.000608316	1.18689	0.270504	5.18517	0.510419	0.00374246	0.106016	0.022858	0.106016
SNHG32	ENST00000414434.6	1.1456e-05	0.000608316	1.18689	0.270504	5.18517	0.510419	0.00374246	0.106016	0.022858	0.106016
SNHG32	ENST00000383383.6	1.1456e-05	0.000608316	1.18689	0.270504	5.18517	0.510419	0.00374246	0.106016	0.022858	0.106016
ANKRD11	ENST00000301030.10	1.16624e-05	0.000618793	0.589325	0.134432	7.90892	0.11036	0.019135	-0.0114239	0.00797302	0.00797302
PMEPA1	ENST00000341744.8	1.21538e-05	0.000642876	0.986935	0.225595	5.48813	0.353284	0.0401551	0.0361845	0.0182236	0.0361845
TPM1	ENST00000404484.9	1.2881e-05	0.000677675	3.83286	0.878669	2.95422	5.32713	0.855697	0.294172	0.302391	0.302391
F13A1	ENST00000264870.7	1.3063e-05	0.000686191	1.06616	0.244587	4.02366	0.376755	0.0224414	0.0222376	0.0672925	0.0672925
EGFLAM	ENST00000322350.10	1.32067e-05	0.000691617	3.98794	0.915369	2.17916	5.77659	0.421826	0.835024	0.681063	0.835024
ZFAND3	ENST00000287218.9	1.35528e-05	0.00070704	0.744291	0.171063	6.98299	0.201306	0.00422204	0.0396717	0.00930357	0.0396717
RELL1	ENST00000454158.7	1.3719e-05	0.000713533	0.73864	0.169868	5.76668	0.198303	0.0037942	0.0394886	0.0153335	0.0394886
TLL2	ENST00000469598.1	1.40688e-05	0.000730062	1.27047	0.292547	3.93387	0.586929	0.0434747	0.0849011	0.0764161	0.0849011
MACROH2A1	ENST00000304332.8	1.46504e-05	0.0007568	0.661773	0.152698	6.86978	0.159363	0.00362379	0.0313511	0.00964283	0.0313511
SOHLH2	ENST00000379881.8	1.48483e-05	0.000764142	0.81704	0.188652	4.57844	0.234494	0.0167661	0.0260184	0.0366184	0.0366184
PLPP2	ENST00000269812.7	1.48731e-05	0.000764843	4.85189	1.12038	1.7328	7.12696	0.880718	-0.799832	1.00217	1.00217
SLC3A2	ENST00000537508.5	1.48986e-05	0.00076558	0.584993	0.135097	6.17347	0.111192	0.0147123	-0.00405358	0.0126643	0.0126643
ALDH1L2	ENST00000258494.14	1.51749e-05	0.000777441	0.931671	0.215359	6.26375	0.316058	0.0054757	0.0640934	0.0122038	0.0640934
LEF1	ENST00000504775.5	1.54162e-05	0.000787447	3.92473	0.907944	2.4141	5.24693	0.692101	0.090246	0.544443	0.544443
ZC3H18	ENST00000452588.6	1.54778e-05	0.000790004	0.67269	0.155651	5.90426	0.159882	0.0220575	0.00810355	0.0142834	0.0142834
LDB2	ENST00000507464.5	1.56021e-05	0.000795163	0.718494	0.166318	5.33831	0.181482	0.021109	0.0121554	0.0203833	0.0203833
TBX3	ENST00000257566.7	1.57064e-05	0.000798692	3.57161	0.82704	2.62185	4.59188	0.58646	0.36975	0.439532	0.439532
PHLDA1	ENST00000602540.5	1.6081e-05	0.000817135	0.752756	0.174518	7.60452	0.20654	0.00520235	0.0404826	0.00815163	0.0404826
NKD1	ENST00000564336.1	1.61911e-05	0.000822117	3.71704	0.862057	1.89177	4.83491	0.235349	0.627136	0.879365	0.879365
SYT6	ENST00000610096.1	1.84311e-05	0.000924881	4.78918	1.11816	1.70145	7.23881	0.847832	-0.400422	1.02759	1.02759
SMYD2	ENST00000471645.5	1.93191e-05	0.000964488	2.73241	0.639517	3.42565	2.45896	0.4491	-0.175179	0.164373	0.164373
DDB2	ENST00000256996.8	2.02337e-05	0.00100648	0.737733	0.173083	6.57308	0.199224	0.0034579	0.0414789	0.0107585	0.0414789
C15orf61	ENST00000342683.6	2.03742e-05	0.00101273	1.02443	0.240434	4.06552	0.336005	0.0231217	0.00333962	0.063591	0.063591
NBPF15	ENST00000581897.6	2.03894e-05	0.00101275	0.787237	0.184772	5.8137	0.226892	0.0240959	0.0271152	0.0149525	0.0271152
TMEM144	ENST00000296529.10	2.09764e-05	0.00103618	0.931828	0.219035	4.5734	0.315385	0.0351809	0.0334369	0.0367838	0.0367838
STAT1	ENST00000409465.5	2.1378e-05	0.00105193	0.689109	0.162144	6.18398	0.17401	0.0263855	0.0130504	0.0126092	0.0130504
MVB12B	ENST00000361171.8	2.17801e-05	0.00106788	0.598551	0.140974	5.59667	0.131328	0.00461488	0.0251958	0.0169491	0.0251958
ESYT2	ENST00000275418.12	2.27062e-05	0.00110932	0.912424	0.215374	7.04519	0.305418	0.00194205	0.0676367	0.0091357	0.0676367
ANG	ENST00000397990.4	2.40297e-05	0.00116897	1.02878	0.243571	4.24894	0.365352	0.038076	0.0217222	0.050914	0.050914
NPAS2	ENST00000335681.10	2.42513e-05	0.00117724	1.7519	0.414978	3.40383	0.981077	0.088656	-0.0132364	0.169654	0.169654
BUD31	ENST00000403633.6	2.44632e-05	0.00118584	0.591498	0.140175	5.55431	0.1215	0.0120531	0.00862132	0.0174207	0.0174207
ZNF589	ENST00000457782.5	2.52433e-05	0.00121762	0.625431	0.148466	6.24087	0.132459	0.0207455	-0.00185808	0.0123178	0.0123178
KLF18	ENST00000634670.1	2.67963e-05	0.00128259	1.76287	0.41982	3.55165	1.14381	0.0411303	0.223243	0.136317	0.223243
DCLK1	ENST00000360631.7	2.68448e-05	0.00128333	0.830182	0.197724	5.84549	0.253674	0.0315594	0.0270825	0.0147085	0.0270825
SEMA3C	ENST00000427167.5	2.73e-05	0.00130396	3.89175	0.927734	1.79787	4.94678	0.340276	0.16357	0.95076	0.95076
RCC1	ENST00000649185.1	2.78073e-05	0.0013245	0.66069	0.157656	6.43902	0.16078	0.0141478	0.0231351	0.0113692	0.0231351
ARHGAP10	ENST00000336498.7	2.81208e-05	0.00133571	0.801467	0.191364	5.69566	0.236649	0.00616047	0.04877	0.0159593	0.04877
SMARCA2	ENST00000634925.1	2.83108e-05	0.0013436	2.79286	0.667087	4.59831	2.63377	0.631528	-0.264337	0.0359796	0.0359796
SH3KBP1	ENST00000397821.8	2.89003e-05	0.00136799	0.703724	0.168276	5.57628	0.182548	0.0129104	0.0295648	0.0171721	0.0295648
UNC93A	ENST00000230256.8	2.9186e-05	0.0013796	3.53993	0.846929	2.60202	4.62009	0.447362	0.628572	0.448934	0.628572
DTD1	ENST00000494921.2	3.05163e-05	0.00143851	1.73673	0.416523	3.29908	0.933195	0.0635753	-0.0281626	0.196662	0.196662
GSTM2	ENST00000624726.1	3.2975e-05	0.00153747	1.27012	0.305914	4.88799	0.59626	0.0119995	0.128375	0.028442	0.128375
R3HDM2	ENST00000402412.5	3.31829e-05	0.00154296	0.66051	0.159142	6.56085	0.161273	0.00421159	0.0337776	0.0108121	0.0337776
ENOSF1	ENST00000584259.6	3.31674e-05	0.00154296	0.654936	0.157795	5.11052	0.157086	0.0132109	0.0222934	0.024138	0.024138
MTHFD2	ENST00000394053.7	3.35152e-05	0.00155735	0.726874	0.175228	8.42848	0.19535	0.000455985	0.0456012	0.0082172	0.0456012
PTCHD4	ENST00000398738.2	3.37678e-05	0.00156803	2.11487	0.510044	3.47172	1.65398	0.0885322	0.301685	0.153626	0.301685
TLL2	ENST00000357947.4	3.38841e-05	0.00157023	0.808068	0.194919	4.53271	0.241485	0.0172621	0.0397282	0.0381656	0.0397282
PRKG1	ENST00000373975.3	3.39563e-05	0.00157251	1.00347	0.242081	4.54438	0.314743	0.0501449	-0.034322	0.0377602	0.0377602
UNC93A	ENST00000503433.5	3.42292e-05	0.00158301	3.78942	0.914583	1.54719	4.70323	0.0959444	0.398195	1.15875	1.15875
GTF2I	ENST00000620631.4	3.42292e-05	0.00158301	0.643397	0.155285	5.28273	0.151848	0.0149069	0.0196679	0.0212631	0.0212631
MED10	ENST00000255764.4	3.44978e-05	0.0015922	0.919989	0.222137	6.0179	0.313128	0.00268618	0.071331	0.0135435	0.071331
METTL2A	ENST00000616852.1	3.51999e-05	0.00162024	0.723144	0.174803	4.9871	0.176169	0.0194185	0.00469147	0.0264154	0.0264154
BMP2K	ENST00000335016.9	3.61862e-05	0.00165933	0.729169	0.17653	5.48347	0.196901	0.0177885	0.0289556	0.0182833	0.0289556
CNKSR3	ENST00000433165.6	3.65553e-05	0.00167138	0.874119	0.211741	4.54443	0.250285	0.0294931	-0.00316841	0.0377586	0.0377586
RBP1	ENST00000483943.6	3.77602e-05	0.00171958	1.93948	0.47066	3.09607	1.2401	0.0766992	0.0628253	0.255581	0.255581
DPP10	ENST00000310323.12	3.8525e-05	0.00174648	0.678922	0.164941	5.18946	0.144412	0.0180221	-0.0103577	0.0227862	0.0227862
NA	ENST00000367104.8	3.85294e-05	0.00174648	1.03222	0.250775	4.0443	0.329017	0.0289074	-0.0171932	0.0654251	0.0654251
CNTNAP2	ENST00000613345.2	3.85828e-05	0.00174659	1.0815	0.262766	8.14567	0.433745	0.00206518	0.101504	0.00799735	0.101504
ADGRL2	ENST00000370717.6	3.87979e-05	0.00175516	0.758421	0.184328	6.72638	0.187735	0.0408261	-0.0218587	0.010139	0.010139
AC005682.1	ENST00000452069.1	3.95318e-05	0.00178221	1.6641	0.404872	3.32407	0.932498	0.0559024	0.0712536	0.18998	0.18998
ADAMTS19	ENST00000509467.1	4.04489e-05	0.00181784	1.68173	0.409689	4.02897	0.866716	0.184963	-0.162152	0.0668041	0.0668041
ZFHX3	ENST00000268489.10	4.15227e-05	0.00185756	1.65339	0.40338	5.13066	0.954285	0.220287	-0.0525687	0.0237865	0.0237865
CPXM2	ENST00000241305.4	4.28127e-05	0.00191152	1.16322	0.284284	5.05866	0.502905	0.0124924	0.108734	0.025067	0.108734
NIPA1	ENST00000559448.5	4.3987e-05	0.00195555	1.05587	0.258446	5.11887	0.414614	0.0453845	0.0548069	0.0239916	0.0548069
TRABD2A	ENST00000479944.5	4.50691e-05	0.00199663	1.07138	0.262604	4.57105	0.42711	0.0156136	0.0878281	0.0368611	0.0878281
NIPA2	ENST00000359727.8	4.57539e-05	0.00202174	0.865163	0.212241	5.26709	0.255453	0.0460554	-0.0074299	0.0215141	0.0215141
ATXN2L	ENST00000564304.5	4.62153e-05	0.00203949	0.746493	0.183234	6.03789	0.175177	0.0369392	-0.0269377	0.0134229	0.0134229
ZNF516	ENST00000617840.1	4.62905e-05	0.0020415	0.843863	0.207154	4.62807	0.235177	0.0293108	-0.00237872	0.0350583	0.0350583
EIF4A2	ENST00000425053.5	4.96196e-05	0.00217291	0.721431	0.177806	7.37367	0.194077	0.00480135	0.042621	0.00844936	0.042621
PAAF1	ENST00000310571.7	4.9756e-05	0.00217749	0.728654	0.179614	4.70822	0.190814	0.0156245	0.0237923	0.0327675	0.0327675
NVL	ENST00000391875.6	5.00807e-05	0.0021889	5.46404	1.3474	2.03891	9.24411	1.94948	-1.59027	0.773748	0.773748
FZD1	ENST00000287934.3	5.10623e-05	0.00222754	1.22747	0.303026	4.49953	0.562197	0.0162355	0.121502	0.0393607	0.121502
EZH2	ENST00000460911.5	5.11725e-05	0.00223092	0.700439	0.172939	6.28474	0.179603	0.0327614	0.00776155	0.0121005	0.0121005
C1orf112	ENST00000413811.3	5.35262e-05	0.0023173	0.619313	0.153308	5.41784	0.139683	0.0160796	0.0146937	0.0191752	0.0191752
CAMK2D	ENST00000394522.7	5.42277e-05	0.00234175	1.36197	0.337403	4.22014	0.693094	0.0720973	0.0986639	0.052601	0.0986639
MIXL1	ENST00000557734.1	5.58086e-05	0.00239815	5.38967	1.33743	3.82518	10.861	0.587076	2.09601	0.0897982	2.09601
SLC3A2	ENST00000338663.11	5.58492e-05	0.00239815	0.866214	0.214958	7.91567	0.280546	0.00186451	0.0674456	0.00797174	0.0674456
ZNRF1	ENST00000335325.8	5.58445e-05	0.00239815	0.623761	0.15479	5.6697	0.145475	0.0079956	0.0279445	0.0162048	0.0279445
AL035078.4	ENST00000532942.5	5.81537e-05	0.00248154	0.630056	0.156723	6.80334	0.148566	0.00419869	0.0326446	0.00986313	0.0326446
RPL10A	ENST00000478340.2	6.00616e-05	0.00255499	1.02131	0.254527	5.87004	0.390661	0.0110554	0.0861204	0.014527	0.0861204
RBM39	ENST00000403542.6	6.07517e-05	0.00258114	4.55973	1.13713	2.65061	7.78902	1.49953	0.440057	0.426138	0.440057
CCDC90B	ENST00000525503.5	6.09543e-05	0.00258814	0.720875	0.17981	5.41112	0.179234	0.0292255	-5.62996e-05	0.0192722	0.0192722
ADGRL2	ENST00000359929.7	6.13159e-05	0.00259737	0.609375	0.152052	7.56288	0.139145	0.00382513	0.0308544	0.00819473	0.0308544
WDR41	ENST00000507029.5	6.25877e-05	0.00264274	0.603702	0.150819	5.71981	0.121538	0.0183801	-0.00312848	0.0157393	0.0157393
SGCD	ENST00000435422.7	6.30763e-05	0.00266173	1.85106	0.462651	3.09939	1.07048	0.0665036	-0.0133202	0.254565	0.254565
NA	ENST00000302102.9	6.34723e-05	0.00267514	5.6264	1.40677	2.12006	9.62483	2.24938	-2.0895	0.719126	0.719126
CNTNAP2	ENST00000463592.3	6.47018e-05	0.0027236	1.27408	0.31892	7.24781	0.609035	0.0214406	0.131125	0.00867417	0.131125
TACR3	ENST00000304883.3	6.59709e-05	0.00277021	0.682637	0.171071	4.66852	0.15971	0.0100288	0.0148613	0.0338692	0.0338692
FAM76B	ENST00000540054.5	6.68992e-05	0.00279718	0.964807	0.241985	4.17927	0.309694	0.0326808	0.00536761	0.0551543	0.0551543
SLC34A2	ENST00000382051.8	6.73238e-05	0.0028115	1.24802	0.313135	5.15415	0.584928	0.00801151	0.139069	0.0233825	0.139069
VCAN	ENST00000503923.1	6.83288e-05	0.00284479	0.712042	0.178814	4.63602	0.166163	0.0131427	0.00443475	0.0348188	0.0348188
KLF11	ENST00000305883.6	6.84238e-05	0.00284701	4.80198	1.20601	1.70784	7.08244	1.15933	-0.9534	1.02237	1.02237
FBXO9	ENST00000244426.10	7.10621e-05	0.00294248	1.04087	0.262006	4.18822	0.407401	0.0475052	0.0554656	0.0545787	0.0554656
INVS	ENST00000262457.7	7.27602e-05	0.0030019	0.846646	0.213418	4.73766	0.2697	0.0232837	0.0450373	0.0319889	0.0450373
IQCH	ENST00000546225.5	7.29769e-05	0.00300902	4.25285	1.07223	1.43328	5.47763	0.46251	-0.39801	1.26201	1.26201
ZIC1	ENST00000282928.5	7.46522e-05	0.00306517	2.19035	0.552987	2.81528	1.69337	0.103703	0.213895	0.354989	0.354989
DCLK1	ENST00000255448.8	7.53602e-05	0.00308869	1.90654	0.481607	5.84638	1.24406	0.333216	-0.141222	0.0147019	0.0147019
DRAM2	ENST00000286692.8	7.67702e-05	0.00313708	1.16157	0.293751	5.25397	0.431005	0.107709	-0.0749189	0.0217259	0.0217259
PHF10	ENST00000621772.4	7.72104e-05	0.00315131	0.595716	0.150704	6.46207	0.133717	0.0100351	0.0240322	0.0112627	0.0240322
GATA4	ENST00000528712.5	8.19873e-05	0.00333025	2.62834	0.667344	3.00155	2.30126	0.38201	-0.0960018	0.286011	0.286011
METAP1D	ENST00000315796.5	8.45185e-05	0.00340807	0.598177	0.152161	5.03578	0.120431	0.00924036	0.00711695	0.0254891	0.0254891
CTSB	ENST00000453527.6	8.55705e-05	0.0034392	1.23343	0.313989	6.39905	0.503608	0.136329	-0.0773205	0.0115551	0.0115551
ZNF106	ENST00000565380.5	8.5935e-05	0.0034498	0.723705	0.184279	5.86172	0.196409	0.0363505	0.0127556	0.0145879	0.0145879
RAD50	ENST00000378823.8	8.64989e-05	0.00346675	0.586196	0.149325	6.92693	0.129845	0.0154287	0.0180182	0.00946602	0.0180182
ZDHHC14	ENST00000341375.12	8.87057e-05	0.0035382	3.66553	0.935185	1.89692	4.77366	0.43633	0.492208	0.875527	0.875527
COL1A2	ENST00000620463.1	8.98491e-05	0.00356924	0.62395	0.159314	7.46156	0.147251	0.0037747	0.0342966	0.00831893	0.0342966
ADGRV1	ENST00000405460.9	9.02445e-05	0.00358288	0.660303	0.168641	7.42363	0.164928	0.00261906	0.0400409	0.00837259	0.0400409
RELA	ENST00000308639.13	9.13672e-05	0.00361905	4.15635	1.06234	1.38503	5.24931	0.385508	-0.302082	1.30735	1.30735
SCRN3	ENST00000272732.10	9.94747e-05	0.00390852	0.733907	0.188574	4.61384	0.178318	0.0178468	0.00306796	0.0354937	0.0354937
TNRC18	ENST00000440081.2	9.95403e-05	0.00390885	1.31317	0.337428	3.71529	0.599487	0.0646092	0.0380912	0.106177	0.106177
OLFML3	ENST00000369551.5	0.000100909	0.00395128	0.996747	0.256339	5.19159	0.332819	0.0758138	-0.0323545	0.0227507	0.0227507
MPP1	ENST00000413259.7	0.000101901	0.00398328	4.08529	1.05128	1.3495	5.02401	0.316446	-0.295017	1.34133	1.34133
KCNH8	ENST00000328405.7	0.000102583	0.00400668	1.18073	0.303968	4.48998	0.529116	0.0643586	0.0742363	0.0397168	0.0742363
EFHD1	ENST00000611312.1	0.000103052	0.0040168	0.719502	0.185282	5.00481	0.162307	0.0254201	-0.0166681	0.0260737	0.0260737
AGFG2	ENST00000474713.1	0.000103727	0.0040349	1.06245	0.273707	4.04199	0.398769	0.0467431	0.0284184	0.0656303	0.0656303
ADAMTS16	ENST00000511368.5	0.000104005	0.00404014	0.821608	0.211697	4.53296	0.22933	0.0290664	0.00445569	0.0381571	0.0381571
PCLAF	ENST00000300035.9	0.000104067	0.00404026	0.601194	0.154911	5.18073	0.125787	0.0130635	0.00863301	0.0229325	0.0229325
EPB41L3	ENST00000544123.5	0.000111849	0.00431303	0.839864	0.217393	4.94503	0.220877	0.0436391	-0.0320565	0.0272508	0.0272508
NA	ENST00000619417.1	0.000113338	0.00436553	0.964652	0.249903	5.20198	0.354108	0.0429916	0.0506857	0.0225777	0.0506857
RC3H2	ENST00000423239.6	0.000114152	0.0043944	0.598681	0.155165	5.58514	0.122277	0.0190398	-0.000600497	0.0170743	0.0170743
MACROH2A1	ENST00000512507.5	0.000114562	0.00440772	0.596264	0.154573	4.96683	0.133706	0.0090258	0.0247829	0.0268136	0.0268136
GLYR1	ENST00000588732.5	0.000115392	0.00443217	0.724122	0.187805	5.37368	0.169184	0.0330743	-0.0182261	0.0198317	0.0198317
LUC7L	ENST00000629543.2	0.000115947	0.0044485	5.31211	1.37814	1.96303	8.85069	2.02171	-1.54028	0.827202	0.827202
GOSR2	ENST00000640051.1	0.000116623	0.00446691	0.648092	0.168199	5.60438	0.156238	0.0255699	0.0122185	0.0168665	0.0168665
SLC6A7	ENST00000230671.7	0.000119363	0.00454894	3.83752	0.997424	1.22561	4.4186	0.0284652	-0.0276773	1.46382	1.46382
TRIM8	ENST00000643376.1	0.000122542	0.00465457	0.806299	0.20992	5.47303	0.247915	0.0164311	0.0496685	0.018419	0.0496685
PCSK1	ENST00000509190.1	0.000124327	0.00471189	3.75941	0.979667	1.52755	4.4941	0.263453	0.0542459	1.17617	1.17617
TCP1	ENST00000543532.5	0.000124579	0.00471853	0.672667	0.175314	5.09862	0.166247	0.0217543	0.016374	0.0243479	0.0243479
CYS1	ENST00000381813.4	0.000126333	0.00476157	1.81531	0.473539	3.09806	1.11514	0.0813886	0.0767758	0.25497	0.25497
TKFC	ENST00000394900.7	0.000126981	0.00478334	0.613597	0.160114	5.15976	0.143672	0.015168	0.0232334	0.023287	0.023287
PCGF1	ENST00000233630.11	0.000131407	0.00492569	0.725853	0.189825	4.65644	0.193306	0.0198331	0.0242259	0.034217	0.034217
GSTO1	ENST00000493946.1	0.000133991	0.00499248	2.48797	0.651472	5.27086	1.91163	0.61517	-0.546889	0.0214534	0.0214534
APLP2	ENST00000338167.9	0.000135385	0.00503343	5.3435	1.40012	1.97877	9.18342	2.12459	-1.35271	0.815928	0.815928
BNIP3	ENST00000633835.1	0.000137438	0.00510422	1.28203	0.336251	5.75281	0.628761	0.0138244	0.155772	0.0154508	0.155772
DGUOK	ENST00000629438.2	0.000138366	0.00513591	0.61747	0.16202	5.82828	0.139632	0.0245364	0.00702837	0.0148393	0.0148393
HNRNPDL	ENST00000502762.4	0.000145524	0.00535799	0.846948	0.222964	5.00977	0.237171	0.0485903	-0.0211212	0.0259791	0.0259791
NCOA4	ENST00000580070.5	0.000146241	0.00538152	1.0278	0.270662	5.80519	0.329151	0.0948672	-0.0795709	0.0150197	0.0150197
SP9	ENST00000394967.3	0.000146912	0.00540331	3.30717	0.871171	1.82518	3.54166	0.208708	0.116867	0.929699	0.929699
GSTO1	ENST00000369713.10	0.000148167	0.00543455	0.693641	0.18282	7.08813	0.184449	0.0015036	0.048631	0.00902718	0.048631
PIGP	ENST00000399098.5	0.000148502	0.0054384	1.56031	0.411304	3.75532	0.927734	0.153891	0.0928193	0.0998651	0.0998651
ATP5PF	ENST00000400093.3	0.000151397	0.00551785	0.628144	0.165791	4.91409	0.138827	0.0133421	0.0122302	0.0278879	0.0278879
ADAL	ENST00000562188.6	0.000152446	0.00554723	0.716155	0.189106	5.111	0.182949	0.0295122	0.00684481	0.0241296	0.0241296
GCFC2	ENST00000472230.5	0.000152395	0.00554723	0.934641	0.246794	4.84892	0.335155	0.06046	0.0309007	0.0293025	0.0309007
NKX6-1	ENST00000295886.4	0.000158629	0.00573864	3.54911	0.939624	1.70334	4.42523	0.298299	0.509671	1.02604	1.02604
LEF1	ENST00000265165.6	0.000160122	0.00577433	4.13187	1.09459	2.17604	5.98255	1.11414	-0.0380647	0.68304	0.68304
DCAF13	ENST00000616836.4	0.000163077	0.00587163	0.940401	0.249426	4.69079	0.307094	0.0600763	-0.00784162	0.0332437	0.0332437
CEP19	ENST00000409690.4	0.000164202	0.0059028	0.782056	0.207522	4.28356	0.231357	0.0155983	0.0442445	0.0489997	0.0489997
SHISAL2B	ENST00000509189.5	0.000164701	0.00591075	1.37909	0.36602	3.88558	0.731327	0.0427573	0.158199	0.0820311	0.158199
SMARCA2	ENST00000450198.6	0.000165146	0.005915	4.75556	1.26239	2.91031	8.69695	0.773219	1.61722	0.318285	1.61722
IDH1	ENST00000415913.5	0.000166608	0.00596427	1.72953	0.459381	5.55702	1.14941	0.299157	0.0158772	0.0173895	0.0173895
RFFL	ENST00000315249.11	0.000170103	0.00607348	5.30679	1.41148	1.96898	8.64108	2.1655	-1.9249	0.822932	0.822932
PSMD7	ENST00000568717.1	0.000172892	0.00616021	1.04673	0.278707	5.5266	0.365714	0.0987695	-0.0524897	0.0177466	0.0177466
CSK	ENST00000439220.6	0.000175968	0.00625679	0.605391	0.161385	5.71428	0.121987	0.0232785	-0.00823134	0.015789	0.015789
IRX2	ENST00000302057.6	0.000177523	0.00629899	1.26757	0.338107	6.01458	0.619201	0.00574069	0.165734	0.0135637	0.165734
ATXN10	ENST00000476998.5	0.000181261	0.00639705	4.61252	1.23204	1.67567	6.39352	1.2281	-1.21445	1.0488	1.0488
CARS1	ENST00000380525.8	0.000183483	0.00646023	0.920082	0.245963	6.18737	0.263432	0.0781552	-0.0663214	0.0125915	0.0125915
RAD51	ENST00000531277.2	0.000184107	0.00647885	3.4642	0.926285	1.96075	4.6298	0.238625	1.04838	0.828842	1.04838
WNT5B	ENST00000543071.5	0.000187263	0.00656628	3.5405	0.94777	1.52042	4.0423	0.16487	0.187337	1.18253	1.18253
MBNL3	ENST00000394311.6	0.00018786	0.0065805	2.18592	0.585284	3.79226	1.6155	0.419443	-0.191921	0.0943937	0.0943937
GTF2IP13	ENST00000609439.2	0.000191726	0.00667132	0.825376	0.2213	5.14565	0.263142	0.00744072	0.0660196	0.0235281	0.0660196
NBPF8	ENST00000652355.1	0.000197192	0.0068169	1.15203	0.309471	4.71714	0.484397	0.11113	-0.00332738	0.0325284	0.0325284
FBXO5	ENST00000367241.3	0.000201286	0.00693716	0.677645	0.18229	5.72341	0.177636	0.0240017	0.0258428	0.0157071	0.0258428
SPATA18	ENST00000295213.9	0.000203039	0.00698352	0.846868	0.227946	4.28884	0.226298	0.0292208	-0.0152928	0.0487186	0.0487186
FAAP24	ENST00000588258.5	0.000208485	0.00714769	0.768394	0.207198	4.41082	0.208171	0.021502	0.0173014	0.0428942	0.0428942
SLC9A7	ENST00000328306.4	0.000215731	0.00735356	4.41316	1.1928	1.57521	5.86578	0.999968	-0.971243	1.13418	1.13418
DCTN4	ENST00000446090.6	0.000218261	0.0074361	0.610578	0.16516	5.48831	0.130373	0.0226956	0.000467878	0.0182212	0.0182212
ZNF296	ENST00000303809.7	0.000219581	0.00747362	0.877281	0.237401	5.22678	0.298517	0.00646729	0.0780716	0.0221686	0.0780716
MBNL3	ENST00000442191.5	0.000226555	0.00766904	3.54459	0.961271	1.53502	4.04701	0.216542	0.130673	1.16952	1.16952
ERICH2	ENST00000409885.1	0.000235796	0.00794255	1.01807	0.276859	3.79753	0.33355	0.0213347	0.00692836	0.0936416	0.0936416
GSTO2	ENST00000369707.2	0.000238909	0.00801696	0.678542	0.184694	5.7652	0.174992	0.035822	0.0102611	0.0153459	0.0153459
TADA2A	ENST00000615182.5	0.000238757	0.00801696	0.628298	0.171011	4.946	0.133526	0.0166358	0.00223669	0.0272311	0.0272311
CLIC6	ENST00000349499.2	0.000245213	0.00817529	0.598025	0.163074	4.78157	0.125333	0.00900645	0.0135468	0.0308831	0.0308831
P2RY11	ENST00000321826.5	0.000247326	0.00823771	0.817453	0.223042	4.2186	0.217474	0.0219277	-0.000670708	0.052694	0.052694
IPCEF1	ENST00000265198.8	0.000252514	0.00838601	1.08813	0.297327	3.83065	0.408008	0.0435453	0.0224564	0.0890599	0.0890599
BCHE	ENST00000264381.8	0.000254617	0.00844357	0.679155	0.185685	4.72404	0.164436	0.019373	0.0132031	0.0323452	0.0323452
ERBB4	ENST00000436443.5	0.000264631	0.008746	3.92343	1.0756	2.26967	5.95778	1.1097	0.565051	0.625674	0.625674
HGSNAT	ENST00000379644.9	0.000267693	0.00883439	0.599892	0.164593	4.84242	0.123549	0.0111866	0.00829805	0.0294494	0.0294494
PHF7	ENST00000327906.8	0.00027386	0.00900749	0.713845	0.196173	4.58923	0.197697	0.0214568	0.0345746	0.0362692	0.0362692
CCNT1	ENST00000417344.2	0.000279919	0.00917594	0.97497	0.26835	4.79636	0.332475	0.0774926	-0.0183608	0.0305247	0.0305247
FLT4	ENST00000261937.11	0.000282765	0.00925615	0.810854	0.223339	5.12736	0.257102	0.0138369	0.0609836	0.0238438	0.0609836
PRR15	ENST00000319694.3	0.000289487	0.00943534	0.694869	0.191713	5.07249	0.188958	0.00628955	0.0488412	0.0248156	0.0488412
HERC3	ENST00000452979.5	0.000290846	0.00946163	3.38795	0.935042	1.71155	4.15205	0.292104	0.593623	1.01935	1.01935
FBXW4	ENST00000331272.8	0.000291351	0.00946905	0.624548	0.17239	5.51913	0.15268	0.00682299	0.0377547	0.0178369	0.0377547
LIAS	ENST00000381846.2	0.000296654	0.00961857	0.979835	0.270807	4.70339	0.376027	0.0745118	0.0354928	0.0328984	0.0354928
SNHG32	ENST00000375640.7	0.000303778	0.00978464	1.09751	0.303848	4.53962	0.47215	0.0123725	0.126113	0.0379249	0.126113
SNHG32	ENST00000424962.6	0.000303778	0.00978464	1.09751	0.303848	4.53962	0.47215	0.0123725	0.126113	0.0379249	0.126113
SNHG32	ENST00000444974.6	0.000303778	0.00978464	1.09751	0.303848	4.53962	0.47215	0.0123725	0.126113	0.0379249	0.126113
SNHG32	ENST00000414536.6	0.000303778	0.00978464	1.09751	0.303848	4.53962	0.47215	0.0123725	0.126113	0.0379249	0.126113
PDCD11	ENST00000493610.2	0.00030625	0.00984472	1.336	0.370089	3.69479	0.699832	0.0646297	0.140819	0.109568	0.140819
PCDHA8	ENST00000378123.4	0.000307379	0.00986814	0.883288	0.244746	4.01738	0.274588	0.0219738	0.0286877	0.0678769	0.0678769
RNF170	ENST00000527424.6	0.000313455	0.0100514	0.611672	0.169724	5.85865	0.146811	0.00691228	0.0362972	0.0146105	0.0362972
NA	ENST00000331662.3	0.000313527	0.0100514	0.823124	0.228401	5.64482	0.26586	0.0322853	0.045965	0.0164491	0.045965
SLCO2A1	ENST00000493729.5	0.000314892	0.0100857	3.02847	0.840604	2.46317	3.59943	0.519078	0.540845	0.518423	0.540845
BCDIN3D	ENST00000333924.6	0.000316127	0.0101205	0.619185	0.171914	4.67769	0.13444	0.0107224	0.013556	0.0336092	0.0336092
ATP6AP1L	ENST00000380167.8	0.000325592	0.0103702	0.94732	0.263581	3.97831	0.29123	0.0325201	-0.00501356	0.0716922	0.0716922
CASZ1	ENST00000377022.8	0.000326934	0.0104057	0.770207	0.214365	4.5745	0.233108	0.0242281	0.0447005	0.0367475	0.0447005
EFHD1	ENST00000264059.8	0.000328872	0.0104503	0.912809	0.254163	4.53128	0.327485	0.0572428	0.0396556	0.0382161	0.0396556
ZFAND1	ENST00000521287.5	0.000328847	0.0104503	0.9323	0.259589	4.75736	0.318284	0.0695946	0.0023161	0.031485	0.031485
IFRD1	ENST00000403825.8	0.000332056	0.0105417	1.02073	0.284412	6.72877	0.409636	0.00523116	0.116104	0.0101301	0.116104
AP002990.1	ENST00000496634.2	0.000334239	0.0106012	0.595617	0.166039	5.20054	0.121647	0.018752	0.000271165	0.0226015	0.0226015
FBXL6	ENST00000331890.6	0.00033965	0.0107479	0.60924	0.170036	4.71385	0.137228	0.010752	0.0215927	0.0326162	0.0326162
FBXL6	ENST00000644788.2	0.00033965	0.0107479	0.60924	0.170036	4.71385	0.137228	0.010752	0.0215927	0.0326162	0.0326162
MNX1	ENST00000252971.11	0.000340572	0.0107528	3.47223	0.969271	1.42685	4.0159	0.141235	0.357502	1.26799	1.26799
PIGH	ENST00000216452.9	0.000346206	0.010915	0.690389	0.192953	4.51263	0.170372	0.0169646	0.0172619	0.0388815	0.0388815
LONRF1	ENST00000643654.1	0.000351137	0.0110349	0.67982	0.190196	5.75026	0.17097	0.038789	0.00161543	0.0154726	0.0154726
ZBTB8OS	ENST00000468695.5	0.000353604	0.011092	0.673542	0.188536	4.69352	0.146567	0.0201503	-0.00706295	0.0331683	0.0331683
MBNL3	ENST00000436215.5	0.00035422	0.0111012	3.30441	0.925079	1.9618	3.90505	0.455574	0.331062	0.828081	0.828081
BCL7A	ENST00000261822.4	0.000361444	0.011264	0.701951	0.196804	4.37806	0.166995	0.0137593	0.0102091	0.0443387	0.0443387
BCL7A	ENST00000635403.1	0.000361444	0.011264	0.701951	0.196804	4.37806	0.166995	0.0137593	0.0102091	0.0443387	0.0443387
RPRM	ENST00000325926.4	0.000363402	0.0113092	0.712545	0.199854	4.53246	0.200246	0.010923	0.0489895	0.0381745	0.0489895
NIPA2	ENST00000398014.6	0.000375912	0.0116235	0.893017	0.251098	5.28635	0.297867	0.0733703	-9.16617e-05	0.0212053	0.0212053
ARPC4	ENST00000440787.5	0.000379347	0.0117011	1.22917	0.345849	3.93457	0.535085	0.103079	-0.000791099	0.0763382	0.0763382
ARPC4	ENST00000417500.5	0.000383032	0.0117911	1.14848	0.323378	4.06255	0.503741	0.0930176	0.0420318	0.0638425	0.0638425
ZFAND1	ENST00000521742.5	0.000390973	0.012011	1.92475	0.542778	3.91046	1.15273	0.362838	-0.31117	0.0790739	0.0790739
SELENOS	ENST00000398226.7	0.00039261	0.0120451	1.21521	0.342795	3.73064	0.473194	0.0725523	-0.0348337	0.10371	0.10371
PLD3	ENST00000594085.5	0.000392553	0.0120451	0.79421	0.224034	4.27366	0.210596	0.0257521	0.000954628	0.0495348	0.0495348
GNAI1	ENST00000650431.1	0.000394368	0.012089	4.02946	1.13704	1.80552	5.31961	0.994448	-0.433652	0.944835	0.944835
NXN	ENST00000575801.5	0.000398029	0.0121677	0.660056	0.186384	6.91696	0.172389	0.0125271	0.0395812	0.00949604	0.0395812
SMARCA2	ENST00000635129.1	0.000403345	0.0122809	3.6741	1.0385	2.01628	5.015	0.828271	0.37835	0.789458	0.789458
RBM20	ENST00000369519.4	0.000406986	0.0123628	1.42188	0.402172	3.86769	0.800616	0.029337	0.213276	0.084244	0.213276
SIPA1L1	ENST00000555818.5	0.000411277	0.0124448	0.696376	0.197121	6.38901	0.19211	0.00656344	0.0517213	0.0116021	0.0517213
SNRPB	ENST00000474384.2	0.000411165	0.0124448	1.35848	0.384533	3.78722	0.731082	0.0905422	0.131256	0.0951209	0.131256
MKX	ENST00000419761.6	0.000418752	0.0126368	1.78555	0.506111	4.47478	1.24291	0.343927	0.0141419	0.040295	0.040295
CLDN1	ENST00000295522.4	0.000418913	0.0126368	0.880434	0.249565	5.17377	0.307288	0.0070877	0.0863364	0.0230496	0.0863364
VAPB	ENST00000265619.6	0.000420144	0.0126628	3.52002	0.997994	2.04689	4.90555	0.725726	0.759757	0.768261	0.768261
PTPRZ1	ENST00000449182.1	0.0004205	0.0126679	0.586454	0.166282	6.59541	0.136358	0.0154922	0.0259822	0.0106621	0.0259822
MACC1	ENST00000332878.8	0.000430852	0.0129456	0.662595	0.188214	5.14536	0.174219	0.0192479	0.0338891	0.0235331	0.0338891
APOBEC3B	ENST00000333467.4	0.000432323	0.0129841	1.21406	0.344949	4.39032	0.503819	0.134696	-0.0576474	0.0437888	0.0437888
RHOB	ENST00000272233.5	0.000438109	0.0131348	1.47527	0.419588	6.06288	0.86419	0.00256914	0.261512	0.0132756	0.261512
HINT1	ENST00000508488.1	0.000444336	0.0132808	0.893171	0.254302	4.33232	0.316929	0.0340527	0.0629514	0.0464979	0.0629514
SMG1P2	ENST00000566127.1	0.000447274	0.0133395	0.683178	0.19461	5.16386	0.168496	0.0335924	0.00200356	0.0232173	0.0232173
UBE2D3	ENST00000338145.7	0.000447087	0.0133395	0.936383	0.26673	5.22546	0.296854	0.0845268	-0.0422638	0.0221903	0.0221903
GAD1	ENST00000445006.5	0.000449692	0.0133941	3.32818	0.948452	1.60842	3.87532	0.243861	0.446503	1.10548	1.10548
ABCF1	ENST00000376545.7	0.000450071	0.0133996	5.53177	1.57653	2.12946	9.52226	3.01518	-2.58755	0.712973	0.712973
BMP2K	ENST00000389010.7	0.000465118	0.0137877	0.824064	0.235442	4.76813	0.270244	0.0343152	0.0488339	0.0312149	0.0488339
HNRNPUL1	ENST00000595018.5	0.00046617	0.0138127	0.600101	0.171483	6.98625	0.120252	0.0348151	-0.0195449	0.00929447	0.00929447
SLC1A4	ENST00000234256.4	0.000468675	0.013857	1.4644	0.418634	5.41059	0.853646	0.0102613	0.25262	0.0192797	0.25262
GLDC	ENST00000639443.1	0.000477197	0.0140543	4.16206	1.19146	1.38788	5.22646	0.824727	-0.787666	1.30464	1.30464
RPL3	ENST00000420536.1	0.00047772	0.0140637	1.8839	0.539343	3.95568	1.41379	0.2611	0.175236	0.0740459	0.175236
BUB1	ENST00000466333.5	0.000480255	0.0141219	4.94571	1.41649	3.18522	9.74574	1.30335	1.70631	0.228802	1.70631
ZNF862	ENST00000223210.5	0.000480319	0.0141219	0.713351	0.204311	4.28409	0.18182	0.0136427	0.0228064	0.0489716	0.0489716
MARCHF8	ENST00000453424.7	0.000486518	0.0142736	4.12768	1.18337	1.37069	5.15993	0.779548	-0.718778	1.321	1.321
METTL27	ENST00000297873.9	0.000490361	0.0143494	0.874311	0.250809	3.96884	0.278399	0.0216938	0.0396473	0.0726638	0.0726638
YTHDF2	ENST00000542507.5	0.000493807	0.0144379	0.964926	0.276952	5.84018	0.367087	0.100305	0.00939761	0.0147485	0.0147485
PGD	ENST00000477958.5	0.000499541	0.0145744	3.05143	0.876597	2.55686	3.71548	0.642916	0.509716	0.470841	0.509716
RBM6	ENST00000443081.5	0.000501684	0.0145996	4.58824	1.31851	1.60097	7.17168	1.49584	-0.425707	1.11187	1.11187
FBXL13	ENST00000455112.6	0.000504296	0.0146569	4.42347	1.27167	2.63604	7.8107	0.98581	1.43991	0.432886	1.43991
PPP1R3B	ENST00000519699.1	0.000506287	0.0146898	1.33447	0.383754	4.58267	0.710962	0.15237	0.0685299	0.0364808	0.0685299
MAN2A2	ENST00000559717.6	0.00052097	0.0150615	4.43003	1.27676	2.82199	7.84369	1.84087	0.604311	0.352293	0.604311
CCL5	ENST00000603197.6	0.000522537	0.0150788	4.96516	1.43132	1.88829	7.72521	2.19107	-1.77935	0.881955	0.881955
TMEM99	ENST00000301665.7	0.000522558	0.0150788	0.909157	0.262086	3.96244	0.266207	0.0297024	-0.00690526	0.0733316	0.0733316
FERMT1	ENST00000536936.1	0.000522542	0.0150788	0.801379	0.231016	5.02243	0.244072	0.0543136	0.00994884	0.0257392	0.0257392
EIF1	ENST00000310837.8	0.000530357	0.015291	0.774699	0.223583	7.32073	0.240035	0.011143	0.0638408	0.00853837	0.0638408
TBC1D5	ENST00000429383.8	0.000533189	0.0153482	0.719583	0.207762	5.30598	0.182118	0.0438542	-0.0103821	0.0208931	0.0208931
SP8	ENST00000361443.4	0.000533237	0.0153482	1.44263	0.416527	3.41297	0.638931	0.0928134	-0.0745958	0.167429	0.167429
BTRC	ENST00000393441.8	0.000546492	0.0156638	4.67588	1.35263	1.64479	6.91118	1.66984	-1.22979	1.07459	1.07459
NBPF1	ENST00000449853.2	0.000550964	0.0157656	0.782894	0.226619	5.57244	0.245504	0.00418699	0.0728472	0.017215	0.0728472
HOXB2	ENST00000330070.5	0.000560942	0.0159909	3.08148	0.893227	1.60337	3.62034	0.086972	0.87763	1.10981	1.10981
NEK9	ENST00000556170.5	0.000562147	0.0160186	0.774573	0.224563	4.82338	0.213775	0.045756	-0.00352392	0.0298867	0.0298867
ILDR2	ENST00000271417.8	0.000566934	0.0161215	0.867309	0.251616	4.66492	0.30164	0.0123201	0.0826457	0.0339723	0.0826457
ZNF577	ENST00000301399.11	0.000567949	0.0161369	0.79618	0.231013	4.66217	0.235055	0.0459991	0.0101054	0.0340513	0.0340513
CCNB1IP1	ENST00000556563.5	0.000580462	0.0164243	0.666577	0.19374	5.61349	0.178339	0.00877773	0.0475248	0.0167703	0.0475248
ACTA2	ENST00000224784.10	0.000585668	0.016544	1.10919	0.322611	3.62193	0.393033	0.0336122	-0.00368508	0.122505	0.122505
ZNF655	ENST00000412636.5	0.000589671	0.0166298	3.12517	0.909452	1.62654	3.6454	0.150635	0.743614	1.09002	1.09002
HEY2	ENST00000368364.4	0.000605354	0.017023	0.815009	0.237667	5.0781	0.267055	0.0126091	0.0721194	0.0247145	0.0721194
AL133216.2	ENST00000622550.2	0.000612515	0.0171989	0.638229	0.186289	4.51083	0.158306	0.0131092	0.0320218	0.0389464	0.0389464
GATA4	ENST00000646696.1	0.000612611	0.0171989	3.55468	1.03757	2.83716	5.0826	0.189594	1.42524	0.346255	1.42524
SUPT16H	ENST00000557652.1	0.000613765	0.0172242	1.84166	0.53764	3.59135	1.12859	0.305232	-0.166395	0.128353	0.128353
TCF7	ENST00000395029.5	0.00061441	0.0172352	1.86659	0.544963	5.03994	1.11274	0.420066	-0.335709	0.0254118	0.0254118
PITX2	ENST00000645131.1	0.000614859	0.0172407	3.68557	1.07609	1.92846	5.33614	0.884668	0.691734	0.852274	0.852274
DNAH9	ENST00000396001.6	0.000616183	0.0172659	2.60071	0.759468	2.36154	2.30928	0.292092	0.0581195	0.573096	0.573096
POLM	ENST00000242248.10	0.000620917	0.0173537	0.702449	0.205256	4.90894	0.198587	0.0234818	0.0397132	0.0279961	0.0397132
NFU1	ENST00000410022.6	0.00062385	0.0174215	0.688885	0.201368	5.1439	0.191028	0.0287697	0.0320538	0.023558	0.0320538
AKNA	ENST00000307564.8	0.00062494	0.0174448	1.20957	0.353619	5.23968	0.588974	0.0245336	0.163035	0.0219579	0.163035
AC079880.1	ENST00000603040.1	0.000626085	0.0174696	0.720619	0.210704	4.81569	0.209063	0.00953891	0.0570554	0.0300661	0.0570554
POLR1D	ENST00000626064.1	0.000643888	0.0178789	0.753276	0.220745	4.4041	0.210392	0.0299087	0.0202968	0.043184	0.043184
EEF1D	ENST00000530445.5	0.000649436	0.0179746	0.860039	0.252205	3.92144	0.231826	0.0175994	-0.00519248	0.0778116	0.0778116
EEF1D	ENST00000634156.1	0.000649436	0.0179746	0.860039	0.252205	3.92144	0.231826	0.0175994	-0.00519248	0.0778116	0.0778116
TIRAP	ENST00000392680.6	0.000653909	0.0180838	4.40313	1.29192	1.50842	5.88124	1.31029	-1.22906	1.19329	1.19329
SPA17	ENST00000532692.1	0.000678137	0.0185737	0.746328	0.21962	4.22059	0.207865	0.0197751	0.0311792	0.0525743	0.0525743
AGFG2	ENST00000300176.9	0.00068611	0.0187471	1.05974	0.312142	3.82398	0.420286	0.0561873	0.0480231	0.0899619	0.0899619
RPS20	ENST00000519807.5	0.000688468	0.0187908	0.636255	0.187457	4.54262	0.145934	0.0148896	0.0157206	0.0378209	0.0378209
PHGDH	ENST00000641213.1	0.000691701	0.0188622	4.64268	1.36837	1.62819	6.63176	1.72005	-1.51327	1.08862	1.08862
RNF19B	ENST00000235150.4	0.000695855	0.0189378	1.03857	0.306255	5.08036	0.436141	0.109826	0.030862	0.0246738	0.030862
CADM1	ENST00000537058.5	0.000701929	0.0190694	0.651057	0.192119	5.54633	0.148727	0.0378515	-0.0108963	0.0175131	0.0175131
ERP29	ENST00000455836.1	0.000711027	0.0192283	1.50307	0.444	6.01594	0.914327	0.0467306	0.248973	0.0135554	0.248973
MCOLN3	ENST00000474447.1	0.000732649	0.0196963	1.07868	0.319414	3.7916	0.395698	0.0585499	-0.000259548	0.0944883	0.0944883
SENP3-EIF4A1	ENST00000614237.1	0.000737592	0.0198123	1.44349	0.427673	4.73158	0.836335	0.24221	0.0218371	0.0321471	0.0321471
CADM1	ENST00000331581.10	0.000738716	0.0198283	3.54656	1.0509	2.05288	4.7922	0.892426	0.381041	0.764153	0.764153
GAD1	ENST00000455008.5	0.000743377	0.0199241	3.55402	1.05365	1.08386	3.85103	0.0535575	0.0235897	1.6117	1.6117
ZEB2	ENST00000409487.7	0.000749871	0.0200506	3.12067	0.925831	2.63838	3.95016	0.808902	0.476842	0.431796	0.476842
TNRC18	ENST00000430969.5	0.000771889	0.0205384	5.19072	1.54362	3.44629	10.9424	3.22145	0.352718	0.15949	0.352718
OS9	ENST00000552285.5	0.000773803	0.0205764	3.89092	1.15732	2.4051	6.14905	1.04213	0.966967	0.549295	0.966967
RPS15A	ENST00000576008.5	0.000782873	0.0207611	0.903094	0.268875	4.18984	0.280428	0.0539659	-0.00927245	0.0544751	0.0544751
NFKBIB	ENST00000313582.6	0.000800809	0.0211385	0.615179	0.183498	4.54976	0.148755	0.0129314	0.031095	0.0375758	0.0375758
NFKBIB	ENST00000635517.2	0.000800809	0.0211385	0.615179	0.183498	4.54976	0.148755	0.0129314	0.031095	0.0375758	0.0375758
FLT4	ENST00000393347.7	0.000802347	0.0211628	0.818957	0.24432	4.98017	0.272838	0.0173483	0.0721902	0.0265506	0.0721902
UROD	ENST00000651476.1	0.000809077	0.0212993	4.14452	1.23729	2.59216	6.99018	1.73149	0.564847	0.453658	0.564847
RIPK4	ENST00000332512.8	0.000812314	0.0213669	0.794419	0.237242	5.4685	0.256871	0.0158169	0.0686085	0.0184785	0.0686085
RBBP4	ENST00000373485.5	0.000812582	0.0213669	0.682997	0.203973	6.15656	0.16952	0.0496533	-0.0126853	0.012754	0.012754
GOLGA8B	ENST00000569100.5	0.000816749	0.0214517	0.623261	0.186212	6.35577	0.152802	0.0402535	0.00507797	0.0117587	0.0117587
SALL1	ENST00000570206.1	0.000817275	0.0214573	0.845584	0.252649	6.36283	0.291101	0.0423896	0.0533575	0.0117253	0.0533575
ACCS	ENST00000263776.8	0.000821408	0.0215575	0.99262	0.296705	3.87964	0.383564	0.0492926	0.0606761	0.0827583	0.0827583
TRABD2A	ENST00000409133.1	0.000846141	0.0220545	0.92942	0.278499	4.35065	0.352221	0.0579184	0.0584245	0.0456117	0.0584245
TRIM66	ENST00000646038.1	0.000868565	0.0225427	0.785734	0.235959	5.38637	0.21871	0.0638765	-0.0220055	0.0196381	0.0196381
EFNB2	ENST00000646441.1	0.000870211	0.0225701	1.3848	0.415926	4.86436	0.718554	0.230533	-0.0514664	0.0289579	0.0289579
POLR1D	ENST00000302979.4	0.00087179	0.0226025	0.610376	0.183355	4.92153	0.149524	0.0226956	0.0245001	0.0277328	0.0277328
RP9P	ENST00000381639.3	0.000886503	0.0228972	3.70164	1.11352	1.15767	4.29665	0.326237	-0.0937374	1.53365	1.53365
ZBTB8OS	ENST00000479075.5	0.000888396	0.0229374	1.10673	0.332984	3.62608	0.392929	0.0445866	-0.0127452	0.121731	0.121731
PCK2	ENST00000216780.8	0.000902487	0.0232137	0.828563	0.249621	7.21526	0.280728	0.000556443	0.0929096	0.00873985	0.0929096
PCK2	ENST00000645217.1	0.000902487	0.0232137	0.828563	0.249621	7.21526	0.280728	0.000556443	0.0929096	0.00873985	0.0929096
SLC25A6	ENST00000475167.6	0.00090504	0.0232706	2.04823	0.617216	4.37538	1.62819	0.526974	-0.0649551	0.0444605	0.0444605
RBP1	ENST00000474490.1	0.000910911	0.023404	2.15027	0.648318	3.87288	1.44635	0.54688	-0.472807	0.0835946	0.0835946
TTC17	ENST00000299240.10	0.000913319	0.023457	0.632896	0.190864	6.58009	0.163882	0.00441248	0.0502312	0.010728	0.0502312
DKK1	ENST00000476752.1	0.000914361	0.0234574	3.83452	1.1565	1.69523	6.01604	0.114233	1.89199	1.03268	1.89199
CBWD1	ENST00000431099.3	0.000913844	0.0234574	0.607115	0.183098	5.00072	0.137032	0.0241352	0.00893388	0.0261522	0.0261522
NBPF9	ENST00000613969.4	0.000919966	0.0235747	4.41531	1.33235	2.64803	7.38583	2.23541	-0.313726	0.427326	0.427326
POLD3	ENST00000527458.5	0.000924084	0.0236625	3.86013	1.16526	1.23692	4.70237	0.584368	-0.294128	1.45238	1.45238
FLNB	ENST00000419752.3	0.000924757	0.0236709	4.55519	1.37516	1.58445	6.40174	1.71047	-1.48946	1.12614	1.12614
DCAKD	ENST00000452796.6	0.000941561	0.0239933	4.55068	1.3759	1.58219	6.23757	1.71154	-1.68035	1.1281	1.1281
C7	ENST00000313164.9	0.000951081	0.024206	1.91116	0.578331	2.79243	1.21753	0.137408	0.0148058	0.364292	0.364292
ALDH1L2	ENST00000552270.1	0.000958757	0.0243409	3.54106	1.07228	2.4649	4.70807	1.20716	-0.024245	0.517523	0.517523
PLSCR1	ENST00000448787.6	0.000958553	0.0243409	0.866735	0.262455	4.92495	0.234661	0.0756619	-0.0640464	0.0276618	0.0276618
PTPN14	ENST00000491277.1	0.000959841	0.0243594	0.815261	0.246896	4.27989	0.272544	0.0142913	0.0771452	0.0491974	0.0771452
EXOC7	ENST00000411744.6	0.000967895	0.0245284	3.79557	1.15028	2.34924	5.90968	0.859729	1.12498	0.579923	1.12498
NMNAT3	ENST00000413939.6	0.000967936	0.0245284	4.02572	1.22003	1.60033	4.97326	1.12029	-0.981132	1.11243	1.11243
UNC13B	ENST00000619578.4	0.000973897	0.0246182	0.704003	0.213466	6.27052	0.189704	0.0561814	-0.00490925	0.0121703	0.0121703
RNF43	ENST00000581868.1	0.000982879	0.0247513	2.9232	0.887059	2.47378	3.50778	0.191677	0.988634	0.512896	0.988634
SSTR1	ENST00000267377.3	0.000994282	0.0249925	1.00332	0.304761	4.36061	0.413448	0.0144851	0.124834	0.0451423	0.124834
CCNB1IP1	ENST00000437553.6	0.000996002	0.0250082	4.36769	1.3269	2.80756	7.83581	0.461421	2.17957	0.358112	2.17957
EIF3B	ENST00000465670.1	0.000995881	0.0250082	0.617265	0.187522	4.61567	0.156503	0.0135697	0.0391773	0.0354373	0.0391773
IPO4	ENST00000559588.5	0.00101195	0.0253622	4.00789	1.21925	1.31164	4.92618	0.851753	-0.717734	1.3781	1.3781
IPO4	ENST00000647115.1	0.00101195	0.0253622	4.00789	1.21925	1.31164	4.92618	0.851753	-0.717734	1.3781	1.3781
CCNA1	ENST00000255465.7	0.0010178	0.0254995	0.806015	0.245321	5.30999	0.267117	0.0284232	0.0618501	0.0208296	0.0618501
CDC14B	ENST00000375241.5	0.0010223	0.0255923	0.58721	0.178792	6.14147	0.122432	0.0351149	-0.0113813	0.0128351	0.0128351
ARFRP1	ENST00000618838.4	0.00103493	0.0258623	0.722486	0.220213	5.04905	0.206426	0.0474971	0.0147902	0.0252433	0.0252433
CSAD	ENST00000267085.8	0.00103764	0.0259207	3.98036	1.21348	1.29703	5.03413	0.816371	-0.464949	1.39244	1.39244
CAMK2D	ENST00000296402.9	0.00104611	0.0260844	0.818934	0.249841	4.94596	0.209279	0.0663987	-0.0562941	0.0272318	0.0272318
ADAMTSL2	ENST00000393060.1	0.00105443	0.0262729	3.84519	1.17389	2.40568	6.08927	0.814352	1.25269	0.548983	1.25269
AC240274.1	ENST00000614336.4	0.00105687	0.0263129	1.32843	0.405635	5.65849	0.726865	0.0176916	0.229118	0.0163138	0.229118
AL136295.4	ENST00000561419.1	0.00106231	0.0264211	3.25032	0.992924	1.75476	4.0228	0.494225	0.57256	0.984621	0.984621
AL136295.12	ENST00000644907.1	0.00106231	0.0264211	3.25032	0.992924	1.75476	4.0228	0.494225	0.57256	0.984621	0.984621
TCF12	ENST00000559609.5	0.00106921	0.0265734	3.29215	1.00626	1.92504	4.42293	0.664072	0.800244	0.854781	0.854781
MAP7D2	ENST00000379643.10	0.00107852	0.0267658	0.704166	0.215394	4.69219	0.166612	0.0363869	-0.0140659	0.0332049	0.0332049
CHD3	ENST00000380358.8	0.00109354	0.0270317	0.647546	0.198312	6.38368	0.146106	0.0473645	-0.0219756	0.0116271	0.0116271
CCDC167	ENST00000373408.4	0.00109397	0.0270317	0.835365	0.255841	4.5976	0.287896	0.0117171	0.0864648	0.0360023	0.0864648
RPL37	ENST00000511787.1	0.00110554	0.0272488	3.95291	1.21173	1.28331	5.0221	0.796448	-0.378373	1.406	1.406
LIG3	ENST00000593099.5	0.00111039	0.0273584	0.62374	0.191275	4.84296	0.160619	0.0129292	0.0419502	0.0294373	0.0419502
CKMT1B	ENST00000441322.5	0.00111672	0.0274834	0.707544	0.217082	6.21484	0.166551	0.0582372	-0.0377798	0.0124497	0.0124497
ZFAND3	ENST00000440482.2	0.00112024	0.0275316	0.644899	0.197916	4.9475	0.135412	0.0315556	-0.0182509	0.0272006	0.0272006
IFRD1	ENST00000005558.8	0.00113904	0.0279237	1.08985	0.334955	6.4414	0.490967	0.00560552	0.162687	0.0113582	0.162687
DCLK3	ENST00000416516.2	0.00114649	0.0280561	4.0671	1.2507	1.72917	5.16721	1.34128	-1.08527	1.00509	1.00509
UBXN2B	ENST00000522978.1	0.0011529	0.0282029	0.652173	0.200651	4.49857	0.14607	0.0209949	0.0020942	0.0393964	0.0393964
ERMAP	ENST00000328249.3	0.00117393	0.0285337	0.777243	0.23951	4.56884	0.196372	0.0491133	-0.0301876	0.0369341	0.0369341
PCM1	ENST00000325083.12	0.00118959	0.0288732	0.689815	0.212816	6.84162	0.197103	0.0352339	0.0327023	0.00973424	0.0327023
AK2	ENST00000550338.5	0.00120771	0.0292717	2.19267	0.677366	3.49471	1.61577	0.539764	-0.322976	0.148473	0.148473
SLC52A3	ENST00000488495.2	0.00122015	0.0295207	0.675364	0.208824	4.58379	0.144669	0.0289667	-0.0191746	0.0364446	0.0364446
KLHL23	ENST00000437875.1	0.00123595	0.0298536	0.627656	0.194294	5.05071	0.149941	0.0314122	0.00828205	0.0252128	0.0252128
APC2	ENST00000593146.1	0.00125515	0.0302287	0.846007	0.262243	4.20013	0.297244	0.0188354	0.0843216	0.0538268	0.0843216
PINK1	ENST00000492302.1	0.00125929	0.0302964	0.690948	0.214241	4.40197	0.167296	0.0255722	0.004519	0.0432766	0.0432766
GABRB2	ENST00000393959.5	0.00127188	0.0305349	2.92571	0.907972	3.78447	2.95415	1.1411	-0.658338	0.0955206	0.0955206
MTX1	ENST00000481771.5	0.00128011	0.0306679	0.591674	0.183727	4.65468	0.112148	0.0163652	-0.00746032	0.0342681	0.0342681
CLDN15	ENST00000401528.5	0.00128375	0.0307443	0.686059	0.213089	4.23272	0.1792	0.0162568	0.0312399	0.0518535	0.0518535
GNA12	ENST00000407904.7	0.00130172	0.0311094	4.87351	1.51558	1.74362	7.28919	2.452	-2.24719	0.993498	0.993498
LIAS	ENST00000638430.1	0.00130929	0.0312795	0.650144	0.202289	5.0515	0.13045	0.036183	-0.0316284	0.0251982	0.0251982
GAD1	ENST00000462739.1	0.00131491	0.0313785	3.04054	0.94641	1.52455	2.98307	0.164695	0.0973155	1.17884	1.17884
HHLA3	ENST00000525653.1	0.00132314	0.0315265	2.72277	0.847975	1.91764	2.83858	0.218381	0.549787	0.860211	0.860211
RNFT1	ENST00000477207.2	0.00138207	0.0325635	3.88512	1.21472	1.24941	4.83572	0.773513	-0.389173	1.4398	1.4398
DPYSL2	ENST00000521913.7	0.00139059	0.0326969	1.14163	0.357138	4.70671	0.48072	0.158513	-0.0463543	0.0328082	0.0328082
ZNF195	ENST00000399602.9	0.00139199	0.0327186	3.8324	1.19901	2.40241	6.12552	1.60569	0.54347	0.550748	0.550748
TRA2A	ENST00000490942.1	0.00139644	0.0328004	1.18468	0.370748	4.87751	0.585988	0.0448764	0.161305	0.028669	0.161305
TBX3	ENST00000349155.7	0.00141878	0.0331772	3.2462	1.01736	2.90462	4.40337	0.446931	1.1056	0.320393	1.1056
BMP2K	ENST00000502613.1	0.00141983	0.0331904	0.658503	0.206389	5.4844	0.181203	0.00921636	0.0546783	0.0182714	0.0546783
ATP6V1H	ENST00000359530.7	0.00144749	0.033676	0.642319	0.201669	5.79313	0.165488	0.0458896	0.00625466	0.0151162	0.0151162
STMN2	ENST00000220876.11	0.00144981	0.033707	0.808798	0.253976	5.11656	0.273651	0.00919015	0.0875655	0.024032	0.0875655
TMEM51	ENST00000434578.6	0.00146824	0.0340086	4.2992	1.35157	1.45645	5.67036	1.49956	-1.34279	1.24057	1.24057
SUSD2	ENST00000358321.4	0.00149569	0.0345508	0.683807	0.215337	4.19555	0.152109	0.0154411	-0.000651489	0.0541141	0.0541141
ZNF577	ENST00000638827.1	0.00150135	0.0346464	0.803429	0.253095	3.97076	0.223436	0.0236201	0.0136131	0.0724653	0.0724653
NBPF1	ENST00000420513.1	0.00150288	0.03467	1.82801	0.575909	2.89758	1.0552	0.174491	-0.108592	0.323015	0.323015
ZEB2	ENST00000558170.6	0.00151676	0.0349432	4.03458	1.27215	1.88302	5.28854	1.54168	-1.03521	0.885888	0.885888
TNFRSF11B	ENST00000521597.1	0.00153516	0.0352602	2.50172	0.789695	2.75914	2.49861	0.557256	0.219034	0.378171	0.378171
WDR63	ENST00000294664.11	0.00156766	0.0358743	3.5615	1.1264	1.0876	3.97704	0.29546	-0.0807802	1.60769	1.60769
FAM204A	ENST00000469758.5	0.00157659	0.0360425	3.73248	1.18109	2.04032	5.13615	1.31968	-0.123784	0.772776	0.772776
AP2B1	ENST00000587805.1	0.00158704	0.0362186	0.750264	0.237555	4.08353	0.184787	0.0225473	-0.00265013	0.0621011	0.0621011
H6PD	ENST00000377403.6	0.00158747	0.0362186	0.591377	0.187251	5.31275	0.146994	0.00772452	0.04487	0.0207859	0.04487
KDM4D	ENST00000335080.6	0.00160429	0.0365052	0.754438	0.239115	4.61892	0.18283	0.0504269	-0.0353301	0.0353371	0.0353371
ZNF8-ERVK3-1	ENST00000591325.1	0.00160971	0.0366041	1.21885	0.386428	3.65509	0.513403	0.107545	-0.0228893	0.116444	0.116444
CNBP	ENST00000441626.6	0.00161354	0.0366697	3.98294	1.26304	2.54189	6.67347	1.68891	0.704001	0.478253	0.704001
ALPG	ENST00000295453.8	0.0016181	0.036743	0.969784	0.307612	5.19641	0.395694	0.00627283	0.135665	0.0226703	0.135665
TRABD2A	ENST00000409520.7	0.00162317	0.0368	1.80796	0.573643	4.34021	1.02862	0.447487	-0.387474	0.0461129	0.0461129
UNC93A	ENST00000504706.1	0.00162995	0.0369416	2.91575	0.925489	1.6602	2.82129	0.22313	0.115393	1.06167	1.06167
DOCK8	ENST00000432829.6	0.00166481	0.0375305	3.84982	1.22438	2.44103	6.24525	1.6886	0.560048	0.530074	0.560048
RGMB	ENST00000434027.2	0.00168835	0.0379772	1.57067	0.500182	4.40613	1.04032	0.0297231	0.34555	0.0430962	0.34555
MKS1	ENST00000537529.6	0.00170809	0.038357	3.91872	1.24928	1.26621	4.63302	0.918054	-0.885409	1.42299	1.42299
YIF1B	ENST00000589247.1	0.00172282	0.0386243	0.76085	0.242752	4.78338	0.244382	0.0547881	0.0336044	0.0308388	0.0336044
LTK	ENST00000355166.9	0.00173768	0.0388852	3.51966	1.12387	1.06669	3.71851	0.264418	-0.261801	1.63019	1.63019
BAIAP2	ENST00000575245.5	0.00173786	0.0388852	3.94309	1.25908	1.2784	4.73424	0.967065	-0.879739	1.41086	1.41086
SCRIB	ENST00000356994.7	0.00174104	0.0389182	0.608778	0.194424	5.86601	0.117163	0.0421449	-0.0346698	0.0145564	0.0145564
AMOT	ENST00000371959.7	0.00177776	0.0395582	0.593784	0.190008	5.44596	0.13673	0.0353731	0.00332244	0.0187814	0.0187814
SNHG32	ENST00000375635.6	0.00179127	0.0397425	1.25205	0.400937	3.42825	0.528831	0.0773737	-0.00420047	0.163752	0.163752
SNHG32	ENST00000458514.5	0.00179127	0.0397425	1.25205	0.400937	3.42825	0.528831	0.0773737	-0.00420047	0.163752	0.163752
SNHG32	ENST00000444192.5	0.00179127	0.0397425	1.25205	0.400937	3.42825	0.528831	0.0773737	-0.00420047	0.163752	0.163752
SNHG32	ENST00000421605.5	0.00179127	0.0397425	1.25205	0.400937	3.42825	0.528831	0.0773737	-0.00420047	0.163752	0.163752
SNHG32	ENST00000383384.6	0.00179127	0.0397425	1.25205	0.400937	3.42825	0.528831	0.0773737	-0.00420047	0.163752	0.163752
MCC	ENST00000511847.2	0.00181451	0.04018	3.201	1.02628	2.03056	3.54907	0.800357	-0.206412	0.779524	0.779524
ZNF521	ENST00000361524.8	0.00186056	0.0410534	0.712307	0.228917	5.0165	0.215098	0.0409215	0.0376833	0.0258512	0.0376833
KLF5	ENST00000476859.1	0.00186538	0.0411334	2.65876	0.854668	3.12476	2.17834	0.848849	-0.776803	0.246838	0.246838
UBXN2B	ENST00000523409.5	0.00187689	0.0413414	0.806539	0.259416	4.45438	0.236028	0.0598514	-0.00875601	0.0410939	0.0410939
VAT1L	ENST00000302536.3	0.00188204	0.0414339	0.748977	0.240965	7.53724	0.237967	0.000631484	0.0864646	0.00822355	0.0864646
USP3	ENST00000558157.5	0.00188344	0.0414514	1.10771	0.356402	4.96848	0.402046	0.163753	-0.121326	0.0267809	0.0267809
RACK1	ENST00000502905.5	0.00189401	0.0416171	1.11592	0.359237	3.92083	0.528446	0.112892	0.0806851	0.077882	0.0806851
TAX1BP1	ENST00000433216.6	0.00190125	0.0417494	4.90723	1.58031	2.20311	7.53345	3.07999	-2.69352	0.666062	0.666062
ETV1	ENST00000443137.5	0.00190837	0.0418387	3.39795	1.09465	2.92098	4.90175	1.41486	0.38254	0.31436	0.38254
MFSD11	ENST00000336509.8	0.00191057	0.0418601	0.645488	0.207968	4.87899	0.144397	0.0362389	-0.0119888	0.0286369	0.0286369
GALNT13	ENST00000392825.8	0.00194952	0.0425229	0.639393	0.206401	4.7564	0.173769	0.0168553	0.0470469	0.0315092	0.0470469
SF1	ENST00000334944.9	0.00196084	0.0426746	0.678561	0.219166	5.71988	0.147614	0.0563122	-0.0444616	0.0157387	0.0157387
SPEN	ENST00000471538.1	0.00197487	0.0428708	0.595923	0.192607	4.43167	0.121318	0.0136299	0.00484602	0.0420162	0.0420162
SYT1	ENST00000552744.5	0.00198001	0.042947	3.91598	1.26599	1.26484	4.64517	0.979741	-0.923854	1.42435	1.42435
EIF2A	ENST00000490505.5	0.00198087	0.042947	3.58992	1.16063	2.06314	4.97566	1.26342	0.12334	0.757157	0.757157
QSOX1	ENST00000443059.1	0.00198621	0.043009	3.42735	1.10835	2.11957	4.99815	0.684947	1.15772	0.719445	1.15772
MSI2	ENST00000416426.6	0.00199672	0.0431946	0.737681	0.238676	4.72253	0.187987	0.0530642	-0.0221454	0.0323852	0.0323852
MED1	ENST00000577831.5	0.00201415	0.043544	4.21656	1.3654	2.80853	6.76356	2.43878	-0.651596	0.357717	0.357717
HIRIP3	ENST00000563053.1	0.00202158	0.0436772	3.6567	1.18453	1.1352	4.25017	0.547499	-0.249085	1.55717	1.55717
PHOSPHO2	ENST00000616524.4	0.0020488	0.0441675	4.17258	1.35339	1.39314	5.24295	1.44783	-1.42305	1.29966	1.29966
PPM1A	ENST00000525399.2	0.00207493	0.0446332	3.39597	1.10284	1.00484	3.57662	0.126593	0.019443	1.6978	1.6978
SOCS2	ENST00000549206.5	0.00209814	0.0449905	1.08142	0.351569	5.8599	0.49916	0.0199947	0.165406	0.0146013	0.165406
PNMA2	ENST00000522362.7	0.00210644	0.0451542	0.618713	0.201221	6.83513	0.163429	0.00115596	0.0595786	0.00975572	0.0595786
RHBDD2	ENST00000318622.8	0.0021115	0.0452221	4.85135	1.57814	1.74403	8.47016	2.74264	-0.980778	0.993168	0.993168
API5	ENST00000455725.6	0.00213373	0.0455538	0.771125	0.251102	5.75279	0.234704	0.0791277	-0.00873486	0.0154509	0.0154509
SLC44A2	ENST00000586078.5	0.00214562	0.0457087	0.632006	0.205912	6.19782	0.170709	0.0156879	0.0479119	0.0125372	0.0479119
ZC3H8	ENST00000272570.9	0.00215764	0.0459353	0.610367	0.19897	5.46625	0.159271	0.00796157	0.0514222	0.0185082	0.0514222
RGS6	ENST00000553525.6	0.00216163	0.0459916	3.40754	1.11101	2.08299	4.96461	0.472644	1.37886	0.743744	1.37886
CTCFL	ENST00000423479.7	0.00220074	0.0466641	1.8724	0.611552	2.77825	1.49511	0.190837	0.363351	0.370158	0.370158
TAC1	ENST00000319273.10	0.0022158	0.0469544	1.3742	0.449133	3.73196	0.808593	0.060205	0.242376	0.103499	0.242376
GOLGA2P10	ENST00000614347.4	0.00221957	0.0470051	3.41913	1.11767	2.27876	4.47917	1.25346	-0.0384121	0.620308	0.620308
MAL2	ENST00000522112.6	0.00221901	0.0470051	0.800607	0.261701	4.68068	0.253637	0.0692062	0.00747597	0.0335253	0.0335253
SETD4	ENST00000399212.5	0.00222094	0.0470197	0.966562	0.315976	4.73263	0.313353	0.117641	-0.0762909	0.0321196	0.0321196
RAB10	ENST00000495146.5	0.00222411	0.047043	0.723046	0.236402	5.17043	0.2071	0.0607224	0.00210408	0.0231061	0.0231061
ADAMTS16	ENST00000433402.2	0.0022377	0.0472867	0.89955	0.294286	5.12303	0.346682	0.0579906	0.0719154	0.0239192	0.0719154
RARA	ENST00000475125.1	0.00226757	0.0477705	3.1306	1.0255	1.87764	4.20218	0.680538	0.896943	0.88992	0.896943
REST	ENST00000309042.12	0.00228607	0.0480418	0.678777	0.222527	7.14911	0.197644	0.0471365	0.0271411	0.00888312	0.0271411
ALDH3A2	ENST00000581518.5	0.00229055	0.0481088	1.53467	0.503215	5.64655	0.838394	0.363407	-0.198614	0.0164319	0.0164319
BCL2L1	ENST00000307677.5	0.00229066	0.0481088	0.655433	0.214917	7.35726	0.184305	0.00676147	0.0625223	0.0084761	0.0625223
WLS	ENST00000491076.1	0.00231689	0.048496	3.81976	1.25391	1.21673	4.54844	0.885597	-0.671521	1.47283	1.47283
IDH1	ENST00000415282.5	0.0023283	0.0487051	1.15167	0.37824	3.76458	0.473555	0.116137	-0.0215708	0.098462	0.098462
HUS1	ENST00000458191.5	0.00233262	0.0487804	0.69918	0.229672	4.65574	0.191419	0.0448867	0.0110672	0.0342374	0.0342374
ADAL	ENST00000428046.7	0.00234016	0.0488784	0.604748	0.198716	5.17807	0.157102	0.029669	0.029563	0.0229772	0.029563
RCC1	ENST00000419074.5	0.00236888	0.0492978	3.79869	1.24973	1.2062	4.54302	0.859156	-0.591639	1.48358	1.48358
GPCPD1	ENST00000379019.5	0.00237346	0.0493622	0.645584	0.212431	5.68115	0.179186	0.00500742	0.0626832	0.0160954	0.0626832
FAM122B	ENST00000493333.5	0.00237414	0.0493622	3.80169	1.25099	1.74374	4.73923	1.35408	-0.849864	0.993397	0.993397
SAP18	ENST00000621421.4	0.00237686	0.0493887	0.780745	0.256943	6.38222	0.262093	0.0812955	0.0177341	0.011634	0.0177341
TRIM16L	ENST00000571708.5	0.00239085	0.0496121	0.925135	0.304639	3.94074	0.30263	0.0635494	-0.00621541	0.075658	0.075658
MFSD1	ENST00000484166.5	0.00239955	0.0496493	4.32485	1.42465	1.46928	5.79579	1.81565	-1.58504	1.22879	1.22879
NUP107	ENST00000229179.9	0.00241371	0.0498608	0.608155	0.20045	4.60477	0.145387	0.024494	0.0185445	0.0357762	0.0357762
MYF6	ENST00000228641.4	0.00241488	0.0498608	3.00604	0.990845	1.32149	3.02593	0.104191	0.289631	1.36847	1.36847

## Sheet: M v CM, M up
ext_gene	target_id	pval	qval	b	se_b	mean_obs	var_obs	tech_var	sigma_sq	smooth_sigma_sq	final_sigma_sq
NKD1	ENST00000268459.6	1.21173e-101	7.74242e-98	-2.43736	0.113871	7.71436	1.79777	0.000838857	0.018611	0.00954479	0.018611
COL14A1	ENST00000309791.8	1.1547e-83	3.25967e-80	-2.375	0.122554	6.21684	1.71021	0.00642868	0.0161004	0.014421	0.0161004
FGF19	ENST00000294312.4	6.53261e-72	1.48111e-68	-4.01694	0.223999	4.72606	4.86854	0.0402066	-0.00547714	0.0350567	0.0350567
AXIN2	ENST00000307078.10	4.77121e-63	9.06336e-60	-2.96592	0.176962	6.71182	2.66439	0.0349808	-0.00325271	0.0119927	0.0119927
RIMS4	ENST00000372851.7	6.38708e-49	7.35928e-46	-1.35296	0.092034	6.84397	0.556	0.00123571	0.00732928	0.0114697	0.0114697
F2RL1	ENST00000296677.5	3.10908e-44	2.95299e-41	-1.57347	0.112787	7.48904	0.758011	0.000778494	0.0183029	0.0098169	0.0183029
ZDHHC22	ENST00000319374.4	3.65704e-42	3.13457e-39	-1.73574	0.127566	5.55968	0.908131	0.0045799	0.000787359	0.0198296	0.0198296
FST	ENST00000504226.5	1.10195e-41	9.22029e-39	-2.0331	0.150313	5.66578	1.25588	0.0153011	0.00448493	0.01859	0.01859
DPYSL3	ENST00000343218.10	1.13779e-41	9.40815e-39	-1.28505	0.0950245	8.05806	0.505106	0.00414147	0.00797922	0.00940301	0.00940301
NODAL	ENST00000287139.7	4.83175e-40	3.77333e-37	-4.85335	0.366433	6.17294	7.22764	0.0507057	0.150704	0.0146665	0.150704
STOX2	ENST00000308497.9	5.92769e-40	4.57833e-37	-1.70381	0.128789	7.47522	0.890793	0.000761629	0.0241181	0.00983837	0.0241181
NEFL	ENST00000610854.1	6.44361e-40	4.9227e-37	-2.43811	0.18438	5.85257	1.8241	0.0207684	0.0302258	0.0168362	0.0302258
ARFGEF1	ENST00000262215.8	2.712e-39	2.0278e-36	-1.07663	0.0820935	8.63321	0.355398	0.000202019	0.00936833	0.00990699	0.00990699
CNMD	ENST00000377962.8	1.23735e-38	8.87419e-36	-2.63305	0.202556	6.08666	2.12912	0.0105817	0.0509614	0.0151773	0.0509614
FOXB1	ENST00000396057.6	8.0482e-38	5.49192e-35	-4.65929	0.362446	5.24408	6.67034	0.0257296	0.171321	0.0246388	0.171321
RBP1	ENST00000619087.4	5.25095e-36	3.3591e-33	-1.71261	0.136703	6.36775	0.902331	0.00509154	0.02294	0.0136306	0.02294
SLCO4C1	ENST00000310954.7	2.2342e-34	1.30859e-31	-1.90073	0.155455	5.87201	1.11283	0.00392113	0.0323284	0.0166791	0.0323284
ALPG	ENST00000295453.8	2.29347e-34	1.3322e-31	-2.46432	0.201585	4.51644	1.8651	0.0192558	0.0347843	0.0416991	0.0416991
HHLA1	ENST00000414222.1	5.81228e-34	3.29449e-31	-1.91527	0.15765	5.61862	1.1303	0.00487082	0.0324092	0.0191157	0.0324092
SYPL2	ENST00000369872.4	6.66708e-34	3.74877e-31	-2.63012	0.21669	4.35866	2.10807	0.0218856	0.0191343	0.048546	0.048546
ADAMTS16	ENST00000274181.7	4.66755e-33	2.54309e-30	-2.02727	0.169258	5.43784	1.26733	0.0170708	0.0259016	0.0215371	0.0259016
ALDH3A2	ENST00000582991.5	1.092e-32	5.8145e-30	-1.78447	0.149871	6.11781	0.982256	0.0101341	0.023558	0.014988	0.023558
FST	ENST00000256759.8	1.32623e-32	7.00858e-30	-1.9535	0.164291	7.62129	1.17724	0.00172701	0.0387604	0.0096396	0.0387604
CEBPZOS	ENST00000402297.6	1.8907e-32	9.84356e-30	-1.08489	0.0914684	6.95615	0.356616	0.00147035	0.00292799	0.0110794	0.0110794
FERMT1	ENST00000217289.8	2.12405e-32	1.0897e-29	-2.11391	0.178373	5.61497	1.37535	0.0285672	0.0148861	0.0191581	0.0191581
BAG2	ENST00000370693.5	1.94069e-31	9.34255e-29	-1.15592	0.0990993	6.60839	0.41263	0.00161506	0.0131159	0.0124529	0.0131159
ADAMTS19	ENST00000274487.9	8.99283e-31	4.05167e-28	-1.5274	0.132437	7.6461	0.720935	0.000672304	0.0256372	0.00961193	0.0256372
ALDH3A2	ENST00000579855.5	8.12925e-30	3.57103e-27	-1.76521	0.155635	7.21686	0.956669	0.0259869	0.00136558	0.0103464	0.0103464
PREX2	ENST00000288368.5	8.77642e-30	3.83137e-27	-1.61744	0.142691	7.0955	0.809271	0.00128369	0.0292575	0.0106585	0.0292575
NPM3	ENST00000370110.5	9.44322e-30	4.07188e-27	-1.00852	0.0890224	7.15214	0.314645	0.00132327	0.0105642	0.0105068	0.0105642
DACT1	ENST00000395153.7	1.18674e-29	5.05517e-27	-1.468	0.12981	6.60999	0.666724	0.00199481	0.0232811	0.0124454	0.0232811
LCK	ENST00000619559.4	1.97078e-29	8.19625e-27	-1.50658	0.133749	6.1022	0.70227	0.011751	0.0149207	0.0150821	0.0150821
NKX1-2	ENST00000451024.5	6.18581e-29	2.51312e-26	-1.96931	0.176414	7.35199	1.2008	0.0010552	0.0456275	0.010055	0.0456275
SEMA3C	ENST00000265361.8	6.54129e-29	2.64227e-26	-2.87982	0.258093	5.38637	2.56794	0.0183232	0.081595	0.0223516	0.081595
CDCA7L	ENST00000406877.8	1.51235e-28	6.07404e-26	-1.14895	0.103665	7.73473	0.40892	0.00107918	0.0150405	0.00952728	0.0150405
DCLK1	ENST00000255448.8	1.55195e-28	6.19767e-26	-2.22549	0.200839	5.75428	1.52507	0.0428048	0.00624276	0.0176995	0.0176995
CCNA1	ENST00000255465.7	1.81277e-28	7.19835e-26	-6.47344	0.58493	2.54357	12.6266	0.00618949	0.062539	0.507024	0.507024
LMO7	ENST00000526202.5	3.11047e-28	1.22134e-25	-1.86051	0.168853	5.91753	1.07266	0.0144867	0.0282801	0.0163266	0.0282801
MMP16	ENST00000286614.11	3.59772e-28	1.38937e-25	-1.16376	0.105745	6.73322	0.419723	0.0013772	0.0153957	0.0119031	0.0153957
FGF18	ENST00000274625.6	3.8809e-28	1.49054e-25	-3.94756	0.358914	3.87504	4.82954	0.0901925	0.103037	0.0909253	0.103037
GOT1	ENST00000370508.7	4.47024e-28	1.70756e-25	-0.933331	0.0849576	7.32831	0.268459	0.000724738	0.00818451	0.0101019	0.0101019
DOP1B	ENST00000399151.3	7.75197e-28	2.91362e-25	-1.24875	0.114186	5.95411	0.478044	0.00349972	0.00929278	0.0160581	0.0160581
SLC25A4	ENST00000491736.1	1.5134e-27	5.51137e-25	-1.14518	0.105302	6.63709	0.406736	0.00164123	0.0149915	0.0123206	0.0149915
DPPA4	ENST00000335658.6	2.08381e-27	7.54953e-25	-0.893279	0.0823603	8.51941	0.245915	0.000444755	0.00771898	0.00973008	0.00973008
SERINC5	ENST00000507668.7	2.75647e-27	9.93531e-25	-1.02204	0.0944552	8.67239	0.324077	0.000221289	0.0131614	0.0099773	0.0131614
DAZL	ENST00000399444.6	3.41096e-27	1.22316e-24	-2.38535	0.220848	4.35464	1.75553	0.0244133	0.0362988	0.0487477	0.0487477
VSNL1	ENST00000295156.8	7.47957e-27	2.61543e-24	-2.46685	0.229934	5.46732	1.88905	0.0153904	0.0639141	0.0210924	0.0639141
FST	ENST00000396947.7	1.87011e-26	6.47491e-24	-1.87005	0.175699	6.16167	1.08618	0.0177696	0.0285358	0.0147309	0.0285358
CEMIP2	ENST00000377044.9	2.56156e-26	8.82547e-24	-0.898085	0.0846122	8.09655	0.248552	0.00133146	0.00690038	0.00940736	0.00940736
ZYG11A	ENST00000371528.1	7.83347e-26	2.60936e-23	-1.57473	0.149843	5.12924	0.752959	0.00711409	0.00416541	0.0265653	0.0265653
EIF4EBP1	ENST00000338825.5	1.63621e-25	5.42458e-23	-0.962401	0.0921881	7.32051	0.288063	0.00207506	0.0106729	0.0101178	0.0106729
NQO2	ENST00000338130.6	4.93253e-25	1.60501e-22	-1.63164	0.157887	5.72125	0.828589	0.0156801	0.0217122	0.0180182	0.0217122
ACACA	ENST00000614428.4	8.52845e-25	2.74964e-22	-0.867259	0.0843504	8.43505	0.230915	0.00104807	0.00554455	0.00962442	0.00962442
SALL3	ENST00000537592.6	9.02407e-25	2.88298e-22	-0.974673	0.0948479	6.55555	0.287714	0.000787958	0.0026085	0.0127062	0.0127062
SALL3	ENST00000614883.4	9.02407e-25	2.88298e-22	-0.974673	0.0948479	6.55555	0.287714	0.000787958	0.0026085	0.0127062	0.0127062
CKMT1A	ENST00000434505.5	1.09421e-24	3.44873e-22	-1.3688	0.133443	5.9217	0.565743	0.010415	-0.00583737	0.0162954	0.0162954
PAK1	ENST00000356341.7	1.19016e-24	3.7344e-22	-0.88377	0.0862261	8.00724	0.242151	0.00174892	0.00804591	0.0094035	0.0094035
SLC3A2	ENST00000377890.6	1.2576e-24	3.92848e-22	-1.60936	0.157101	6.27076	0.802217	0.0228906	0.00861691	0.0141304	0.0141304
TES	ENST00000358204.9	2.36853e-24	7.20658e-22	-0.917091	0.0900635	6.98694	0.257227	0.00118674	0.0049507	0.0109804	0.0109804
CLDN1	ENST00000295522.4	2.45745e-24	7.44492e-22	-1.71581	0.168562	4.82338	0.895509	0.00999286	0.00538996	0.0326267	0.0326267
IDH3A	ENST00000558535.1	4.23493e-24	1.26124e-21	-1.12481	0.111081	6.26109	0.381413	0.00432688	-0.00201298	0.0141817	0.0141817
TBC1D4	ENST00000377625.6	6.84168e-24	1.9953e-21	-0.951207	0.0943751	6.78834	0.277243	0.00167876	0.00557733	0.0116812	0.0116812
ZNF589	ENST00000354698.8	1.11625e-23	3.20228e-21	-1.03744	0.103425	7.43143	0.335718	0.00262216	0.013423	0.00991012	0.013423
ADD2	ENST00000264436.9	1.57655e-23	4.48614e-21	-1.09165	0.109202	7.87573	0.371823	0.000700939	0.0171867	0.0094377	0.0171867
SLC47A1	ENST00000270570.8	4.32164e-23	1.20534e-20	-1.86134	0.188086	5.12366	1.04794	0.0264023	-0.0157021	0.026662	0.026662
PCSK1	ENST00000311106.8	7.91064e-23	2.13026e-20	-5.49211	0.558392	4.4104	9.42314	0.189785	0.277917	0.0460799	0.277917
ADD2	ENST00000413157.6	1.10674e-22	2.92434e-20	-1.13705	0.116005	6.00469	0.393171	0.00447951	0.00215717	0.0157061	0.0157061
PRR15	ENST00000319694.3	1.43402e-22	3.73296e-20	-1.90254	0.194622	4.53592	1.12618	0.0158369	0.0345243	0.0409799	0.0409799
GSTO1	ENST00000470554.5	1.79044e-22	4.60956e-20	-2.11635	0.216994	4.46111	1.39995	0.0267492	0.0435857	0.0438807	0.0438807
CDX2	ENST00000381020.7	1.87565e-22	4.81132e-20	-4.53021	0.464718	4.26945	6.416	0.0966723	0.227272	0.0534088	0.227272
IGFBPL1	ENST00000377694.2	1.99056e-22	5.08752e-20	-0.912269	0.0936403	7.65656	0.260192	0.000466846	0.0126859	0.00960079	0.0126859
PPIA	ENST00000489459.5	3.20761e-22	8.1096e-20	-1.20312	0.124114	6.98172	0.452734	0.00749648	0.0156099	0.010997	0.0156099
MOB3B	ENST00000262244.6	3.32286e-22	8.37086e-20	-0.910956	0.0940092	6.71591	0.254091	0.00128119	0.00514268	0.0119754	0.0119754
RRP12	ENST00000370992.8	6.00186e-22	1.47497e-19	-1.03289	0.107263	7.20792	0.333863	0.00371334	0.0135446	0.0103678	0.0135446
DPPA2	ENST00000478945.1	7.20264e-22	1.76389e-19	-1.58284	0.164695	5.16178	0.784164	0.00730795	0.0333786	0.0260082	0.0333786
SEMA3C	ENST00000419255.6	9.92294e-22	2.38847e-19	-2.95886	0.308932	5.15726	2.74098	0.0355883	0.10757	0.0260849	0.10757
GABRP	ENST00000521481.5	1.22133e-21	2.92973e-19	-1.22832	0.128536	7.36218	0.472454	0.000683353	0.0240988	0.0100354	0.0240988
ZIC2	ENST00000376335.8	1.47498e-21	3.50233e-19	-0.769745	0.0807143	8.04596	0.183875	0.000369718	0.00728305	0.00940248	0.00940248
INTS13	ENST00000261191.12	1.50789e-21	3.56841e-19	-0.814447	0.0854222	7.41289	0.204206	0.0010032	0.00550807	0.00994223	0.00994223
PCNX2	ENST00000258229.14	1.95128e-21	4.55634e-19	-0.849815	0.0893828	7.03492	0.223392	0.00115086	0.00726913	0.0108331	0.0108331
HHLA1	ENST00000473291.1	4.93615e-21	1.13378e-18	-1.4539	0.154497	9.40454	0.662791	0.000104621	0.0356994	0.0123233	0.0356994
RPL37	ENST00000274242.10	5.16842e-21	1.18326e-18	-0.841708	0.0894892	8.17155	0.222152	0.000335932	0.0116765	0.00942762	0.0116765
URB1	ENST00000382751.4	6.19829e-21	1.41444e-18	-0.908423	0.096779	7.53383	0.258809	0.000577632	0.0134716	0.00975117	0.0134716
CNIH3	ENST00000272133.4	8.40611e-21	1.89367e-18	-1.98621	0.212328	5.63989	1.2376	0.00634942	0.0612755	0.0188739	0.0612755
SCGB3A2	ENST00000504320.5	1.93021e-20	4.23952e-18	-1.4859	0.160359	7.44517	0.693231	0.000763079	0.0378093	0.00988699	0.0378093
ETV1	ENST00000430479.6	3.2049e-20	6.95236e-18	-1.46536	0.159073	5.50246	0.672463	0.0173668	0.0179787	0.0205897	0.0205897
MAPK13	ENST00000211287.9	3.47916e-20	7.52409e-18	-1.23336	0.134017	5.49997	0.475408	0.00631639	0.017499	0.0206243	0.0206243
HSPA9	ENST00000507097.5	3.80749e-20	8.20887e-18	-0.779603	0.0848006	8.0417	0.188983	0.00138433	0.00692642	0.00940239	0.00940239
ECPAS	ENST00000338205.9	4.41155e-20	9.48214e-18	-0.750743	0.0818024	8.46053	0.172904	0.000383352	0.00439095	0.0096541	0.0096541
MOCOS	ENST00000261326.6	4.51236e-20	9.63986e-18	-1.06082	0.11562	5.90577	0.353601	0.00363613	0.0163645	0.0164157	0.0164157
GPI	ENST00000356487.11	5.19871e-20	1.1039e-17	-0.847548	0.0925289	8.04116	0.221086	0.00344002	0.00354083	0.00940238	0.00940238
POU5F1	ENST00000383524.4	5.99121e-20	1.26076e-17	-0.766234	0.0837919	8.87759	0.183926	0.000103137	0.00963572	0.0104285	0.0104285
POU5F1	ENST00000437747.6	5.99121e-20	1.26076e-17	-0.766234	0.0837919	8.87759	0.183926	0.000103137	0.00963572	0.0104285	0.0104285
MKX	ENST00000419761.6	9.68319e-20	2.01953e-17	-2.86762	0.315384	4.001	2.54957	0.073799	0.0294623	0.0754018	0.0754018
UTP4	ENST00000314423.12	9.90958e-20	2.06064e-17	-0.914278	0.100581	7.54584	0.262911	0.00306945	0.0121055	0.00973455	0.0121055
SOX8	ENST00000293894.4	1.44034e-19	2.96876e-17	-1.49433	0.165134	4.94603	0.688508	0.010935	0.0123183	0.0299688	0.0299688
SP5	ENST00000375281.3	1.46344e-19	3.00754e-17	-1.91455	0.211612	7.34191	1.15339	0.000859218	0.0663104	0.0100748	0.0663104
CYCS	ENST00000305786.6	2.38915e-19	4.83924e-17	-0.746269	0.0829764	7.61447	0.174331	0.000680106	0.0083891	0.00964751	0.00964751
NRK	ENST00000243300.14	3.17053e-19	6.34874e-17	-1.5501	0.172951	4.83008	0.743067	0.0123972	0.015387	0.032471	0.032471
ATP2A3	ENST00000397041.8	3.19358e-19	6.37672e-17	-1.51979	0.169585	5.441	0.719296	0.0216501	0.0113083	0.0214885	0.0214885
FAM167A	ENST00000284486.9	3.40271e-19	6.75592e-17	-2.22902	0.248918	6.29141	1.56491	0.00272856	0.090212	0.0140218	0.090212
ACOXL	ENST00000439055.5	3.66221e-19	7.21003e-17	-1.60328	0.179203	4.88696	0.792425	0.0169701	0.00962096	0.0312006	0.0312006
DPYSL3	ENST00000398514.7	4.43504e-19	8.63482e-17	-1.58421	0.177492	8.79318	0.790723	0.0014353	0.0458198	0.0102256	0.0458198
ADD2	ENST00000407644.6	5.57271e-19	1.079e-16	-1.35793	0.152572	6.44683	0.581126	0.00721794	0.0276995	0.0132376	0.0276995
BOP1	ENST00000569669.6	6.93922e-19	1.33623e-16	-0.851084	0.0958875	6.51139	0.225099	0.000870022	0.0088749	0.0129216	0.0129216
BOP1	ENST00000642409.2	6.93922e-19	1.33623e-16	-0.851084	0.0958875	6.51139	0.225099	0.000870022	0.0088749	0.0129216	0.0129216
AEN	ENST00000332810.4	7.91497e-19	1.51169e-16	-0.795175	0.0897366	7.89708	0.199354	0.000402909	0.0116761	0.00942892	0.0116761
ASNS	ENST00000394308.8	8.93771e-19	1.7024e-16	-1.29312	0.146154	7.23367	0.527284	0.00581715	0.0262245	0.010307	0.0262245
FAM102B	ENST00000370035.8	1.39501e-18	2.61461e-16	-0.805113	0.0915128	6.85942	0.198846	0.00114884	0.00433058	0.0114131	0.0114131
ABHD12B	ENST00000554566.5	2.22706e-18	4.14098e-16	-1.33144	0.152248	7.81804	0.559632	0.000505988	0.0342634	0.00946771	0.0342634
EFEMP1	ENST00000355426.8	2.4608e-18	4.56353e-16	-2.34854	0.2689	6.03013	1.74146	0.0133908	0.0950698	0.0155368	0.0950698
LARP7	ENST00000324052.10	3.05048e-18	5.62738e-16	-6.26835	0.719708	2.44175	11.7902	0.216868	-0.213674	0.560103	0.560103
A2ML1	ENST00000299698.12	3.20121e-18	5.8746e-16	-1.58609	0.182224	4.87314	0.765924	0.018307	-0.00428467	0.0315012	0.0315012
SLC35F1	ENST00000621341.1	5.39229e-18	9.76797e-16	-1.2557	0.145256	6.09586	0.495344	0.0165283	0.011355	0.0151208	0.0151208
GPR160	ENST00000355897.10	5.68151e-18	1.02147e-15	-1.2617	0.146051	5.28708	0.493042	0.00805615	0.0112849	0.0239403	0.0239403
SLC2A1	ENST00000630287.2	5.68252e-18	1.02147e-15	-0.74413	0.0861385	7.38694	0.173834	0.00114084	0.00850378	0.00998891	0.00998891
LRRK1	ENST00000526457.3	6.74631e-18	1.19437e-15	-1.35951	0.157732	11.3068	0.582795	1.66306e-05	0.0353784	0.0373022	0.0373022
IGFBP2	ENST00000456764.1	6.93189e-18	1.22414e-15	-0.92806	0.107713	6.3946	0.268763	0.00390712	0.00906105	0.0134961	0.0134961
SCGB3A2	ENST00000507160.5	9.66344e-18	1.67289e-15	-1.39359	0.162463	8.35417	0.614299	0.000310045	0.0392813	0.00954285	0.0392813
GUCY2C	ENST00000261170.5	9.73502e-18	1.67967e-15	-1.27162	0.148259	5.15161	0.492551	0.00678981	0.00251881	0.0261811	0.0261811
GNAO1	ENST00000262494.12	1.27829e-17	2.19669e-15	-0.939005	0.109881	6.09397	0.274716	0.0029785	0.00976788	0.0151323	0.0151323
MATR3	ENST00000502394.1	1.3333e-17	2.28564e-15	-1.45181	0.169985	4.85887	0.641561	0.0115258	2.23097e-05	0.0318168	0.0318168
PLAAT3	ENST00000415826.1	1.50252e-17	2.56117e-15	-0.93426	0.109566	6.46754	0.270912	0.00487098	0.00645347	0.0131359	0.0131359
TSPAN5	ENST00000305798.8	1.66421e-17	2.81853e-15	-0.840936	0.0987579	6.86463	0.214206	0.00323549	-0.000667311	0.0113942	0.0113942
DST	ENST00000340834.10	1.69779e-17	2.86849e-15	-1.08372	0.127305	6.40975	0.36409	0.0108891	0.00380441	0.0134207	0.0134207
NA	ENST00000640789.2	1.80534e-17	3.0356e-15	-1.50592	0.177048	7.76095	0.71795	0.00153763	0.0454815	0.00950645	0.0454815
CCDC169	ENST00000379864.6	2.00236e-17	3.3429e-15	-1.10612	0.130229	6.13207	0.387399	0.00263371	0.0228055	0.0149032	0.0228055
GRB14	ENST00000488342.5	2.27737e-17	3.78404e-15	-1.81577	0.214156	6.06928	1.04414	0.00918836	0.0596061	0.0152855	0.0596061
AC100868.1	ENST00000262283.5	2.51588e-17	4.14119e-15	-1.09613	0.129458	5.52336	0.373971	0.00483514	0.0120634	0.0203039	0.0203039
CDH3	ENST00000542274.5	2.5635e-17	4.2097e-15	-0.72515	0.0856654	7.74278	0.165554	0.00148716	0.00826465	0.00952068	0.00952068
ARFGEF3	ENST00000251691.5	3.30717e-17	5.38066e-15	-1.27186	0.15078	7.00289	0.512567	0.00123233	0.0328696	0.0109305	0.0328696
ASNS	ENST00000455086.5	3.31513e-17	5.38116e-15	-1.0601	0.125681	7.59691	0.3561	0.0108079	0.0128855	0.00966849	0.0128855
PIP4K2A	ENST00000376573.9	3.61524e-17	5.85477e-15	-0.802542	0.09526	6.72054	0.200938	0.00165576	0.00798926	0.0119559	0.0119559
ST8SIA3	ENST00000324000.4	5.04192e-17	8.03564e-15	-1.53992	0.183636	4.79341	0.751871	0.0106452	0.039938	0.0333404	0.039938
UGT8	ENST00000310836.11	5.75094e-17	9.1449e-15	-0.881372	0.105299	6.41389	0.241576	0.00323147	0.007432	0.0134002	0.0134002
SP8	ENST00000617581.4	6.00389e-17	9.52559e-15	-0.939492	0.11231	5.9652	0.269147	0.00294139	0.00250036	0.015979	0.015979
ABHD17B	ENST00000377041.6	6.44057e-17	1.01725e-14	-0.91731	0.109767	6.23166	0.266781	0.00373318	0.0141973	0.0143401	0.0143401
TXLNG	ENST00000380122.10	8.59797e-17	1.34291e-14	-0.729592	0.0876629	7.35943	0.168913	0.000853642	0.0106735	0.0100406	0.0106735
PYGL	ENST00000216392.8	9.97613e-17	1.54784e-14	-1.54295	0.185784	7.54338	0.755624	0.000808901	0.0509645	0.00973793	0.0509645
NA	ENST00000639516.1	1.06817e-16	1.65367e-14	-1.1451	0.138015	7.8084	0.416234	0.000403817	0.0281682	0.00947361	0.0281682
TRIM25	ENST00000316881.9	1.18135e-16	1.82082e-14	-0.744348	0.0898431	6.99523	0.170138	0.00115331	0.00374911	0.0109544	0.0109544
SORL1	ENST00000260197.12	1.23734e-16	1.89176e-14	-0.737305	0.0890523	8.32168	0.172602	0.000325411	0.0115701	0.00951542	0.0115701
GABRP	ENST00000519196.5	1.23812e-16	1.89176e-14	-1.2385	0.149589	8.05707	0.487018	0.000419559	0.0331456	0.00940295	0.0331456
IQCB1	ENST00000310864.11	1.24101e-16	1.89206e-14	-0.750375	0.0906347	7.25979	0.17572	0.00207439	0.0064269	0.0102476	0.0102476
LY75	ENST00000263636.5	1.49502e-16	2.25005e-14	-1.42471	0.172548	5.2551	0.614093	0.0202001	-0.0137572	0.0244589	0.0244589
CDX1	ENST00000231656.12	1.72418e-16	2.57291e-14	-5.74037	0.69666	2.17704	10.0405	0.0148646	0.178803	0.713137	0.713137
SALL3	ENST00000614625.1	2.58957e-16	3.79975e-14	-1.02655	0.125325	5.79418	0.318911	0.0062252	-0.00276087	0.0173345	0.0173345
PFKFB2	ENST00000367080.8	2.85625e-16	4.17363e-14	-0.845376	0.103356	6.32666	0.227217	0.00195857	0.0140652	0.0138394	0.0140652
PREX2	ENST00000517617.1	2.91812e-16	4.25519e-14	-1.78755	0.218616	5.50645	1.01595	0.0185774	0.053112	0.0205343	0.053112
PEBP1	ENST00000261313.3	3.09017e-16	4.48745e-14	-0.682886	0.0835871	8.83442	0.143314	0.000158576	0.00410846	0.0103216	0.0103216
ATXN7L1	ENST00000419735.7	3.36103e-16	4.86069e-14	-0.888527	0.108893	6.2083	0.239342	0.00331853	-0.000196287	0.0144681	0.0144681
ADAMTS20	ENST00000389420.7	3.69198e-16	5.32835e-14	-1.73418	0.212828	4.78361	0.955256	0.0343635	0.0319396	0.0335802	0.0335802
GSTT2B	ENST00000290765.8	4.55673e-16	6.54949e-14	-1.39212	0.171385	5.04066	0.60953	0.0159138	0.0192517	0.0281453	0.0281453
ACAP1	ENST00000158762.8	4.68395e-16	6.7186e-14	-1.21345	0.14945	5.42332	0.46854	0.00613104	0.027372	0.0217643	0.027372
AC126177.5	ENST00000550420.2	4.78555e-16	6.83643e-14	-1.69866	0.209276	4.45734	0.918189	0.0182134	0.0474815	0.0440374	0.0474815
C13orf42	ENST00000569306.1	6.08855e-16	8.6802e-14	-1.38899	0.171745	7.94428	0.614187	0.000451104	0.0437934	0.00941395	0.0437934
SMARCA2	ENST00000382203.5	6.39683e-16	9.08285e-14	-6.0086	0.7435	2.31115	10.895	0.196943	-0.116946	0.632245	0.632245
DCLK1	ENST00000360631.7	7.30264e-16	1.03481e-13	-7.02107	0.870523	2.81739	14.8261	0.758231	-0.711396	0.378485	0.378485
EPRS1	ENST00000366923.8	7.93673e-16	1.12015e-13	-0.741546	0.0920584	9.14141	0.175137	0.000131862	0.0125803	0.0112321	0.0125803
ZFP64	ENST00000371523.8	8.04857e-16	1.13366e-13	-1.92304	0.238785	4.82368	1.17288	0.0529074	0.0264034	0.0326197	0.0326197
PLBD1	ENST00000240617.10	8.38333e-16	1.17845e-13	-1.35504	0.16836	5.96735	0.584853	0.00351379	0.0390037	0.0159638	0.0390037
CLDN7	ENST00000360325.11	8.6024e-16	1.20683e-13	-0.787182	0.0978436	7.05244	0.192181	0.00357878	0.00427632	0.0107813	0.0107813
EIF4A2	ENST00000425053.5	9.92125e-16	1.38082e-13	-1.23866	0.154296	7.18245	0.488855	0.00721875	0.0284922	0.01043	0.0284922
SLC3A2	ENST00000535296.5	1.03212e-15	1.43082e-13	-1.0371	0.129266	6.97076	0.342722	0.0095251	0.0155393	0.011032	0.0155393
MTHFD1L	ENST00000618312.4	1.0884e-15	1.49769e-13	-0.686952	0.0856927	7.67637	0.148973	0.00143431	0.00781853	0.00958054	0.00958054
ABHD17B	ENST00000333421.6	1.08888e-15	1.49769e-13	-0.972375	0.121298	6.9698	0.30131	0.00138546	0.0206844	0.0110351	0.0206844
GSTO1	ENST00000539281.5	1.12955e-15	1.5506e-13	-3.75352	0.468494	5.87772	4.25539	0.312596	-0.276708	0.0166337	0.0166337
GGCT	ENST00000275428.9	1.64534e-15	2.22818e-13	-0.701372	0.088051	7.29706	0.151417	0.00146292	0.00333715	0.0101665	0.0101665
UTP6	ENST00000261708.9	1.68331e-15	2.27521e-13	-0.963681	0.121025	6.47613	0.296181	0.00632306	0.0156473	0.0130939	0.0156473
BUB1	ENST00000302759.10	1.9213e-15	2.57707e-13	-0.664909	0.0836751	8.32174	0.134567	0.000986805	0.00143242	0.00951547	0.00951547
MARS1	ENST00000262027.10	2.20236e-15	2.94283e-13	-0.665352	0.0839097	8.84778	0.137552	0.000207253	0.00572311	0.010354	0.010354
MAOB	ENST00000378069.5	2.21042e-15	2.94799e-13	-3.00244	0.378669	3.61052	2.85054	0.0786151	0.104076	0.13647	0.13647
EPB41L5	ENST00000443124.5	2.32155e-15	3.09035e-13	-1.34713	0.170031	6.19304	0.579121	0.00596623	0.0373997	0.014553	0.0373997
PMM2	ENST00000562025.1	2.49546e-15	3.30931e-13	-1.36022	0.171878	7.3598	0.590509	0.000691223	0.043622	0.0100399	0.043622
ARG2	ENST00000261783.4	2.5537e-15	3.38017e-13	-0.767635	0.0970341	7.14989	0.188078	0.000977153	0.0131463	0.0105126	0.0131463
FA2H	ENST00000219368.8	2.99997e-15	3.94118e-13	-1.51709	0.192258	4.66336	0.720795	0.0186294	0.0192804	0.0368151	0.0368151
CDH3	ENST00000429102.6	3.07984e-15	4.03856e-13	-0.701843	0.0889802	7.4741	0.151975	0.00203609	0.00321418	0.00984012	0.00984012
TSSC2	ENST00000526284.5	3.13209e-15	4.09942e-13	-1.03849	0.131695	5.94692	0.344348	0.00429595	0.0217195	0.0161098	0.0217195
AL135905.2	ENST00000370651.6	3.64666e-15	4.7464e-13	-0.687722	0.087424	7.25591	0.146255	0.00120816	0.00425035	0.0102563	0.0102563
MRPS18B	ENST00000259873.5	3.7486e-15	4.87006e-13	-0.675018	0.0858467	7.27712	0.138303	0.000845136	0.00116562	0.0102093	0.0102093
CCDC86	ENST00000227520.10	3.8803e-15	5.02259e-13	-0.867143	0.110341	6.99128	0.240191	0.000848403	0.0174144	0.0109667	0.0174144
RPL41	ENST00000358888.7	4.10203e-15	5.29983e-13	-0.943564	0.120172	6.06271	0.278185	0.00633504	0.00752941	0.015327	0.015327
ECHDC2	ENST00000539680.1	5.46525e-15	6.93367e-13	-1.35396	0.173235	4.83251	0.556988	0.012601	-0.00381705	0.0324148	0.0324148
C9orf85	ENST00000334731.7	5.49387e-15	6.95742e-13	-1.05142	0.134538	5.46418	0.352095	0.00601195	0.0195488	0.0211388	0.0211388
SEPTIN6	ENST00000394610.6	5.90946e-15	7.45684e-13	-1.17872	0.151004	5.5939	0.430937	0.0147965	0.00285716	0.019407	0.019407
ATP8A2	ENST00000381655.7	6.38418e-15	8.02705e-13	-0.9812	0.125857	6.04163	0.307834	0.00317255	0.0205876	0.0154619	0.0205876
STOX2	ENST00000506529.1	7.27836e-15	9.13499e-13	-1.69627	0.218042	4.45246	0.905191	0.027072	0.0254186	0.0442415	0.0442415
CCNB1IP1	ENST00000358932.9	7.73177e-15	9.66026e-13	-0.636733	0.0819276	8.51965	0.127277	0.000337773	0.00672226	0.00973042	0.00973042
PHGDH	ENST00000369409.9	8.6966e-15	1.08376e-12	-0.692302	0.0892488	8.38515	0.14762	0.00237617	0.00241738	0.00957184	0.00957184
AK4	ENST00000546702.5	8.87714e-15	1.10041e-12	-1.15548	0.14901	6.16676	0.427188	0.00722929	0.0260769	0.0147017	0.0260769
SREBF1	ENST00000261646.9	1.06003e-14	1.29573e-12	-0.834602	0.107944	6.72776	0.219435	0.00555191	0.00753161	0.0119258	0.0119258
SARS1	ENST00000234677.7	1.35054e-14	1.64226e-12	-0.837249	0.10872	8.29944	0.22448	0.000394257	0.0173359	0.00949839	0.0173359
GPR50	ENST00000218316.3	1.37557e-14	1.6698e-12	-2.86333	0.371928	3.56992	2.6062	0.0623912	0.120865	0.145104	0.145104
PPID	ENST00000307720.4	1.38486e-14	1.6753e-12	-0.651321	0.0846119	7.4362	0.133051	0.000836734	0.00639509	0.00990202	0.00990202
SLCO5A1	ENST00000260126.9	1.38322e-14	1.6753e-12	-1.52096	0.197582	4.57324	0.731602	0.0188899	0.028114	0.0396679	0.0396679
MATK	ENST00000310132.11	1.42796e-14	1.72151e-12	-1.1966	0.155527	5.48961	0.457647	0.0155128	0.0196034	0.0207702	0.0207702
CHEK2	ENST00000404276.6	1.48405e-14	1.7752e-12	-0.971329	0.126329	6.88092	0.293581	0.0126026	0.000568431	0.0113358	0.0113358
YARS1	ENST00000373477.8	1.90815e-14	2.25024e-12	-0.63108	0.0824222	8.16212	0.123012	0.000765918	0.00365147	0.00942421	0.00942421
SNX9	ENST00000392185.7	2.41022e-14	2.82808e-12	-0.6321	0.0828809	7.53958	0.127732	0.000560708	0.00927281	0.00974316	0.00974316
NOS1	ENST00000317775.11	2.42981e-14	2.84632e-12	-1.13783	0.149212	5.42496	0.415111	0.00494324	0.0284532	0.0217383	0.0284532
FUCA2	ENST00000002165.10	2.51764e-14	2.94429e-12	-0.644282	0.0845406	7.38582	0.132288	0.000729709	0.00896776	0.00999097	0.00999097
PCSK1	ENST00000508626.5	2.60805e-14	3.03488e-12	-5.59498	0.734594	3.17317	10.0387	0.272118	0.537325	0.249809	0.537325
ILDR2	ENST00000271417.8	2.71236e-14	3.15104e-12	-1.83426	0.24099	4.24865	1.07904	0.025559	0.0615552	0.0546682	0.0615552
MBNL3	ENST00000370857.7	2.77322e-14	3.21113e-12	-1.71766	0.225755	5.57189	0.94626	0.0109756	0.0654725	0.0196761	0.0654725
TMEM38A	ENST00000187762.7	2.89607e-14	3.33689e-12	-1.0036	0.132002	5.43547	0.312235	0.00456294	0.00802958	0.0215739	0.0215739
TRIM43	ENST00000272395.2	3.32956e-14	3.81758e-12	-5.36116	0.706828	2.52579	9.22215	0.168055	0.581354	0.516122	0.581354
CDX2	ENST00000548877.1	3.65712e-14	4.17274e-12	-5.35651	0.707351	2.26821	8.73614	0.0931181	0.0674627	0.6574	0.6574
HAX1	ENST00000328703.11	3.76435e-14	4.28812e-12	-0.685625	0.0905846	7.13939	0.150433	0.00176836	0.00999186	0.01054	0.01054
RTP1	ENST00000312295.4	3.83943e-14	4.36657e-12	-1.5701	0.207512	4.50835	0.791242	0.0120722	0.0525198	0.042005	0.0525198
NRIP3	ENST00000309166.8	3.86657e-14	4.39034e-12	-1.03229	0.136448	5.38436	0.341831	0.00554358	0.0221402	0.0223836	0.0223836
MACC1	ENST00000400331.9	4.17367e-14	4.7314e-12	-1.12172	0.148465	6.31913	0.403927	0.00315817	0.0299045	0.0138781	0.0299045
MTHFD1L	ENST00000367307.8	4.33208e-14	4.89518e-12	-1.08445	0.143624	5.59504	0.358065	0.0115482	-0.00497639	0.0193934	0.0193934
SOD2	ENST00000546260.5	4.61165e-14	5.20272e-12	-0.720647	0.0955452	7.3258	0.166754	0.00142059	0.0122727	0.010107	0.0122727
IFRD1	ENST00000005558.8	4.7086e-14	5.30358e-12	-1.37095	0.18183	6.36824	0.603528	0.00489599	0.0446972	0.0136282	0.0446972
IMPDH2	ENST00000326739.9	4.7528e-14	5.3448e-12	-0.634342	0.0841466	8.87796	0.123547	0.00019155	0.00334559	0.0104294	0.0104294
NQO2	ENST00000380455.9	4.9375e-14	5.53365e-12	-0.899781	0.119436	5.80519	0.253178	0.00416016	0.00870993	0.0172374	0.0172374
CLN8	ENST00000636605.1	4.94434e-14	5.53365e-12	-1.46869	0.194958	7.34225	0.692728	0.00104346	0.0559695	0.0100741	0.0559695
LARP1B	ENST00000394288.7	4.993e-14	5.57923e-12	-0.725871	0.0963703	6.82891	0.16613	0.00240511	0.00767449	0.0115257	0.0115257
SMARCA2	ENST00000450198.6	5.51316e-14	6.13121e-12	-6.04846	0.804407	2.33108	11.0834	0.349795	-0.214573	0.620812	0.620812
SLC43A1	ENST00000528450.5	5.83276e-14	6.456e-12	-1.31274	0.174757	5.89589	0.553528	0.0293185	0.0163618	0.0164916	0.0164916
NANOG	ENST00000229307.9	6.16414e-14	6.81205e-12	-1.46038	0.1946	7.04935	0.685257	0.00126975	0.0555337	0.0107903	0.0555337
SLC1A5	ENST00000594991.5	6.40378e-14	7.06578e-12	-1.7937	0.239175	5.85338	1.03386	0.0265044	0.0593025	0.0168296	0.0593025
IL6R	ENST00000368485.8	6.44662e-14	7.10189e-12	-1.50653	0.200906	4.48555	0.695391	0.0176545	0.000472063	0.0428905	0.0428905
NELL2	ENST00000452445.6	6.6156e-14	7.27664e-12	-1.28504	0.171447	6.6357	0.519524	0.031764	-0.00160721	0.0123269	0.0123269
SHISA9	ENST00000558583.3	7.21613e-14	7.90009e-12	-0.974276	0.130183	6.51737	0.305101	0.0018063	0.0236152	0.0128924	0.0236152
PPP1R2	ENST00000618156.5	7.66469e-14	8.33921e-12	-0.659912	0.0882713	7.10549	0.134903	0.00105676	0.00426589	0.010631	0.010631
LETMD1	ENST00000262055.9	8.26302e-14	8.9763e-12	-1.01012	0.135295	6.23528	0.316907	0.0131366	0.000370074	0.0143204	0.0143204
NARS1	ENST00000586807.5	8.27671e-14	8.9773e-12	-0.787602	0.105494	7.25416	0.199379	0.00643327	0.0101717	0.0102602	0.0102602
NIPA2	ENST00000398013.7	9.59833e-14	1.03787e-11	-0.794789	0.106736	7.48841	0.203178	0.00148785	0.015601	0.00981787	0.015601
RRS1	ENST00000320270.4	1.08388e-13	1.15952e-11	-0.740262	0.0996281	6.77157	0.176307	0.00112535	0.0137633	0.0117474	0.0137633
DFFA	ENST00000377038.8	1.26198e-13	1.348e-11	-0.596315	0.0804732	8.21088	0.109282	0.000269426	0.00298664	0.00944449	0.00944449
NARS1	ENST00000256854.10	1.28582e-13	1.37138e-11	-0.686217	0.0926366	8.78608	0.151566	0.000470704	0.0124016	0.0102097	0.0124016
PHKA1	ENST00000373539.3	1.29117e-13	1.375e-11	-0.866345	0.116962	6.06282	0.234565	0.00519387	0.00655416	0.0153262	0.0153262
PDE5A	ENST00000354960.8	1.36491e-13	1.44695e-11	-0.91972	0.124292	6.44621	0.265594	0.00993193	0.00485329	0.0132406	0.0132406
POLR1E	ENST00000377798.9	1.38654e-13	1.46767e-11	-0.659889	0.0892029	6.99448	0.13343	0.000979037	0.00251305	0.0109567	0.0109567
TCF4	ENST00000356073.8	1.39048e-13	1.46962e-11	-6.13907	0.829914	2.37639	11.3332	0.437729	-0.404313	0.595407	0.595407
CDK13	ENST00000642592.1	1.42852e-13	1.50305e-11	-2.12852	0.287884	3.92678	1.3868	0.0402171	-0.00568215	0.0840991	0.0840991
SLC7A5	ENST00000565644.5	1.47741e-13	1.55217e-11	-1.24503	0.168494	8.74757	0.499101	0.00181794	0.0407675	0.0101261	0.0407675
ZNF37A	ENST00000351773.7	1.52131e-13	1.59352e-11	-0.812314	0.109991	6.50447	0.20467	0.00519163	0.00320077	0.0129554	0.0129554
FADS3	ENST00000278829.7	1.56929e-13	1.64134e-11	-0.860858	0.116629	6.0729	0.231543	0.00514075	0.00638355	0.0152628	0.0152628
CMKLR1	ENST00000550402.6	1.73231e-13	1.80505e-11	-5.61024	0.761436	2.11198	9.8899	0.114906	0.444397	0.754771	0.754771
ONECUT2	ENST00000491143.3	1.8566e-13	1.91899e-11	-1.54417	0.209842	4.30954	0.724528	0.0149304	-0.00344831	0.0511203	0.0511203
FOXH1	ENST00000377317.4	1.91594e-13	1.97741e-11	-0.668348	0.0908757	7.99975	0.143917	0.000380343	0.0120072	0.00940417	0.0120072
LMO7	ENST00000377499.9	2.22407e-13	2.29206e-11	-2.02523	0.27612	5.26366	1.32195	0.0347467	0.0796168	0.0243196	0.0796168
ASNS	ENST00000175506.8	2.35941e-13	2.41608e-11	-1.09471	0.149414	6.31036	0.384963	0.0195635	0.0122472	0.0139233	0.0139233
NOB1	ENST00000268802.10	2.41521e-13	2.46734e-11	-0.60289	0.0823223	7.64158	0.110642	0.000548599	0.00145018	0.00961684	0.00961684
NR3C2	ENST00000358102.8	2.82838e-13	2.86858e-11	-5.6455	0.773111	2.12961	9.59613	0.153208	-0.109936	0.743342	0.743342
BNIP3	ENST00000368636.8	3.14165e-13	3.17713e-11	-0.633388	0.0869062	7.29341	0.129041	0.00115474	0.00970333	0.0101743	0.0101743
JPH1	ENST00000342232.5	3.24489e-13	3.27213e-11	-0.889688	0.122146	5.7843	0.251557	0.00495651	0.0126608	0.0174229	0.0174229
PDCD11	ENST00000369797.8	4.00166e-13	3.99512e-11	-0.653402	0.0900561	8.29366	0.13144	0.00267095	0.00152888	0.0094942	0.0094942
PTP4A1	ENST00000626021.2	4.02086e-13	4.0086e-11	-0.620101	0.0854739	7.39244	0.12248	0.000979846	0.00792311	0.00997884	0.00997884
OGDHL	ENST00000374103.9	4.18257e-13	4.15214e-11	-1.08683	0.149917	6.13631	0.37485	0.0188343	0.00678146	0.0148783	0.0148783
TLL2	ENST00000357947.4	4.18055e-13	4.15214e-11	-2.132	0.294086	3.93792	1.43432	0.0470172	0.0413477	0.0827128	0.0827128
ANKRD11	ENST00000567736.6	4.34684e-13	4.30914e-11	-0.728312	0.100536	6.43243	0.168328	0.0018527	0.0096429	0.0133085	0.0133085
DHX37	ENST00000308736.7	4.80496e-13	4.74988e-11	-0.794179	0.109834	6.91541	0.203692	0.00124665	0.0168487	0.0112156	0.0168487
ASCC3	ENST00000369143.2	5.59644e-13	5.47836e-11	-0.959546	0.133086	5.47368	0.28834	0.00556856	0.00958251	0.0209993	0.0209993
TRIM43B	ENST00000639673.1	6.26445e-13	6.11523e-11	-5.5556	0.77219	2.08465	9.64433	0.121724	0.359429	0.772693	0.772693
SKAP2	ENST00000345317.7	7.29864e-13	7.0659e-11	-1.18126	0.164664	5.3372	0.451147	0.00666563	0.0340059	0.0231354	0.0340059
NANOG	ENST00000541267.5	7.57273e-13	7.32117e-11	-1.95213	0.272314	4.42738	1.18691	0.0659115	-0.0113266	0.045321	0.045321
INA	ENST00000369849.9	8.0894e-13	7.79922e-11	-0.904977	0.1264	6.84225	0.264867	0.00107555	0.0228899	0.011476	0.0228899
FXYD5	ENST00000392219.6	9.21288e-13	8.83394e-11	-0.89904	0.125884	6.93382	0.261498	0.00227969	0.0214907	0.0111533	0.0214907
DRAM1	ENST00000258534.13	9.9239e-13	9.48981e-11	-1.64347	0.23045	5.47404	0.874027	0.00493432	0.0747267	0.0209941	0.0747267
ADCY5	ENST00000462833.5	1.06846e-12	1.01895e-10	-1.26084	0.17705	5.4211	0.514535	0.0123424	0.0346778	0.0217995	0.0346778
GLDC	ENST00000321612.7	1.07929e-12	1.02788e-10	-0.760962	0.106877	7.0197	0.178316	0.00625502	-0.000508488	0.0108789	0.0108789
RPL26	ENST00000584164.6	1.15406e-12	1.0976e-10	-0.768882	0.108129	6.35244	0.189035	0.00382995	0.0107714	0.013708	0.013708
IGFBP2	ENST00000233809.9	1.24482e-12	1.18073e-10	-0.827531	0.116549	6.62705	0.221742	0.00322319	0.0171522	0.0123664	0.0171522
SLC25A4	ENST00000281456.11	1.41948e-12	1.34278e-10	-0.988292	0.139547	5.55968	0.316385	0.00647039	0.0227397	0.0198295	0.0227397
SNRPN	ENST00000584968.5	1.43945e-12	1.35983e-10	-0.954802	0.134855	5.96953	0.290489	0.0113304	0.0099134	0.0159484	0.0159484
GART	ENST00000361093.9	1.62263e-12	1.51864e-10	-0.702903	0.0995108	7.05209	0.160105	0.00192912	0.0129245	0.0107823	0.0129245
NA	ENST00000647448.1	1.74707e-12	1.63289e-10	-0.593711	0.0841748	7.42986	0.11223	0.000715306	0.00738693	0.0099128	0.0099128
CDCP1	ENST00000296129.6	1.78518e-12	1.66407e-10	-0.719264	0.102019	6.56692	0.167692	0.00163016	0.0139816	0.0126508	0.0139816
NANOGP8	ENST00000528386.3	2.12759e-12	1.97019e-10	-1.66699	0.237265	5.29827	0.901207	0.0160651	0.0683767	0.0237598	0.0683767
RIOK1	ENST00000379834.7	2.28717e-12	2.1124e-10	-0.658082	0.0938006	6.79012	0.133723	0.00152355	0.00322781	0.0116743	0.0116743
NANOG	ENST00000526286.1	2.55584e-12	2.35128e-10	-1.2477	0.178238	5.31677	0.500632	0.0241908	0.0178118	0.0234626	0.0234626
RBP1	ENST00000232219.6	2.64427e-12	2.42945e-10	-1.22322	0.174859	6.2441	0.485568	0.00742891	0.0384346	0.0142728	0.0384346
SLC16A12	ENST00000371790.5	2.92547e-12	2.6773e-10	-1.3616	0.195037	4.48086	0.59156	0.0139815	0.0302341	0.0430774	0.0430774
CD9	ENST00000009180.10	3.10584e-12	2.83499e-10	-0.795637	0.114105	6.93853	0.204042	0.00839236	0.00927166	0.0111375	0.0111375
SLC6A15	ENST00000450363.3	3.35654e-12	3.05194e-10	-1.03854	0.149174	5.20715	0.332973	0.00813225	0.00362282	0.0252471	0.0252471
FLAD1	ENST00000315144.14	3.70345e-12	3.36301e-10	-0.710185	0.102213	6.57245	0.15867	0.00304743	0.00615356	0.0126239	0.0126239
PNMA2	ENST00000522362.7	3.72319e-12	3.37575e-10	-1.40999	0.202955	6.50688	0.645849	0.00181979	0.0599661	0.0129436	0.0599661
TRABD2A	ENST00000479944.5	4.71479e-12	4.22139e-10	-2.20877	0.319468	4.06956	1.58608	0.0242278	0.128862	0.0684469	0.128862
SLC35F1	ENST00000360388.9	5.39487e-12	4.81191e-10	-1.16408	0.168835	5.76556	0.428362	0.0251636	0.00213494	0.0175942	0.0175942
PSMG4	ENST00000438998.6	5.40336e-12	4.81337e-10	-1.05636	0.153217	5.19299	0.343216	0.00973023	0.00082801	0.0254828	0.0254828
PHLDA1	ENST00000602540.5	5.79589e-12	5.12408e-10	-1.19274	0.173249	7.45193	0.462809	0.00764115	0.0373815	0.00987583	0.0373815
TUBA4A	ENST00000248437.9	6.02459e-12	5.30624e-10	-0.84537	0.12289	5.80583	0.223051	0.00542116	0.00539871	0.0172318	0.0172318
LRIG1	ENST00000273261.7	6.05778e-12	5.32214e-10	-1.06446	0.154757	6.55923	0.368662	0.00545007	0.0304744	0.0126883	0.0304744
NA	ENST00000631853.1	6.05778e-12	5.32214e-10	-1.06446	0.154757	6.55923	0.368662	0.00545007	0.0304744	0.0126883	0.0304744
TACR3	ENST00000304883.3	6.31218e-12	5.53872e-10	-1.43431	0.208705	4.35988	0.642532	0.0168518	0.0148447	0.0484852	0.0484852
PCDH11X	ENST00000298274.12	6.45865e-12	5.66017e-10	-1.08647	0.158167	5.53568	0.384145	0.00941261	0.0281124	0.0201399	0.0281124
TRIM64B	ENST00000329862.6	6.62526e-12	5.79896e-10	-5.266	0.767023	1.93986	8.57621	0.010819	0.310397	0.871667	0.871667
HTR7	ENST00000336152.8	6.75904e-12	5.89403e-10	-1.50855	0.21982	5.15923	0.71895	0.0464295	-0.00113522	0.0260514	0.0260514
SLC44A3-AS1	ENST00000452922.5	6.87381e-12	5.98669e-10	-0.904035	0.131779	5.44673	0.259426	0.00464761	0.0131555	0.0214008	0.0214008
SOX14	ENST00000306087.2	7.19536e-12	6.24353e-10	-3.40634	0.497006	3.17243	3.66304	0.120494	0.107129	0.250028	0.250028
RPL39L	ENST00000433055.1	7.28386e-12	6.31252e-10	-1.12608	0.164343	7.19279	0.412824	0.00104749	0.0394656	0.0104044	0.0394656
FOXH1	ENST00000525197.1	7.56669e-12	6.54957e-10	-1.09168	0.15945	5.28998	0.366939	0.0142431	-0.00248192	0.0238935	0.0238935
B3GNT7	ENST00000287590.6	9.173e-12	7.83976e-10	-1.25586	0.184173	7.32258	0.513861	0.000901091	0.0499786	0.0101136	0.0499786
FOXL2NB	ENST00000383165.4	9.17994e-12	7.83976e-10	-1.34521	0.19728	4.43925	0.564533	0.0135753	0.0134906	0.0448038	0.0448038
LDHA	ENST00000543445.5	9.36508e-12	7.98817e-10	-1.0688	0.156809	6.45672	0.372209	0.00816282	0.0287209	0.013189	0.0287209
SEMA3E	ENST00000644381.1	1.03321e-11	8.77043e-10	-1.16531	0.171323	6.12202	0.442603	0.00267798	0.0413495	0.0149629	0.0413495
TUBB2B	ENST00000259818.8	1.05929e-11	8.97012e-10	-1.02451	0.150703	9.89756	0.342141	7.21425e-05	0.033995	0.0153574	0.033995
CCDC170	ENST00000239374.8	1.06788e-11	9.03198e-10	-1.54207	0.226873	4.1874	0.748568	0.0184876	0.0254855	0.0587194	0.0587194
GPI	ENST00000586425.2	1.10886e-11	9.34485e-10	-0.816393	0.120206	7.12905	0.217289	0.004363	0.0173113	0.0105673	0.0173113
PLAAT3	ENST00000323646.9	1.2322e-11	1.03225e-09	-1.06042	0.156487	5.89265	0.366731	0.00461474	0.0321176	0.0165166	0.0321176
RAC3	ENST00000580965.5	1.23653e-11	1.03464e-09	-0.809599	0.119483	6.01304	0.208437	0.00576412	0.00898859	0.01565	0.01565
DCLK1	ENST00000379892.4	1.26192e-11	1.05462e-09	-5.44403	0.803791	2.02887	8.90294	0.159063	-0.144432	0.810057	0.810057
EDAR	ENST00000258443.7	1.3883e-11	1.15749e-09	-5.22838	0.77353	2.44623	8.91881	0.243066	0.654456	0.557719	0.654456
FCRL5	ENST00000497286.5	1.42687e-11	1.18543e-09	-1.39838	0.20701	4.35642	0.604985	0.0156214	0.0073051	0.0486584	0.0486584
ATXN2L	ENST00000568266.5	1.47095e-11	1.22061e-09	-1.14337	0.16937	5.44744	0.426612	0.0137285	0.0293006	0.02139	0.0293006
KIF1A	ENST00000649096.1	1.52924e-11	1.26748e-09	-1.14925	0.170382	8.61254	0.431066	0.00375456	0.0397906	0.00987186	0.0397906
MRPS5	ENST00000345084.9	1.54578e-11	1.27968e-09	-0.684963	0.101573	6.54401	0.146507	0.00271318	0.00447996	0.0127625	0.0127625
WDR3	ENST00000349139.6	1.89276e-11	1.55594e-09	-0.656759	0.0978183	7.69521	0.140882	0.000578767	0.0137739	0.0095623	0.0137739
PLS1	ENST00000457734.7	1.9791e-11	1.62312e-09	-0.758178	0.113033	6.28217	0.179126	0.00509462	0.00325029	0.0140702	0.0140702
ABRAXAS1	ENST00000475656.6	2.05922e-11	1.68489e-09	-1.0435	0.155706	5.98367	0.350458	0.0205166	0.00922014	0.0158498	0.0158498
PSMD9	ENST00000537407.5	2.1214e-11	1.73174e-09	-0.740987	0.110638	6.27005	0.169106	0.00422693	0.00125729	0.0141342	0.0141342
ITGA6	ENST00000264107.11	2.19061e-11	1.78616e-09	-1.34164	0.200463	7.21683	0.571417	0.0499317	-0.0106636	0.0103465	0.0103465
MAP3K21	ENST00000366624.8	2.64817e-11	2.14185e-09	-0.764771	0.114746	6.24556	0.190528	0.00548501	0.0133466	0.0142649	0.0142649
TRABD2A	ENST00000495990.5	3.95038e-11	3.11969e-09	-2.39194	0.36209	4.91569	1.87374	0.0146688	0.181995	0.0305912	0.181995
MRPS5	ENST00000272418.7	4.01198e-11	3.15769e-09	-0.736677	0.111556	6.18172	0.171006	0.0040506	0.00619668	0.0146166	0.0146166
EIF5A	ENST00000419711.6	4.52144e-11	3.53492e-09	-0.979351	0.148704	6.68573	0.314274	0.0136603	0.0195092	0.0121044	0.0195092
CALB1	ENST00000514406.2	4.61878e-11	3.60701e-09	-1.09287	0.166021	7.81906	0.391387	0.000560573	0.040784	0.00946709	0.040784
MTHFD2	ENST00000477455.5	4.62742e-11	3.60974e-09	-1.30095	0.19764	5.62565	0.554618	0.0163552	0.0422369	0.0190348	0.0422369
NA	ENST00000378300.10	5.07958e-11	3.94495e-09	-1.17827	0.179379	5.85095	0.433863	0.0314157	-0.00970337	0.0168496	0.0168496
NMI	ENST00000243346.9	5.16484e-11	4.00674e-09	-1.42607	0.217187	4.27969	0.64071	0.0179479	0.0203076	0.0528074	0.0528074
CBR1	ENST00000290349.11	5.51799e-11	4.25255e-09	-0.662869	0.101105	6.58909	0.144085	0.0014169	0.0139164	0.012544	0.0139164
KBTBD8	ENST00000417314.2	6.13743e-11	4.68879e-09	-0.792327	0.121144	6.12652	0.205946	0.00273699	0.019277	0.0149361	0.019277
SLC7A5	ENST00000261622.5	6.26589e-11	4.78174e-09	-1.27319	0.194759	9.04552	0.531818	0.00107875	0.0558176	0.0109089	0.0558176
GLB1L3	ENST00000389887.9	6.32085e-11	4.81845e-09	-1.07746	0.164852	4.8655	0.356428	0.00909482	0.00109234	0.0316694	0.0316694
CAMLG	ENST00000297156.4	6.41628e-11	4.88061e-09	-0.597924	0.0915138	6.88262	0.109214	0.00123237	0.00121784	0.0113298	0.0113298
BUD23	ENST00000265758.6	6.74848e-11	5.12775e-09	-0.615082	0.094249	6.78722	0.122383	0.00163868	0.00946772	0.0116856	0.0116856
TRIM36	ENST00000514154.1	7.73635e-11	5.85937e-09	-1.68585	0.259136	5.58298	0.933208	0.0112444	0.0894832	0.0195394	0.0894832
TIMM44	ENST00000270538.8	8.20745e-11	6.16304e-09	-0.93967	0.144637	7.07075	0.289998	0.00214498	0.0292348	0.0107283	0.0292348
RPL22L1	ENST00000475836.5	8.4932e-11	6.35048e-09	-1.02305	0.157596	5.61963	0.343791	0.0082055	0.029049	0.0191041	0.029049
AXIN2	ENST00000618960.4	8.66802e-11	6.44689e-09	-2.12566	0.327603	6.10689	1.37389	0.145932	-0.122984	0.0150537	0.0150537
NEFH	ENST00000310624.6	8.66323e-11	6.44689e-09	-1.06593	0.164278	5.32088	0.373249	0.00563683	0.034844	0.0233967	0.034844
WDR74	ENST00000278856.8	8.72394e-11	6.48163e-09	-0.826901	0.12746	6.54684	0.224625	0.00596537	0.0184035	0.0127487	0.0184035
SLC25A6	ENST00000475167.6	8.96188e-11	6.65138e-09	-1.50197	0.231661	4.71577	0.734355	0.0451662	0.026805	0.035334	0.035334
RPL28	ENST00000344063.6	9.26232e-11	6.86711e-09	-0.60924	0.09404	6.78821	0.120806	0.00158353	0.0102337	0.0116817	0.0116817
MTHFD2	ENST00000394053.7	9.87042e-11	7.29488e-09	-1.41242	0.218339	8.15312	0.655683	0.000652513	0.0708553	0.00942119	0.0708553
CHGB	ENST00000378961.9	1.00986e-10	7.44783e-09	-1.21176	0.187421	4.56142	0.469744	0.0126156	0.0239238	0.0400743	0.0400743
MTHFD2	ENST00000470592.5	1.02091e-10	7.52142e-09	-1.29545	0.200415	8.07972	0.551654	0.00233242	0.0579168	0.00940495	0.0579168
SCGB3A2	ENST00000514688.1	1.06065e-10	7.7897e-09	-1.13767	0.176163	6.36868	0.425526	0.00246889	0.0440812	0.0136259	0.0440812
TRIM49D1	ENST00000420869.2	1.11848e-10	8.18025e-09	-5.153	0.798914	1.88335	8.28548	0.0454736	0.353853	0.911922	0.911922
TRIM49D2	ENST00000623787.3	1.11848e-10	8.18025e-09	-5.153	0.798914	1.88335	8.28548	0.0454736	0.353853	0.911922	0.911922
BLOC1S2	ENST00000441611.5	1.18099e-10	8.61952e-09	-0.755202	0.117235	6.28412	0.187592	0.00518714	0.0154291	0.01406	0.0154291
KLF18	ENST00000634670.1	1.20369e-10	8.77605e-09	-4.83032	0.750182	2.08491	7.2774	0.071638	0.275611	0.772521	0.772521
TRMT1	ENST00000357720.8	1.23353e-10	8.97504e-09	-0.766704	0.119143	6.46565	0.191045	0.00814746	0.0102207	0.0131452	0.0131452
RELL1	ENST00000454158.7	1.27217e-10	9.20849e-09	-1.02551	0.159478	5.69058	0.346024	0.00415829	0.0339914	0.0183283	0.0339914
MEF2B	ENST00000424583.7	1.3237e-10	9.54217e-09	-6.39371	0.995219	2.50397	12.6002	0.958297	-0.537815	0.527393	0.527393
WSCD1	ENST00000574946.5	1.34549e-10	9.68931e-09	-6.21229	0.967354	2.41319	11.6327	0.828289	-0.759563	0.575371	0.575371
DDX25	ENST00000525943.1	1.37428e-10	9.86633e-09	-0.958299	0.149298	5.39386	0.302249	0.00778283	0.0256519	0.0222325	0.0256519
UNC93A	ENST00000230256.8	1.47658e-10	1.05576e-08	-5.13208	0.800914	1.87289	8.03251	0.0427314	0.121079	0.919463	0.919463
RPS14	ENST00000312037.6	1.74891e-10	1.24433e-08	-0.596186	0.0934182	7.27709	0.116206	0.00288102	0.00908715	0.0102094	0.0102094
NA	ENST00000639708.2	1.74917e-10	1.24433e-08	-1.0555	0.16539	7.56495	0.367048	0.00141616	0.0396145	0.00970895	0.0396145
CPT1A	ENST00000265641.10	1.83166e-10	1.30039e-08	-1.72488	0.270577	6.38452	0.980422	0.00378172	0.106036	0.0135464	0.106036
VASH2	ENST00000366968.8	1.84782e-10	1.31054e-08	-0.790763	0.124071	6.55884	0.206064	0.00614838	0.0169419	0.0126902	0.0169419
YARS1	ENST00000616261.1	2.12726e-10	1.49514e-08	-0.59752	0.09407	7.12471	0.117728	0.00229634	0.0109774	0.0105789	0.0109774
CAPN1	ENST00000527323.5	2.13647e-10	1.50012e-08	-1.61977	0.255033	6.35759	0.865143	0.0321313	0.0654317	0.0136819	0.0654317
CARS1	ENST00000278224.13	2.32851e-10	1.62845e-08	-0.782755	0.123503	7.35243	0.202115	0.00421721	0.0186623	0.0100542	0.0186623
UGP2	ENST00000337130.9	2.49643e-10	1.73552e-08	-0.922875	0.145858	6.76488	0.268972	0.0201378	-0.00330971	0.0117742	0.0117742
ABCB6	ENST00000265316.9	2.54841e-10	1.76991e-08	-0.978394	0.154711	5.29063	0.292428	0.0120201	-0.00545579	0.023883	0.023883
RCN3	ENST00000270645.8	2.73194e-10	1.89363e-08	-0.973381	0.15418	5.0676	0.294617	0.00800363	0.00496557	0.0276536	0.0276536
SETD4	ENST00000332131.8	2.76469e-10	1.91445e-08	-1.04032	0.164832	5.62232	0.345297	0.0216812	0.00408666	0.0190731	0.0190731
PARM1	ENST00000307428.7	2.90493e-10	2.00958e-08	-1.69233	0.268463	4.81778	0.945681	0.0126063	0.0955023	0.032758	0.0955023
TM7SF3	ENST00000343028.9	2.95949e-10	2.0453e-08	-1.03453	0.164188	7.22827	0.353423	0.00111025	0.0393261	0.0103196	0.0393261
DSEL	ENST00000310045.8	2.99821e-10	2.07003e-08	-1.843	0.292593	7.08153	1.12173	0.00462442	0.123791	0.0106976	0.123791
DDX21	ENST00000354185.9	3.11398e-10	2.13945e-08	-0.932946	0.148251	9.53811	0.28749	7.6133e-05	0.0328916	0.0130054	0.0328916
ZFP42	ENST00000509524.5	3.40251e-10	2.3173e-08	-0.670703	0.106813	6.70813	0.137438	0.00510523	-0.00199908	0.0120083	0.0120083
SLC3A2	ENST00000377891.6	3.70922e-10	2.51846e-08	-1.16867	0.186516	6.82107	0.451484	0.00935508	0.0428273	0.0115553	0.0428273
PRDX1	ENST00000424390.1	3.71221e-10	2.51846e-08	-1.37462	0.219388	4.46714	0.624495	0.0285646	0.043466	0.0436323	0.0436323
GBX2	ENST00000465889.1	3.72701e-10	2.52606e-08	-5.28015	0.842794	1.94693	8.50897	0.198766	-0.0175557	0.866687	0.866687
NSG1	ENST00000433139.6	3.79748e-10	2.56888e-08	-0.978029	0.156181	5.23371	0.309512	0.0117801	0.0164073	0.0248088	0.0248088
B3GALT5	ENST00000380620.8	4.10299e-10	2.76225e-08	-1.09139	0.174621	6.97108	0.393932	0.00107459	0.0446641	0.011031	0.0446641
SLC3A2	ENST00000338663.11	4.3562e-10	2.92431e-08	-0.960875	0.153969	7.93575	0.305432	0.00130651	0.0342532	0.0094162	0.0342532
NA	ENST00000369066.7	4.51233e-10	3.02047e-08	-1.35156	0.216764	5.95149	0.6044	0.00911638	0.0613633	0.0160769	0.0613633
PPM1J	ENST00000309276.10	4.62313e-10	3.08875e-08	-0.919436	0.147549	5.39025	0.279734	0.00773731	0.0249188	0.0222899	0.0249188
ZNF589	ENST00000457782.5	4.69658e-10	3.13187e-08	-0.927343	0.148877	6.15729	0.266156	0.0184904	-0.00828299	0.0147561	0.0147561
NFKBIB	ENST00000509705.3	4.75812e-10	3.1669e-08	-0.917915	0.147412	5.11618	0.262988	0.0058032	0.00696865	0.0267921	0.0267921
NFKBIB	ENST00000635416.1	4.75812e-10	3.1669e-08	-0.917915	0.147412	5.11618	0.262988	0.0058032	0.00696865	0.0267921	0.0267921
PDCD2	ENST00000392090.6	4.78838e-10	3.17801e-08	-0.691143	0.111011	6.24097	0.155061	0.00419555	0.0105013	0.0142896	0.0142896
PPARGC1B	ENST00000309241.10	4.91575e-10	3.25947e-08	-1.33326	0.21429	5.65099	0.588381	0.00471777	0.0641625	0.0187508	0.0641625
MED10	ENST00000255764.4	5.12593e-10	3.3797e-08	-0.829146	0.133406	6.13068	0.227602	0.00225929	0.0244365	0.0149115	0.0244365
CREB3L2	ENST00000456390.5	5.21835e-10	3.43098e-08	-1.19143	0.191782	4.60707	0.457272	0.0166233	0.0226542	0.0385474	0.0385474
CHRDL1	ENST00000372045.5	5.78425e-10	3.78534e-08	-1.3127	0.211856	4.75965	0.570818	0.0138437	0.053481	0.0341803	0.053481
SLC3A2	ENST00000537508.5	5.82988e-10	3.81165e-08	-1.0712	0.172915	5.99773	0.380122	0.0223181	0.0225313	0.0157533	0.0225313
CDX1	ENST00000616154.1	5.94884e-10	3.87143e-08	-4.97923	0.804167	2.52806	8.21383	0.0405327	0.929495	0.51496	0.929495
PIWIL2	ENST00000356766.11	6.42704e-10	4.17105e-08	-2.069	0.334812	4.53752	1.41875	0.0389692	0.12918	0.0409219	0.12918
VASH2	ENST00000366965.6	6.80779e-10	4.40594e-08	-0.904239	0.146543	5.99374	0.265445	0.0164316	0.00875588	0.0157805	0.0157805
TIGAR	ENST00000179259.6	6.91757e-10	4.47288e-08	-0.850168	0.137836	6.45511	0.239634	0.00238367	0.0261145	0.0131969	0.0261145
AXIN2	ENST00000580513.1	7.19165e-10	4.64582e-08	-2.19103	0.355582	3.74445	1.48904	0.0785417	-0.017472	0.111117	0.111117
COX10	ENST00000261643.8	7.38263e-10	4.76481e-08	-0.626669	0.101771	6.38644	0.122286	0.00199902	0.00359124	0.0135369	0.0135369
TSSC2	ENST00000526488.5	7.56416e-10	4.87194e-08	-0.725223	0.117849	5.80579	0.163096	0.00360061	0.00303903	0.0172321	0.0172321
TFCP2L1	ENST00000263707.6	7.56941e-10	4.87194e-08	-0.757892	0.12316	5.61927	0.189323	0.00364451	0.0176097	0.0191082	0.0191082
SEPTIN6	ENST00000354416.7	7.8607e-10	5.04556e-08	-0.704654	0.11462	6.21515	0.157704	0.00527647	0.0056526	0.0144303	0.0144303
KLF13	ENST00000621843.1	8.44664e-10	5.40685e-08	-0.872795	0.142235	6.46179	0.252808	0.00992671	0.0204194	0.0131641	0.0204194
LDHA	ENST00000430553.6	9.17754e-10	5.84279e-08	-0.88822	0.145061	7.80529	0.261931	0.00368312	0.0278808	0.00947557	0.0278808
HES2	ENST00000377834.8	9.41292e-10	5.9818e-08	-2.7811	0.454498	3.32703	2.34527	0.104423	-0.0732893	0.20543	0.20543
TKT	ENST00000423525.6	9.79973e-10	6.21077e-08	-0.628366	0.102798	7.18298	0.129983	0.00542244	0.00898983	0.0104286	0.0104286
WIPF3	ENST00000409290.1	1.07124e-09	6.77088e-08	-1.26761	0.207858	5.93946	0.529806	0.0486436	0.0110527	0.0161642	0.0161642
ZDHHC14	ENST00000414563.6	1.07265e-09	6.77367e-08	-2.18533	0.358356	3.87808	1.48316	0.102122	-0.0390471	0.0905068	0.0905068
TUBB2A	ENST00000333628.4	1.12409e-09	7.07946e-08	-0.867439	0.14242	9.11726	0.250075	0.000182806	0.0302424	0.0111472	0.0302424
PNO1	ENST00000263657.7	1.17225e-09	7.3564e-08	-0.708229	0.116408	7.07044	0.166737	0.00107006	0.0192563	0.0107292	0.0192563
POLR3G	ENST00000504930.5	1.26838e-09	7.93144e-08	-1.27704	0.210339	6.35543	0.526819	0.0526706	-0.00570805	0.0136928	0.0136928
PARP12	ENST00000488726.5	1.2684e-09	7.93144e-08	-1.24025	0.20428	4.82024	0.49549	0.0298953	0.0126301	0.0327001	0.0327001
RPS17	ENST00000617731.2	1.2715e-09	7.94374e-08	-1.16131	0.191289	5.07948	0.438366	0.0274469	0.0147744	0.0274401	0.0274401
EPB41L5	ENST00000331393.8	1.3564e-09	8.45167e-08	-1.4294	0.235852	5.37625	0.679703	0.0442696	0.0391694	0.0225126	0.0391694
IFRD1	ENST00000403825.8	1.36487e-09	8.49688e-08	-1.36459	0.225197	6.62423	0.619491	0.00462805	0.0714421	0.0123794	0.0714421
TUBB2A	ENST00000489942.1	1.39746e-09	8.6921e-08	-1.37322	0.226763	5.05789	0.627429	0.023154	0.053978	0.0278296	0.053978
VSIG10	ENST00000359236.10	1.43971e-09	8.93905e-08	-0.921793	0.152338	6.86734	0.282759	0.00108977	0.0337205	0.0113844	0.0337205
RPL12	ENST00000497825.5	1.44205e-09	8.94569e-08	-0.919113	0.151902	6.04813	0.28112	0.00595349	0.0286577	0.0154199	0.0286577
AXIN2	ENST00000585045.1	1.45781e-09	9.02752e-08	-2.78123	0.459787	3.45591	2.38462	0.145455	-0.0654024	0.171651	0.171651
GDAP1	ENST00000220822.11	1.48519e-09	9.18085e-08	-0.971337	0.160659	6.47427	0.314022	0.00243939	0.0362775	0.013103	0.0362775
LSR	ENST00000605618.5	1.56375e-09	9.64956e-08	-0.599269	0.0992553	7.19416	0.118418	0.00437632	0.00897521	0.0104011	0.0104011
PFDN2	ENST00000368010.4	1.6226e-09	9.97762e-08	-0.586759	0.0972795	6.55	0.110821	0.00146163	0.00795747	0.0127333	0.0127333
SRPX	ENST00000378533.4	1.64125e-09	1.00835e-07	-1.15071	0.190836	5.27333	0.440942	0.00952317	0.0451043	0.0241627	0.0451043
DBNDD1	ENST00000002501.10	1.70961e-09	1.04943e-07	-0.636491	0.105673	7.14043	0.134936	0.0015772	0.0151729	0.0105373	0.0151729
UBE2D2	ENST00000505007.5	1.73166e-09	1.06204e-07	-1.25181	0.207901	4.80604	0.491812	0.0317979	-0.00466394	0.0330363	0.0330363
TRMT61A	ENST00000389749.9	1.75185e-09	1.07099e-07	-0.783316	0.130134	5.53694	0.193208	0.00527913	0.006137	0.0201233	0.0201233
DHRS7	ENST00000536410.6	1.78808e-09	1.09093e-07	-0.639487	0.106298	6.25563	0.128108	0.00273805	0.00404271	0.0142109	0.0142109
AC007546.3	ENST00000548191.1	1.92723e-09	1.16974e-07	-0.85535	0.142467	5.25336	0.240316	0.00595813	0.020078	0.0244873	0.0244873
KDM4E	ENST00000450979.2	1.99751e-09	1.2103e-07	-4.35174	0.725531	2.37081	6.12891	0.1911	0.368425	0.598492	0.598492
ZNF296	ENST00000303809.7	2.01535e-09	1.22006e-07	-1.86676	0.311306	4.79934	1.10569	0.11217	-0.0368583	0.033197	0.033197
TMEM18	ENST00000432667.5	2.07338e-09	1.25196e-07	-0.712104	0.118843	5.90093	0.164176	0.00473292	0.0103272	0.0164527	0.0164527
RASEF	ENST00000376447.4	2.15311e-09	1.29564e-07	-1.23213	0.205842	4.81021	0.506287	0.010126	0.0534301	0.0329369	0.0534301
HSPA9	ENST00000297185.9	2.2212e-09	1.33319e-07	-0.703357	0.117604	9.15069	0.16501	0.000984446	0.0197615	0.0112654	0.0197615
UTF1	ENST00000304477.3	2.23959e-09	1.34309e-07	-1.62766	0.272211	3.88522	0.81202	0.021617	-7.0743e-05	0.0895314	0.0895314
RABEPK	ENST00000373538.7	2.24272e-09	1.34381e-07	-0.668778	0.111851	6.09594	0.138778	0.0036458	0.00210238	0.0151203	0.0151203
ACSL4	ENST00000348502.10	2.32583e-09	1.39243e-07	-1.40305	0.234889	7.3937	0.656769	0.00840405	0.0743549	0.00997655	0.0743549
MAK16	ENST00000360128.11	2.37783e-09	1.42235e-07	-0.83758	0.140307	7.44602	0.234085	0.000819887	0.028709	0.00988558	0.028709
TSPAN13	ENST00000262067.5	2.38622e-09	1.42494e-07	-0.592059	0.0991879	6.48085	0.108588	0.0016866	0.00259819	0.0130708	0.0130708
PPM1E	ENST00000308249.4	2.40061e-09	1.43232e-07	-0.713521	0.119556	5.69605	0.168112	0.00316854	0.0160543	0.018272	0.018272
FLT4	ENST00000393347.7	2.44397e-09	1.45448e-07	-1.60677	0.26936	4.65353	0.861581	0.0276694	0.0811625	0.0371065	0.0811625
TAP2	ENST00000455842.2	2.57773e-09	1.52633e-07	-1.0728	0.180107	4.60428	0.365129	0.0100204	0.0148035	0.0386375	0.0386375
TAP2	ENST00000452371.6	2.57773e-09	1.52633e-07	-1.0728	0.180107	4.60428	0.365129	0.0100204	0.0148035	0.0386375	0.0386375
TRIM53AP	ENST00000532014.1	3.02058e-09	1.76771e-07	-4.43197	0.747321	2.24256	6.30347	0.164964	0.348503	0.672769	0.672769
RAB12	ENST00000329286.7	3.03829e-09	1.77659e-07	-0.80622	0.135967	7.12879	0.210732	0.0171626	0.00250622	0.010568	0.010568
ALDH3A2	ENST00000476965.5	3.12639e-09	1.82659e-07	-1.51387	0.255513	5.45259	0.765884	0.0376402	0.0602902	0.021312	0.0602902
PAK1IP1	ENST00000379568.4	3.30254e-09	1.9247e-07	-0.946267	0.159956	6.26857	0.299329	0.000965277	0.0374135	0.014142	0.0374135
PAK1IP1	ENST00000644756.2	3.30254e-09	1.9247e-07	-0.946267	0.159956	6.26857	0.299329	0.000965277	0.0374135	0.014142	0.0374135
C3orf52	ENST00000264848.9	3.3887e-09	1.96839e-07	-0.97283	0.164564	4.70504	0.301345	0.0049943	0.0167884	0.0356276	0.0356276
C3orf52	ENST00000643248.1	3.3887e-09	1.96839e-07	-0.97283	0.164564	4.70504	0.301345	0.0049943	0.0167884	0.0356276	0.0356276
RPL22L1	ENST00000295830.13	3.73126e-09	2.16379e-07	-0.849776	0.144135	5.33474	0.229172	0.0079877	0.00768278	0.0231747	0.0231747
CR2	ENST00000367058.7	4.05033e-09	2.34495e-07	-4.74961	0.807465	2.41787	7.55004	0.310174	0.667826	0.572861	0.667826
ATXN2L	ENST00000395547.6	4.07144e-09	2.3533e-07	-1.76999	0.300954	5.52957	1.01704	0.115639	-0.0191642	0.0202208	0.0202208
ADGRV1	ENST00000405460.9	4.14284e-09	2.39064e-07	-1.18284	0.201218	7.22977	0.468317	0.00269056	0.0580424	0.0103161	0.0580424
CDKN1A	ENST00000244741.9	4.14131e-09	2.39064e-07	-1.86959	0.318041	5.86585	1.16999	0.114364	0.0373605	0.0167284	0.0373605
NDUFAF4	ENST00000489477.1	4.25011e-09	2.45052e-07	-0.931085	0.158505	5.11608	0.277527	0.0108921	0.0109225	0.0267938	0.0267938
TCP1	ENST00000392168.6	4.34717e-09	2.5009e-07	-0.666099	0.113467	8.28735	0.148556	0.0015475	0.0177647	0.00948973	0.0177647
LARS1	ENST00000394434.7	4.37455e-09	2.51402e-07	-0.684819	0.116677	7.95974	0.157029	0.00247697	0.0179432	0.00941037	0.0179432
CD9	ENST00000382519.9	4.75836e-09	2.72568e-07	-0.796224	0.135981	6.41761	0.209363	0.0143544	0.00960956	0.0133818	0.0133818
LYAR	ENST00000343470.9	5.02095e-09	2.86443e-07	-0.853904	0.146054	6.73063	0.242873	0.020084	0.0100761	0.0119139	0.0119139
PMEL	ENST00000548493.5	5.15629e-09	2.93212e-07	-0.998597	0.170933	6.38799	0.308748	0.0302979	-0.0183116	0.0135291	0.0135291
SNHG32	ENST00000375638.7	5.22428e-09	2.95643e-07	-1.05934	0.181398	5.31625	0.376147	0.00450197	0.0448559	0.0234709	0.0448559
SNHG32	ENST00000433752.6	5.22428e-09	2.95643e-07	-1.05934	0.181398	5.31625	0.376147	0.00450197	0.0448559	0.0234709	0.0448559
SNHG32	ENST00000423640.6	5.22428e-09	2.95643e-07	-1.05934	0.181398	5.31625	0.376147	0.00450197	0.0448559	0.0234709	0.0448559
SNHG32	ENST00000414434.6	5.22428e-09	2.95643e-07	-1.05934	0.181398	5.31625	0.376147	0.00450197	0.0448559	0.0234709	0.0448559
SNHG32	ENST00000383383.6	5.22428e-09	2.95643e-07	-1.05934	0.181398	5.31625	0.376147	0.00450197	0.0448559	0.0234709	0.0448559
CALCB	ENST00000324229.11	5.2812e-09	2.98624e-07	-1.85166	0.31717	3.72964	1.10645	0.0372094	0.0601229	0.113686	0.113686
RAB6B	ENST00000285208.9	5.45234e-09	3.08053e-07	-1.05505	0.180884	5.40081	0.366297	0.0269568	0.0134886	0.022122	0.022122
ENTR1	ENST00000357365.8	5.47159e-09	3.08892e-07	-0.851156	0.145942	6.20377	0.23626	0.0174554	0.00619476	0.0144932	0.0144932
TCP1	ENST00000420894.6	5.71009e-09	3.2184e-07	-0.650712	0.111709	7.53896	0.142002	0.00471313	0.0140054	0.00974402	0.0140054
ADGRG5	ENST00000349457.8	5.82097e-09	3.27162e-07	-1.1134	0.191247	4.65161	0.385059	0.0176991	-0.00125035	0.0371638	0.0371638
KLHDC4	ENST00000446344.3	5.82315e-09	3.27162e-07	-0.696949	0.119714	5.74234	0.155733	0.00368448	0.00883037	0.0178129	0.0178129
PCDH18	ENST00000510305.5	5.87502e-09	3.29813e-07	-0.96747	0.166224	5.28887	0.312951	0.0175342	0.0226554	0.0239115	0.0239115
PALM3	ENST00000340790.8	5.96793e-09	3.34761e-07	-0.781546	0.13434	5.41536	0.191393	0.00518035	0.00500511	0.0218907	0.0218907
TBC1D23	ENST00000344949.9	6.20237e-09	3.45979e-07	-0.817703	0.140711	6.34179	0.212116	0.0159375	-0.001531	0.013762	0.013762
RNF43	ENST00000584437.5	6.38766e-09	3.56032e-07	-2.13104	0.367023	5.74871	1.52405	0.0126895	0.18937	0.0177522	0.18937
SYNE2	ENST00000344113.8	6.59348e-09	3.66342e-07	-6.15825	1.06159	4.16762	12.6566	1.6303	-0.0310141	0.0601665	0.0601665
FZD10	ENST00000229030.4	6.64505e-09	3.68625e-07	-3.55077	0.612238	2.72092	4.04856	0.141169	0.191534	0.421085	0.421085
PPP2R1B	ENST00000311129.9	6.6611e-09	3.69224e-07	-1.01074	0.174287	5.60161	0.329995	0.0262491	0.00314879	0.019315	0.019315
RPS24	ENST00000613865.5	6.87381e-09	3.80414e-07	-0.734957	0.126848	8.66161	0.181357	0.000600853	0.0235349	0.00995746	0.0235349
GABRP	ENST00000521009.5	6.93903e-09	3.8342e-07	-1.20745	0.208454	6.9945	0.489521	0.0010071	0.0641723	0.0109567	0.0641723
SKA3	ENST00000314759.6	7.04566e-09	3.89006e-07	-0.678794	0.117239	7.08158	0.154722	0.00345324	0.0171642	0.0106975	0.0171642
PID1	ENST00000392055.7	7.22212e-09	3.97188e-07	-1.32265	0.228608	4.41381	0.563047	0.0324664	0.0153169	0.0459257	0.0459257
TIMMDC1	ENST00000264244.7	7.26604e-09	3.99292e-07	-0.617979	0.106831	6.49891	0.120455	0.00413671	0.00322047	0.0129825	0.0129825
MAP1B	ENST00000296755.12	7.30038e-09	4.00865e-07	-0.888535	0.153623	9.38875	0.265168	7.92917e-05	0.0353208	0.0122487	0.0353208
PRUNE2	ENST00000376718.8	7.41873e-09	4.06411e-07	-6.0502	1.04654	2.33195	11.4921	1.02254	-0.38431	0.620318	0.620318
NRARP	ENST00000356628.4	7.51686e-09	4.11466e-07	-0.599607	0.103757	6.2457	0.118541	0.00188419	0.0114692	0.0142641	0.0142641
KLRG2	ENST00000340940.4	8.18019e-09	4.46733e-07	-1.09772	0.19042	5.03571	0.405006	0.00665358	0.0477363	0.0282368	0.0477363
HOMER2	ENST00000450735.7	8.20951e-09	4.47638e-07	-0.913033	0.1584	5.40664	0.262685	0.0156066	0.000139354	0.0220292	0.0220292
NCR3LG1	ENST00000338965.8	8.52538e-09	4.63065e-07	-1.48889	0.25859	4.58741	0.745281	0.0152048	0.0850983	0.0391908	0.0850983
DAP3	ENST00000343043.7	9.04432e-09	4.89361e-07	-0.596526	0.103784	6.90664	0.107559	0.00491106	-0.00390417	0.0112458	0.0112458
FGFBP3	ENST00000311575.5	9.45616e-09	5.10074e-07	-0.727011	0.126652	6.08264	0.177813	0.00233135	0.0217299	0.0152021	0.0217299
SFR1	ENST00000369727.3	1.00042e-08	5.37985e-07	-1.01737	0.177531	5.21345	0.348331	0.0146106	0.0326651	0.0251427	0.0326651
SLC3A2	ENST00000377889.6	1.04067e-08	5.5835e-07	-1.2135	0.212003	5.44794	0.475197	0.0460354	-0.00425334	0.0213823	0.0213823
TBRG1	ENST00000441174.8	1.05285e-08	5.63791e-07	-1.07913	0.188593	5.68267	0.392037	0.0234463	0.029905	0.0184108	0.029905
TRIM22	ENST00000379965.8	1.09056e-08	5.82447e-07	-1.29302	0.22621	5.50801	0.562974	0.00765682	0.0690996	0.0205128	0.0690996
EDIL3	ENST00000296591.10	1.1201e-08	5.97771e-07	-0.697626	0.122145	6.47568	0.150885	0.00928299	-0.00318227	0.0130961	0.0130961
PRKG2	ENST00000545647.5	1.15824e-08	6.15322e-07	-0.99018	0.17354	4.92756	0.330276	0.0108457	0.0343287	0.0303454	0.0343287
MMP9	ENST00000372330.3	1.19133e-08	6.31944e-07	-1.64216	0.28805	3.83149	0.870478	0.0272831	0.04955	0.0971764	0.0971764
NIFK	ENST00000285814.9	1.25059e-08	6.61881e-07	-0.625426	0.109865	7.13253	0.131832	0.00156025	0.0165452	0.0105581	0.0165452
RPL7P20	ENST00000520308.1	1.28024e-08	6.76045e-07	-3.10161	0.545226	3.09133	3.07179	0.170515	0.0617133	0.275391	0.275391
PLPP2	ENST00000434325.7	1.28865e-08	6.79978e-07	-0.935341	0.164454	5.99749	0.294913	0.0156912	0.0248763	0.0157549	0.0248763
HSPA9	ENST00000512328.1	1.36646e-08	7.18873e-07	-0.698567	0.12304	6.10846	0.160254	0.00766415	0.00965457	0.0150442	0.0150442
TRIM36	ENST00000513154.5	1.4071e-08	7.39147e-07	-1.29177	0.227723	5.70673	0.562828	0.0334893	0.0442977	0.0181633	0.0442977
RAB38	ENST00000243662.11	1.4113e-08	7.4025e-07	-0.687339	0.121181	5.75293	0.158255	0.004315	0.0163411	0.0177122	0.0177122
SEPTIN6	ENST00000467310.1	1.53266e-08	8.00319e-07	-1.29803	0.22942	4.54146	0.568621	0.0347113	0.0442388	0.0407798	0.0442388
GFRA1	ENST00000369236.5	1.53917e-08	8.0312e-07	-0.963851	0.170378	4.77212	0.307013	0.00967756	0.0257102	0.0338654	0.0338654
ECSIT	ENST00000270517.12	1.55056e-08	8.08466e-07	-0.671454	0.118718	6.05934	0.140343	0.00579264	0.000567475	0.0153483	0.0153483
SHMT2	ENST00000328923.8	1.57164e-08	8.18244e-07	-0.782162	0.138349	8.34416	0.206502	0.00253893	0.0261716	0.00953407	0.0261716
ETV1	ENST00000403685.5	1.59702e-08	8.29612e-07	-1.16599	0.206341	5.2375	0.458953	0.0268756	0.0369893	0.0247466	0.0369893
PAK1	ENST00000528203.5	1.61173e-08	8.36016e-07	-0.701494	0.124175	6.72406	0.158463	0.011188	0.00235561	0.0119412	0.0119412
SLC38A5	ENST00000620913.5	1.9363e-08	9.92654e-07	-1.1114	0.197843	5.62974	0.417533	0.0144666	0.0442459	0.0189883	0.0442459
IQGAP2	ENST00000274364.11	1.94895e-08	9.97685e-07	-0.880424	0.156758	6.87477	0.262032	0.0116964	0.025163	0.0113577	0.025163
CCNA1	ENST00000625767.1	2.07217e-08	1.05385e-06	-3.64135	0.64956	3.10454	4.48414	0.164858	0.468035	0.2711	0.468035
GDF15	ENST00000252809.3	2.0757e-08	1.05489e-06	-2.45592	0.438121	3.54168	1.82536	0.136558	-0.116672	0.151367	0.151367
TRIM14	ENST00000341469.7	2.08168e-08	1.0564e-06	-0.804581	0.143545	5.69333	0.218931	0.00381155	0.0270963	0.0183	0.0270963
CNTN1	ENST00000348761.2	2.15534e-08	1.08984e-06	-1.58347	0.28281	4.58179	0.786532	0.0805937	-0.0376914	0.0393786	0.0393786
WNT5B	ENST00000543563.1	2.25328e-08	1.13528e-06	-3.21493	0.574984	2.98053	3.38409	0.182069	0.17213	0.313841	0.313841
RPL27	ENST00000589913.6	2.2775e-08	1.14476e-06	-0.801822	0.143452	5.97772	0.21757	0.00658234	0.0242854	0.0158911	0.0242854
GPI	ENST00000647446.1	2.30927e-08	1.15934e-06	-0.916097	0.163967	6.90942	0.284032	0.0100309	0.030297	0.0112362	0.030297
RPL17	ENST00000579248.5	2.3322e-08	1.16834e-06	-0.662843	0.118675	6.69947	0.141194	0.00908048	0.00265227	0.0120452	0.0120452
TRIM6	ENST00000278302.9	2.48292e-08	1.2368e-06	-0.641174	0.11502	6.19965	0.138836	0.00532821	0.0140534	0.0145161	0.0145161
CCND1	ENST00000227507.2	2.54344e-08	1.2598e-06	-0.97449	0.174945	8.42071	0.321616	0.000229071	0.0456794	0.00960856	0.0456794
COL14A1	ENST00000247781.4	2.82194e-08	1.39088e-06	-3.07248	0.553387	4.17907	3.01322	0.400036	-0.173573	0.0593198	0.0593198
MREG	ENST00000620139.4	2.84593e-08	1.40074e-06	-0.694867	0.125186	6.02992	0.163658	0.0038245	0.0196829	0.0155382	0.0196829
ARHGAP8	ENST00000356099.10	2.96764e-08	1.45454e-06	-0.76679	0.138327	5.98527	0.182841	0.0128626	-0.00479893	0.0158387	0.0158387
GABRQ	ENST00000598523.3	3.03677e-08	1.48531e-06	-0.725103	0.130902	5.67173	0.178295	0.00351096	0.0221919	0.0185263	0.0221919
QRSL1	ENST00000369046.8	3.04766e-08	1.4896e-06	-0.745569	0.134611	6.69813	0.188506	0.00153815	0.0256422	0.0120509	0.0256422
OSBPL1A	ENST00000399441.4	3.18921e-08	1.55554e-06	-1.12325	0.203092	4.4871	0.428	0.0137176	0.048152	0.0428293	0.048152
KCNH8	ENST00000328405.7	3.20111e-08	1.56026e-06	-1.18784	0.214796	4.55364	0.465265	0.0288593	0.0236143	0.0403466	0.0403466
MTM1	ENST00000370396.6	3.32991e-08	1.61855e-06	-0.797306	0.144357	5.8887	0.215716	0.00500346	0.0262551	0.0165474	0.0262551
PRDM1	ENST00000369089.3	3.40628e-08	1.6511e-06	-4.98651	0.903492	1.80011	7.5541	0.251644	-0.133519	0.972802	0.972802
CLU	ENST00000405140.7	3.79714e-08	1.82921e-06	-0.725129	0.131841	6.5927	0.178602	0.00543041	0.0206426	0.0125269	0.0206426
HOXA1	ENST00000355633.5	3.92983e-08	1.88667e-06	-4.97364	0.90529	1.79367	7.564	0.251717	-0.0731435	0.977608	0.977608
DPP4	ENST00000360534.8	3.98825e-08	1.91341e-06	-1.27418	0.232033	4.64543	0.551668	0.0238975	0.0568616	0.0373499	0.0568616
GBX2	ENST00000306318.5	4.11597e-08	1.97199e-06	-5.81631	1.06025	4.24401	11.4978	0.0535953	1.63259	0.0549564	1.63259
MATR3	ENST00000505016.2	4.44476e-08	2.1194e-06	-0.858031	0.156798	5.07704	0.242277	0.00939467	0.0173695	0.0274838	0.0274838
LDB2	ENST00000441778.6	4.49003e-08	2.13954e-06	-0.736064	0.134554	6.08349	0.165761	0.0119602	-0.00793012	0.0151969	0.0151969
ZNF385C	ENST00000461831.1	4.60252e-08	2.19166e-06	-2.03484	0.372271	4.60312	1.40848	0.0935083	0.11437	0.038675	0.11437
ENOPH1	ENST00000509635.5	4.62914e-08	2.20135e-06	-0.787164	0.144037	6.39908	0.203357	0.0176463	0.00419019	0.0134738	0.0134738
GARS1	ENST00000389266.8	4.70546e-08	2.23311e-06	-0.738697	0.13524	9.1379	0.18565	0.000112599	0.0273224	0.0112196	0.0273224
SMPD3	ENST00000219334.10	4.99805e-08	2.36717e-06	-1.27827	0.234486	4.14654	0.538292	0.0206858	0.0394389	0.0617894	0.0617894
RIMKLA	ENST00000431473.4	5.05675e-08	2.38853e-06	-1.02151	0.187456	5.08151	0.355211	0.00749275	0.0452171	0.0274039	0.0452171
ZNF860	ENST00000360311.4	5.37949e-08	2.53077e-06	-1.63721	0.301053	3.78025	0.844609	0.0308035	0.0197803	0.105146	0.105146
SMARCA2	ENST00000636903.1	5.78613e-08	2.70398e-06	-5.01034	0.923515	1.81202	7.58238	0.315373	-0.251195	0.963948	0.963948
CDS1	ENST00000295887.6	5.80298e-08	2.71005e-06	-0.768005	0.141574	6.0789	0.201001	0.00257389	0.0274908	0.0152254	0.0274908
EEF2K	ENST00000644765.1	5.87512e-08	2.7401e-06	-0.616285	0.113652	6.04836	0.116263	0.00395672	-0.00105572	0.0154184	0.0154184
EEF2K	ENST00000638831.2	5.87512e-08	2.7401e-06	-0.616285	0.113652	6.04836	0.116263	0.00395672	-0.00105572	0.0154184	0.0154184
ZNF157	ENST00000377073.3	6.29386e-08	2.92375e-06	-1.64355	0.303784	3.77841	0.833657	0.0329815	-0.00387663	0.105446	0.105446
RPL28	ENST00000560881.5	6.41245e-08	2.97576e-06	-0.897955	0.166076	5.00016	0.271628	0.012466	0.0246979	0.0289057	0.0289057
PIPOX	ENST00000323372.9	6.68483e-08	3.0895e-06	-1.44805	0.268186	5.50797	0.715365	0.00630801	0.101577	0.0205134	0.101577
RPL36	ENST00000577222.5	6.68581e-08	3.0895e-06	-0.823248	0.15247	5.45919	0.231217	0.00961309	0.0252575	0.021213	0.0252575
RGMA	ENST00000329082.11	6.74612e-08	3.10919e-06	-1.17619	0.217901	4.3591	0.458646	0.0226976	0.0318265	0.048524	0.048524
TMEM30B	ENST00000555868.1	6.82902e-08	3.13916e-06	-0.60467	0.112067	5.95485	0.113359	0.00278574	0.00180273	0.0160528	0.0160528
ABHD12B	ENST00000555292.1	6.88079e-08	3.15883e-06	-0.978887	0.181468	6.06707	0.326983	0.00345485	0.0459413	0.0152995	0.0459413
MRPL2	ENST00000388752.8	6.87865e-08	3.15883e-06	-0.862189	0.159833	5.83326	0.253667	0.00789879	0.0304211	0.0169965	0.0304211
RPL21	ENST00000319826.8	6.94325e-08	3.18334e-06	-1.50661	0.279382	4.23506	0.771251	0.061562	0.0513048	0.0555195	0.0555195
ZDHHC14	ENST00000359775.10	6.99042e-08	3.20288e-06	-2.82147	0.523327	3.17032	2.56179	0.160146	0.0568204	0.25066	0.25066
PAICS	ENST00000399688.7	7.2036e-08	3.28983e-06	-0.931551	0.172957	7.74083	0.296233	0.0180498	0.0268216	0.00952226	0.0268216
APCDD1	ENST00000355285.10	7.26366e-08	3.3151e-06	-1.08404	0.201325	4.48516	0.380071	0.0178917	0.0165177	0.0429061	0.0429061
SMARCA2	ENST00000634925.1	7.43992e-08	3.38895e-06	-3.2096	0.596557	4.45727	3.25075	0.48978	-0.289422	0.0440402	0.0440402
TRIM53CP	ENST00000531490.2	7.83961e-08	3.55718e-06	-4.30681	0.801896	1.99277	6.33622	0.0677696	0.896786	0.834761	0.896786
FGD4	ENST00000534526.6	8.1327e-08	3.67357e-06	-1.24731	0.232526	5.06449	0.531613	0.035312	0.0457904	0.0277099	0.0457904
SMYD2	ENST00000366957.10	8.22702e-08	3.7114e-06	-1.15808	0.215976	5.87938	0.458321	0.0300435	0.0399251	0.0166206	0.0399251
SHISA9	ENST00000423335.2	8.25363e-08	3.72102e-06	-1.49189	0.278261	6.46376	0.760638	0.0021102	0.114033	0.0131545	0.114033
HTR7	ENST00000277874.10	8.54493e-08	3.84741e-06	-1.34744	0.251611	5.81372	0.608686	0.0777992	0.0022148	0.0171632	0.0171632
CARS1	ENST00000380525.8	8.62589e-08	3.88137e-06	-1.02331	0.191148	6.20313	0.352121	0.0403093	0.00715416	0.0144968	0.0144968
CYB5R2	ENST00000299498.11	9.77403e-08	4.35893e-06	-0.634192	0.118966	5.94396	0.127693	0.00509798	0.00369377	0.0161313	0.0161313
AKNA	ENST00000307564.8	9.984e-08	4.44411e-06	-1.66342	0.312261	5.08006	0.947096	0.0378791	0.108381	0.0274297	0.108381
NPM3	ENST00000474993.5	1.04504e-07	4.63996e-06	-1.09479	0.205838	5.03119	0.378352	0.0352332	-0.0117575	0.0283207	0.0283207
TPD52	ENST00000523319.6	1.1412e-07	5.01622e-06	-0.794263	0.149785	5.76851	0.216179	0.00878354	0.02487	0.0175669	0.02487
SAMD12	ENST00000409003.5	1.16737e-07	5.11527e-06	-0.586439	0.11068	5.99863	0.111899	0.00262778	0.00827999	0.0157471	0.0157471
NQO2	ENST00000397717.6	1.18014e-07	5.16798e-06	-0.985516	0.186068	4.94273	0.332918	0.0198844	0.0320474	0.0300355	0.0320474
TMEM242	ENST00000400788.8	1.18206e-07	5.17316e-06	-0.602253	0.113713	5.90813	0.110919	0.00299833	-0.000365102	0.0163977	0.0163977
TRIM51BP	ENST00000525732.2	1.23107e-07	5.37763e-06	-4.59984	0.869729	1.60677	6.51663	0.011194	0.200152	1.12345	1.12345
FAM162A	ENST00000232125.9	1.28132e-07	5.56942e-06	-0.819747	0.155211	6.14454	0.230504	0.00255331	0.0335824	0.0148301	0.0335824
EIF5A	ENST00000416016.2	1.28445e-07	5.57959e-06	-1.03432	0.195855	5.41822	0.351229	0.0356933	0.00216289	0.0218453	0.0218453
NA	ENST00000228280.9	1.29632e-07	5.62074e-06	-1.99843	0.378536	4.15296	1.31786	0.153648	-0.00396074	0.0612861	0.0612861
DAZL	ENST00000454457.1	1.30622e-07	5.66014e-06	-1.94342	0.368213	3.52753	1.23699	0.0487873	0.0811249	0.154584	0.154584
HHLA2	ENST00000467761.5	1.30984e-07	5.67234e-06	-1.69064	0.32035	3.72263	0.923481	0.0390147	0.0434896	0.114922	0.114922
SEPTIN6	ENST00000360156.11	1.33952e-07	5.79375e-06	-1.02789	0.194921	5.18771	0.362558	0.013948	0.0430432	0.0255712	0.0430432
RAB3C	ENST00000282878.6	1.34339e-07	5.80384e-06	-0.771267	0.146272	5.15493	0.199604	0.00596872	0.0204666	0.0261245	0.0261245
CPXM2	ENST00000241305.4	1.39398e-07	6.00342e-06	-1.46494	0.278186	4.97509	0.736679	0.0148411	0.10124	0.029391	0.10124
CCDC172	ENST00000333254.4	1.41009e-07	6.06537e-06	-1.93065	0.366769	3.52362	1.18124	0.0462977	0.0324824	0.155482	0.155482
PRUNE2	ENST00000426088.5	1.4181e-07	6.0961e-06	-1.73222	0.329139	4.95348	1.02523	0.13268	0.0236368	0.029819	0.029819
EIF3CL	ENST00000380876.4	1.4469e-07	6.20095e-06	-0.653361	0.124232	8.28894	0.141626	0.0136596	0.00329215	0.00949084	0.00949084
HSPA4L	ENST00000296464.9	1.46596e-07	6.26734e-06	-0.853361	0.162335	4.96791	0.223756	0.00999691	-0.00338633	0.0295322	0.0295322
AARS1	ENST00000261772.12	1.47956e-07	6.31779e-06	-0.746207	0.141997	9.04808	0.191244	0.000122293	0.0301225	0.010917	0.0301225
ILF3	ENST00000590261.5	1.48392e-07	6.33256e-06	-0.596978	0.113612	7.37324	0.114114	0.00934707	-0.000347831	0.0100144	0.0100144
DPH5	ENST00000370109.8	1.5195e-07	6.4687e-06	-0.717711	0.136702	5.98631	0.169269	0.0121997	0.00622046	0.0158315	0.0158315
ATF3	ENST00000465155.5	1.53511e-07	6.53118e-06	-1.61801	0.308293	3.83074	0.881303	0.0452779	0.0746143	0.0972888	0.0972888
CD44	ENST00000263398.10	1.59885e-07	6.77893e-06	-1.26566	0.241502	5.41899	0.550558	0.0114254	0.0760594	0.021833	0.0760594
UTP6	ENST00000477128.5	1.6311e-07	6.91028e-06	-0.710004	0.135572	6.80128	0.173287	0.00337157	0.0241979	0.0116309	0.0241979
NDUFS4	ENST00000506974.5	1.7166e-07	7.25069e-06	-1.11012	0.212355	4.57549	0.405643	0.0280506	0.0168648	0.0395913	0.0395913
CARM1	ENST00000344150.8	1.76581e-07	7.44509e-06	-0.653962	0.125221	6.95204	0.141585	0.0124278	0.00417939	0.0110928	0.0110928
FGF8	ENST00000618991.4	1.77247e-07	7.4687e-06	-1.16169	0.222471	5.00956	0.464248	0.0131396	0.0611006	0.0287268	0.0611006
RABGGTB	ENST00000471759.5	1.80805e-07	7.60949e-06	-1.07243	0.205522	5.80547	0.395717	0.0103866	0.0529723	0.017235	0.0529723
HEATR1	ENST00000366581.6	1.81178e-07	7.6161e-06	-0.62415	0.119622	7.51718	0.13404	0.00328642	0.0181777	0.00977493	0.0181777
ATP1B2	ENST00000250111.9	1.84957e-07	7.76566e-06	-0.877758	0.168351	6.82392	0.265148	0.00141926	0.0410939	0.0115445	0.0410939
OVOL1	ENST00000335987.8	1.93949e-07	8.12864e-06	-0.904352	0.173745	4.7136	0.261648	0.00988818	0.0104776	0.0353929	0.0353929
NBPF1	ENST00000449853.2	2.05533e-07	8.53774e-06	-0.661152	0.127285	5.70064	0.150578	0.00347677	0.0208255	0.0182251	0.0208255
CBR3	ENST00000290354.6	2.10913e-07	8.7509e-06	-3.31092	0.63801	2.69333	3.53558	0.176754	0.131887	0.433832	0.433832
NQO2	ENST00000606474.1	2.11504e-07	8.77024e-06	-2.02052	0.38939	3.50605	1.40253	0.0678716	0.154358	0.159565	0.159565
ABHD12B	ENST00000554241.5	2.19828e-07	9.09931e-06	-1.06046	0.204654	4.39508	0.362202	0.0160392	0.0149972	0.0467855	0.0467855
PYGL	ENST00000530336.2	2.21149e-07	9.14323e-06	-1.38015	0.266407	4.89891	0.656614	0.0145643	0.0918946	0.0309448	0.0918946
TAF11L11	ENST00000510838.2	2.23811e-07	9.23385e-06	-4.31712	0.833679	1.82223	5.85423	0.0861363	0.242596	0.956396	0.956396
SYT13	ENST00000020926.8	2.24681e-07	9.26198e-06	-0.626343	0.12097	5.66641	0.128235	0.00336746	0.00981241	0.0185832	0.0185832
ME1	ENST00000369705.4	2.27313e-07	9.36501e-06	-0.896415	0.173204	5.3195	0.277068	0.00492587	0.0400735	0.0234188	0.0400735
RABGAP1L	ENST00000635248.1	2.31531e-07	9.52205e-06	-1.50504	0.290994	4.10054	0.781154	0.0303612	0.096655	0.0656258	0.096655
NAP1L1	ENST00000551992.5	2.35392e-07	9.67518e-06	-0.940981	0.182044	5.35023	0.290346	0.0267829	0.00410769	0.0229274	0.0229274
ITGA4	ENST00000397033.7	2.435e-07	9.97344e-06	-1.18216	0.228983	4.32417	0.451064	0.0283217	0.0114471	0.0503284	0.0503284
SCLY	ENST00000651534.1	2.45518e-07	1.00444e-05	-0.601982	0.116639	6.38002	0.118177	0.00683786	0.00498972	0.013569	0.013569
H1-3	ENST00000244534.6	2.50589e-07	1.0234e-05	-1.06756	0.207002	4.36231	0.356029	0.0159109	0.00173985	0.048364	0.048364
THBS2	ENST00000617924.4	2.52204e-07	1.02919e-05	-5.43008	1.05315	4.33233	9.52622	1.61378	-0.76318	0.049896	0.049896
ZFAND1	ENST00000522520.5	2.523e-07	1.02919e-05	-0.666665	0.129299	6.08833	0.145236	0.00991048	0.00496803	0.015167	0.015167
MUC19	ENST00000454784.9	2.52536e-07	1.02955e-05	-2.76511	0.536309	3.06996	2.34324	0.148979	-0.087115	0.282461	0.282461
ARL4A	ENST00000651779.1	2.67618e-07	1.08789e-05	-0.999533	0.194275	5.11113	0.345011	0.0224379	0.0341764	0.0268804	0.0341764
RBM39	ENST00000403542.6	2.68546e-07	1.09103e-05	-5.69062	1.1062	2.1523	9.90696	1.10674	-0.866719	0.728788	0.728788
PSAT1	ENST00000376588.4	2.72141e-07	1.10435e-05	-1.12526	0.218847	9.2728	0.437339	0.000110571	0.0717304	0.0117376	0.0717304
EIF4A2	ENST00000494445.1	3.01248e-07	1.21128e-05	-0.882755	0.172323	5.13843	0.269411	0.0121725	0.0323705	0.0264069	0.0323705
CNTNAP3	ENST00000297668.10	3.02923e-07	1.21732e-05	-1.18742	0.231844	4.99425	0.487489	0.0170382	0.0635892	0.0290191	0.0635892
SLC6A15	ENST00000266682.10	3.1197e-07	1.25082e-05	-1.86451	0.364443	4.60372	1.05982	0.160572	-0.139451	0.0386557	0.0386557
DMKN	ENST00000460327.5	3.19775e-07	1.27556e-05	-4.91488	0.961552	1.76429	7.36527	0.38714	-0.239075	0.999734	0.999734
SLC34A2	ENST00000382051.8	3.50031e-07	1.38447e-05	-2.05166	0.402736	4.81964	1.45743	0.0157258	0.227569	0.0327143	0.227569
ADGRV1	ENST00000425867.3	3.51732e-07	1.39041e-05	-0.908243	0.178318	6.04477	0.285039	0.0322546	0.0147048	0.0154416	0.0154416
MATR3	ENST00000504203.5	3.58305e-07	1.4148e-05	-0.935209	0.183739	7.25952	0.302897	0.018352	0.0322882	0.0102482	0.0322882
RNF43	ENST00000577716.5	3.67185e-07	1.44905e-05	-5.59703	1.10064	2.10537	9.69139	1.05805	-0.691342	0.759082	0.759082
TRIM64	ENST00000533122.3	3.71307e-07	1.46225e-05	-4.43957	0.873396	1.84457	6.71443	0.204225	0.79765	0.940007	0.940007
RCL1	ENST00000381750.9	3.76465e-07	1.48152e-05	-0.633529	0.124698	6.15233	0.139067	0.00304297	0.0202816	0.0147848	0.0202816
POLR3G	ENST00000503373.5	3.82283e-07	1.50357e-05	-1.016	0.200096	5.42428	0.357725	0.00955848	0.0504993	0.0217491	0.0504993
CBS	ENST00000359624.7	3.84242e-07	1.50958e-05	-0.808012	0.159164	5.94177	0.204023	0.0218525	-0.0116548	0.0161473	0.0161473
PRKG1	ENST00000373980.10	3.93585e-07	1.54284e-05	-0.828887	0.163423	6.2394	0.238164	0.00404043	0.0360201	0.0142981	0.0360201
CDH3	ENST00000264012.9	4.11018e-07	1.6058e-05	-1.27044	0.250887	4.93048	0.50211	0.0641314	-0.0417495	0.0302852	0.0302852
ERP29	ENST00000455836.1	4.12869e-07	1.61214e-05	-1.12087	0.221388	6.27442	0.43572	0.0183228	0.0551961	0.0141111	0.0551961
ZNF391	ENST00000244576.8	4.14817e-07	1.61615e-05	-0.692794	0.136861	6.15513	0.166466	0.0025457	0.0255507	0.0147686	0.0255507
LAMC2	ENST00000493293.5	4.24339e-07	1.64959e-05	-1.02791	0.203238	4.9158	0.337624	0.0313692	-0.0055678	0.030589	0.030589
CD74	ENST00000353334.10	4.31562e-07	1.67489e-05	-0.644235	0.127458	6.28153	0.144006	0.00305453	0.0213139	0.0140736	0.0213139
MYEF2	ENST00000558289.5	4.32695e-07	1.67836e-05	-1.00369	0.198593	5.24551	0.349543	0.0160728	0.043086	0.0246155	0.043086
ITM2A	ENST00000373298.7	4.42926e-07	1.71238e-05	-0.692887	0.137219	5.63001	0.153104	0.00925814	0.00208646	0.0189852	0.0189852
CR2	ENST00000367057.7	4.4591e-07	1.72202e-05	-4.70428	0.931866	1.65899	6.71333	0.221054	-0.128238	1.08151	1.08151
RAB33B	ENST00000652268.1	4.59335e-07	1.76804e-05	-0.646918	0.128292	5.79708	0.143901	0.00737932	0.0155586	0.0173088	0.0173088
NKD1	ENST00000566396.1	4.64616e-07	1.78543e-05	-4.14389	0.822139	2.84902	5.96264	0.351015	0.662853	0.365215	0.662853
CHRM3	ENST00000255380.8	4.70927e-07	1.80771e-05	-0.61291	0.121662	5.76837	0.126397	0.00463444	0.0124892	0.0175682	0.0175682
TXNL4B	ENST00000268483.8	4.78838e-07	1.83507e-05	-0.615248	0.122204	5.75589	0.13148	0.00421815	0.0181825	0.0176844	0.0181825
MYO5B	ENST00000324581.10	4.84823e-07	1.85598e-05	-0.656146	0.130389	5.693	0.138372	0.00719848	0.00431901	0.0183034	0.0183034
PTPRZ1	ENST00000652054.1	4.92137e-07	1.88193e-05	-0.866315	0.172252	7.16715	0.259321	0.0340377	0.00867577	0.0104684	0.0104684
SLC2A1	ENST00000426263.8	5.06642e-07	1.93424e-05	-0.712651	0.141855	6.85369	0.176509	0.00301631	0.0271682	0.011434	0.0271682
SEC31A	ENST00000506495.5	5.20634e-07	1.9812e-05	-0.629328	0.1254	5.90587	0.137686	0.00399487	0.019593	0.0164149	0.019593
MRS2	ENST00000378386.7	5.38895e-07	2.04405e-05	-0.61639	0.122985	7.81712	0.132131	0.000773594	0.0219143	0.00946826	0.0219143
FRMD5	ENST00000417257.6	5.80408e-07	2.18735e-05	-1.31281	0.262686	5.39811	0.549732	0.081341	-0.0404737	0.022165	0.022165
EMC3-AS1	ENST00000326237.3	5.81866e-07	2.19166e-05	-0.846207	0.169338	4.79297	0.238569	0.00966194	0.0200242	0.0333512	0.0333512
SLC18B1	ENST00000275227.9	6.29332e-07	2.3528e-05	-0.617268	0.1239	6.3868	0.123409	0.00949166	0.00188699	0.0135351	0.0135351
RPL24	ENST00000464595.1	6.31662e-07	2.36025e-05	-1.11124	0.223084	4.52115	0.404978	0.0331267	0.0100238	0.0415228	0.0415228
FZD10	ENST00000539839.1	6.71759e-07	2.49642e-05	-3.45506	0.695273	2.32674	3.84681	0.101816	0.230154	0.623292	0.623292
AXIN2	ENST00000611991.1	6.74097e-07	2.50153e-05	-4.49745	0.90516	1.55558	6.10724	0.0635493	-0.014639	1.16542	1.16542
SLC17A5	ENST00000355773.6	6.78985e-07	2.51701e-05	-0.629769	0.126783	5.90724	0.138272	0.00292919	0.0211819	0.0164045	0.0211819
RPL35A	ENST00000647248.2	6.89326e-07	2.55265e-05	-0.900189	0.181331	5.36386	0.255859	0.0266114	-0.0106649	0.0227099	0.0227099
TM9SF2	ENST00000642475.1	7.83463e-07	2.87692e-05	-0.67639	0.136937	6.66006	0.159753	0.0100099	0.0181175	0.0122172	0.0181175
CD3EAP	ENST00000589804.1	7.95225e-07	2.91562e-05	-0.846222	0.17142	5.52737	0.250089	0.0209611	0.0231163	0.0202502	0.0231163
DACT1	ENST00000421793.5	8.00792e-07	2.9345e-05	-1.47422	0.298717	4.32915	0.759076	0.0495797	0.0842681	0.0500636	0.0842681
MALL	ENST00000272462.2	8.33929e-07	3.05116e-05	-1.25462	0.254629	4.12252	0.544841	0.0335126	0.0572627	0.0637409	0.0637409
CHST7	ENST00000276055.3	8.36223e-07	3.05796e-05	-1.13038	0.229438	4.82456	0.446495	0.00895612	0.0700064	0.0325992	0.0700064
ABRAXAS1	ENST00000321945.12	8.74171e-07	3.19009e-05	-0.740213	0.15051	5.48979	0.175614	0.0132122	0.000837103	0.0207677	0.0207677
NRROS	ENST00000328557.5	8.84537e-07	3.22624e-05	-1.6769	0.341131	3.61734	0.850561	0.0394912	-0.0307933	0.135064	0.135064
MRPL43	ENST00000318325.6	8.93647e-07	3.2544e-05	-0.88672	0.180458	4.6521	0.260168	0.0116985	0.0186592	0.0371491	0.0371491
ZNF165	ENST00000377325.2	8.95841e-07	3.2607e-05	-0.748941	0.152433	5.054	0.185748	0.00695331	0.0148888	0.0279006	0.0279006
ECPAS	ENST00000602447.5	8.97113e-07	3.26364e-05	-0.730257	0.148639	6.00725	0.177608	0.0174515	0.0045805	0.0156888	0.0156888
OLFM2	ENST00000264833.8	9.82486e-07	3.53942e-05	-0.628796	0.128454	6.48136	0.127222	0.0116823	-0.000924535	0.0130683	0.0130683
UBE2D2	ENST00000398734.8	9.92443e-07	3.57163e-05	-0.718331	0.146804	6.05499	0.167457	0.0169511	-0.00113038	0.015376	0.015376
HCN2	ENST00000251287.3	9.93104e-07	3.57218e-05	-0.763491	0.156037	5.1686	0.204093	0.0060819	0.0304396	0.0258927	0.0304396
FBXL6	ENST00000331890.6	1.04388e-06	3.74143e-05	-0.93683	0.191848	4.61725	0.28812	0.0169864	0.0140454	0.0382222	0.0382222
FBXL6	ENST00000644788.2	1.04388e-06	3.74143e-05	-0.93683	0.191848	4.61725	0.28812	0.0169864	0.0140454	0.0382222	0.0382222
BLOC1S2	ENST00000370372.7	1.09337e-06	3.90287e-05	-0.665609	0.136562	5.81974	0.138345	0.0108624	-0.00406911	0.0171114	0.0171114
PAPPA2	ENST00000367662.5	1.17249e-06	4.16416e-05	-0.89387	0.183915	5.07747	0.280291	0.00670357	0.0440336	0.0274762	0.0440336
SURF2	ENST00000371964.5	1.18137e-06	4.19145e-05	-0.716522	0.147471	4.98735	0.162677	0.00346916	0.00735008	0.0291523	0.0291523
SURF2	ENST00000630633.2	1.18137e-06	4.19145e-05	-0.716522	0.147471	4.98735	0.162677	0.00346916	0.00735008	0.0291523	0.0291523
PIAS2	ENST00000585916.6	1.22051e-06	4.31942e-05	-0.601439	0.12395	5.69261	0.11871	0.00473791	0.00800099	0.0183075	0.0183075
LMO7	ENST00000465261.6	1.24883e-06	4.41297e-05	-1.9125	0.394515	5.05473	1.28407	0.0815671	0.151896	0.0278872	0.151896
OSBPL10	ENST00000438237.6	1.28714e-06	4.54149e-05	-0.748518	0.154597	5.55349	0.196764	0.00839376	0.0274567	0.0199084	0.0274567
GPM6B	ENST00000316715.9	1.35946e-06	4.77523e-05	-0.770925	0.159584	5.94296	0.208858	0.00767792	0.0305224	0.0161386	0.0305224
CCNC	ENST00000627680.2	1.36388e-06	4.7852e-05	-0.956608	0.198047	4.67997	0.309411	0.0225012	0.0210998	0.0363326	0.0363326
ADAMTSL2	ENST00000393060.1	1.36321e-06	4.7852e-05	-4.56216	0.944486	2.11417	6.59645	0.584739	-0.14417	0.753343	0.753343
ZNF195	ENST00000429541.6	1.37235e-06	4.81074e-05	-0.853898	0.176828	5.81483	0.244551	0.0297485	0.00251141	0.0171537	0.0171537
PRKAG1	ENST00000548065.6	1.37745e-06	4.82622e-05	-0.592707	0.122758	6.71456	0.123474	0.00537889	0.0172256	0.0119811	0.0172256
H3Y1	ENST00000598383.2	1.38843e-06	4.85742e-05	-3.6637	0.759054	2.34473	4.37115	0.251168	0.17927	0.613077	0.613077
SRI	ENST00000394641.7	1.39271e-06	4.86997e-05	-0.655713	0.13587	6.28185	0.15114	0.0113515	0.0163393	0.0140719	0.0163393
TRIM49C	ENST00000448984.1	1.39392e-06	4.8718e-05	-4.54628	0.942064	2.61643	7.26558	0.183343	1.14788	0.470611	1.14788
LIAS	ENST00000340169.7	1.3998e-06	4.88991e-05	-1.1629	0.241014	5.06754	0.450406	0.0594768	-0.00359555	0.0276548	0.0276548
BBS9	ENST00000627264.1	1.42559e-06	4.97504e-05	-1.51109	0.313413	4.81787	0.80289	0.0158047	0.131537	0.0327558	0.131537
MRPL4	ENST00000307422.9	1.44655e-06	5.04068e-05	-1.03367	0.214521	5.93348	0.338257	0.0528211	-0.0306749	0.016208	0.016208
OR7E12P	ENST00000344740.4	1.49827e-06	5.2003e-05	-0.629521	0.130838	5.46914	0.119936	0.00461195	-0.00330332	0.0210658	0.0210658
ATXN2L	ENST00000562583.5	1.51447e-06	5.24875e-05	-1.09591	0.227872	5.40907	0.422617	0.0170342	0.0608546	0.0219907	0.0608546
PDCD2	ENST00000541970.5	1.5191e-06	5.26221e-05	-0.705472	0.146707	6.08354	0.175135	0.00535053	0.026934	0.0151966	0.026934
TCTA	ENST00000273590.3	1.53842e-06	5.32126e-05	-0.705363	0.146762	5.28304	0.175108	0.00555122	0.0267573	0.0240055	0.0267573
TXNL4A	ENST00000588162.1	1.61715e-06	5.57495e-05	-0.746361	0.155616	5.2204	0.17824	0.0112964	0.00260797	0.0250279	0.0250279
COL14A1	ENST00000434620.5	1.62058e-06	5.58346e-05	-4.43665	0.925118	2.82897	6.53048	0.910181	-0.128512	0.373585	0.373585
USP7	ENST00000344836.9	1.62517e-06	5.59653e-05	-0.66264	0.138188	6.77944	0.154643	0.00595998	0.0226841	0.0117162	0.0226841
GRHL1	ENST00000324907.14	1.71075e-06	5.86548e-05	-1.17149	0.244831	4.40397	0.483649	0.0310853	0.0588282	0.0463736	0.0588282
ANKHD1	ENST00000394723.7	1.71078e-06	5.86548e-05	-1.13499	0.237203	5.9484	0.453978	0.0188094	0.0655882	0.0160992	0.0655882
LRRC8D	ENST00000394593.7	1.7755e-06	6.06959e-05	-0.726881	0.152149	7.14368	0.186286	0.00151622	0.0332077	0.0105288	0.0332077
COL14A1	ENST00000297848.8	1.81645e-06	6.19151e-05	-2.9026	0.608149	4.22212	2.97134	0.479476	0.0752923	0.056351	0.0752923
TSKU	ENST00000527881.1	1.89565e-06	6.4521e-05	-0.64835	0.136087	6.01459	0.148331	0.00685612	0.0209233	0.0156396	0.0209233
RAG1	ENST00000299440.5	1.90726e-06	6.48535e-05	-1.29084	0.271014	4.61385	0.58802	0.0166401	0.0935328	0.0383303	0.0935328
TLL2	ENST00000469598.1	1.92228e-06	6.53324e-05	-3.10997	0.653158	3.08118	3.06189	0.361194	-0.160792	0.27873	0.27873
KIAA1522	ENST00000401073.7	1.9378e-06	6.57963e-05	-1.33278	0.280008	6.61122	0.62698	0.0297141	0.0878928	0.0124397	0.0878928
MRPS12	ENST00000402029.3	2.02248e-06	6.84072e-05	-0.801832	0.168765	4.8351	0.210508	0.0103675	0.0116672	0.0323551	0.0323551
MRPS12	ENST00000634400.1	2.02248e-06	6.84072e-05	-0.801832	0.168765	4.8351	0.210508	0.0103675	0.0116672	0.0323551	0.0323551
KCNJ8	ENST00000240662.3	2.02579e-06	6.84862e-05	-1.77387	0.37338	3.50724	1.07994	0.0498325	0.120115	0.159287	0.159287
ACVR1C	ENST00000243349.13	2.05041e-06	6.92186e-05	-1.29578	0.272889	3.91998	0.514567	0.0267427	-0.0131774	0.0849595	0.0849595
F13A1	ENST00000264870.7	2.07063e-06	6.9834e-05	-1.67806	0.353543	3.78478	0.994756	0.032386	0.155103	0.104414	0.155103
ERVW-1	ENST00000603704.1	2.14342e-06	7.21159e-05	-1.21027	0.255363	4.7338	0.517678	0.0168581	0.0809572	0.0348509	0.0809572
NA	ENST00000652215.1	2.17988e-06	7.32024e-05	-0.990842	0.209215	4.44644	0.347056	0.0119599	0.0536968	0.0444962	0.0536968
WSCD1	ENST00000317744.9	2.20671e-06	7.39973e-05	-1.30499	0.275692	6.59617	0.602107	0.00874811	0.105261	0.0125104	0.105261
RGMB	ENST00000308234.11	2.21944e-06	7.43399e-05	-1.80353	0.381108	6.47487	1.15011	0.0473029	0.170562	0.0131	0.170562
DNAH9	ENST00000396001.6	2.23947e-06	7.48816e-05	-4.38071	0.926053	1.53807	5.83483	0.106397	-0.00934754	1.17996	1.17996
NUP37	ENST00000552283.6	2.25198e-06	7.52641e-05	-0.969998	0.2051	4.72954	0.332748	0.0240287	0.0390704	0.0349639	0.0390704
EEF1E1	ENST00000379715.10	2.26575e-06	7.56884e-05	-0.58885	0.124541	6.31753	0.122636	0.00287088	0.020395	0.0138863	0.020395
GLS2	ENST00000311966.9	2.28138e-06	7.61744e-05	-2.01065	0.425376	4.98707	1.24308	0.24226	-0.204426	0.0291577	0.0291577
ZFHX3	ENST00000268489.10	2.29731e-06	7.66696e-05	-1.96412	0.415657	5.04262	1.36466	0.147318	0.111838	0.0281091	0.111838
ADGRE2	ENST00000315576.8	2.30539e-06	7.69029e-05	-1.29182	0.273423	3.96939	0.535788	0.0331876	0.0107459	0.0789526	0.0789526
BNIP3	ENST00000633835.1	2.38586e-06	7.94741e-05	-0.743807	0.157665	6.08928	0.195804	0.00668556	0.0306017	0.0151611	0.0306017
MACC1	ENST00000332878.8	2.42008e-06	8.04995e-05	-1.0742	0.227837	5.00683	0.408462	0.0368374	0.0410275	0.0287785	0.0410275
ALK	ENST00000389048.8	2.47833e-06	8.23201e-05	-4.35452	0.924545	1.48411	5.72321	0.0568081	-0.0134953	1.22537	1.22537
CACNA1B	ENST00000277549.9	2.47742e-06	8.23201e-05	-5.34252	1.1343	3.11921	10.1067	1.12755	0.802396	0.266411	0.802396
CMSS1	ENST00000421999.8	2.48078e-06	8.23626e-05	-0.586859	0.124606	5.72476	0.112072	0.00530665	0.00563206	0.0179835	0.0179835
NOP2	ENST00000322166.9	2.50065e-06	8.29061e-05	-0.633223	0.134497	7.03912	0.141999	0.0114328	0.0157014	0.0108205	0.0157014
UNC5D	ENST00000404895.7	2.55295e-06	8.44395e-05	-0.827368	0.175891	6.99177	0.242487	0.0130216	0.0333851	0.0109652	0.0333851
PHACTR1	ENST00000332995.11	2.58898e-06	8.55107e-05	-0.748897	0.159306	4.79361	0.173948	0.00473205	0.00238567	0.0333356	0.0333356
NA	ENST00000634438.1	2.58898e-06	8.55107e-05	-0.748897	0.159306	4.79361	0.173948	0.00473205	0.00238567	0.0333356	0.0333356
PDLIM3	ENST00000284771.6	2.60019e-06	8.58406e-05	-1.47982	0.314847	4.07238	0.77045	0.0805111	0.0613539	0.068182	0.068182
PIK3CB	ENST00000477593.5	2.67438e-06	8.80416e-05	-0.615343	0.131081	7.51339	0.134213	0.00130601	0.0244675	0.00978044	0.0244675
SERPINB1	ENST00000380739.6	2.72107e-06	8.94529e-05	-1.02124	0.21771	4.92545	0.369756	0.0118636	0.0592329	0.0303887	0.0592329
DKK4	ENST00000220812.3	2.7328e-06	8.97965e-05	-5.67833	1.21075	2.50892	11.4321	0.0904065	2.10845	0.524827	2.10845
CGAS	ENST00000370315.4	2.74063e-06	8.99276e-05	-1.61207	0.343771	4.11079	0.921441	0.0214353	0.155832	0.0647352	0.155832
PTGES3	ENST00000614328.4	2.77593e-06	9.09477e-05	-0.863956	0.184341	5.65299	0.248239	0.0322435	-0.00185195	0.0187288	0.0187288
SHC3	ENST00000375835.9	2.77689e-06	9.09477e-05	-1.12104	0.239197	4.11147	0.423388	0.0211465	0.0368174	0.0646763	0.0646763
LDB2	ENST00000507464.5	2.78469e-06	9.11267e-05	-0.87897	0.18757	5.32538	0.273995	0.0197427	0.0330309	0.0233246	0.0330309
DHODH	ENST00000219240.9	2.78952e-06	9.12338e-05	-0.594238	0.126818	5.61112	0.112868	0.00492143	0.00374359	0.0192029	0.0192029
THAP1	ENST00000254250.7	2.81812e-06	9.20408e-05	-0.591984	0.126394	5.58824	0.106177	0.00448772	-0.00318288	0.0194753	0.0194753
PHGDH	ENST00000641756.1	2.8379e-06	9.26437e-05	-4.60391	0.983276	1.60881	6.71728	0.328451	0.119649	1.1218	1.1218
ESYT2	ENST00000275418.12	2.93543e-06	9.54288e-05	-1.03084	0.220488	7.05338	0.377129	0.00196313	0.070959	0.0107785	0.070959
SMARCA2	ENST00000416751.2	2.93437e-06	9.54288e-05	-4.0618	0.868767	2.75695	5.73533	0.727326	0.255004	0.404807	0.404807
FHL1	ENST00000651929.1	2.96267e-06	9.62251e-05	-1.04555	0.223724	6.63336	0.388015	0.042472	0.0326066	0.0123375	0.0326066
GRIN2A	ENST00000396573.6	2.96772e-06	9.63448e-05	-0.922455	0.197399	5.38009	0.302037	0.0116635	0.0467862	0.0224515	0.0467862
TM7SF3	ENST00000545344.5	2.97265e-06	9.64258e-05	-1.13784	0.243507	5.04543	0.459556	0.0163966	0.072547	0.0280573	0.072547
TCP1	ENST00000543532.5	2.97723e-06	9.64751e-05	-0.819721	0.17544	5.09237	0.236952	0.0189579	0.0252537	0.0272107	0.0272107
ADAMTS19	ENST00000505791.5	2.99939e-06	9.6925e-05	-2.44756	0.524007	3.35921	1.80515	0.215221	-0.205249	0.196655	0.196655
EFEMP1	ENST00000634374.1	3.07431e-06	9.90727e-05	-2.7599	0.591517	4.92842	2.70498	0.206866	0.317972	0.0303276	0.317972
FLT4	ENST00000261937.11	3.09e-06	9.94873e-05	-1.05009	0.225113	5.07502	0.391619	0.0111146	0.064899	0.02752	0.064899
PCCB	ENST00000471595.5	3.15382e-06	0.000101449	-0.731429	0.156941	5.37403	0.177972	0.0143977	0.00744741	0.0225479	0.0225479
DDT	ENST00000350608.7	3.20504e-06	0.000102861	-0.592768	0.127279	5.53408	0.115589	0.00413912	0.00858134	0.0201609	0.0201609
DDT	ENST00000615721.3	3.20504e-06	0.000102861	-0.592768	0.127279	5.53408	0.115589	0.00413912	0.00858134	0.0201609	0.0201609
SNAI3	ENST00000332281.6	3.24281e-06	0.000104026	-0.853154	0.183284	4.6101	0.244503	0.0119398	0.0207377	0.0384499	0.0384499
BICD1	ENST00000551848.1	3.24897e-06	0.000104176	-0.873822	0.18774	4.96761	0.271365	0.0124417	0.0404279	0.0295381	0.0404279
RARRES2	ENST00000467793.5	3.27438e-06	0.000104847	-1.00328	0.215629	4.63741	0.350152	0.0321493	0.0280763	0.0375944	0.0375944
LSR	ENST00000354900.7	3.3756e-06	0.000107892	-0.620667	0.133576	6.81824	0.136979	0.0145027	0.0122612	0.011566	0.0122612
USP37	ENST00000258399.8	3.50659e-06	0.000111774	-0.6238	0.134478	6.27186	0.132865	0.013002	0.00715628	0.0141246	0.0141246
ACAA1	ENST00000333167.13	3.57395e-06	0.000113663	-0.805889	0.17388	5.98786	0.231118	0.00443625	0.0409153	0.0158208	0.0409153
NIPA2	ENST00000359727.8	3.78433e-06	0.000119596	-0.903648	0.195473	5.31515	0.257419	0.0338258	-0.01827	0.0234885	0.0234885
ADD2	ENST00000355733.7	3.88555e-06	0.00012274	-4.2245	0.914906	2.27969	6.35838	0.51446	0.741119	0.650607	0.741119
SYT1	ENST00000261205.9	3.96426e-06	0.000125057	-0.734431	0.1592	6.2574	0.19223	0.00187276	0.0361444	0.0142014	0.0361444
GRAMD1A	ENST00000411896.6	3.97401e-06	0.000125252	-0.680958	0.147626	6.74094	0.165263	0.0102711	0.0224189	0.0118713	0.0224189
FKBP11	ENST00000550765.6	4.01818e-06	0.000126515	-1.08292	0.234883	4.77962	0.418016	0.031199	0.0515563	0.0336787	0.0515563
NANOG	ENST00000526434.2	4.06869e-06	0.000127835	-1.56438	0.339505	4.14904	0.872505	0.0719558	0.100939	0.0615923	0.100939
RASGRF2	ENST00000503795.1	4.11121e-06	0.000128989	-4.16353	0.903999	2.22852	6.18114	0.455137	0.770683	0.681285	0.770683
EIF1	ENST00000469257.2	4.15669e-06	0.000130251	-0.61244	0.133041	5.89531	0.130429	0.0100538	0.0123264	0.0164961	0.0164961
HRH3	ENST00000340177.10	4.21912e-06	0.000131972	-1.82294	0.396266	3.39689	1.03702	0.0488824	0.00122256	0.186658	0.186658
PMAIP1	ENST00000269518.9	4.23102e-06	0.000132226	-0.667355	0.145087	6.57282	0.158869	0.00736554	0.0242097	0.0126221	0.0242097
HNRNPA2B1	ENST00000618183.4	4.29536e-06	0.000133939	-0.967275	0.210435	6.172	0.289855	0.0517525	-0.0402924	0.0146718	0.0146718
CHORDC1	ENST00000320585.11	4.43137e-06	0.000137695	-0.855378	0.186355	4.75708	0.24908	0.0178464	0.0191269	0.0342457	0.0342457
CHORDC1	ENST00000646618.2	4.43137e-06	0.000137695	-0.855378	0.186355	4.75708	0.24908	0.0178464	0.0191269	0.0342457	0.0342457
NIPA2	ENST00000337451.7	4.49774e-06	0.000139569	-1.15538	0.251884	6.43043	0.476605	0.0131964	0.0819719	0.0133184	0.0819719
WIPF3	ENST00000242140.9	4.5478e-06	0.000140936	-1.74603	0.380844	5.46159	0.953321	0.196386	-0.147965	0.0211772	0.0211772
LANCL2	ENST00000452107.6	4.56895e-06	0.000141529	-0.757458	0.165252	5.21115	0.186997	0.0157814	0.00281142	0.0251808	0.0251808
VWCE	ENST00000335613.10	4.60656e-06	0.000142568	-0.643326	0.140404	5.74133	0.147817	0.0065175	0.0230526	0.0178226	0.0230526
THEM4	ENST00000471464.5	4.65211e-06	0.000143851	-0.677128	0.147848	5.36479	0.157805	0.0100934	0.015225	0.0226951	0.0226951
RBP1	ENST00000483943.6	4.71142e-06	0.00014541	-2.72714	0.595804	2.76907	2.40555	0.133041	0.0849145	0.399432	0.399432
ARHGAP33	ENST00000587447.3	4.81164e-06	0.000148327	-0.763287	0.166918	5.28053	0.189543	0.017746	0.000705135	0.0240462	0.0240462
MDM2	ENST00000539479.6	4.91439e-06	0.000151176	-0.661847	0.144875	6.61722	0.156599	0.004847	0.026636	0.0124118	0.026636
FAM90A27P	ENST00000593323.1	4.94238e-06	0.000151958	-3.70116	0.810375	1.88543	4.86196	0.074632	0.865857	0.910429	0.910429
TRIM49	ENST00000329758.5	4.95465e-06	0.000152239	-4.48351	0.981784	1.77265	6.41849	0.452439	0.0324594	0.993412	0.993412
LRP11	ENST00000239367.6	5.00383e-06	0.000153511	-0.585755	0.128325	5.68939	0.122693	0.00392098	0.0207799	0.0183407	0.0207799
SLC22A23	ENST00000436008.6	5.01017e-06	0.000153639	-0.844909	0.18511	5.29766	0.224444	0.0276288	-0.0147751	0.0237697	0.0237697
TCF7	ENST00000522653.5	5.01295e-06	0.000153657	-0.881694	0.193174	4.65116	0.247033	0.0187969	-0.00152478	0.0371774	0.0371774
PCK2	ENST00000216780.8	5.12231e-06	0.00015649	-1.1303	0.247887	7.13179	0.457008	0.000723192	0.091449	0.0105601	0.091449
ERVMER34-1	ENST00000440542.1	5.12319e-06	0.00015649	-1.11398	0.244311	5.1974	0.44391	0.0149751	0.0745566	0.0254093	0.0745566
PCK2	ENST00000645217.1	5.12231e-06	0.00015649	-1.1303	0.247887	7.13179	0.457008	0.000723192	0.091449	0.0105601	0.091449
ZDHHC14	ENST00000341375.12	5.17906e-06	0.000157922	-4.48942	0.985083	1.55156	6.10003	0.286833	-0.219869	1.16875	1.16875
PIAS2	ENST00000398654.7	5.25751e-06	0.000160175	-0.629945	0.13832	5.64227	0.130866	0.00985151	0.00491957	0.0188473	0.0188473
RMND5B	ENST00000542098.2	5.28711e-06	0.000160868	-0.661948	0.145385	5.53495	0.141419	0.0115558	0.000902519	0.0201495	0.0201495
TESMIN	ENST00000443940.6	5.30108e-06	0.000161223	-0.621155	0.136442	5.39547	0.116706	0.00571793	-0.00452268	0.0222069	0.0222069
PCNX2	ENST00000344698.6	5.32793e-06	0.000161969	-0.651844	0.143217	5.29052	0.140317	0.00688194	0.00917676	0.0238847	0.0238847
GPT2	ENST00000340124.9	5.45845e-06	0.000165437	-0.784053	0.172458	7.95004	0.220112	0.000578341	0.0440342	0.00941254	0.0440342
EIF4A2	ENST00000426808.5	5.47192e-06	0.000165773	-0.870939	0.191591	7.09445	0.271609	0.0238639	0.0311966	0.0106615	0.0311966
CD44	ENST00000433892.6	5.487e-06	0.000166087	-2.33003	0.512629	5.02772	1.7365	0.365797	-0.231059	0.0283853	0.0283853
KCNMA1	ENST00000286627.10	5.50084e-06	0.000166362	-4.78798	1.05353	1.96612	6.97386	0.81163	-0.691094	0.853246	0.853246
METTL21A	ENST00000406927.6	5.53717e-06	0.000167174	-0.830813	0.182864	5.27725	0.234535	0.0260597	0.00826478	0.0240992	0.0240992
RAB39A	ENST00000320578.3	5.541e-06	0.000167217	-0.83292	0.183334	4.93763	0.24846	0.00841787	0.0419991	0.030139	0.0419991
LSM4	ENST00000593829.5	5.80766e-06	0.000174292	-0.858396	0.189354	5.12189	0.228892	0.0270899	-0.0172907	0.0266928	0.0266928
SSTR1	ENST00000267377.3	5.93856e-06	0.000177992	-1.06188	0.234485	4.39849	0.404256	0.0151064	0.0673682	0.046627	0.0673682
TARS1	ENST00000265112.7	5.94352e-06	0.000178065	-1.25222	0.276526	5.44671	0.562174	0.0152123	0.0994877	0.0214011	0.0994877
GPD1L	ENST00000282541.9	5.95419e-06	0.000178309	-0.819018	0.180878	4.89669	0.22556	0.0180833	0.0123198	0.0309921	0.0309921
TMEM161B	ENST00000296595.10	6.01757e-06	0.0001799	-0.897663	0.198345	5.06918	0.246386	0.0313857	-0.0255776	0.0276252	0.0276252
SCARB1	ENST00000261693.11	6.05408e-06	0.000180915	-4.6108	1.01908	1.61225	6.39768	0.438772	-0.413984	1.119	1.119
CBWD3	ENST00000618921.4	6.18783e-06	0.000184441	-0.728863	0.161258	5.02149	0.179134	0.0105043	0.0141976	0.0285018	0.0285018
ITGA2	ENST00000296585.10	6.21325e-06	0.00018512	-1.05386	0.233206	5.4226	0.398449	0.00788476	0.0736931	0.0217756	0.0736931
CKMT1A	ENST00000479938.1	6.33758e-06	0.000188266	-1.13494	0.251382	4.08333	0.455333	0.0276202	0.0585131	0.067169	0.067169
PUS1	ENST00000443358.6	6.40735e-06	0.000190017	-0.772586	0.171211	5.99427	0.214243	0.0199065	0.0240633	0.0157769	0.0240633
UPF3A	ENST00000619079.1	6.58279e-06	0.000194973	-0.648898	0.143983	5.19115	0.132776	0.00558328	0.00248612	0.0255136	0.0255136
SESN1	ENST00000356644.7	6.66939e-06	0.000197206	-1.36873	0.303893	5.91939	0.672845	0.0203301	0.118196	0.0163127	0.118196
RGS16	ENST00000367558.6	6.75841e-06	0.000199586	-0.841102	0.186864	6.36131	0.254137	0.0022258	0.0501512	0.0136631	0.0501512
SERAC1	ENST00000647468.2	6.7742e-06	0.000199968	-0.606511	0.13476	5.79109	0.132149	0.0088965	0.0183441	0.017362	0.0183441
SPINT1	ENST00000344051.8	6.9238e-06	0.000203995	-0.605762	0.134733	6.09633	0.12823	0.0121116	0.0105706	0.0151179	0.0151179
SOHLH2	ENST00000379881.8	7.03245e-06	0.000206983	-0.965955	0.215005	4.57118	0.335394	0.016504	0.052837	0.0397381	0.052837
VCAN	ENST00000265077.8	7.04742e-06	0.000207337	-1.13162	0.251905	8.86694	0.460318	0.000690225	0.0944942	0.0104015	0.0944942
DSCC1	ENST00000313655.5	7.20464e-06	0.000211697	-0.587581	0.130936	6.91711	0.124148	0.001102	0.0246142	0.0112098	0.0246142
ZNF878	ENST00000547628.1	7.2617e-06	0.000213017	-0.989577	0.220599	4.24646	0.326081	0.0181919	0.0221863	0.0548038	0.0548038
PLP2	ENST00000376327.6	7.26953e-06	0.000213158	-0.63372	0.141278	5.26134	0.134729	0.00558164	0.0122292	0.0243574	0.0243574
UNC93A	ENST00000503433.5	7.34706e-06	0.000215221	-4.20112	0.937044	1.40741	5.5449	0.0257158	0.286884	1.29136	1.29136
AGFG2	ENST00000474713.1	7.45502e-06	0.000218142	-1.28459	0.286722	3.99799	0.523752	0.0475839	-0.0117064	0.07573	0.07573
PI15	ENST00000260113.7	7.55457e-06	0.000220687	-1.54494	0.34505	3.6288	0.745627	0.0458641	-0.00889572	0.132726	0.132726
FNDC3A	ENST00000492622.6	7.56595e-06	0.000220928	-0.700249	0.156406	6.6253	0.17646	0.0176284	0.019066	0.0123745	0.019066
SYT9	ENST00000318881.11	7.70243e-06	0.000224261	-1.49235	0.333613	4.5938	0.779814	0.127967	0.011638	0.0389795	0.0389795
CHMP4C	ENST00000297265.5	7.89996e-06	0.000229063	-1.04712	0.234366	5.40834	0.394849	0.0050722	0.0773186	0.0220022	0.0773186
TRABD2A	ENST00000409520.7	7.9207e-06	0.00022957	-2.70816	0.606216	3.95735	2.64123	0.352142	0.199104	0.0803646	0.199104
MET	ENST00000397752.7	8.09695e-06	0.00023381	-0.795813	0.178329	5.5761	0.228157	0.0101055	0.0375964	0.019624	0.0375964
SMARCA2	ENST00000457226.2	8.20702e-06	0.000236794	-3.97705	0.891773	2.05746	5.69938	0.338646	0.854241	0.790779	0.854241
ALDH1L2	ENST00000258494.14	8.31161e-06	0.000239713	-2.56399	0.575274	5.51496	2.21841	0.475992	-0.168248	0.0204176	0.0204176
DCAF13	ENST00000616836.4	8.46551e-06	0.000243652	-1.12855	0.253432	4.66394	0.420016	0.0595435	-0.0121304	0.036798	0.036798
CHAC2	ENST00000295304.5	8.56457e-06	0.000246158	-0.709638	0.159449	4.94901	0.181007	0.00822722	0.0291863	0.0299088	0.0299088
WARS1	ENST00000557135.5	8.64417e-06	0.000248286	-0.659511	0.148252	6.63039	0.145024	0.0206169	-0.00244444	0.0123511	0.0123511
H2BC18	ENST00000369167.2	8.66603e-06	0.000248812	-0.82123	0.184628	4.64979	0.232697	0.0139127	0.024051	0.0372184	0.0372184
JAKMIP2	ENST00000507343.1	8.79939e-06	0.000251921	-3.96144	0.891262	1.90315	5.66112	0.265607	0.925916	0.897726	0.925916
SLC1A5	ENST00000542575.6	8.8297e-06	0.000252583	-0.59596	0.134104	8.34492	0.128131	0.000568873	0.026407	0.00953473	0.026407
POTEF	ENST00000409914.6	8.91551e-06	0.00025483	-0.862467	0.194165	4.80882	0.268395	0.010522	0.046028	0.0329699	0.046028
LIAS	ENST00000638430.1	8.98909e-06	0.000256724	-0.927767	0.208949	4.97995	0.289361	0.0361935	0.00272631	0.0292959	0.0292959
RASSF4	ENST00000340258.10	9.03417e-06	0.000257593	-1.5598	0.351378	5.02416	0.878049	0.0283437	0.156856	0.0284519	0.156856
NEFM	ENST00000221166.10	9.15434e-06	0.000260491	-1.26081	0.284207	5.81465	0.573821	0.0140589	0.107102	0.0171552	0.107102
LHX4	ENST00000263726.4	9.23077e-06	0.000262241	-2.78232	0.627434	4.70412	2.7948	0.0203362	0.570173	0.0356529	0.570173
NUDCD1	ENST00000519607.5	9.3867e-06	0.000266133	-0.649632	0.146616	6.25087	0.152402	0.014929	0.0173154	0.0142364	0.0173154
TBXT	ENST00000366876.6	9.63926e-06	0.000272799	-3.61459	0.816837	4.53241	4.72026	0.28245	0.718384	0.0411078	0.718384
SMARCA2	ENST00000636559.1	9.83437e-06	0.000277817	-4.94313	1.11816	3.30443	8.1177	1.6637	-0.679505	0.211712	0.211712
SUPT16H	ENST00000555943.1	1.01239e-05	0.000285308	-1.53978	0.348799	3.57578	0.745487	0.0386604	0.00410623	0.143831	0.143831
ZNF485	ENST00000361807.8	1.0541e-05	0.000295639	-0.709946	0.16114	4.88709	0.166842	0.0077513	0.0117918	0.0311979	0.0311979
NA	ENST00000619417.1	1.05836e-05	0.000296481	-3.08962	0.701405	4.2068	3.39402	0.680584	-0.0177112	0.0573698	0.0573698
ZBTB8OS	ENST00000468695.5	1.07346e-05	0.00030035	-0.860951	0.19559	4.66702	0.225547	0.0206752	-0.0167054	0.0367078	0.0367078
MNS1	ENST00000260453.4	1.07414e-05	0.000300422	-0.718959	0.163337	5.63829	0.187085	0.00406377	0.0359548	0.0188917	0.0359548
HERC3	ENST00000452979.5	1.09143e-05	0.000304893	-4.16492	0.946955	1.38931	5.30623	0.0379145	0.0899229	1.30717	1.30717
NKD1	ENST00000564336.1	1.09308e-05	0.000305111	-3.91101	0.889291	1.86138	5.0752	0.258471	0.349546	0.927787	0.927787
RFPL4B	ENST00000441065.3	1.10065e-05	0.000307103	-3.94352	0.89699	1.63544	5.39311	0.106571	0.803052	1.10032	1.10032
RGMB	ENST00000434027.2	1.12176e-05	0.00031225	-1.93005	0.439419	4.29363	1.34923	0.0313741	0.25826	0.0520076	0.25826
TRIM49	ENST00000532501.2	1.1285e-05	0.00031387	-4.40963	1.00425	1.51167	5.94271	0.310705	-0.174114	1.20207	1.20207
INSM1	ENST00000310227.3	1.12892e-05	0.00031387	-1.6676	0.379788	3.44505	0.97368	0.042009	0.132254	0.174349	0.174349
POLR3E	ENST00000418581.6	1.16948e-05	0.000324249	-1.0241	0.233642	5.4834	0.380142	0.0400038	0.0418793	0.0208588	0.0418793
NA	ENST00000638476.1	1.16948e-05	0.000324249	-1.0241	0.233642	5.4834	0.380142	0.0400038	0.0418793	0.0208588	0.0418793
CKMT1B	ENST00000437534.3	1.17063e-05	0.000324438	-0.950143	0.21678	4.63967	0.317905	0.0329651	0.025877	0.0375252	0.0375252
CARS1	ENST00000531387.5	1.17236e-05	0.00032479	-5.6124	1.28059	2.11342	9.5561	1.70604	-1.57306	0.753827	0.753827
ETV4	ENST00000393664.6	1.17291e-05	0.000324814	-0.699173	0.159535	6.61785	0.176861	0.0257682	0.011992	0.0124089	0.0124089
ADAMTS16	ENST00000511368.5	1.17768e-05	0.00032588	-2.71767	0.620236	3.65211	2.43014	0.448955	-0.180937	0.128084	0.128084
LRAT	ENST00000510733.1	1.20148e-05	0.000331942	-2.22369	0.508003	6.30068	1.79312	0.0750726	0.312028	0.0139735	0.312028
RAB3IP	ENST00000551641.5	1.23391e-05	0.000339966	-0.670807	0.15345	5.348	0.159402	0.0123574	0.0181516	0.0229629	0.0229629
ESYT2	ENST00000251527.10	1.26194e-05	0.000347008	-0.908103	0.207965	6.21304	0.299295	0.00392804	0.0609464	0.0144419	0.0609464
RSKR	ENST00000579457.1	1.27564e-05	0.000350143	-0.790179	0.181057	4.63876	0.198909	0.0116197	0.00287292	0.037553	0.037553
ZFAND2A	ENST00000316495.7	1.31184e-05	0.000359323	-0.627364	0.143953	5.25264	0.128145	0.00658452	0.00600284	0.0244991	0.0244991
PCSK9	ENST00000302118.5	1.35093e-05	0.00036911	-1.09113	0.250738	7.28103	0.432614	0.000804172	0.0934999	0.0102009	0.0934999
SLC34A2	ENST00000645788.1	1.35763e-05	0.000370711	-4.20216	0.96588	1.40793	5.65054	0.108477	0.332892	1.29091	1.29091
PRKAR1A	ENST00000392710.8	1.37155e-05	0.000374222	-5.79024	1.33159	2.58182	10.4545	2.17197	-1.67642	0.48773	0.48773
TIMM21	ENST00000579071.1	1.38262e-05	0.000376366	-0.668991	0.153911	5.1633	0.14747	0.00955073	0.00695612	0.0259823	0.0259823
AK4	ENST00000327299.8	1.38562e-05	0.000377036	-1.03911	0.239089	7.73719	0.39252	0.00751888	0.0782261	0.00952524	0.0782261
HACD3	ENST00000624437.1	1.39689e-05	0.000379955	-0.628596	0.144693	5.28091	0.120241	0.00736403	-0.00523796	0.02404	0.02404
C12orf45	ENST00000622317.5	1.46869e-05	0.000398251	-0.714934	0.164985	5.02145	0.184346	0.0123274	0.0264307	0.0285025	0.0285025
CD8B	ENST00000390655.11	1.47468e-05	0.000399261	-1.34913	0.311402	3.76339	0.64933	0.0375407	0.0915672	0.107916	0.107916
WNT5B	ENST00000310594.7	1.52459e-05	0.000411188	-2.74491	0.634647	5.30409	2.53586	0.580499	-0.236137	0.0236663	0.0236663
RASIP1	ENST00000222145.9	1.55088e-05	0.000417158	-1.20295	0.278375	3.96614	0.454649	0.0369083	-0.0112565	0.0793305	0.0793305
NLGN1	ENST00000457714.5	1.56543e-05	0.00042043	-1.05315	0.243825	4.29581	0.342915	0.0372916	-0.0245677	0.0518845	0.0518845
SIN3B	ENST00000596802.5	1.5663e-05	0.000420502	-0.893211	0.206802	5.31712	0.290668	0.00867488	0.0554759	0.0234569	0.0554759
SLC52A3	ENST00000488495.2	1.57838e-05	0.000423099	-0.958156	0.221926	4.50957	0.301426	0.0319184	0.000590006	0.0419584	0.0419584
PDSS1	ENST00000376215.10	1.60919e-05	0.000430044	-0.666692	0.154571	5.59948	0.162014	0.00512555	0.0307126	0.0193402	0.0307126
NHSL1	ENST00000343505.9	1.62417e-05	0.000433224	-0.865767	0.200821	6.4758	0.273261	0.00342195	0.0570717	0.0130955	0.0570717
TCOF1	ENST00000513346.5	1.66283e-05	0.000442697	-0.621628	0.144365	6.33404	0.134264	0.0174605	0.00546158	0.0138016	0.0138016
RARRES2	ENST00000223271.8	1.6647e-05	0.000443028	-0.682771	0.158574	6.21079	0.170028	0.00268791	0.0350308	0.0144544	0.0350308
RPF2	ENST00000441448.7	1.73471e-05	0.000460264	-0.773942	0.180131	6.99711	0.218632	0.00132721	0.0473434	0.0109485	0.0473434
BRD7	ENST00000562383.6	1.73693e-05	0.000460681	-0.865072	0.201354	4.50165	0.264015	0.0185537	0.0308347	0.0422615	0.0422615
UNK	ENST00000586527.1	1.81025e-05	0.00047832	-0.586571	0.136822	5.37882	0.111524	0.00560878	0.0047714	0.0224718	0.0224718
SLC38A1	ENST00000552197.5	1.81183e-05	0.000478557	-0.860051	0.200623	4.64055	0.264163	0.0228762	0.029944	0.0374982	0.0374982
USP36	ENST00000588086.5	1.82521e-05	0.000481551	-1.05385	0.245924	5.629	0.405435	0.0717212	0.0185981	0.0189967	0.0189967
ZNF37A	ENST00000361085.9	1.83068e-05	0.00048263	-0.596688	0.139263	6.24157	0.130084	0.00722246	0.021869	0.0142864	0.021869
PRKCG	ENST00000263431.4	1.8355e-05	0.000483719	-0.638566	0.149058	5.11313	0.147221	0.00648202	0.024632	0.0268453	0.0268453
GLDC	ENST00000639364.1	1.86213e-05	0.000489637	-0.648053	0.151386	7.23832	0.153493	0.00506942	0.029307	0.0102963	0.029307
LITAF	ENST00000622633.4	1.89445e-05	0.000497392	-0.60265	0.140905	6.79883	0.120551	0.0181411	-0.00364733	0.0116404	0.0116404
DTX3L	ENST00000296161.9	1.97978e-05	0.000517282	-0.74483	0.174549	5.60437	0.202992	0.00449127	0.0412099	0.0192822	0.0412099
TRIM4	ENST00000354241.5	1.99898e-05	0.000520944	-0.844285	0.197956	4.49601	0.252892	0.0163003	0.032509	0.0424797	0.0424797
LIG3	ENST00000593099.5	2.05121e-05	0.000532776	-0.745202	0.174961	4.84945	0.187994	0.0138889	0.0128561	0.0320282	0.0320282
PARP8	ENST00000505697.6	2.06145e-05	0.000534646	-1.00232	0.23539	5.26799	0.310378	0.0588634	-0.0476341	0.0242493	0.0242493
RBBP8	ENST00000399722.6	2.09419e-05	0.000541737	-0.833954	0.196012	5.9792	0.2338	0.0417503	-0.0103045	0.0158808	0.0158808
TAF1D	ENST00000393259.6	2.09729e-05	0.00054234	-0.629466	0.147961	5.52599	0.126841	0.0125701	-0.00260383	0.0202685	0.0202685
SSBP2	ENST00000507968.1	2.11874e-05	0.000547082	-0.678146	0.159489	5.04156	0.159168	0.0100264	0.0164776	0.0281286	0.0281286
U2AF1L5	ENST00000620065.4	2.13348e-05	0.000550482	-0.789765	0.185808	5.91882	0.228494	0.0354698	0.016249	0.016317	0.016317
CCDC169	ENST00000477250.1	2.14231e-05	0.000552357	-1.41746	0.333559	3.66247	0.619699	0.040826	-0.0196533	0.126066	0.126066
CRYBG1	ENST00000633556.1	2.14536e-05	0.00055294	-0.841724	0.19809	5.1137	0.232535	0.0320241	-0.00704241	0.0268354	0.0268354
NOP16	ENST00000614830.4	2.15286e-05	0.000554669	-0.757106	0.178209	6.34131	0.210073	0.00299322	0.0446444	0.0137645	0.0446444
SCG3	ENST00000220478.8	2.25132e-05	0.000577286	-0.67268	0.158711	7.38268	0.165977	0.00211214	0.0356718	0.00999677	0.0356718
FBLL1	ENST00000338333.4	2.2671e-05	0.000580275	-1.28769	0.303929	3.75831	0.535924	0.0297924	0.0183081	0.108767	0.108767
SLC7A1	ENST00000380752.10	2.26879e-05	0.000580495	-0.939761	0.221817	8.4379	0.323989	0.000216691	0.0735875	0.00962765	0.0735875
EMBP1	ENST00000648011.1	2.30637e-05	0.000588823	-0.643146	0.151938	5.11285	0.136	0.00777738	0.00710886	0.0268502	0.0268502
YBX3	ENST00000546164.5	2.30997e-05	0.00058953	-0.861019	0.203425	5.19631	0.242403	0.0366452	-0.011649	0.0254275	0.0254275
LRFN5	ENST00000298119.8	2.31239e-05	0.000589933	-1.01585	0.240019	4.93644	0.378715	0.00860964	0.0778037	0.0301633	0.0778037
TIMM50	ENST00000600878.1	2.3273e-05	0.000593305	-1.43639	0.339497	5.03613	0.757271	0.0308886	0.141998	0.0282289	0.141998
MMS22L	ENST00000369251.6	2.33289e-05	0.000594514	-0.629519	0.148809	5.65595	0.14395	0.0145196	0.0168071	0.0186964	0.0186964
PYCR2	ENST00000612039.4	2.34354e-05	0.000597013	-0.682724	0.161425	5.58635	0.163341	0.0195886	0.00979538	0.0194983	0.0194983
SLC9B2	ENST00000394785.8	2.40682e-05	0.000610918	-0.656314	0.155401	5.13474	0.145083	0.00975359	0.0100698	0.0264705	0.0264705
ATP1A3	ENST00000648268.1	2.43148e-05	0.000616493	-1.89113	0.448021	5.73454	1.10808	0.283197	-0.239238	0.0178881	0.0178881
MARCHF3	ENST00000308660.6	2.46554e-05	0.000624471	-1.14218	0.270791	3.96141	0.413481	0.0301067	-0.00247073	0.0798852	0.0798852
RNF43	ENST00000407977.6	2.47e-05	0.000625375	-2.24777	0.53296	4.13581	1.8566	0.205899	0.220171	0.0626475	0.220171
AC079880.1	ENST00000603040.1	2.51306e-05	0.000635133	-0.678724	0.161078	4.90386	0.155913	0.00807963	0.0140619	0.0308397	0.0308397
SP9	ENST00000394967.3	2.51712e-05	0.00063527	-3.7058	0.879556	1.69226	4.46873	0.105167	0.330893	1.05526	1.05526
NA	ENST00000620031.5	2.51661e-05	0.00063527	-0.752645	0.178635	7.444	0.208235	0.00296729	0.0448986	0.00988894	0.0448986
BAG1	ENST00000379707.7	2.64371e-05	0.000664092	-0.760277	0.180925	5.12465	0.196063	0.0224558	0.00586434	0.0266449	0.0266449
DNAJA3	ENST00000262375.11	2.64534e-05	0.000664148	-0.862725	0.205312	6.21042	0.273872	0.021361	0.0418682	0.0144564	0.0418682
UPP1	ENST00000395560.7	2.68403e-05	0.000672779	-0.834226	0.198685	5.03417	0.228174	0.0309482	-0.0067056	0.0282653	0.0282653
LEFTY1	ENST00000272134.5	2.71312e-05	0.000679102	-2.27794	0.542844	4.13995	1.91031	0.0490221	0.392997	0.0623137	0.392997
EIF3C	ENST00000569690.5	2.76769e-05	0.000691769	-0.885793	0.211316	5.16816	0.288974	0.0313917	0.0355903	0.0259001	0.0355903
SLC1A4	ENST00000234256.4	2.76766e-05	0.000691769	-1.68016	0.400822	5.37005	1.03967	0.0112228	0.229765	0.0226114	0.229765
NIPA1	ENST00000337435.9	2.86805e-05	0.00071508	-0.641167	0.153254	7.05449	0.151512	0.00162206	0.0336079	0.0107753	0.0336079
POLR3D	ENST00000518039.1	2.91069e-05	0.000724682	-0.847112	0.202642	4.98342	0.229839	0.032367	-0.0141673	0.0292285	0.0292285
TNFRSF10A	ENST00000221132.7	2.91357e-05	0.000724886	-1.19291	0.285377	5.12035	0.524637	0.00820074	0.113959	0.0267194	0.113959
CENPE	ENST00000265148.7	2.92103e-05	0.000726484	-0.974286	0.233109	6.6692	0.309959	0.0693327	-0.0378466	0.0121767	0.0121767
MTO1	ENST00000370305.5	2.9401e-05	0.000730195	-0.751188	0.179794	5.37853	0.204556	0.0260124	0.0180765	0.0224763	0.0224763
HSPA9	ENST00000524109.1	2.95073e-05	0.000732576	-0.585831	0.140244	6.04992	0.105088	0.014094	-0.0114332	0.0154084	0.0154084
EIF5A	ENST00000576930.5	2.99609e-05	0.000742524	-1.16738	0.279695	5.49496	0.502708	0.035357	0.0819868	0.0206946	0.0819868
ZNF876P	ENST00000356347.3	2.99986e-05	0.000743197	-0.682191	0.163459	5.42354	0.171678	0.00990437	0.0301737	0.0217607	0.0301737
NFXL1	ENST00000507131.5	3.03958e-05	0.000751185	-0.704013	0.168809	6.06199	0.153198	0.027413	-0.0217787	0.0153315	0.0153315
HAUS7	ENST00000370211.8	3.03801e-05	0.000751185	-0.694063	0.166418	5.17164	0.166357	0.0157013	0.0115989	0.0258413	0.0258413
SEMA3C	ENST00000427167.5	3.05271e-05	0.000753635	-3.73437	0.89564	1.94317	4.93912	0.333923	0.610407	0.869334	0.869334
TRIM49B	ENST00000332682.8	3.07271e-05	0.000757507	-4.09715	0.983	1.35543	5.31285	0.112426	0.233638	1.33701	1.33701
TRIM53BP	ENST00000532912.1	3.10346e-05	0.000764017	-3.81658	0.916183	1.57196	4.91757	0.107191	0.577418	1.1519	1.1519
TCF7	ENST00000395029.5	3.18014e-05	0.000780162	-0.946428	0.227498	5.56735	0.330824	0.0321507	0.045482	0.0197328	0.045482
ALDH1L2	ENST00000552270.1	3.1998e-05	0.000784058	-4.08109	0.981323	2.2618	6.07529	0.783273	0.565115	0.661219	0.661219
PGAM5	ENST00000454808.2	3.21812e-05	0.000787281	-0.798382	0.192036	5.5362	0.235478	0.0193323	0.0359846	0.020133	0.0359846
SDAD1	ENST00000395710.5	3.23133e-05	0.000790237	-1.19327	0.287084	5.93924	0.526069	0.0534433	0.0701826	0.0161657	0.0701826
IGSF21	ENST00000251296.4	3.23958e-05	0.000791704	-1.0212	0.245722	4.15854	0.336507	0.0297137	-0.000152214	0.0608552	0.0608552
UTP6	ENST00000583408.5	3.25336e-05	0.000794794	-0.593058	0.142735	6.37299	0.129963	0.00750416	0.0230556	0.0136043	0.0230556
NPAS2	ENST00000335681.10	3.31138e-05	0.000807285	-2.84969	0.68652	2.92189	2.93492	0.370983	0.252385	0.335982	0.335982
COA8	ENST00000409074.6	3.38094e-05	0.000821781	-0.616936	0.148797	5.222	0.126421	0.00820921	0.00708871	0.0250016	0.0250016
WDR60	ENST00000407559.8	3.41962e-05	0.000829359	-0.689603	0.166428	6.34128	0.175904	0.00222725	0.0393201	0.0137646	0.0393201
INPP5D	ENST00000445964.6	3.52902e-05	0.000851485	-1.80297	0.435887	4.25778	1.19821	0.230886	0.0478657	0.0541093	0.0541093
INPP5D	ENST00000630854.3	3.52902e-05	0.000851485	-1.80297	0.435887	4.25778	1.19821	0.230886	0.0478657	0.0541093	0.0541093
TGFA	ENST00000295400.11	3.55863e-05	0.00085728	-0.686593	0.166068	4.83329	0.172238	0.00897094	0.0295473	0.0323969	0.0323969
PPM1J	ENST00000464951.1	3.57216e-05	0.000859825	-1.42391	0.344476	3.77966	0.697883	0.0727531	0.0392855	0.105242	0.105242
CYCS	ENST00000409764.5	3.59142e-05	0.000863576	-0.693578	0.167843	7.32481	0.178121	0.00224418	0.0400127	0.010109	0.0400127
SUPT16H	ENST00000557652.1	3.61409e-05	0.000868433	-1.11689	0.270378	4.02078	0.39313	0.0363653	-0.0127472	0.0732912	0.0732912
WDR3	ENST00000369441.7	3.68915e-05	0.000883147	-0.766129	0.185677	5.18492	0.217457	0.0144247	0.0372893	0.0256179	0.0372893
RETSAT	ENST00000295802.9	3.69326e-05	0.000883829	-0.784558	0.190155	6.80365	0.22805	0.00172007	0.0525186	0.0116218	0.0525186
ACADM	ENST00000370841.8	3.70652e-05	0.000886098	-0.739916	0.179371	5.48602	0.191319	0.0274398	0.00640572	0.0208213	0.0208213
TBXT	ENST00000296946.6	3.75038e-05	0.000894757	-3.80335	0.922618	4.71205	5.36111	0.828232	0.448604	0.0354352	0.448604
WRAP73	ENST00000270708.12	3.78746e-05	0.000902684	-0.742688	0.180261	5.54286	0.204468	0.0116846	0.0370563	0.0200458	0.0370563
HAO2	ENST00000361035.8	3.79319e-05	0.000903745	-3.99685	0.970173	1.30528	4.82416	0.0300874	0.00956464	1.38177	1.38177
PDCD11	ENST00000493610.2	3.80449e-05	0.000905823	-1.38052	0.335154	3.7395	0.646793	0.0565239	0.0372833	0.111969	0.111969
PCSK1	ENST00000509190.1	3.83295e-05	0.000911672	-3.77191	0.916107	1.58755	4.57177	0.119768	0.259706	1.13911	1.13911
ZIC1	ENST00000282928.5	3.85058e-05	0.000915556	-2.50833	0.60937	2.72297	2.19374	0.136854	0.245923	0.420144	0.420144
BBS9	ENST00000434373.3	3.94471e-05	0.00093572	-1.59709	0.388521	6.23857	0.94635	0.00853934	0.217884	0.0143026	0.217884
LTO1	ENST00000279147.8	3.96592e-05	0.000940117	-0.853107	0.207596	5.36492	0.270053	0.0124202	0.052224	0.0226931	0.052224
LIN28B	ENST00000637759.1	4.00973e-05	0.000948264	-0.587083	0.14295	6.91772	0.127922	0.00397609	0.0266759	0.0112077	0.0266759
PPARGC1B	ENST00000394320.7	4.03286e-05	0.000952773	-1.09235	0.266065	3.98908	0.383533	0.0294716	0.00248114	0.0767142	0.0767142
GSTO1	ENST00000493946.1	4.04439e-05	0.000954532	-3.75268	0.914188	4.70587	4.27449	1.21801	-1.15587	0.0356047	0.0356047
FST	ENST00000491717.1	4.12239e-05	0.000972288	-2.09307	0.51044	3.46018	1.45102	0.220227	-0.0492939	0.170596	0.170596
TOX3	ENST00000219746.14	4.14822e-05	0.000977725	-1.35646	0.330919	4.31152	0.683403	0.0439159	0.120345	0.0510116	0.120345
JPH4	ENST00000622501.4	4.19891e-05	0.000988347	-0.913681	0.223053	5.0379	0.310147	0.0340091	0.0406198	0.0281963	0.0406198
FOSL1	ENST00000312562.6	4.24203e-05	0.000997495	-1.98269	0.484304	5.03518	1.46077	0.0321589	0.319667	0.0282467	0.319667
PLCXD2	ENST00000636933.1	4.25338e-05	0.000999495	-0.672242	0.164231	4.86477	0.141118	0.0087722	-0.00184021	0.0316856	0.0316856
HSD17B4	ENST00000522415.5	4.25776e-05	0.000999856	-0.907866	0.221808	5.74482	0.266726	0.0560089	-0.0316838	0.0177892	0.0177892
RBP7	ENST00000294435.8	4.27256e-05	0.00100266	-1.48432	0.362716	3.59346	0.799443	0.0573012	0.115805	0.140043	0.140043
HAS3	ENST00000569188.6	4.34022e-05	0.00101752	-1.48251	0.362597	6.34779	0.817119	0.00344842	0.193766	0.0137315	0.193766
WDR3	ENST00000471680.1	4.34341e-05	0.00101793	-0.67251	0.164492	5.06645	0.16742	0.0129119	0.0267615	0.0276745	0.0276745
WNK2	ENST00000411624.5	4.39687e-05	0.00102908	-0.929787	0.227578	5.8069	0.321501	0.0329216	0.0447662	0.0172224	0.0447662
GTF2H2C	ENST00000510979.5	4.40315e-05	0.00103021	-0.783209	0.191717	5.71553	0.228132	0.0354384	0.0196947	0.0180749	0.0196947
EMBP1	ENST00000622787.4	4.54904e-05	0.00105849	-1.35969	0.333449	3.65389	0.582128	0.0390471	-0.00467174	0.127735	0.127735
BEND4	ENST00000502486.6	4.57846e-05	0.0010645	-0.666673	0.163554	6.67849	0.165436	0.0224468	0.017678	0.0121359	0.017678
TIMM21	ENST00000169551.11	4.58899e-05	0.00106659	-0.662299	0.162502	5.16563	0.151287	0.0136676	0.0109515	0.0259428	0.0259428
PRSS16	ENST00000421826.6	4.6318e-05	0.00107547	-1.0759	0.264125	4.65699	0.365904	0.0676394	-0.0443471	0.0370033	0.0370033
RGS10	ENST00000369103.3	4.65779e-05	0.00108008	-0.847581	0.20814	4.87312	0.229023	0.0334819	-0.0166005	0.0315016	0.0315016
PITPNC1	ENST00000578527.1	4.82416e-05	0.00111352	-0.607067	0.149377	5.614	0.137335	0.00577149	0.0276989	0.0191693	0.0276989
GLB1L3	ENST00000431683.7	4.84329e-05	0.0011172	-1.50106	0.369441	4.09646	0.748044	0.138744	-0.048637	0.0659864	0.0659864
ITGA6	ENST00000409080.6	4.87004e-05	0.001123	-0.591602	0.145651	7.6027	0.130455	0.0180502	0.0137711	0.00966148	0.0137711
NA	ENST00000644085.1	4.98391e-05	0.00114625	-1.566	0.386059	3.37726	0.745958	0.031733	-0.0189205	0.191829	0.191829
NA	ENST00000645949.1	4.98391e-05	0.00114625	-1.566	0.386059	3.37726	0.745958	0.031733	-0.0189205	0.191829	0.191829
PLD5	ENST00000366545.5	4.99866e-05	0.00114927	-2.26407	0.558246	4.00034	1.7328	0.391985	-0.148245	0.0754729	0.0754729
PPP1R14C	ENST00000361131.5	5.01308e-05	0.00115183	-1.9416	0.478813	3.08868	1.40483	0.0676336	0.274729	0.27626	0.27626
NKX6-1	ENST00000295886.4	5.18246e-05	0.00118907	-3.75963	0.928936	1.66433	4.69692	0.217108	0.353498	1.07727	1.07727
FAM76B	ENST00000540054.5	5.19658e-05	0.00119165	-0.90325	0.223212	4.27715	0.273512	0.0217797	0.0141629	0.0529555	0.0529555
MBNL3	ENST00000394311.6	5.30027e-05	0.00121424	-1.37941	0.341272	4.26266	0.710594	0.112506	0.0621942	0.0538141	0.0621942
SCN9A	ENST00000454569.6	5.30779e-05	0.00121557	-3.55607	0.879857	2.13263	4.13811	0.419828	0.0106938	0.741395	0.741395
SLC25A12	ENST00000422440.7	5.34808e-05	0.0012232	-0.650371	0.160988	5.23504	0.153096	0.0140888	0.0186622	0.024787	0.024787
HERC3	ENST00000402738.6	5.38407e-05	0.00122824	-1.92148	0.475815	6.1129	1.20325	0.324583	-0.20506	0.0150175	0.0150175
KITLG	ENST00000646633.1	5.44074e-05	0.00123996	-1.77118	0.438863	4.5881	1.02096	0.249734	-0.149943	0.0391679	0.0391679
NQO2	ENST00000380454.8	5.43921e-05	0.00123996	-0.835599	0.207041	5.24636	0.260907	0.0220515	0.0422476	0.0246016	0.0422476
ADAMTS19	ENST00000509467.1	5.548e-05	0.00126276	-1.42883	0.354437	4.22259	0.732106	0.132118	0.0174337	0.0563209	0.0563209
ALG13	ENST00000394780.7	5.56071e-05	0.00126525	-0.683829	0.169655	6.30795	0.156172	0.0292382	-0.00938125	0.0139358	0.0139358
DAP3	ENST00000421487.6	5.56335e-05	0.00126544	-0.730092	0.181137	5.89102	0.199283	0.0319484	0.0172677	0.0165293	0.0172677
POLR1D	ENST00000302979.4	5.66271e-05	0.00128405	-0.754998	0.18751	4.91646	0.205403	0.0221647	0.0208308	0.0305753	0.0305753
SLC37A1	ENST00000398341.7	5.7164e-05	0.00129355	-0.658935	0.163742	5.98133	0.162432	0.00538813	0.0348291	0.015866	0.0348291
ANG	ENST00000397990.4	5.75083e-05	0.00129967	-2.05814	0.511618	3.80139	1.48563	0.290853	-0.0222982	0.101777	0.101777
BNIP1	ENST00000351486.9	5.7768e-05	0.00130428	-0.653231	0.162425	4.93825	0.142512	0.00944616	0.00867736	0.0301265	0.0301265
SLC1A6	ENST00000598504.5	5.80119e-05	0.00130853	-0.911716	0.226752	4.40305	0.272825	0.0307089	-0.00138736	0.0464161	0.0464161
TLCD3B	ENST00000380495.8	5.80505e-05	0.00130856	-0.63384	0.157648	5.37794	0.150349	0.0139151	0.0233643	0.0224858	0.0233643
H1-4	ENST00000304218.5	5.80505e-05	0.00130856	-0.760699	0.189201	4.48075	0.187162	0.0106137	0.00634042	0.0430816	0.0430816
KCNE4	ENST00000488477.2	5.82709e-05	0.0013131	-0.837543	0.208359	4.35659	0.2419	0.0164704	0.0228502	0.04865	0.04865
N4BP2L2	ENST00000503296.6	5.87082e-05	0.00132126	-4.93274	1.22768	1.77322	7.44066	1.26781	-1.09144	0.992979	0.992979
STAG3	ENST00000317296.9	5.91375e-05	0.00132965	-4.5927	1.14354	1.6032	6.48289	0.835161	-0.641376	1.12635	1.12635
RTN4IP1	ENST00000369063.7	5.9207e-05	0.00133079	-0.760539	0.18938	5.98726	0.216563	0.00261468	0.0511822	0.015825	0.0511822
UNC5D	ENST00000287272.6	5.96986e-05	0.00134012	-0.694685	0.173066	6.44566	0.162785	0.0316843	-0.00917391	0.0132433	0.0132433
RPF2	ENST00000368864.8	5.97297e-05	0.00134039	-0.90179	0.224668	5.66827	0.304538	0.0101534	0.0655603	0.0185633	0.0655603
RNASET2	ENST00000476238.6	5.98789e-05	0.00134331	-0.643695	0.160391	5.24944	0.12705	0.0140367	-0.0106032	0.0245513	0.0245513
NA	ENST00000302102.9	6.13407e-05	0.00137172	-5.69356	1.42069	2.15364	9.85476	2.29962	-2.13743	0.727938	0.727938
CXCL12	ENST00000343575.10	6.1933e-05	0.00138277	-1.15383	0.288075	6.06652	0.498985	0.00375753	0.120724	0.0153029	0.120724
DST	ENST00000651289.1	6.20506e-05	0.00138386	-0.663255	0.165612	5.53489	0.158376	0.0209907	0.0120139	0.0201503	0.0201503
GRB2	ENST00000392564.5	6.24196e-05	0.00139098	-0.681897	0.170326	7.41459	0.174308	0.024972	0.0185447	0.00993925	0.0185447
TAP1	ENST00000643923.1	6.24991e-05	0.00139231	-1.09332	0.273113	4.83361	0.448112	0.0396694	0.0722167	0.0323894	0.0722167
RNF7	ENST00000477012.5	6.25515e-05	0.00139304	-0.996489	0.248937	4.6238	0.353543	0.0549385	0.0146185	0.0380162	0.0380162
ENOPH1	ENST00000273920.8	6.3516e-05	0.00141273	-0.67773	0.16946	6.86671	0.172256	0.00537006	0.037705	0.0113867	0.037705
SLC25A21	ENST00000331299.5	6.3659e-05	0.00141457	-0.723086	0.180825	4.7486	0.170572	0.0145826	0.00256302	0.0344638	0.0344638
TIMM9	ENST00000395159.7	6.38572e-05	0.00141852	-0.629861	0.157541	5.72322	0.147644	0.0192299	0.016553	0.0179987	0.0179987
EPB41	ENST00000460378.1	6.41407e-05	0.00142392	-0.923106	0.230948	4.78363	0.316793	0.0464257	0.0300189	0.0335796	0.0335796
FERMT1	ENST00000536936.1	6.51129e-05	0.00144095	-2.01452	0.504453	4.48313	1.36209	0.338722	-0.157967	0.0429868	0.0429868
MRM1	ENST00000614766.5	6.52507e-05	0.00144355	-4.70728	1.17889	2.8345	8.31528	1.33161	0.75307	0.371263	0.75307
HES3	ENST00000377898.3	6.55081e-05	0.00144742	-3.28657	0.823282	3.61828	4.05382	0.0709198	0.945771	0.134871	0.945771
HOMER2	ENST00000558090.2	6.57996e-05	0.00145328	-0.717208	0.179707	5.12221	0.19307	0.00734677	0.0410952	0.0266872	0.0410952
C5orf63	ENST00000535381.5	6.58147e-05	0.00145328	-0.730201	0.182965	5.33248	0.20013	0.00521774	0.0449967	0.0232109	0.0449967
NIN	ENST00000530997.6	6.67675e-05	0.00147247	-1.26602	0.317496	5.92455	0.601808	0.069712	0.0814936	0.0162741	0.0814936
C1QL3	ENST00000298943.4	6.84134e-05	0.00150076	-1.34558	0.337937	3.62734	0.606751	0.0382794	0.0411931	0.133023	0.133023
GTDC1	ENST00000409298.5	7.13627e-05	0.00156036	-4.28129	1.07795	1.4475	5.56805	0.486298	-0.399782	1.25667	1.25667
YEATS2	ENST00000432781.1	7.13745e-05	0.00156036	-0.809452	0.203807	4.54929	0.211189	0.0218059	-0.00352487	0.0405002	0.0405002
FAM221A	ENST00000344962.9	7.15967e-05	0.00156424	-1.08358	0.27288	4.41447	0.358756	0.0657992	-0.0576603	0.0458957	0.0458957
SLC6A7	ENST00000230671.7	7.2876e-05	0.00158972	-3.90353	0.984075	1.25862	4.57178	0.0285694	-0.0279108	1.42404	1.42404
GBE1	ENST00000429644.7	7.43628e-05	0.00161664	-0.755769	0.19076	5.54447	0.2149	0.0345595	0.019871	0.0200248	0.0200248
TEX14	ENST00000349033.9	7.56499e-05	0.00163984	-2.24836	0.568086	2.85082	1.65746	0.119613	0.0565419	0.36447	0.36447
POLR1B	ENST00000417433.6	7.57228e-05	0.00164062	-0.956349	0.241652	6.65112	0.344456	0.0154356	0.0721578	0.0122571	0.0721578
IPCEF1	ENST00000265198.8	7.66244e-05	0.00165713	-1.26782	0.320585	3.8078	0.543653	0.0533847	0.0234135	0.100778	0.100778
TMSB4Y	ENST00000284856.4	7.72734e-05	0.00166958	-0.965845	0.244351	4.06676	0.298388	0.0208498	0.00231445	0.0687109	0.0687109
RBP1	ENST00000474490.1	7.74131e-05	0.00167209	-4.54862	1.15089	2.74089	7.79644	1.08784	0.898979	0.412011	0.898979
SH2B3	ENST00000341259.6	7.77661e-05	0.00167868	-0.671962	0.170066	7.04582	0.170167	0.000973734	0.04241	0.0108007	0.04241
AK5	ENST00000354567.7	7.81513e-05	0.00168596	-1.29939	0.328959	3.78452	0.612794	0.0578651	0.0749724	0.104456	0.104456
GATD3B	ENST00000620528.4	7.83866e-05	0.00168948	-0.755518	0.191305	5.93764	0.214203	0.0387191	0.0149821	0.0161775	0.0161775
NKAPL	ENST00000343684.3	7.87258e-05	0.00169575	-1.0976	0.277998	3.86046	0.413069	0.0229588	0.041602	0.0929653	0.0929653
AMN1	ENST00000281471.11	8.0641e-05	0.00173329	-0.912753	0.231517	4.67706	0.314256	0.0244836	0.0559167	0.0364163	0.0559167
GCLM	ENST00000615724.1	8.25218e-05	0.00176885	-0.800285	0.203275	4.92838	0.210157	0.0316527	-0.00912719	0.0303284	0.0303284
WNT10B	ENST00000301061.9	8.27261e-05	0.0017716	-3.86802	0.982639	3.01863	5.64717	0.325267	1.1231	0.300118	1.1231
C15orf61	ENST00000342683.6	8.64149e-05	0.0018461	-0.872799	0.22232	4.20842	0.237935	0.0168788	-0.00512702	0.0572602	0.0572602
METTL8	ENST00000438609.5	8.69567e-05	0.00185508	-1.21887	0.31059	4.46706	0.559631	0.101064	0.0413584	0.0436356	0.0436356
NAP1L1	ENST00000547529.6	8.71315e-05	0.00185802	-3.60264	0.918131	2.00458	4.90527	0.423588	0.84086	0.826633	0.84086
RPL8	ENST00000528957.5	8.79436e-05	0.0018725	-0.740348	0.188785	6.11489	0.207202	0.0295114	0.023948	0.0150055	0.023948
ZSCAN10	ENST00000576985.6	8.99991e-05	0.00190817	-0.763616	0.194995	6.74262	0.22056	0.00402864	0.0530058	0.0118644	0.0530058
ARL4A	ENST00000396662.5	9.07424e-05	0.00192219	-1.3332	0.340614	4.66859	0.598013	0.137365	-0.0563812	0.0366617	0.0366617
PRR15	ENST00000450427.1	9.20822e-05	0.00194764	-2.22093	0.567931	2.78574	1.50625	0.0917046	-0.0585905	0.392113	0.392113
SELENOS	ENST00000398226.7	9.22482e-05	0.00195056	-1.35846	0.34742	3.72599	0.687206	0.0667244	0.100256	0.114327	0.114327
GTF2H3	ENST00000228955.11	9.25015e-05	0.00195533	-0.627633	0.160542	5.59585	0.149106	0.016893	0.0217676	0.0193837	0.0217676
SLC7A11	ENST00000280612.9	9.26055e-05	0.00195694	-1.90865	0.488247	8.07253	1.37895	0.00050785	0.35707	0.00940416	0.35707
TAF12	ENST00000263974.4	9.32015e-05	0.00196776	-0.904657	0.23151	4.96259	0.301908	0.0507577	0.0197261	0.0296375	0.0296375
RRP15	ENST00000491428.1	9.35434e-05	0.0019729	-0.803288	0.205615	4.46756	0.218717	0.019801	0.0116185	0.0436153	0.0436153
DUX4	ENST00000565211.1	9.59057e-05	0.00201517	-3.00522	0.770426	2.19072	3.31985	0.185754	0.577306	0.70458	0.70458
PCDH18	ENST00000412923.6	9.59735e-05	0.00201539	-1.06147	0.272132	7.34777	0.426881	0.00246822	0.108616	0.0100633	0.108616
NOS1AP	ENST00000430120.3	9.62439e-05	0.00201925	-1.29803	0.33284	4.22477	0.638406	0.0481538	0.11802	0.0561794	0.11802
KANK1	ENST00000382303.5	9.69397e-05	0.00203143	-0.707948	0.181612	5.82447	0.177438	0.0324036	0.00144755	0.017071	0.017071
PLCB4	ENST00000414679.6	9.70547e-05	0.00203263	-0.798868	0.204951	4.84299	0.22123	0.0308331	0.00638314	0.0321746	0.0321746
ZSCAN10	ENST00000576483.1	9.71122e-05	0.00203322	-0.967354	0.248186	4.17078	0.320994	0.0324638	0.0178633	0.0599307	0.0599307
THBS2	ENST00000488355.1	9.73513e-05	0.00203641	-3.34118	0.857351	2.63409	4.23111	0.270754	0.831821	0.462008	0.831821
CDCA7L	ENST00000447180.5	9.74531e-05	0.00203733	-0.920811	0.236296	4.27356	0.317426	0.0305882	0.0482347	0.0531658	0.0531658
HEY2	ENST00000368364.4	9.79381e-05	0.00204564	-0.693474	0.178013	5.20614	0.168635	0.0222689	0.0081845	0.0252638	0.0252638
TMEM62	ENST00000260403.7	0.00010135	0.00211125	-0.766351	0.19714	4.86647	0.216281	0.0266485	0.0234674	0.0316479	0.0316479
PSPH	ENST00000275605.8	0.000102036	0.00212241	-0.897032	0.230855	6.35501	0.305353	0.0240843	0.0558566	0.0136949	0.0558566
MYCL	ENST00000372816.3	0.000102628	0.00213219	-0.831434	0.21405	5.5677	0.257112	0.0489977	0.0131614	0.0197285	0.0197285
TSEN15	ENST00000645668.1	0.0001031	0.00214073	-0.762359	0.196323	6.55252	0.220609	0.00976323	0.048051	0.012721	0.048051
NIPA2	ENST00000398014.6	0.000103619	0.00214997	-0.872237	0.22469	5.36405	0.270314	0.0530214	-0.000427874	0.0227069	0.0227069
RPL26	ENST00000582556.5	0.000103866	0.0021541	-0.762166	0.196365	4.9844	0.212551	0.0286293	0.0192226	0.0292094	0.0292094
MPP1	ENST00000369534.8	0.00010391	0.00215436	-1.60273	0.412938	6.51979	0.975242	0.00509053	0.250686	0.0128806	0.250686
RPS24	ENST00000440692.6	0.00010571	0.00218781	-0.934365	0.240996	4.25374	0.331606	0.0177423	0.0693763	0.0543552	0.0693763
BCAN	ENST00000329117.10	0.000107652	0.00222343	-2.06366	0.532879	3.29169	1.34265	0.210645	-0.129351	0.215296	0.215296
C10orf95	ENST00000625129.1	0.00010819	0.00223191	-0.800543	0.206781	4.33661	0.221454	0.0144656	0.0220256	0.049672	0.049672
SAP18	ENST00000621421.4	0.000110006	0.00226739	-1.06757	0.276045	6.30618	0.433355	0.0812196	0.0330817	0.013945	0.0330817
FTLP14	ENST00000562087.2	0.000111371	0.00229282	-1.068	0.276371	3.88563	0.343928	0.0250965	-0.0229228	0.0894749	0.0894749
RREB1	ENST00000475946.5	0.000113196	0.00232155	-0.831134	0.215297	4.26744	0.217969	0.0160009	-0.00258406	0.0535281	0.0535281
FGF11	ENST00000575082.5	0.000114061	0.00233317	-1.0433	0.270386	4.87633	0.414271	0.0219589	0.0877037	0.0314313	0.0877037
FGF11	ENST00000638377.1	0.000114061	0.00233317	-1.0433	0.270386	4.87633	0.414271	0.0219589	0.0877037	0.0314313	0.0877037
LIF	ENST00000249075.4	0.00011438	0.00233902	-1.14547	0.296919	4.25198	0.499427	0.0162621	0.115979	0.0544632	0.115979
DGUOK	ENST00000629438.2	0.000116291	0.00237258	-0.615144	0.159619	5.89679	0.131088	0.021733	0.000225961	0.0164846	0.0164846
LAS1L	ENST00000374811.7	0.000116774	0.00238036	-0.680105	0.176522	6.88019	0.176155	0.00969119	0.0370489	0.0113384	0.0370489
CLPB	ENST00000538039.5	0.000117513	0.00239265	-0.636664	0.165313	5.3207	0.135582	0.0175932	-0.000119135	0.0233996	0.0233996
TOX	ENST00000361421.2	0.000118224	0.00240503	-1.01751	0.264302	5.20944	0.394422	0.00601817	0.0987653	0.0252091	0.0987653
BCL2L1	ENST00000422920.1	0.000118458	0.0024091	-0.88843	0.230803	5.50623	0.300716	0.00895175	0.0709535	0.0205374	0.0709535
MAP2K5	ENST00000178640.10	0.000119825	0.00243548	-0.611978	0.159101	6.38425	0.142731	0.00356067	0.0344088	0.0135478	0.0344088
ARRB2	ENST00000269260.7	0.000119875	0.00243579	-0.591468	0.153772	6.72702	0.133325	0.018932	0.0165369	0.0119289	0.0165369
DPPA4	ENST00000495679.5	0.000120298	0.00244368	-1.21553	0.316089	5.82476	0.563147	0.0209895	0.128879	0.0170685	0.128879
DONSON	ENST00000437395.5	0.000120357	0.00244417	-0.62466	0.162444	5.79369	0.142589	0.0222431	0.0096683	0.0173388	0.0173388
ZIC5	ENST00000267294.4	0.000121089	0.00245589	-0.775192	0.201668	6.78944	0.229081	0.00119199	0.0598127	0.0116769	0.0598127
SBDSP1	ENST00000453858.1	0.000121368	0.00245972	-0.641744	0.166975	5.12167	0.157008	0.00761494	0.0342062	0.0266965	0.0342062
NLRP3P1	ENST00000622303.1	0.000122109	0.00247332	-1.62905	0.424028	3.30556	0.856874	0.0583051	0.0176065	0.211395	0.211395
ERVMER34-1	ENST00000443173.6	0.000124007	0.00250672	-0.911375	0.237457	4.49119	0.253163	0.0419103	-0.036933	0.0426683	0.0426683
ESRP1	ENST00000433389.8	0.000124149	0.00250885	-1.34533	0.350548	7.40139	0.659834	0.174363	-0.0282861	0.00996267	0.00996267
GPAT3	ENST00000395226.6	0.000125777	0.00253447	-1.73269	0.451858	3.17119	0.913243	0.0558639	-0.0401363	0.250399	0.250399
SYT14	ENST00000637265.1	0.000127603	0.00256905	-0.883603	0.230643	5.06404	0.282442	0.0520764	0.00819409	0.0277179	0.0277179
H2AC8	ENST00000303910.4	0.000133518	0.00267436	-0.753868	0.197354	4.44156	0.208222	0.013718	0.0334411	0.0447049	0.0447049
HDAC9	ENST00000406451.8	0.000133611	0.00267546	-1.03973	0.272201	4.45507	0.413223	0.0259617	0.0851786	0.0441322	0.0851786
GRTP1	ENST00000375431.8	0.000134685	0.00269465	-0.749979	0.196446	4.98585	0.21505	0.0152063	0.0426804	0.0291813	0.0426804
TRIM51	ENST00000449290.6	0.000135437	0.00270816	-3.95165	1.03545	1.28268	5.01863	0.206074	0.211388	1.40216	1.40216
ABLIM1	ENST00000392955.7	0.000135698	0.0027126	-0.642192	0.168295	6.24606	0.15489	0.0282225	0.0107358	0.0142622	0.0142622
NFE2	ENST00000435572.7	0.000135979	0.00271746	-1.00053	0.262236	4.34147	0.369256	0.0537319	0.0324416	0.0494199	0.0494199
CLCC1	ENST00000369970.7	0.000137471	0.0027418	-0.701809	0.184073	5.57403	0.18842	0.0179098	0.0329142	0.0196496	0.0329142
NLE1	ENST00000360831.9	0.000138829	0.00276733	-0.678284	0.178016	5.3203	0.176048	0.0238891	0.0236453	0.0234059	0.0236453
TRAK1	ENST00000341421.7	0.000139487	0.00277809	-0.661055	0.173547	4.90165	0.14737	0.0142916	0.00604828	0.0308865	0.0308865
DHRS11	ENST00000618403.5	0.000140955	0.00280023	-0.931089	0.244606	5.72832	0.331876	0.0430319	0.0467161	0.0179486	0.0467161
GABRB2	ENST00000393959.5	0.000141702	0.00281104	-5.72058	1.50337	2.45423	10.2052	2.83669	-2.35213	0.55348	0.55348
TRPM3	ENST00000377111.6	0.000141701	0.00281104	-1.87239	0.492063	4.2926	1.3423	0.233223	0.129966	0.0520655	0.129966
DDB2	ENST00000256996.8	0.000142212	0.00281957	-1.44349	0.379438	6.28758	0.797868	0.00722488	0.208735	0.0140418	0.208735
BCAT1	ENST00000612790.1	0.000144139	0.00285135	-0.817795	0.215155	5.25719	0.232984	0.0450127	-0.00457771	0.0244249	0.0244249
EIF1	ENST00000462917.1	0.000144353	0.00285476	-0.599907	0.157846	5.25948	0.115577	0.0129853	-0.00347146	0.0243876	0.0243876
CKMT1B	ENST00000441322.5	0.000144604	0.00285892	-1.34196	0.353132	5.965	0.557636	0.171073	-0.149349	0.0159804	0.0159804
FAM90A28P	ENST00000596881.1	0.000145544	0.0028759	-3.79975	1.00031	1.20673	4.38322	0.0291898	0.0355587	1.47175	1.47175
ESRRAP2	ENST00000631002.1	0.000145927	0.00288185	-2.80043	0.737363	2.3376	2.52436	0.198446	0.0161	0.617111	0.617111
BRAF	ENST00000288602.11	0.0001466	0.0028927	-4.97872	1.31131	1.79622	7.82253	1.60359	-1.12081	0.975709	0.975709
LRRC17	ENST00000339431.9	0.000147662	0.0029112	-3.49799	0.921745	1.96145	4.69033	0.368461	0.90596	0.856505	0.90596
MAL2	ENST00000614891.5	0.000148464	0.00292399	-0.822336	0.216768	7.53547	0.259257	0.000711914	0.0697706	0.00974889	0.0697706
NAA10	ENST00000460996.5	0.000148914	0.00293013	-0.68174	0.179742	5.29888	0.153783	0.0247109	-0.00677112	0.02375	0.02375
UQCRH	ENST00000496387.5	0.000149371	0.00293649	-1.0418	0.274729	5.61302	0.416177	0.00748891	0.105725	0.0191807	0.105725
ITPRIP	ENST00000337478.3	0.000149597	0.00293945	-0.715026	0.188575	4.80358	0.170193	0.0202457	0.000772565	0.033095	0.033095
TRIM43CP	ENST00000422468.1	0.000150173	0.00294756	-3.80518	1.0038	1.20944	4.48421	0.0421769	0.133324	1.46924	1.46924
RDH11	ENST00000553384.5	0.000150935	0.00295796	-0.739068	0.195029	5.93587	0.182971	0.0408642	-0.0169842	0.0161904	0.0161904
MYBBP1A	ENST00000254718.8	0.000151144	0.00295991	-0.664947	0.175486	6.84342	0.169601	0.02765	0.0185428	0.0114717	0.0185428
CEBPZOS	ENST00000392061.6	0.000151461	0.00296524	-0.972596	0.256712	4.81088	0.362865	0.0223364	0.0765155	0.0329209	0.0765155
UTP20	ENST00000261637.5	0.000152557	0.00298426	-0.677743	0.178972	8.05143	0.176238	0.000303958	0.0477424	0.00940267	0.0477424
NIBAN1	ENST00000367511.4	0.000153684	0.00300131	-1.42006	0.375177	6.53825	0.773882	0.00277116	0.208366	0.0127906	0.208366
TAC1	ENST00000346867.4	0.000154182	0.00301019	-4.17623	1.10359	1.39497	5.38133	0.524628	-0.338284	1.30222	1.30222
PHF7	ENST00000327906.8	0.000154515	0.00301502	-0.839026	0.221748	4.59382	0.261661	0.0347793	0.0283098	0.0389786	0.0389786
FXYD5	ENST00000342879.7	0.000156006	0.00304074	-1.18204	0.312601	3.84237	0.441878	0.0510087	-0.0226194	0.0955707	0.0955707
ESRP1	ENST00000517610.1	0.000156474	0.003049	-1.16168	0.307276	6.10148	0.518151	0.0480766	0.0935515	0.0150865	0.0935515
USP36	ENST00000592231.5	0.000157621	0.00306905	-1.29659	0.343127	4.89486	0.645626	0.103657	0.0729471	0.0310311	0.0729471
ZFP64	ENST00000361387.6	0.000157634	0.00306905	-0.930129	0.246149	4.88804	0.27255	0.0597068	-0.0434467	0.0311773	0.0311773
SMARCA2	ENST00000382194.6	0.000159473	0.00310229	-5.16878	1.36891	4.66803	10.2636	1.40823	1.40264	0.0366783	1.40264
TRIM49B	ENST00000622138.4	0.000159653	0.00310492	-3.88836	1.02988	1.25103	4.96415	0.16001	0.375429	1.43096	1.43096
SLC9A7	ENST00000328306.4	0.000160301	0.00311314	-3.6972	0.979509	1.99984	4.9741	0.609268	0.482375	0.829889	0.829889
CD3EAP	ENST00000309424.7	0.000161153	0.00312804	-0.600972	0.159273	6.26835	0.138791	0.00448278	0.033569	0.0141432	0.033569
UNC93A	ENST00000504706.1	0.000163889	0.00317414	-3.73204	0.99019	1.318	4.21878	0.100367	-0.0499498	1.37035	1.37035
NSUN2	ENST00000506139.5	0.000166003	0.00320978	-0.930143	0.246996	5.78882	0.278556	0.0741284	-0.0503704	0.0173823	0.0173823
CHRDL1	ENST00000444321.2	0.000167841	0.00323921	-4.43327	1.1781	1.52349	5.90631	0.889725	-0.877036	1.19215	1.19215
DSC3	ENST00000434452.5	0.000169555	0.00326586	-0.813799	0.216405	4.579	0.219988	0.0307746	-0.00414094	0.0394724	0.0394724
ABHD12B	ENST00000337334.7	0.000169801	0.0032667	-3.68135	0.97904	2.03345	5.21593	0.455718	0.982061	0.806947	0.982061
ETV1	ENST00000405358.8	0.000171232	0.00328916	-1.37637	0.366245	6.02255	0.593292	0.185616	-0.1544	0.0155867	0.0155867
PHLDA1	ENST00000266671.9	0.000171374	0.00329098	-0.937574	0.249497	4.71968	0.338412	0.0342187	0.0591544	0.0352283	0.0591544
HADH	ENST00000640060.1	0.000173126	0.00332101	-4.20373	1.11941	2.36945	6.46027	1.28037	0.168201	0.599244	0.599244
ADRA1D	ENST00000379453.5	0.000173342	0.00332424	-3.20076	0.8524	1.75763	3.94536	0.0518622	1.03802	1.00479	1.03802
HPS1	ENST00000465957.1	0.000174978	0.00335104	-0.657061	0.175093	4.70236	0.134946	0.0102844	-0.00350021	0.0357018	0.0357018
PLD5	ENST00000536534.6	0.000175896	0.00336588	-1.57371	0.419507	3.35206	0.803459	0.0653914	0.0102224	0.198587	0.198587
CTC1	ENST00000581671.2	0.00017597	0.00336636	-4.74111	1.26388	1.67741	6.7463	1.32917	-1.3256	1.06693	1.06693
HOXA1	ENST00000643460.1	0.000181749	0.00346092	-4.02294	1.07475	2.3904	6.24132	0.0647886	1.66786	0.587718	1.66786
CLU	ENST00000522098.1	0.000183379	0.0034844	-0.637739	0.170479	5.73324	0.156889	0.0115001	0.0320943	0.0179007	0.0320943
PROSER1	ENST00000352251.8	0.000185139	0.00351404	-0.591573	0.158239	8.11224	0.135035	0.000969771	0.0365897	0.00941031	0.0365897
ARPC4	ENST00000440787.5	0.000185341	0.00351693	-1.20222	0.321605	4.01509	0.524084	0.0812548	0.0318464	0.0738897	0.0738897
FRAS1	ENST00000512123.4	0.000185586	0.00351967	-0.823183	0.220228	8.51345	0.26149	0.000213072	0.0725374	0.00972192	0.0725374
PSMG4	ENST00000419065.6	0.000186381	0.00353189	-0.923135	0.247039	4.25968	0.262905	0.0375482	-0.0284837	0.0539943	0.0539943
PINK1	ENST00000321556.5	0.000186663	0.00353629	-0.644528	0.172499	6.58597	0.160332	0.00376156	0.0408724	0.0125589	0.0408724
IDH1	ENST00000415913.5	0.000188367	0.00356376	-1.97976	0.530181	5.49927	1.27594	0.401003	-0.275871	0.0206342	0.0206342
SKOR1	ENST00000554054.5	0.000189984	0.00359146	-4.60923	1.23507	2.81881	8.20398	0.51925	1.76883	0.377882	1.76883
PRUNE2	ENST00000443509.6	0.000191929	0.00362141	-2.12308	0.569281	5.87691	1.4808	0.469481	-0.308779	0.0166401	0.0166401
NOC3L	ENST00000371361.3	0.000194024	0.00365407	-0.65571	0.17595	7.07958	0.166137	0.000967915	0.0454699	0.0107032	0.0454699
SERPINI1	ENST00000446050.6	0.000194809	0.00366786	-1.09134	0.292924	4.85658	0.379573	0.0968392	-0.0690031	0.0318679	0.0318679
MDGA2	ENST00000399232.8	0.000195152	0.00367236	-0.712082	0.191152	4.69973	0.174457	0.0190339	0.00888922	0.0357748	0.0357748
RNF144B	ENST00000259939.3	0.000196888	0.00370304	-0.693934	0.186392	5.18756	0.186154	0.00553279	0.0465803	0.0255737	0.0465803
LDHA	ENST00000545215.5	0.000197552	0.00371454	-1.05174	0.282565	6.15185	0.381792	0.104977	-0.0425475	0.0147876	0.0147876
METTL8	ENST00000463392.5	0.00019839	0.00372831	-4.73762	1.27319	1.68598	6.78188	1.37134	-1.31091	1.06019	1.06019
TPRX1	ENST00000322175.7	0.000198862	0.00373418	-3.62737	0.97498	1.47736	4.14264	0.19477	0.0493462	1.23111	1.23111
G0S2	ENST00000367029.5	0.000200874	0.00376692	-3.02506	0.813645	2.95067	3.53972	0.178553	0.814473	0.324962	0.814473
H2BC7	ENST00000356530.5	0.000203099	0.0038017	-1.0424	0.280582	3.85414	0.359315	0.0242229	0.0174479	0.0938664	0.0938664
PARP12	ENST00000473341.5	0.000203392	0.00380602	-1.65848	0.446456	4.15482	0.906178	0.237843	-0.136576	0.0611414	0.0611414
RNF220	ENST00000355387.6	0.000203947	0.00381336	-1.54314	0.415483	5.18294	0.814833	0.233289	-0.107724	0.0256511	0.0256511
BCL2L12	ENST00000246785.7	0.000204252	0.00381704	-0.678949	0.182823	5.44646	0.160716	0.0287315	-0.000700661	0.0214049	0.0214049
NXPH4	ENST00000349394.6	0.000205153	0.00383081	-1.5446	0.416045	3.36594	0.843714	0.0647926	0.0951774	0.194847	0.194847
PRKG1	ENST00000373975.3	0.000207984	0.0038775	-1.29351	0.348738	4.46657	0.614394	0.138772	0.00178329	0.0436559	0.0436559
EPB41	ENST00000642937.1	0.000208418	0.00388456	-1.38356	0.37307	6.69112	0.614313	0.196691	-0.146642	0.0120811	0.0120811
TERT	ENST00000310581.9	0.000208726	0.00388927	-0.751086	0.202547	4.61651	0.218412	0.0232919	0.0381749	0.0382457	0.0382457
SUGT1	ENST00000483074.1	0.000208999	0.00389229	-0.66288	0.178776	4.74038	0.1677	0.0132633	0.0315831	0.0346778	0.0346778
DPYSL2	ENST00000521913.7	0.000209341	0.00389659	-1.82724	0.492853	4.43115	1.24505	0.319201	-0.0149399	0.0451553	0.0451553
RSKR	ENST00000584196.1	0.000210683	0.00391845	-0.615908	0.166199	4.93083	0.141096	0.0111551	0.0229615	0.030278	0.030278
DDX3X	ENST00000457138.7	0.000211375	0.00393028	-5.2481	1.41648	1.93091	8.30949	2.13165	-2.07324	0.877982	0.877982
LARGE2	ENST00000528236.5	0.000211667	0.00393467	-0.929178	0.250813	4.80275	0.325706	0.0612457	0.0221224	0.0331148	0.0331148
EIF3M	ENST00000532444.5	0.00021202	0.0039402	-0.595939	0.16088	6.16619	0.136694	0.0241186	0.0135697	0.014705	0.014705
C12orf45	ENST00000552951.7	0.000212108	0.00394079	-0.863246	0.233049	7.60387	0.288733	0.00062285	0.0808449	0.00966008	0.0808449
TTC14	ENST00000296015.9	0.000212333	0.00394393	-0.760442	0.20531	5.13766	0.224064	0.0328927	0.0303355	0.0264201	0.0303355
ASNS	ENST00000454046.5	0.000219021	0.00404783	-1.21602	0.32901	6.5696	0.573511	0.0741675	0.0882041	0.0126378	0.0882041
TMEM132C	ENST00000435159.2	0.000219358	0.00405085	-0.978471	0.264766	5.38844	0.371343	0.00554207	0.0996091	0.0223187	0.0996091
TACR1	ENST00000305249.10	0.000219503	0.00405248	-1.95582	0.529253	4.20444	1.4837	0.0277905	0.392372	0.0575299	0.392372
PAK1	ENST00000530617.5	0.000219638	0.00405283	-0.750893	0.203203	6.2782	0.218702	0.0265681	0.035369	0.0140911	0.035369
FXYD7	ENST00000270310.6	0.000219637	0.00405283	-1.07656	0.291332	3.80427	0.382317	0.0259847	0.0172957	0.101327	0.101327
PMEPA1	ENST00000341744.8	0.000221308	0.00407724	-1.13356	0.306919	5.48214	0.49853	0.0411795	0.10012	0.0208769	0.10012
ATP1A2	ENST00000361216.7	0.000227833	0.00418976	-1.09822	0.297946	6.07066	0.468353	0.00962261	0.123535	0.0152769	0.123535
ATP5MD	ENST00000369815.6	0.000230001	0.004223	-0.9465	0.256953	4.81863	0.347989	0.029818	0.0692191	0.032738	0.0692191
SMARCA2	ENST00000634931.1	0.000230702	0.00423144	-4.25311	1.15486	2.31469	6.65239	1.37035	0.161786	0.630207	0.630207
GRIP2	ENST00000637182.1	0.000231663	0.00424242	-1.07238	0.29127	3.90429	0.431964	0.0402704	0.0684383	0.0869872	0.0869872
DSG3	ENST00000257189.5	0.000232453	0.00425467	-1.92785	0.523749	2.95964	1.26897	0.089882	0.102606	0.321588	0.321588
SDHAF3	ENST00000432641.2	0.000233034	0.00426194	-0.691694	0.187949	4.6703	0.165572	0.0163755	0.0111743	0.0366119	0.0366119
DNAH14	ENST00000366850.7	0.000235468	0.00430201	-0.713287	0.193956	4.73836	0.191652	0.0216977	0.0270756	0.0347308	0.0347308
FAM207A	ENST00000397826.7	0.000237262	0.00432917	-0.605553	0.164748	5.43913	0.142579	0.0135621	0.0271508	0.0215173	0.0271508
CTU2	ENST00000453996.7	0.000239062	0.00435635	-0.618315	0.168308	5.42908	0.148687	0.0127908	0.0297008	0.0216736	0.0297008
EPB41	ENST00000646871.1	0.000239478	0.0043628	-0.7207	0.196202	5.10653	0.202017	0.00725477	0.050488	0.0269609	0.050488
CFAP92	ENST00000515659.1	0.000242393	0.0044102	-0.842577	0.229575	4.16367	0.23865	0.0185925	0.0134938	0.0604642	0.0604642
MRPL2	ENST00000480286.1	0.000243892	0.00443518	-0.708272	0.193064	5.36177	0.195223	0.0222288	0.0336818	0.0227432	0.0336818
C12orf66	ENST00000398055.7	0.00024488	0.00445199	-0.709827	0.193542	4.8193	0.196107	0.0207405	0.0354474	0.0327221	0.0354474
GAP43	ENST00000305124.10	0.000250679	0.00454331	-1.07215	0.292812	6.49346	0.447738	0.0016992	0.126909	0.0130091	0.126909
UPF3B	ENST00000276201.6	0.000250992	0.00454782	-1.02153	0.279012	5.35152	0.406474	0.0439585	0.0728127	0.0229067	0.0728127
GRPEL2	ENST00000329271.8	0.000254868	0.00461211	-0.732327	0.200236	7.29264	0.209004	0.00121597	0.0589258	0.0101759	0.0589258
TBC1D23	ENST00000486274.5	0.000256544	0.0046358	-3.76383	1.0296	2.09869	5.522	0.636893	0.953208	0.763452	0.953208
ZFP42	ENST00000326866.5	0.000257693	0.00465006	-0.840295	0.229935	5.89846	0.275273	0.0208785	0.0584267	0.0164717	0.0584267
KLF7	ENST00000412414.6	0.000261603	0.00471093	-4.46331	1.22261	2.7392	7.77007	1.72169	0.520488	0.412771	0.520488
LRRK1	ENST00000388948.8	0.000262332	0.00472285	-0.915303	0.250774	5.1111	0.326799	0.0292958	0.0650356	0.0268809	0.0650356
GTDC1	ENST00000392869.6	0.000262448	0.00472372	-0.910546	0.249479	4.06548	0.282423	0.024527	0.017591	0.0688324	0.0688324
ELAVL3	ENST00000359227.8	0.000262543	0.00472423	-2.36387	0.647689	2.66108	1.71393	0.180213	-0.13326	0.449038	0.449038
SUB1	ENST00000512913.5	0.00026274	0.00472536	-4.04423	1.10816	2.42292	6.38035	0.262914	1.5791	0.570154	1.5791
ZNF732	ENST00000419098.5	0.000265309	0.0047679	-0.638336	0.17503	6.29976	0.159005	0.00350555	0.0424477	0.0139783	0.0424477
ZNF577	ENST00000301399.11	0.000265544	0.0047709	-0.93267	0.255752	4.66112	0.302104	0.0612323	-0.00980472	0.0368809	0.0368809
NFKBIB	ENST00000313582.6	0.000268456	0.00481338	-0.679318	0.186422	4.58485	0.156789	0.0128537	0.01008	0.0392761	0.0392761
NFKBIB	ENST00000635517.2	0.000268456	0.00481338	-0.679318	0.186422	4.58485	0.156789	0.0128537	0.01008	0.0392761	0.0392761
TRIM9	ENST00000298355.7	0.000269242	0.004825	-1.40408	0.385396	4.01167	0.769671	0.0254892	0.197305	0.0742522	0.197305
ZNF501	ENST00000620116.5	0.000270121	0.00483706	-0.812244	0.222998	4.74045	0.249584	0.0399158	0.0246616	0.0346761	0.0346761
ZNF501	ENST00000625592.3	0.000270121	0.00483706	-0.812244	0.222998	4.74045	0.249584	0.0399158	0.0246616	0.0346761	0.0346761
LINC00680	ENST00000422882.1	0.000271263	0.00485627	-0.717843	0.197139	4.66906	0.201226	0.0109701	0.0473256	0.036648	0.0473256
USP15	ENST00000353364.7	0.00027204	0.00486771	-0.790685	0.217187	5.39108	0.20047	0.048479	-0.0323346	0.0222766	0.0222766
CASZ1	ENST00000496432.6	0.000272523	0.0048751	-0.973497	0.267436	4.23402	0.305511	0.0516977	-0.0251957	0.0555857	0.0555857
MCC	ENST00000511847.2	0.00028081	0.00499537	-3.54103	0.97485	1.92704	4.71188	0.544774	0.642982	0.880724	0.880724
SESN2	ENST00000253063.4	0.000281943	0.00501045	-0.910629	0.250769	6.49035	0.324236	0.000726435	0.093601	0.0130243	0.093601
SESN2	ENST00000645231.2	0.000281943	0.00501045	-0.910629	0.250769	6.49035	0.324236	0.000726435	0.093601	0.0130243	0.093601
SMG1	ENST00000446231.6	0.000282355	0.00501652	-0.626893	0.172652	8.58655	0.153669	0.000428966	0.0442838	0.00982959	0.0442838
AL163636.2	ENST00000553909.1	0.00028641	0.00508341	-3.41569	0.941665	2.82377	4.56417	0.826054	0.504045	0.375782	0.504045
DMXL1	ENST00000311085.8	0.000287286	0.00509639	-0.979047	0.26997	7.25449	0.37502	0.0112656	0.09806	0.0102595	0.09806
TCF24	ENST00000563496.2	0.000289438	0.00513189	-2.20363	0.607968	2.79291	1.60088	0.165439	0.0146764	0.388999	0.388999
KIF17	ENST00000463389.1	0.000289506	0.00513189	-3.35722	0.926254	1.70471	4.18075	0.24138	0.757965	1.04554	1.04554
CTCFL	ENST00000243914.7	0.000290507	0.00514704	-4.92069	1.35795	1.7672	7.38219	1.76851	-1.62072	0.997533	0.997533
FAXC	ENST00000389677.6	0.000290464	0.00514704	-0.675368	0.186377	4.57718	0.17852	0.0113538	0.040751	0.039534	0.040751
CNMD	ENST00000448904.6	0.000290939	0.00515339	-2.46079	0.67917	4.18099	2.27597	0.632728	-0.0585852	0.0591806	0.0591806
CA13	ENST00000321764.4	0.000292505	0.00517721	-0.674488	0.186228	4.49931	0.156828	0.00966911	0.0157651	0.0423519	0.0423519
ZNRF3	ENST00000406323.3	0.000292605	0.00517768	-0.792783	0.218894	5.45472	0.246049	0.0144544	0.0574178	0.0212799	0.0574178
COX5A	ENST00000322347.11	0.000294386	0.00520526	-0.597257	0.16498	5.22568	0.124588	0.0158865	0.00607984	0.0249408	0.0249408
MKX	ENST00000460919.2	0.000295164	0.00521246	-3.15265	0.871018	2.04244	3.73769	0.337134	0.607768	0.800874	0.800874
PCDHGA6	ENST00000610583.1	0.000296478	0.00523172	-0.896858	0.247863	4.15191	0.264687	0.0307867	-0.0015609	0.0613675	0.0613675
AKNA	ENST00000374088.7	0.000297338	0.00524558	-1.62159	0.44825	6.65193	1.02998	0.0325801	0.268812	0.0122535	0.268812
C1orf226	ENST00000458626.4	0.000297482	0.0052468	-1.03556	0.286265	6.18286	0.420053	0.00271281	0.120209	0.0146102	0.120209
RPS14	ENST00000401695.8	0.000297796	0.00524971	-0.656264	0.181428	4.68754	0.157156	0.0132574	0.0216824	0.0361168	0.0361168
HNRNPDL	ENST00000349655.8	0.000298661	0.00526232	-1.42262	0.393374	5.66212	0.792847	0.195743	0.0363712	0.0186294	0.0363712
KLK13	ENST00000595793.6	0.000299085	0.00526582	-1.20395	0.332942	3.71915	0.469312	0.050736	-0.00765711	0.11554	0.11554
RFLNA	ENST00000546355.3	0.000299429	0.00527057	-1.92844	0.533337	4.51194	1.21346	0.384804	-0.262555	0.0418685	0.0418685
PRKRA	ENST00000432031.6	0.000300029	0.0052798	-0.876387	0.242412	4.88008	0.256517	0.0567959	-0.0241699	0.0313497	0.0313497
ZNF3	ENST00000303915.10	0.000304798	0.00535032	-0.73826	0.204437	5.54053	0.213662	0.0143279	0.0483637	0.0200761	0.0483637
NACC1	ENST00000586171.2	0.000309636	0.00542442	-0.999339	0.277048	4.42916	0.39171	0.01872	0.096413	0.0452427	0.096413
Z83844.1	ENST00000455236.4	0.000310013	0.00542967	-5.02486	1.39317	1.81929	7.72091	1.95281	-1.77013	0.958566	0.958566
HK2	ENST00000409174.1	0.000315736	0.00551341	-0.787808	0.218712	6.18915	0.218253	0.0571775	-0.0171021	0.0145748	0.0145748
CARD11	ENST00000396946.8	0.000319135	0.00556723	-0.633331	0.175962	6.32399	0.157487	0.00210135	0.0443425	0.013853	0.0443425
FGF7P6	ENST00000377614.7	0.000319382	0.00556878	-0.619908	0.172242	4.7984	0.138768	0.0112813	0.0180715	0.0332197	0.0332197
CENPX	ENST00000392359.8	0.000323218	0.00562869	-0.597157	0.166064	5.25236	0.131574	0.0168623	0.0138814	0.0245037	0.0245037
CYB5A	ENST00000397914.4	0.000326838	0.0056861	-0.648424	0.180467	4.92363	0.138946	0.0184259	-0.00241386	0.0304263	0.0304263
CCNB1IP1	ENST00000556563.5	0.000329776	0.00572402	-0.641094	0.178542	5.69355	0.161553	0.00679141	0.0410245	0.0182977	0.0410245
STC2	ENST00000265087.8	0.00033602	0.0058156	-1.56852	0.437423	7.48731	0.967684	0.000810272	0.286198	0.00981955	0.286198
CBLL1	ENST00000432748.5	0.0003373	0.00582935	-0.987804	0.275551	3.98046	0.332186	0.0362096	0.0131144	0.0776831	0.0776831
FUT1	ENST00000645652.1	0.000338639	0.00585085	-0.760275	0.212142	5.3439	0.227411	0.026941	0.0405656	0.0230283	0.0405656
TAF1D	ENST00000526015.5	0.000341772	0.00589194	-0.638676	0.178332	7.17491	0.160535	0.00172634	0.0459771	0.0104488	0.0459771
MYEF2	ENST00000616409.4	0.000342335	0.0058989	-0.706087	0.197178	6.01186	0.196223	0.00826759	0.0500512	0.0156579	0.0500512
HLA-DRA	ENST00000383127.6	0.000342431	0.0058989	-3.36649	0.940128	1.83164	4.33245	0.376291	0.789304	0.94947	0.94947
FAS	ENST00000355740.7	0.00034482	0.00593575	-3.48686	0.974237	1.80434	4.35079	0.454052	0.425104	0.969655	0.969655
ENY2	ENST00000522766.5	0.000345329	0.00594159	-4.06767	1.13664	1.34073	5.0174	0.587865	-0.520824	1.35005	1.35005
SFRP2	ENST00000274063.5	0.000362064	0.00618863	-0.777496	0.218012	7.62458	0.238385	0.000517815	0.0707762	0.00963583	0.0707762
FASTKD1	ENST00000453153.7	0.000372491	0.00635604	-0.614034	0.172537	5.79024	0.148834	0.0110638	0.03359	0.0173696	0.03359
ELMOD1	ENST00000265840.12	0.000373564	0.00637126	-3.48247	0.978748	1.88315	4.78782	0.198553	1.23837	0.912066	1.23837
FAM162A	ENST00000469967.1	0.000375759	0.00639643	-0.94039	0.264411	4.44714	0.349195	0.0294902	0.0753793	0.0444664	0.0753793
VCAN	ENST00000503923.1	0.000376303	0.00640398	-0.628039	0.176606	4.74522	0.140448	0.0122326	0.0154147	0.0345517	0.0345517
ZNF90	ENST00000469078.5	0.000379995	0.00645744	-0.651477	0.183329	5.26838	0.163176	0.0261712	0.0186403	0.0242429	0.0242429
AGMAT	ENST00000375826.4	0.000382743	0.00649628	-0.719498	0.202578	4.3647	0.201991	0.0133113	0.0450482	0.0482457	0.0482457
ETV4	ENST00000538265.5	0.000386406	0.0065458	-5.22083	1.47099	3.39608	10.7737	1.44522	1.80049	0.186871	1.80049
KAT7	ENST00000513171.5	0.000391473	0.00661888	-0.712447	0.200929	6.24067	0.200721	0.0046135	0.0559452	0.0142912	0.0559452
ERVK3-1	ENST00000427361.5	0.000394917	0.0066739	-0.64879	0.183095	5.25627	0.136756	0.0258459	-0.0127492	0.0244399	0.0244399
WDR1	ENST00000382452.6	0.000397473	0.00671063	-0.620226	0.175118	6.4233	0.123976	0.032646	-0.0219313	0.0133536	0.0133536
MYO10	ENST00000515803.5	0.000400709	0.00676041	-0.760281	0.214792	7.69073	0.228771	0.00228364	0.0669197	0.00956655	0.0669197
GCA	ENST00000479199.1	0.000404717	0.00681931	-0.590443	0.166934	5.06766	0.132991	0.0141478	0.0213576	0.0276526	0.0276526
NDUFA10	ENST00000252711.7	0.00040488	0.00681931	-0.624236	0.176493	4.61495	0.154281	0.00756286	0.0391619	0.0382955	0.0391619
NA	ENST00000630647.3	0.00040488	0.00681931	-0.624236	0.176493	4.61495	0.154281	0.00756286	0.0391619	0.0382955	0.0391619
KLHL34	ENST00000379499.3	0.000408437	0.00687428	-2.77315	0.784579	2.1804	2.41445	0.212319	-0.078145	0.711028	0.711028
PPCDC	ENST00000563393.1	0.000411251	0.00691171	-0.96568	0.27335	4.29415	0.310859	0.0601024	-0.0212298	0.0519781	0.0519781
OSGEPL1	ENST00000264151.10	0.000412657	0.00692871	-0.808805	0.229003	4.8821	0.211068	0.0473576	-0.0288346	0.0313058	0.0313058
DPEP3	ENST00000268793.5	0.00041304	0.00693349	-1.2563	0.355732	4.64304	0.625344	0.012727	0.17709	0.0374223	0.17709
NIFK	ENST00000447132.5	0.00042026	0.00704123	-0.728827	0.206641	5.92004	0.210597	0.0115576	0.052493	0.0163078	0.052493
PLAAT3	ENST00000394613.3	0.000421476	0.00705993	-0.935854	0.265396	5.67658	0.347268	0.0176051	0.0880472	0.0184749	0.0880472
CPNE7	ENST00000319518.13	0.000422771	0.00707823	-0.968958	0.274847	4.36179	0.364157	0.0649212	0.0381949	0.0483902	0.0483902
ABCA11P	ENST00000504019.1	0.000427935	0.00715617	-0.823843	0.233898	4.23138	0.248446	0.0263086	0.0297296	0.055754	0.055754
TNFRSF11B	ENST00000297350.9	0.000428211	0.00715909	-1.34768	0.382639	5.40507	0.720566	0.00785401	0.211765	0.0220543	0.211765
NA	ENST00000461451.1	0.000428517	0.00716251	-0.755664	0.214563	4.33445	0.211963	0.0192711	0.0315479	0.049785	0.049785
KCNK10	ENST00000340700.9	0.000429074	0.00716888	-2.0859	0.592328	2.9418	1.38873	0.197953	-0.0936547	0.328325	0.328325
RRM2B	ENST00000251810.7	0.000429103	0.00716888	-0.746048	0.211855	7.36487	0.220835	0.000756844	0.0665669	0.0100302	0.0665669
GNAI1	ENST00000351004.8	0.000436371	0.00726957	-0.805308	0.228973	5.56092	0.224881	0.0588288	-0.0209237	0.0198139	0.0198139
ME2	ENST00000639850.1	0.000437473	0.00728447	-0.740515	0.21059	5.98962	0.217727	0.0495433	0.016979	0.0158087	0.016979
GABRG1	ENST00000295452.5	0.000444305	0.00737727	-1.88016	0.535312	2.95757	1.40437	0.080541	0.349297	0.322362	0.349297
TFPI	ENST00000421427.5	0.000448707	0.00744157	-0.704393	0.200702	5.95472	0.197189	0.00341736	0.0570047	0.0160537	0.0570047
UNC79	ENST00000553484.5	0.000460385	0.00762266	-1.34563	0.384158	3.77549	0.614957	0.115446	-0.0257698	0.10592	0.10592
UNC79	ENST00000629588.2	0.000460385	0.00762266	-1.34563	0.384158	3.77549	0.614957	0.115446	-0.0257698	0.10592	0.10592
LRP11	ENST00000367368.3	0.000463448	0.00766434	-1.59786	0.456397	3.18532	0.840761	0.0662591	0.027254	0.246188	0.246188
ASNS	ENST00000444334.5	0.000465466	0.00769591	-1.14014	0.325766	7.21456	0.517325	0.0211551	0.13803	0.0103519	0.13803
SNAI1P1	ENST00000428587.1	0.000470352	0.00776572	-3.24474	0.92784	1.61006	3.47202	0.170549	0.221338	1.12078	1.12078
TMEM198	ENST00000373883.3	0.000472539	0.00779635	-0.672055	0.192243	4.57039	0.156379	0.015671	0.0104318	0.0397652	0.0397652
NIPA1	ENST00000559448.5	0.000476345	0.00784625	-1.44805	0.414472	4.99008	0.774894	0.228581	-0.0462781	0.0290994	0.0290994
[truncated: 568 more rows]

## Sheet: M v CM, CM up
ext_gene	target_id	pval	qval	b	se_b	mean_obs	var_obs	tech_var	sigma_sq	smooth_sigma_sq	final_sigma_sq
[truncated: 2,676 more rows]

[truncated: 5 more sheets: CM v CP, CM up, CM v CP, CP up, CP v MC, CP up, CP v MC, MC up, Read Summary]
